# Supplementary material for: Microphthalmia in Texel Sheep Is Associated with a Missense Mutation in the Paired-Like Homeodomain 3 (PITX3) Gene
Source: PubMed Central journal article supplement (PMC2805710; doi:10.1371/journal.pone.0008689), 2010-01-13

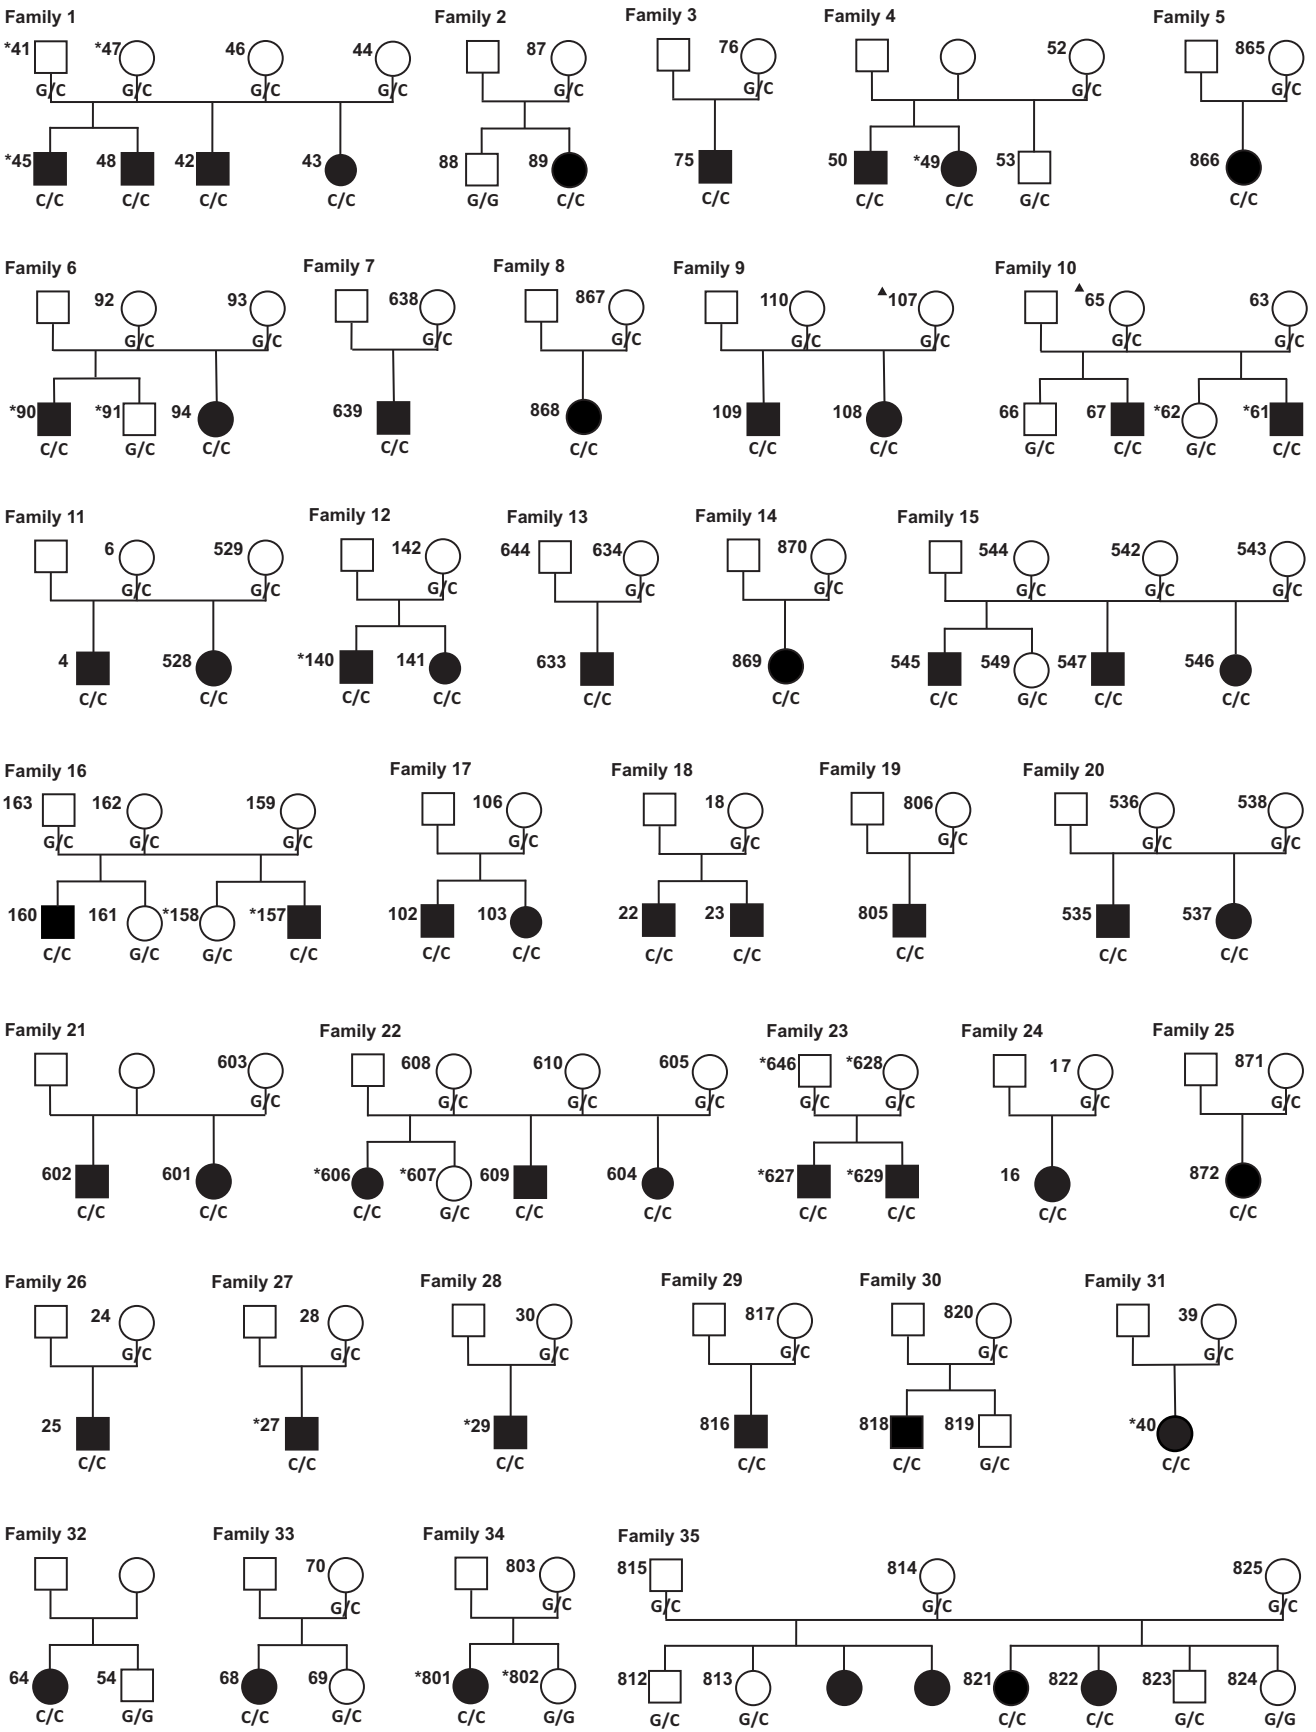

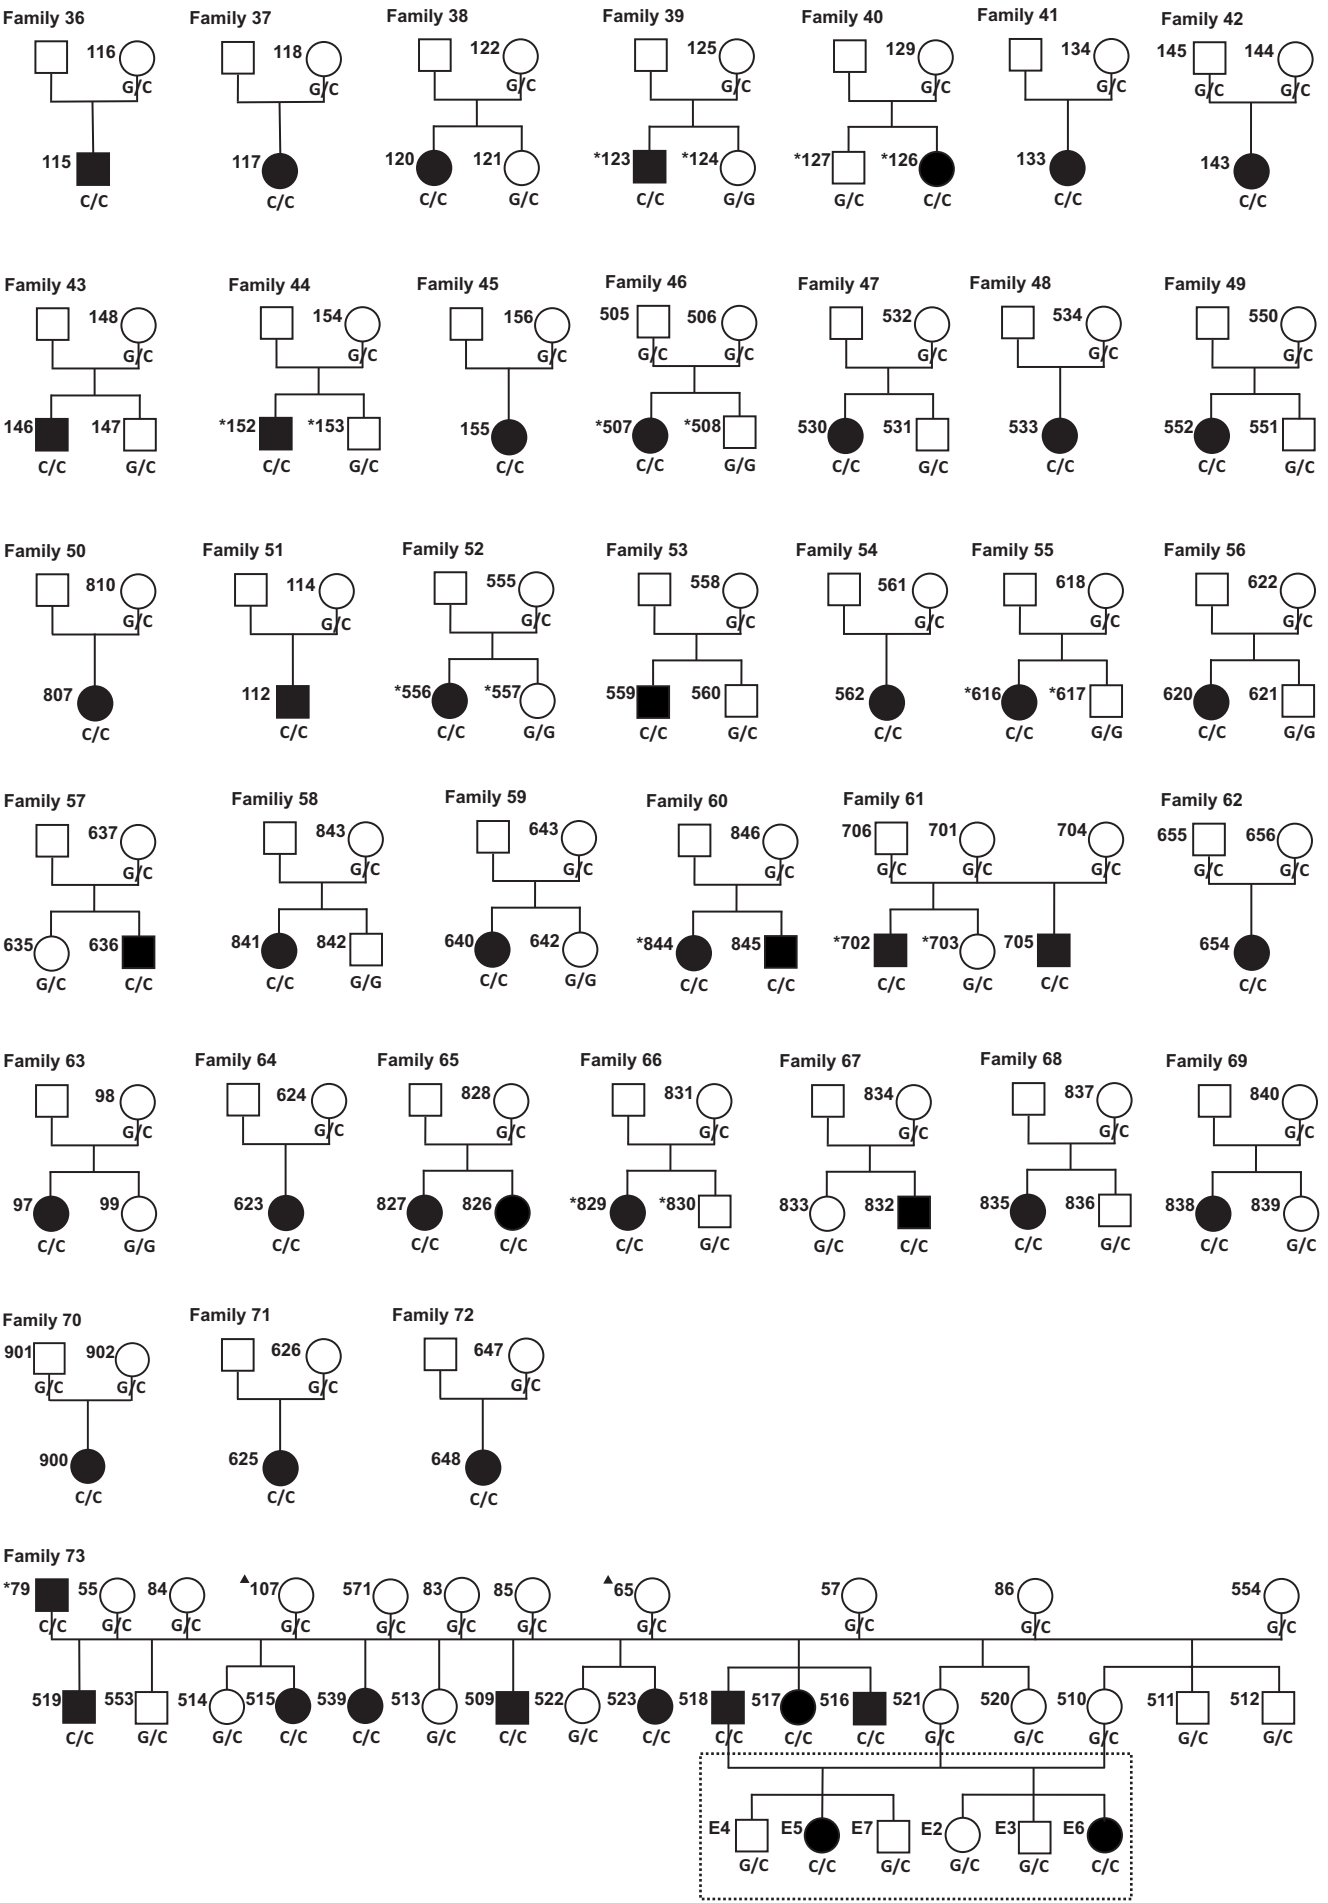

Supplement: pone.0008689.s001.pdf [file pone.0008689.s001.pdf]
