# Supplementary material for: Microphthalmia in Texel Sheep Is Associated with a Missense Mutation in the Paired-Like Homeodomain 3 (PITX3) Gene
Source: PubMed Central journal article supplement (PMC2805710; doi:10.1371/journal.pone.0008689), 2010-01-13
Supplement: pone.0008689.s003.pdf [file pone.0008689.s003.pdf]

**Table S1.** Results of homozygosity mapping.

The table shows a slightly modified version of the PLINK output file "plink.hom.overlap". Only one interval on chromosome 22 showed homozygosity and shared alleles across all twenty-three affected sheep (highlighted in gray). For the analysis the following PLINK options were used: --sheep --homozyg-kb 100 --homozyg-snp 30--homozyg-gap 2500--homozyg-density 250--homozyg-group --homozyg-window-snp 20--homozyg-window-missing 5--homozyg-match 0.95--maf 0--hwe 0--max-maf 1.0 --geno 0.10 --mind 0.15--filter-cases--allow-no-sex

| POOL |       | IID | CHR | SNP1             | SNP2             | KB      | NSNP | NSI |
|------|-------|-----|-----|------------------|------------------|---------|------|-----|
| S1   |       | 844 | 22  | OAR22_24300913.1 | OAR22_28815692.1 | 4514.78 | 77   |     |
| S1   |       | 556 | 22  | s70367.1         | OAR22_26886276.1 | 2667.33 | 47   |     |
| S1   |       | 616 | 22  | OAR22_24105777.1 | OAR22_29668920.1 | 5563.14 | 102  |     |
| S1   |       | 45  | 22  | OAR22_23956504.1 | OAR22_28815692.1 | 4859.19 | 86   |     |
| S1   |       | 829 | 22  | OAR22_23956504.1 | OAR22_28815692.1 | 4859.19 | 86   |     |
| S1   |       | 606 | 22  | OAR22_22756887.1 | OAR22_34014868.1 | 11258   | 219  |     |
| S1   |       | 90  | 22  | OAR22_22756887.1 | OAR22_29668920.1 | 6912.03 | 124  |     |
| S1   |       | 152 | 22  | OAR22_22699919.1 | OAR22_29668920.1 | 6969    | 125  |     |
| S1   |       | 801 | 22  | s50496.1         | OAR22_28815692.1 | 6200.11 | 108  |     |
| S1   |       | 627 | 22  | s05380.1         | OAR22_31098866.1 | 8673.81 | 167  |     |
| S1   |       | 629 | 22  | s05380.1         | OAR22_31098866.1 | 8673.81 | 167  |     |
| S1   |       | 27  | 22  | OAR22_22410821.1 | OAR22_28815692.1 | 6404.87 | 113  |     |
| S1   |       | 79  | 22  | OAR22_22410821.1 | OAR22_28815692.1 | 6404.87 | 113  |     |
| S1   |       | 157 | 22  | OAR22_22410821.1 | OAR22_28815692.1 | 6404.87 | 113  |     |
| S1   |       | 40  | 22  | OAR22_22410821.1 | OAR22_28320087.1 | 5909.27 | 104  |     |
| S1   |       | 126 | 22  | s11593.1         | OAR22_36686850.1 | 14557   | 280  |     |
| S1   |       | 29  | 22  | OAR22_21956630.1 | OAR22_31064768.1 | 9108.14 | 176  |     |
| S1   |       | 140 | 22  | s53575.1         | OAR22_29668920.1 | 7750.65 | 144  |     |
| S1   |       | 507 | 22  | s06758.1         | OAR22_42355166.1 | 24436.4 | 466  |     |
| S1   |       | 123 | 22  | OAR22_17622066.1 | OAR22_28097363.1 | 10475.3 | 179  |     |
| S1   |       | 61  | 22  | OAR22_14956172.1 | s08672.1         | 23753.1 | 404  |     |
| S1   |       | 49  | 22  | OAR22_12868251.1 | OAR22_35805166.1 | 22936.9 | 381  |     |
| S1   |       | 702 | 22  | OAR22_9619017.1  | s61119.1         | 25865.1 | 434  |     |
| S1   | CON   | 23  | 22  | OAR22_24300913.1 | OAR22_26886276.1 | 2585.36 | 45   |     |
| S1   | UNION | 23  | 22  | OAR22_9619017.1  | OAR22_42355166.1 | 32736.1 | 572  |     |
| S10  |       | 507 | 2   | s20121.1         | OAR2_134249434.1 | 7112.48 | 154  |     |
| S10  |       | 844 | 2   | s20121.1         | OAR2_133793734.1 | 6656.78 | 145  |     |
| S10  |       | 61  | 2   | OAR2_126263077.1 | OAR2_134940115.1 | 8677.04 | 181  |     |
| S10  |       | 123 | 2   | OAR2_126263077.1 | OAR2_128764057.1 | 2500.98 | 45   |     |
| S10  |       | 616 | 2   | OAR2_124098623.1 | OAR2_128764057.1 | 4665.43 | 89   |     |
| S10  |       | 29  | 2   | OAR2_119004082.1 | OAR2_132080120.1 | 13076   | 229  |     |
| S10  |       | 126 | 2   | OAR2_116277389.1 | OAR2_134940115.1 | 18662.7 | 353  |     |
| S10  |       | 627 | 2   | OAR2_116277389.1 | OAR2_127514723.1 | 11237.3 | 193  |     |
| S10  |       | 629 | 2   | OAR2_116277389.1 | OAR2_127514723.1 | 11237.3 | 193  |     |
| S10  |       | 45  | 2   | OAR2_116066653.1 | OAR2_128764057.1 | 12697.4 | 221  |     |
| S10  |       | 140 | 2   | OAR2_116066653.1 | OAR2_127514723.1 | 11448.1 | 197  |     |
| S10  |       | 829 | 2   | OAR2_116066653.1 | OAR2_127514723.1 | 11448.1 | 197  |     |
| S10  |       | 27  | 2   | OAR2_115851252.1 | OAR2_129745095.1 | 13893.8 | 249  |     |
| S10  |       | 90  | 2   | s70568.1         | OAR2_127514723.1 | 15298.4 | 269  |     |
| S10  | CON   | 14  | 2   | s20121.1         | OAR2_127514723.1 | 377.77  | 9    |     |
| S10  | UNION | 14  | 2   | s70568.1         | OAR2_134940115.1 | 22723.8 | 429  |     |
| S11  |       | 61  | 2   | OAR2_126263077.1 | OAR2_134940115.1 | 8677.04 | 181  |     |
| S11  |       | 123 | 2   | OAR2_126263077.1 | OAR2_128764057.1 | 2500.98 | 45   |     |
| S11  |       | 616 | 2   | OAR2_124098623.1 | OAR2_128764057.1 | 4665.43 | 89   |     |
| S11  |       | 29  | 2   | OAR2_119004082.1 | OAR2_132080120.1 | 13076   | 229  |     |
| S11  |       | 126 | 2   | OAR2_116277389.1 | OAR2_134940115.1 | 18662.7 | 353  |     |
| S11  |       | 627 | 2   | OAR2_116277389.1 | OAR2_127514723.1 | 11237.3 | 193  |     |

|     |       |     |    |                  |                  |         |     |
|-----|-------|-----|----|------------------|------------------|---------|-----|
| S11 |       | 629 | 2  | OAR2_116277389.1 | OAR2_127514723.1 | 11237.3 | 193 |
| S11 |       | 507 | 2  | OAR2_116277389.1 | s75747.1         | 10718   | 183 |
| S11 |       | 45  | 2  | OAR2_116066653.1 | OAR2_128764057.1 | 12697.4 | 221 |
| S11 |       | 140 | 2  | OAR2_116066653.1 | OAR2_127514723.1 | 11448.1 | 197 |
| S11 |       | 829 | 2  | OAR2_116066653.1 | OAR2_127514723.1 | 11448.1 | 197 |
| S11 |       | 27  | 2  | OAR2_115851252.1 | OAR2_129745095.1 | 13893.8 | 249 |
| S11 |       | 90  | 2  | s70568.1         | OAR2_127514723.1 | 15298.4 | 269 |
| S11 | CON   | 13  | 2  | OAR2_126263077.1 | s75747.1         | 732.332 | 11  |
| S11 | UNION | 13  | 2  | s70568.1         | OAR2_134940115.1 | 22723.8 | 429 |
|     |       |     |    |                  |                  |         |     |
| S13 |       | 79  | 13 | s27782.1         | s05134.1         | 2127.73 | 36  |
| S13 |       | 61  | 13 | OAR13_43334843.1 | s53991.1         | 1929.67 | 33  |
| S13 |       | 49  | 13 | s47368.1         | OAR13_44694056.1 | 2372.15 | 41  |
| S13 |       | 616 | 13 | OAR13_41982854.1 | s13311.1         | 2969.55 | 51  |
| S13 |       | 27  | 13 | s37104.1         | s13311.1         | 3054.99 | 53  |
| S13 |       | 152 | 13 | s37104.1         | s13311.1         | 3054.99 | 53  |
| S13 |       | 606 | 13 | s37104.1         | s13311.1         | 3054.99 | 53  |
| S13 |       | 40  | 13 | s37104.1         | s13311.1         | 3054.99 | 53  |
| S13 |       | 829 | 13 | s37104.1         | s13311.1         | 3054.99 | 53  |
| S13 |       | 844 | 13 | s37104.1         | s13878.1         | 2832.35 | 49  |
| S13 |       | 801 | 13 | OAR13_40723732.1 | OAR13_44858092.1 | 4134.36 | 68  |
| S13 |       | 556 | 13 | s18674.1         | OAR13_44631782.1 | 5987.19 | 98  |
| S13 | CON   | 12  | 13 | s27782.1         | OAR13_44631782.1 | 42.078  | 3   |
| S13 | UNION | 12  | 13 | s18674.1         | s05134.1         | 8072.84 | 131 |
|     |       |     |    |                  |                  |         |     |
| S16 |       | 61  | 13 | OAR13_43334843.1 | s53991.1         | 1929.67 | 33  |
| S16 |       | 49  | 13 | s47368.1         | OAR13_44694056.1 | 2372.15 | 41  |
| S16 |       | 616 | 13 | OAR13_41982854.1 | s13311.1         | 2969.55 | 51  |
| S16 |       | 27  | 13 | s37104.1         | s13311.1         | 3054.99 | 53  |
| S16 |       | 152 | 13 | s37104.1         | s13311.1         | 3054.99 | 53  |
| S16 |       | 606 | 13 | s37104.1         | s13311.1         | 3054.99 | 53  |
| S16 |       | 40  | 13 | s37104.1         | s13311.1         | 3054.99 | 53  |
| S16 |       | 829 | 13 | s37104.1         | s13311.1         | 3054.99 | 53  |
| S16 |       | 844 | 13 | s37104.1         | s13878.1         | 2832.35 | 49  |
| S16 |       | 79  | 13 | s74098.1         | s07261.1         | 2464.24 | 39  |
| S16 |       | 801 | 13 | OAR13_40723732.1 | OAR13_44858092.1 | 4134.36 | 68  |
| S16 |       | 556 | 13 | s18674.1         | OAR13_44631782.1 | 5987.19 | 98  |
| S16 | CON   | 12  | 13 | OAR13_43334843.1 | s07261.1         | 333.724 | 7   |
| S16 | UNION | 12  | 13 | s18674.1         | s53991.1         | 6619.93 | 107 |
|     |       |     |    |                  |                  |         |     |
| S19 |       | 126 | 5  | s52618.1         | OAR5_72565538.1  | 7244.72 | 139 |
| S19 |       | 29  | 5  | s07518.1         | OAR5_68302417.1  | 3681.04 | 76  |
| S19 |       | 801 | 5  | OAR5_63945337.1  | s66569.1         | 3127.86 | 66  |
| S19 |       | 27  | 5  | OAR5_63370705.1  | s36664.1         | 5079.16 | 100 |
| S19 |       | 507 | 5  | OAR5_63370705.1  | s66569.1         | 3702.49 | 72  |
| S19 |       | 123 | 5  | OAR5_63370705.1  | s48255.1         | 3026.44 | 56  |
| S19 |       | 844 | 5  | OAR5_63370705.1  | s48255.1         | 3026.44 | 56  |
| S19 |       | 45  | 5  | s49473.1         | s45311.1         | 3758.74 | 71  |
| S19 |       | 90  | 5  | DU444709_372.1   | OAR5_68350537.1  | 7925.86 | 122 |
| S19 |       | 79  | 5  | OAR5_57265711.1  | s17800.1         | 9271.25 | 138 |
| S19 |       | 629 | 5  | OAR5_57983508.1  | OAR5_71824766.1  | 13841.3 | 230 |
| S19 |       | 627 | 5  | OAR5_57983508.1  | OAR5_66325807.1  | 8342.3  | 120 |
| S19 | CON   | 12  | 5  | s52618.1         | OAR5_66325807.1  | 1004.99 | 18  |
| S19 | UNION | 12  | 5  | OAR5_57265711.1  | OAR5_72565538.1  | 15299.8 | 253 |

|     |       |     |   |                  |                  |         |     |
|-----|-------|-----|---|------------------|------------------|---------|-----|
| S20 |       | 616 | 2 | OAR2_124098623.1 | OAR2_128764057.1 | 4665.43 | 89  |
| S20 |       | 152 | 2 | OAR2_124098623.1 | OAR2_125967358.1 | 1868.73 | 42  |
| S20 |       | 29  | 2 | OAR2_119004082.1 | OAR2_132080120.1 | 13076   | 229 |
| S20 |       | 126 | 2 | OAR2_116277389.1 | OAR2_134940115.1 | 18662.7 | 353 |
| S20 |       | 627 | 2 | OAR2_116277389.1 | OAR2_127514723.1 | 11237.3 | 193 |
| S20 |       | 629 | 2 | OAR2_116277389.1 | OAR2_127514723.1 | 11237.3 | 193 |
| S20 |       | 507 | 2 | OAR2_116277389.1 | s75747.1         | 10718   | 183 |
| S20 |       | 45  | 2 | OAR2_116066653.1 | OAR2_128764057.1 | 12697.4 | 221 |
| S20 |       | 140 | 2 | OAR2_116066653.1 | OAR2_127514723.1 | 11448.1 | 197 |
| S20 |       | 829 | 2 | OAR2_116066653.1 | OAR2_127514723.1 | 11448.1 | 197 |
| S20 |       | 27  | 2 | OAR2_115851252.1 | OAR2_129745095.1 | 13893.8 | 249 |
| S20 |       | 90  | 2 | s70568.1         | OAR2_127514723.1 | 15298.4 | 269 |
| S20 | CON   | 12  | 2 | OAR2_124098623.1 | OAR2_125967358.1 | 1868.73 | 42  |
| S20 | UNION | 12  | 2 | s70568.1         | OAR2_134940115.1 | 22723.8 | 429 |
|     |       |     |   |                  |                  |         |     |
| S23 |       | 606 | 2 | OAR2_122084961.1 | OAR2_123904873.1 | 1819.91 | 33  |
| S23 |       | 29  | 2 | OAR2_119004082.1 | OAR2_132080120.1 | 13076   | 229 |
| S23 |       | 702 | 2 | OAR2_117988490.1 | s16691.1         | 5544.96 | 79  |
| S23 |       | 126 | 2 | OAR2_116277389.1 | OAR2_134940115.1 | 18662.7 | 353 |
| S23 |       | 627 | 2 | OAR2_116277389.1 | OAR2_127514723.1 | 11237.3 | 193 |
| S23 |       | 629 | 2 | OAR2_116277389.1 | OAR2_127514723.1 | 11237.3 | 193 |
| S23 |       | 507 | 2 | OAR2_116277389.1 | s75747.1         | 10718   | 183 |
| S23 |       | 45  | 2 | OAR2_116066653.1 | OAR2_128764057.1 | 12697.4 | 221 |
| S23 |       | 140 | 2 | OAR2_116066653.1 | OAR2_127514723.1 | 11448.1 | 197 |
| S23 |       | 829 | 2 | OAR2_116066653.1 | OAR2_127514723.1 | 11448.1 | 197 |
| S23 |       | 27  | 2 | OAR2_115851252.1 | OAR2_129745095.1 | 13893.8 | 249 |
| S23 |       | 90  | 2 | s70568.1         | OAR2_127514723.1 | 15298.4 | 269 |
| S23 | CON   | 12  | 2 | OAR2_122084961.1 | s16691.1         | 1448.49 | 22  |
| S23 | UNION | 12  | 2 | s70568.1         | OAR2_134940115.1 | 22723.8 | 429 |
|     |       |     |   |                  |                  |         |     |
| S24 |       | 556 | 2 | OAR2_117362770.1 | s64230.1         | 1619.68 | 31  |
| S24 |       | 126 | 2 | OAR2_116277389.1 | OAR2_134940115.1 | 18662.7 | 353 |
| S24 |       | 627 | 2 | OAR2_116277389.1 | OAR2_127514723.1 | 11237.3 | 193 |
| S24 |       | 629 | 2 | OAR2_116277389.1 | OAR2_127514723.1 | 11237.3 | 193 |
| S24 |       | 507 | 2 | OAR2_116277389.1 | s75747.1         | 10718   | 183 |
| S24 |       | 45  | 2 | OAR2_116066653.1 | OAR2_128764057.1 | 12697.4 | 221 |
| S24 |       | 140 | 2 | OAR2_116066653.1 | OAR2_127514723.1 | 11448.1 | 197 |
| S24 |       | 829 | 2 | OAR2_116066653.1 | OAR2_127514723.1 | 11448.1 | 197 |
| S24 |       | 844 | 2 | OAR2_116066653.1 | OAR2_118831042.1 | 2764.39 | 56  |
| S24 |       | 27  | 2 | OAR2_115851252.1 | OAR2_129745095.1 | 13893.8 | 249 |
| S24 |       | 90  | 2 | s70568.1         | OAR2_127514723.1 | 15298.4 | 269 |
| S24 |       | 702 | 2 | OAR2_117988490.1 | s16691.1         | 5544.96 | 79  |
| S24 | CON   | 12  | 2 | OAR2_117988490.1 | OAR2_118831042.1 | 842.552 | 16  |
| S24 | UNION | 12  | 2 | s70568.1         | OAR2_134940115.1 | 22723.8 | 429 |
|     |       |     |   |                  |                  |         |     |
| S25 |       | 126 | 2 | OAR2_116277389.1 | OAR2_134940115.1 | 18662.7 | 353 |
| S25 |       | 627 | 2 | OAR2_116277389.1 | OAR2_127514723.1 | 11237.3 | 193 |
| S25 |       | 629 | 2 | OAR2_116277389.1 | OAR2_127514723.1 | 11237.3 | 193 |
| S25 |       | 507 | 2 | OAR2_116277389.1 | s75747.1         | 10718   | 183 |
| S25 |       | 45  | 2 | OAR2_116066653.1 | OAR2_128764057.1 | 12697.4 | 221 |
| S25 |       | 140 | 2 | OAR2_116066653.1 | OAR2_127514723.1 | 11448.1 | 197 |
| S25 |       | 829 | 2 | OAR2_116066653.1 | OAR2_127514723.1 | 11448.1 | 197 |
| S25 |       | 844 | 2 | OAR2_116066653.1 | OAR2_118831042.1 | 2764.39 | 56  |
| S25 |       | 27  | 2 | OAR2_115851252.1 | OAR2_129745095.1 | 13893.8 | 249 |
| S25 |       | 61  | 2 | OAR2_114908247.1 | OAR2_117156831.1 | 2248.58 | 55  |

|     |       |     |    |                    |                  |         |      |
|-----|-------|-----|----|--------------------|------------------|---------|------|
| S25 |       | 152 | 2  | s09491.1           | OAR2_116465453.1 | 2167.44 | 50   |
| S25 |       | 90  | 2  | s70568.1           | OAR2_127514723.1 | 15298.4 | 269  |
| S25 | CON   | 12  | 2  | OAR2_116277389.1   | OAR2_116465453.1 | 188.064 | 4    |
| S25 | UNION | 12  | 2  | s70568.1           | OAR2_134940115.1 | 22723.8 | 429  |
| S26 |       | 27  | 10 | OAR10_39377612.1   | OAR10_41227146.1 | 1849.53 | 37   |
| S26 |       | 90  | 10 | OAR10_39377612.1   | OAR10_41227146.1 | 1849.53 | 37   |
| S26 |       | 606 | 10 | OAR10_39377612.1   | OAR10_41174634.1 | 1797.02 | 36   |
| S26 |       | 556 | 10 | OAR10_37567308_X.1 | DU310747_445.1   | 3232.13 | 49   |
| S26 |       | 61  | 10 | OAR10_37517326.1   | OAR10_40747653.1 | 3230.33 | 50   |
| S26 |       | 49  | 10 | OAR10_37517326.1   | OAR10_40475642.1 | 2958.32 | 46   |
| S26 |       | 45  | 10 | OAR10_35722333.1   | OAR10_57396545.1 | 21674.2 | 405  |
| S26 |       | 123 | 10 | OAR10_35722333.1   | OAR10_41054879.1 | 5332.55 | 89   |
| S26 |       | 702 | 10 | s49567.1           | OAR10_48462141.1 | 48462.1 | 914  |
| S26 |       | 829 | 10 | OAR10_33047233.1   | OAR10_51969493.1 | 18922.3 | 352  |
| S26 |       | 801 | 10 | s38022.1           | OAR10_41435807.1 | 5825.97 | 101  |
| S26 | CON   | 11  | 10 | OAR10_39377612.1   | OAR10_40475642.1 | 1098.03 | 22   |
| S26 | UNION | 11  | 10 | s49567.1           | OAR10_57396545.1 | 57396.5 | 1095 |
| S27 |       | 126 | 22 | s11593.1           | OAR22_36686850.1 | 14557   | 280  |
| S27 |       | 29  | 22 | OAR22_21956630.1   | OAR22_31064768.1 | 9108.14 | 176  |
| S27 |       | 61  | 22 | OAR22_14956172.1   | s08672.1         | 23753.1 | 404  |
| S27 |       | 49  | 22 | OAR22_12868251.1   | OAR22_35805166.1 | 22936.9 | 381  |
| S27 |       | 702 | 22 | OAR22_9619017.1    | s61119.1         | 25865.1 | 434  |
| S27 |       | 801 | 22 | OAR22_31064768.1   | OAR22_33115630.1 | 2050.86 | 47   |
| S27 |       | 606 | 22 | OAR22_22756887.1   | OAR22_34014868.1 | 11258   | 219  |
| S27 |       | 627 | 22 | s05380.1           | OAR22_31098866.1 | 8673.81 | 167  |
| S27 |       | 629 | 22 | s05380.1           | OAR22_31098866.1 | 8673.81 | 167  |
| S27 |       | 507 | 22 | s06758.1           | OAR22_42355166.1 | 24436.4 | 466  |
| S27 | CON   | 10  | 22 | OAR22_31064768.1   | OAR22_31064768.1 | 0       | 1    |
| S27 | UNION | 10  | 22 | OAR22_9619017.1    | OAR22_42355166.1 | 32736.1 | 572  |
| S28 |       | 45  | 10 | OAR10_17232091.1   | s09543.1         | 3126.98 | 55   |
| S28 |       | 123 | 10 | OAR10_17232091.1   | OAR10_20247297.1 | 3015.21 | 54   |
| S28 |       | 90  | 10 | s33555.1           | OAR10_19765032.1 | 3415.2  | 59   |
| S28 |       | 27  | 10 | OAR10_16162080.1   | OAR10_19765032.1 | 3602.95 | 64   |
| S28 |       | 702 | 10 | s49567.1           | OAR10_48462141.1 | 48462.1 | 914  |
| S28 |       | 40  | 10 | OAR10_16100262.1   | OAR10_19558015.1 | 3457.75 | 62   |
| S28 |       | 157 | 10 | OAR10_16100262.1   | OAR10_19558015.1 | 3457.75 | 62   |
| S28 |       | 616 | 10 | OAR10_16100262.1   | OAR10_18818595.1 | 2718.33 | 48   |
| S28 |       | 507 | 10 | OAR10_15620012.1   | OAR10_19558015.1 | 3938    | 70   |
| S28 |       | 844 | 10 | OAR10_17703888.1   | s09622.1         | 13279.3 | 268  |
| S28 | CON   | 10  | 10 | OAR10_17703888.1   | OAR10_18818595.1 | 1114.71 | 19   |
| S28 | UNION | 10  | 10 | s49567.1           | OAR10_48462141.1 | 48462.1 | 914  |
| S31 |       | 27  | 1  | OAR1_126414415.1   | OAR1_138926518.1 | 12512.1 | 216  |
| S31 |       | 629 | 1  | OAR1_125784636.1   | OAR1_130654375.1 | 4869.74 | 56   |
| S31 |       | 627 | 1  | s03118.1           | OAR1_141731333.1 | 16512   | 283  |
| S31 |       | 45  | 1  | s37607.1           | s04671.1         | 16346.9 | 247  |
| S31 |       | 29  | 1  | OAR1_126268263.1   | s01965.1         | 6350.53 | 88   |
| S31 |       | 79  | 1  | s75317.1           | s66718.1         | 6978.38 | 93   |
| S31 |       | 702 | 1  | s14189.1           | s40751.1         | 42088.8 | 712  |
| S31 |       | 123 | 1  | s53597.1           | OAR1_153662211.1 | 35798.6 | 631  |
| S31 |       | 90  | 1  | OAR1_124078281.1   | OAR1_138926518.1 | 14848.2 | 257  |
| S31 |       | 616 | 1  | s01352.1           | OAR1_130649077.1 | 3160.47 | 30   |

|     |       |     |    |                    |                  |         |      |
|-----|-------|-----|----|--------------------|------------------|---------|------|
| S31 | CON   | 10  | 1  | s01352.1           | OAR1_130649077.1 | 3160.47 | 30   |
| S31 | UNION | 10  | 1  | s14189.1           | OAR1_153662211.1 | 45938.1 | 791  |
| S33 |       | 27  | 1  | OAR1_126414415.1   | OAR1_138926518.1 | 12512.1 | 216  |
| S33 |       | 629 | 1  | OAR1_125784636.1   | OAR1_130654375.1 | 4869.74 | 56   |
| S33 |       | 627 | 1  | s03118.1           | OAR1_141731333.1 | 16512   | 283  |
| S33 |       | 45  | 1  | s37607.1           | s04671.1         | 16346.9 | 247  |
| S33 |       | 90  | 1  | OAR1_124078281.1   | OAR1_138926518.1 | 14848.2 | 257  |
| S33 |       | 606 | 1  | OAR1_120032190.1   | s74762.1         | 6498.59 | 124  |
| S33 |       | 29  | 1  | OAR1_126268263.1   | s01965.1         | 6350.53 | 88   |
| S33 |       | 79  | 1  | s75317.1           | s66718.1         | 6978.38 | 93   |
| S33 |       | 702 | 1  | s14189.1           | s40751.1         | 42088.8 | 712  |
| S33 |       | 123 | 1  | s53597.1           | OAR1_153662211.1 | 35798.6 | 631  |
| S33 | CON   | 10  | 1  | OAR1_126414415.1   | s74762.1         | 116.364 | 3    |
| S33 | UNION | 10  | 1  | s14189.1           | OAR1_153662211.1 | 45938.1 | 791  |
| S35 |       | 556 | 10 | OAR10_37567308_X.1 | DU310747_445.1   | 3232.13 | 49   |
| S35 |       | 61  | 10 | OAR10_37517326.1   | OAR10_40747653.1 | 3230.33 | 50   |
| S35 |       | 49  | 10 | OAR10_37517326.1   | OAR10_40475642.1 | 2958.32 | 46   |
| S35 |       | 844 | 10 | s18518.1           | s35062.1         | 1609.48 | 32   |
| S35 |       | 45  | 10 | OAR10_35722333.1   | OAR10_57396545.1 | 21674.2 | 405  |
| S35 |       | 123 | 10 | OAR10_35722333.1   | OAR10_41054879.1 | 5332.55 | 89   |
| S35 |       | 702 | 10 | s49567.1           | OAR10_48462141.1 | 48462.1 | 914  |
| S35 |       | 829 | 10 | OAR10_33047233.1   | OAR10_51969493.1 | 18922.3 | 352  |
| S35 |       | 801 | 10 | s38022.1           | OAR10_41435807.1 | 5825.97 | 101  |
| S35 | CON   | 9   | 10 | OAR10_37567308_X.1 | s35062.1         | 119.095 | 4    |
| S35 | UNION | 9   | 10 | s49567.1           | OAR10_57396545.1 | 57396.5 | 1095 |
| S36 |       | 79  | 4  | OAR4_21951630.1    | OAR4_23831198.1  | 1879.57 | 43   |
| S36 |       | 157 | 4  | OAR4_21436345.1    | OAR4_23013880.1  | 1577.54 | 36   |
| S36 |       | 152 | 4  | OAR4_20468121.1    | OAR4_24841202.1  | 4373.08 | 92   |
| S36 |       | 123 | 4  | OAR4_19550445.1    | OAR4_22796537.1  | 3246.09 | 61   |
| S36 |       | 606 | 4  | OAR4_15211722_X.1  | OAR4_24841202.1  | 9629.48 | 193  |
| S36 |       | 702 | 4  | OARUn.284_293028.1 | OAR4_24251309.1  | 24251.3 | 470  |
| S36 |       | 49  | 4  | OAR4_22439455.1    | OAR4_29317435.1  | 6877.98 | 155  |
| S36 |       | 27  | 4  | OAR4_21073671.1    | OAR4_22765057.1  | 1691.39 | 37   |
| S36 |       | 616 | 4  | OAR4_22143169.1    | s60027.1         | 4198.5  | 90   |
| S36 | CON   | 9   | 4  | OAR4_22439455.1    | OAR4_22765057.1  | 325.602 | 7    |
| S36 | UNION | 9   | 4  | OARUn.284_293028.1 | OAR4_29317435.1  | 29317.4 | 582  |
| S37 |       | 616 | 4  | OAR4_22143169.1    | s60027.1         | 4198.5  | 90   |
| S37 |       | 844 | 4  | OAR4_20488468.1    | s32131.1         | 1894.04 | 35   |
| S37 |       | 123 | 4  | OAR4_19550445.1    | OAR4_22796537.1  | 3246.09 | 61   |
| S37 |       | 606 | 4  | OAR4_15211722_X.1  | OAR4_24841202.1  | 9629.48 | 193  |
| S37 |       | 702 | 4  | OARUn.284_293028.1 | OAR4_24251309.1  | 24251.3 | 470  |
| S37 |       | 79  | 4  | OAR4_21951630.1    | OAR4_23831198.1  | 1879.57 | 43   |
| S37 |       | 157 | 4  | OAR4_21436345.1    | OAR4_23013880.1  | 1577.54 | 36   |
| S37 |       | 152 | 4  | OAR4_20468121.1    | OAR4_24841202.1  | 4373.08 | 92   |
| S37 |       | 27  | 4  | OAR4_21073671.1    | OAR4_22765057.1  | 1691.39 | 37   |
| S37 | CON   | 9   | 4  | OAR4_22143169.1    | s32131.1         | 239.337 | 7    |
| S37 | UNION | 9   | 4  | OARUn.284_293028.1 | s60027.1         | 26341.7 | 510  |
| S39 |       | 606 | 3  | s14975.1           | OAR3_47755179.1  | 3083.7  | 63   |
| S39 |       | 627 | 3  | OAR3_44553219.1    | OAR3_46866444.1  | 2313.22 | 46   |
| S39 |       | 629 | 3  | OAR3_44553219.1    | OAR3_46866444.1  | 2313.22 | 46   |

|     |       |     |    |                  |                    |         |      |
|-----|-------|-----|----|------------------|--------------------|---------|------|
| S39 |       | 123 | 3  | s72091.1         | s14476.1           | 1854.07 | 41   |
| S39 |       | 507 | 3  | OAR3_43871305.1  | OAR3_52722619.1    | 8851.31 | 160  |
| S39 |       | 49  | 3  | OAR3_43700480.1  | OAR3_50145205.1    | 6444.73 | 118  |
| S39 |       | 702 | 3  | DU259120_464.1   | OAR3_59494261.1    | 59494.3 | 1111 |
| S39 |       | 27  | 3  | s12024.1         | s69330.1           | 4167.98 | 82   |
| S39 |       | 152 | 3  | OAR3_44553219.1  | OAR3_50718262.1    | 6165.04 | 110  |
| S39 | CON   | 9   | 3  | s14975.1         | s69330.1           | 476.074 | 10   |
| S39 | UNION | 9   | 3  | DU259120_464.1   | OAR3_59494261.1    | 59494.3 | 1111 |
|     |       |     |    |                  |                    |         |      |
| S40 |       | 126 | 22 | s11593.1         | OAR22_36686850.1   | 14557   | 280  |
| S40 |       | 61  | 22 | OAR22_14956172.1 | s08672.1           | 23753.1 | 404  |
| S40 |       | 49  | 22 | OAR22_12868251.1 | OAR22_35805166.1   | 22936.9 | 381  |
| S40 |       | 702 | 22 | OAR22_9619017.1  | s61119.1           | 25865.1 | 434  |
| S40 |       | 40  | 22 | OAR22_35331669.1 | s59235.1           | 1809.49 | 33   |
| S40 |       | 616 | 22 | s00078.1         | OAR22_36946295.1   | 2082.21 | 36   |
| S40 |       | 90  | 22 | OAR22_33247933.1 | s39603.1           | 3305.97 | 57   |
| S40 |       | 507 | 22 | s06758.1         | OAR22_42355166.1   | 24436.4 | 466  |
| S40 | CON   | 8   | 22 | OAR22_35331669.1 | s61119.1           | 152.415 | 6    |
| S40 | UNION | 8   | 22 | OAR22_9619017.1  | OAR22_42355166.1   | 32736.1 | 572  |
|     |       |     |    |                  |                    |         |      |
| S41 |       | 126 | 22 | s11593.1         | OAR22_36686850.1   | 14557   | 280  |
| S41 |       | 61  | 22 | OAR22_14956172.1 | s08672.1           | 23753.1 | 404  |
| S41 |       | 49  | 22 | OAR22_12868251.1 | OAR22_35805166.1   | 22936.9 | 381  |
| S41 |       | 702 | 22 | OAR22_9619017.1  | s61119.1           | 25865.1 | 434  |
| S41 |       | 90  | 22 | OAR22_33247933.1 | s39603.1           | 3305.97 | 57   |
| S41 |       | 123 | 22 | OAR22_31412009.1 | OAR22_33642320.1   | 2230.31 | 47   |
| S41 |       | 606 | 22 | OAR22_22756887.1 | OAR22_34014868.1   | 11258   | 219  |
| S41 |       | 507 | 22 | s06758.1         | OAR22_42355166.1   | 24436.4 | 466  |
| S41 | CON   | 8   | 22 | OAR22_33247933.1 | OAR22_33642320.1   | 394.387 | 9    |
| S41 | UNION | 8   | 22 | OAR22_9619017.1  | OAR22_42355166.1   | 32736.1 | 572  |
|     |       |     |    |                  |                    |         |      |
| S42 |       | 126 | 22 | s11593.1         | OAR22_36686850.1   | 14557   | 280  |
| S42 |       | 61  | 22 | OAR22_14956172.1 | s08672.1           | 23753.1 | 404  |
| S42 |       | 49  | 22 | OAR22_12868251.1 | OAR22_35805166.1   | 22936.9 | 381  |
| S42 |       | 702 | 22 | OAR22_9619017.1  | s61119.1           | 25865.1 | 434  |
| S42 |       | 123 | 22 | OAR22_31412009.1 | OAR22_33642320.1   | 2230.31 | 47   |
| S42 |       | 606 | 22 | OAR22_22756887.1 | OAR22_34014868.1   | 11258   | 219  |
| S42 |       | 507 | 22 | s06758.1         | OAR22_42355166.1   | 24436.4 | 466  |
| S42 |       | 801 | 22 | OAR22_31064768.1 | OAR22_33115630.1   | 2050.86 | 47   |
| S42 | CON   | 8   | 22 | OAR22_31412009.1 | OAR22_33115630.1   | 1703.62 | 37   |
| S42 | UNION | 8   | 22 | OAR22_9619017.1  | OAR22_42355166.1   | 32736.1 | 572  |
|     |       |     |    |                  |                    |         |      |
| S46 |       | 61  | 22 | OAR22_14956172.1 | s08672.1           | 23753.1 | 404  |
| S46 |       | 49  | 22 | OAR22_12868251.1 | OAR22_35805166.1   | 22936.9 | 381  |
| S46 |       | 702 | 22 | OAR22_9619017.1  | s61119.1           | 25865.1 | 434  |
| S46 |       | 627 | 22 | DU413316_575.1   | OAR22_20826797.1   | 5462.35 | 55   |
| S46 |       | 629 | 22 | DU413316_575.1   | OAR22_20826797.1   | 5462.35 | 55   |
| S46 |       | 90  | 22 | OAR22_13734855.1 | s32720.1           | 4933.37 | 51   |
| S46 |       | 123 | 22 | OAR22_17622066.1 | OAR22_28097363.1   | 10475.3 | 179  |
| S46 |       | 507 | 22 | s06758.1         | OAR22_42355166.1   | 24436.4 | 466  |
| S46 | CON   | 8   | 22 | s06758.1         | s32720.1           | 749.48  | 18   |
| S46 | UNION | 8   | 22 | OAR22_9619017.1  | OAR22_42355166.1   | 32736.1 | 572  |
|     |       |     |    |                  |                    |         |      |
| S55 |       | 29  | 18 | s42732.1         | OAR18_49121315_X.1 | 4279.05 | 76   |
| S55 |       | 27  | 18 | s42732.1         | s05118.1           | 3781.96 | 66   |

|     |       |     |    |                    |                    |         |     |
|-----|-------|-----|----|--------------------|--------------------|---------|-----|
| S55 |       | 45  | 18 | s42732.1           | OAR18_47151307.1   | 2309.04 | 40  |
| S55 |       | 629 | 18 | OAR18_44175536.1   | OAR18_48788444.1   | 4612.91 | 80  |
| S55 |       | 627 | 18 | OAR18_44175536.1   | s05118.1           | 4448.69 | 77  |
| S55 |       | 507 | 18 | DU434490_494.1     | OAR18_45912887.1   | 9548.61 | 163 |
| S55 |       | 123 | 18 | OAR18_42732877.1   | OAR18_45912887.1   | 3180.01 | 58  |
| S55 |       | 702 | 18 | OAR18_43012559.1   | OAR18_45763732.1   | 2751.17 | 46  |
| S55 | CON   | 8   | 18 | s42732.1           | OAR18_45763732.1   | 921.469 | 14  |
| S55 | UNION | 8   | 18 | DU434490_494.1     | OAR18_49121315_X.1 | 12757   | 222 |
|     |       |     |    |                    |                    |         |     |
| S59 |       | 40  | 11 | s45020.1           | OAR11_29271153.1   | 2783.73 | 30  |
| S59 |       | 507 | 11 | s58684.1           | OAR11_29271153.1   | 3251.87 | 35  |
| S59 |       | 79  | 11 | s21891.1           | OAR11_26956590.1   | 2019.1  | 35  |
| S59 |       | 61  | 11 | OAR11_24444900_X.1 | s51636.1           | 3113.63 | 49  |
| S59 |       | 90  | 11 | s08572.1           | OAR11_30551868.1   | 7951.23 | 122 |
| S59 |       | 123 | 11 | s17310.1           | OAR11_29271153.1   | 9483.93 | 143 |
| S59 |       | 702 | 11 | OAR11_17172323.1   | OAR11_33359712.1   | 16187.4 | 260 |
| S59 |       | 27  | 11 | s04627.1           | s73325.1           | 5587.46 | 73  |
| S59 | CON   | 8   | 11 | s45020.1           | OAR11_26956590.1   | 469.17  | 9   |
| S59 | UNION | 8   | 11 | OAR11_17172323.1   | OAR11_33359712.1   | 16187.4 | 260 |
|     |       |     |    |                    |                    |         |     |
| S64 |       | 152 | 8  | OAR8_31142913.1    | s09657.1           | 2031.21 | 41  |
| S64 |       | 829 | 8  | OAR8_30120504.1    | OAR8_31515043.1    | 1394.54 | 32  |
| S64 |       | 27  | 8  | OAR8_29706230.1    | s32939.1           | 3476.82 | 69  |
| S64 |       | 40  | 8  | OAR8_29706230.1    | OAR8_31515043.1    | 1808.81 | 38  |
| S64 |       | 123 | 8  | OAR8_29706230.1    | OAR8_31515043.1    | 1808.81 | 38  |
| S64 |       | 126 | 8  | s69453.1           | s50983.1           | 4232.26 | 88  |
| S64 |       | 140 | 8  | OAR8_26330799.1    | OAR8_31515043.1    | 5184.24 | 103 |
| S64 |       | 702 | 8  | OAR8_26793121.1    | OAR8_38710483.1    | 11917.4 | 231 |
| S64 | CON   | 8   | 8  | OAR8_31142913.1    | OAR8_31515043.1    | 372.13  | 11  |
| S64 | UNION | 8   | 8  | OAR8_26330799.1    | OAR8_38710483.1    | 12379.7 | 239 |
|     |       |     |    |                    |                    |         |     |
| S65 |       | 627 | 7  | s18070.1           | OAR7_60745094.1    | 1667.64 | 32  |
| S65 |       | 629 | 7  | s18070.1           | OAR7_60745094.1    | 1667.64 | 32  |
| S65 |       | 152 | 7  | s18070.1           | OAR7_60704536.1    | 1627.09 | 31  |
| S65 |       | 801 | 7  | OAR7_57790006.1    | OAR7_60473904.1    | 2683.9  | 54  |
| S65 |       | 507 | 7  | OAR7_52043940.1    | OAR7_71832636.1    | 19788.7 | 355 |
| S65 |       | 702 | 7  | OAR7_31685912.1    | OAR7_72973471.1    | 41287.6 | 769 |
| S65 |       | 616 | 7  | OAR7_54780217.1    | s36119.1           | 5323.48 | 103 |
| S65 |       | 29  | 7  | OAR7_56240366.1    | OAR7_77667178.1    | 21426.8 | 390 |
| S65 | CON   | 8   | 7  | s18070.1           | s36119.1           | 1026.25 | 20  |
| S65 | UNION | 8   | 7  | OAR7_31685912.1    | OAR7_77667178.1    | 45981.3 | 865 |
|     |       |     |    |                    |                    |         |     |
| S71 |       | 140 | 6  | s73122.1           | OAR6_49463357.1    | 26607.7 | 513 |
| S71 |       | 157 | 6  | OAR6_22462972.1    | OAR6_23771578.1    | 1308.61 | 31  |
| S71 |       | 45  | 6  | OAR6_21027868.1    | OAR6_27183957.1    | 6156.09 | 126 |
| S71 |       | 123 | 6  | OAR6_20508343.1    | OAR6_23771578.1    | 3263.24 | 67  |
| S71 |       | 844 | 6  | OAR6_23745238.1    | s22136.1           | 3223.9  | 68  |
| S71 |       | 90  | 6  | OAR6_21784995.1    | OAR6_26043279.1    | 4258.28 | 85  |
| S71 |       | 702 | 6  | OAR6_6278702.1     | OAR6_45273992.1    | 38995.3 | 741 |
| S71 |       | 507 | 6  | OAR6_22984954_X.1  | s20604.1           | 1805.52 | 41  |
| S71 | CON   | 8   | 6  | OAR6_23745238.1    | OAR6_23771578.1    | 26.34   | 2   |
| S71 | UNION | 8   | 6  | OAR6_6278702.1     | OAR6_49463357.1    | 43184.7 | 833 |
|     |       |     |    |                    |                    |         |     |
| S76 |       | 507 | 6  | s21329.1           | OAR6_10484730.1    | 2028.35 | 45  |
| S76 |       | 627 | 6  | s21329.1           | OAR6_10118858.1    | 1662.48 | 34  |

|     |       |     |   |                    |                   |         |     |
|-----|-------|-----|---|--------------------|-------------------|---------|-----|
| S76 |       | 629 | 6 | OAR6_6949639.1     | OAR6_10118858.1   | 3169.22 | 52  |
| S76 |       | 45  | 6 | OAR6_6211452.1     | OAR6_10161100.1   | 3949.65 | 69  |
| S76 |       | 29  | 6 | OAR6_9971239.1     | OAR6_13482553.1   | 3511.31 | 71  |
| S76 |       | 123 | 6 | s48564.1           | OAR6_14540611.1   | 5855.93 | 118 |
| S76 |       | 152 | 6 | OAR6_6254316.1     | OAR6_10305227.1   | 4050.91 | 72  |
| S76 |       | 702 | 6 | OAR6_6278702.1     | OAR6_45273992.1   | 38995.3 | 741 |
| S76 | CON   | 8   | 6 | OAR6_9971239.1     | OAR6_10118858.1   | 147.619 | 4   |
| S76 | UNION | 8   | 6 | OAR6_6211452.1     | OAR6_45273992.1   | 39062.5 | 743 |
| S77 |       | 507 | 6 | s21329.1           | OAR6_10484730.1   | 2028.35 | 45  |
| S77 |       | 627 | 6 | s21329.1           | OAR6_10118858.1   | 1662.48 | 34  |
| S77 |       | 629 | 6 | OAR6_6949639.1     | OAR6_10118858.1   | 3169.22 | 52  |
| S77 |       | 45  | 6 | OAR6_6211452.1     | OAR6_10161100.1   | 3949.65 | 69  |
| S77 |       | 90  | 6 | OAR6_4458962.1     | s44871.1          | 4179.72 | 70  |
| S77 |       | 152 | 6 | OAR6_6254316.1     | OAR6_10305227.1   | 4050.91 | 72  |
| S77 |       | 79  | 6 | s40472.1           | s30534.1          | 2475.33 | 38  |
| S77 |       | 702 | 6 | OAR6_6278702.1     | OAR6_45273992.1   | 38995.3 | 741 |
| S77 | CON   | 8   | 6 | s21329.1           | s30534.1          | 50.785  | 2   |
| S77 | UNION | 8   | 6 | OAR6_4458962.1     | OAR6_45273992.1   | 40815   | 774 |
| S78 |       | 79  | 5 | OAR5_57265711.1    | s17800.1          | 9271.25 | 138 |
| S78 |       | 157 | 5 | OAR5_57173649.1    | OAR5_58968886.1   | 1795.24 | 31  |
| S78 |       | 829 | 5 | s00980.1           | OAR5_59243774.1   | 5486.89 | 100 |
| S78 |       | 152 | 5 | s12940.1           | OAR5_61924626.1   | 14110.5 | 253 |
| S78 |       | 629 | 5 | OAR5_57983508.1    | OAR5_71824766.1   | 13841.3 | 230 |
| S78 |       | 627 | 5 | OAR5_57983508.1    | OAR5_66325807.1   | 8342.3  | 120 |
| S78 |       | 140 | 5 | OAR5_52351898.1    | OAR5_58830573.1   | 6478.68 | 118 |
| S78 |       | 29  | 5 | s54250.1           | OAR5_58587196.1   | 3259.14 | 61  |
| S78 | CON   | 8   | 5 | OAR5_57983508.1    | OAR5_58587196.1   | 603.688 | 9   |
| S78 | UNION | 8   | 5 | s12940.1           | OAR5_71824766.1   | 24010.7 | 431 |
| S82 |       | 27  | 4 | OAR4_73050615.1    | OAR4_74539177.1   | 1488.56 | 31  |
| S82 |       | 507 | 4 | OAR4_73050615.1    | OAR4_74539177.1   | 1488.56 | 31  |
| S82 |       | 79  | 4 | OAR4_72150069.1    | OAR4_73570548.1   | 1420.48 | 30  |
| S82 |       | 140 | 4 | s43361.1           | OAR4_74243219.1   | 2138.92 | 42  |
| S82 |       | 616 | 4 | OAR4_72367529.1    | OAR4_78991289.1   | 6623.76 | 132 |
| S82 |       | 49  | 4 | OAR4_72367529.1    | OAR4_74539177.1   | 2171.65 | 43  |
| S82 |       | 702 | 4 | s58367.1           | OAR4_85483475.1   | 25992.5 | 514 |
| S82 |       | 627 | 4 | OAR4_70656759_X.1  | s13803.1          | 5088.69 | 101 |
| S82 | CON   | 8   | 4 | OAR4_73050615.1    | OAR4_73570548.1   | 519.933 | 14  |
| S82 | UNION | 8   | 4 | s58367.1           | OAR4_85483475.1   | 25992.5 | 514 |
| S83 |       | 29  | 4 | OAR4_24184274.1    | OAR4_27320940_X.1 | 3136.67 | 66  |
| S83 |       | 126 | 4 | OAR4_23761592.1    | OAR4_26211342.1   | 2449.75 | 51  |
| S83 |       | 616 | 4 | OAR4_22143169.1    | s60027.1          | 4198.5  | 90  |
| S83 |       | 606 | 4 | OAR4_15211722_X.1  | OAR4_24841202.1   | 9629.48 | 193 |
| S83 |       | 702 | 4 | OARUn.284_293028.1 | OAR4_24251309.1   | 24251.3 | 470 |
| S83 |       | 801 | 4 | OAR4_23416069_X.1  | s49069.1          | 1172.73 | 30  |
| S83 |       | 49  | 4 | OAR4_22439455.1    | OAR4_29317435.1   | 6877.98 | 155 |
| S83 |       | 152 | 4 | OAR4_20468121.1    | OAR4_24841202.1   | 4373.08 | 92  |
| S83 | CON   | 8   | 4 | OAR4_24184274.1    | OAR4_24251309.1   | 67.035  | 3   |
| S83 | UNION | 8   | 4 | OARUn.284_293028.1 | OAR4_29317435.1   | 29317.4 | 582 |
| S84 |       | 79  | 4 | OAR4_21951630.1    | OAR4_23831198.1   | 1879.57 | 43  |
| S84 |       | 152 | 4 | OAR4_20468121.1    | OAR4_24841202.1   | 4373.08 | 92  |



|     |       |     |   |                    |                    |         |      |
|-----|-------|-----|---|--------------------|--------------------|---------|------|
| S84 |       | 606 | 4 | OAR4_15211722_X.1  | OAR4_24841202.1    | 9629.48 | 193  |
| S84 |       | 702 | 4 | OARUn.284_293028.1 | OAR4_24251309.1    | 24251.3 | 470  |
| S84 |       | 126 | 4 | OAR4_23761592.1    | OAR4_26211342.1    | 2449.75 | 51   |
| S84 |       | 616 | 4 | OAR4_22143169.1    | s60027.1           | 4198.5  | 90   |
| S84 |       | 801 | 4 | OAR4_23416069_X.1  | s49069.1           | 1172.73 | 30   |
| S84 |       | 49  | 4 | OAR4_22439455.1    | OAR4_29317435.1    | 6877.98 | 155  |
| S84 | CON   | 8   | 4 | OAR4_23761592.1    | OAR4_23831198.1    | 69.606  | 3    |
| S84 | UNION | 8   | 4 | OARUn.284_293028.1 | OAR4_29317435.1    | 29317.4 | 582  |
|     |       |     |   |                    |                    |         |      |
| S86 |       | 157 | 4 | OAR4_21436345.1    | OAR4_23013880.1    | 1577.54 | 36   |
| S86 |       | 844 | 4 | OAR4_20488468.1    | s32131.1           | 1894.04 | 35   |
| S86 |       | 152 | 4 | OAR4_20468121.1    | OAR4_24841202.1    | 4373.08 | 92   |
| S86 |       | 123 | 4 | OAR4_19550445.1    | OAR4_22796537.1    | 3246.09 | 61   |
| S86 |       | 606 | 4 | OAR4_15211722_X.1  | OAR4_24841202.1    | 9629.48 | 193  |
| S86 |       | 702 | 4 | OARUn.284_293028.1 | OAR4_24251309.1    | 24251.3 | 470  |
| S86 |       | 507 | 4 | OAR4_19140942_X.1  | OAR4_21780546.1    | 2639.6  | 46   |
| S86 |       | 27  | 4 | OAR4_21073671.1    | OAR4_22765057.1    | 1691.39 | 37   |
| S86 | CON   | 8   | 4 | OAR4_21436345.1    | OAR4_21780546.1    | 344.201 | 9    |
| S86 | UNION | 8   | 4 | OARUn.284_293028.1 | OAR4_24841202.1    | 24841.2 | 483  |
|     |       |     |   |                    |                    |         |      |
| S87 |       | 844 | 4 | OAR4_20488468.1    | s32131.1           | 1894.04 | 35   |
| S87 |       | 123 | 4 | OAR4_19550445.1    | OAR4_22796537.1    | 3246.09 | 61   |
| S87 |       | 606 | 4 | OAR4_15211722_X.1  | OAR4_24841202.1    | 9629.48 | 193  |
| S87 |       | 702 | 4 | OARUn.284_293028.1 | OAR4_24251309.1    | 24251.3 | 470  |
| S87 |       | 27  | 4 | OAR4_21073671.1    | OAR4_22765057.1    | 1691.39 | 37   |
| S87 |       | 152 | 4 | OAR4_20468121.1    | OAR4_24841202.1    | 4373.08 | 92   |
| S87 |       | 507 | 4 | OAR4_19140942_X.1  | OAR4_21780546.1    | 2639.6  | 46   |
| S87 |       | 29  | 4 | s70520.1           | OAR4_21300620.1    | 4951.68 | 88   |
| S87 | CON   | 8   | 4 | OAR4_21073671.1    | OAR4_21300620.1    | 226.949 | 6    |
| S87 | UNION | 8   | 4 | OARUn.284_293028.1 | OAR4_24841202.1    | 24841.2 | 483  |
|     |       |     |   |                    |                    |         |      |
| S89 |       | 507 | 3 | OAR3_179244393.1   | OAR3_211362922_X.1 | 32118.5 | 604  |
| S89 |       | 29  | 3 | OAR3_179244393.1   | s26854.1           | 4664.94 | 91   |
| S89 |       | 606 | 3 | OAR3_177909045.1   | s26854.1           | 6000.29 | 115  |
| S89 |       | 90  | 3 | s41165.1           | OAR3_184630061.1   | 1768.08 | 33   |
| S89 |       | 702 | 3 | OAR3_178121896.1   | s16918.1           | 11927   | 230  |
| S89 |       | 45  | 3 | OAR3_183605277.1   | s52959.1           | 3069.59 | 58   |
| S89 |       | 61  | 3 | s38401.1           | OAR3_183605277.1   | 2795.96 | 51   |
| S89 |       | 844 | 3 | OAR3_182939964.1   | OAR3_186988175.1   | 4048.21 | 73   |
| S89 | CON   | 8   | 3 | OAR3_183605277.1   | OAR3_183605277.1   | 0       | 1    |
| S89 | UNION | 8   | 3 | OAR3_177909045.1   | OAR3_211362922_X.1 | 33453.9 | 628  |
|     |       |     |   |                    |                    |         |      |
| S93 |       | 507 | 3 | OAR3_43871305.1    | OAR3_52722619.1    | 8851.31 | 160  |
| S93 |       | 49  | 3 | OAR3_43700480.1    | OAR3_50145205.1    | 6444.73 | 118  |
| S93 |       | 627 | 3 | OAR3_44553219.1    | OAR3_46866444.1    | 2313.22 | 46   |
| S93 |       | 629 | 3 | OAR3_44553219.1    | OAR3_46866444.1    | 2313.22 | 46   |
| S93 |       | 702 | 3 | DU259120_464.1     | OAR3_59494261.1    | 59494.3 | 1111 |
| S93 |       | 152 | 3 | OAR3_44553219.1    | OAR3_50718262.1    | 6165.04 | 110  |
| S93 |       | 606 | 3 | s14975.1           | OAR3_47755179.1    | 3083.7  | 63   |
| S93 |       | 45  | 3 | OAR3_45905654.1    | OAR3_47595933.1    | 1690.28 | 35   |
| S93 | CON   | 8   | 3 | OAR3_45905654.1    | OAR3_46866444.1    | 960.79  | 19   |
| S93 | UNION | 8   | 3 | DU259120_464.1     | OAR3_59494261.1    | 59494.3 | 1111 |
|     |       |     |   |                    |                    |         |      |
| S94 |       | 556 | 2 | OAR2_238010227.1   | OAR2_240388073.1   | 2377.85 | 48   |
| S94 |       | 123 | 2 | OAR2_235417778.1   | OAR2_244336911.1   | 8919.13 | 185  |

|      |       |     |   |                  |                  |         |     |
|------|-------|-----|---|------------------|------------------|---------|-----|
| S94  |       | 507 | 2 | OAR2_234395013.1 | OAR2_240388073.1 | 5993.06 | 127 |
| S94  |       | 627 | 2 | OAR2_238165550.1 | OAR2_246045571.1 | 7880.02 | 156 |
| S94  |       | 629 | 2 | OAR2_238165550.1 | OAR2_241065735.1 | 2900.18 | 59  |
| S94  |       | 79  | 2 | OAR2_236034019.1 | OAR2_241969339.1 | 5935.32 | 125 |
| S94  |       | 61  | 2 | OAR2_239847244.1 | OAR2_242019441.1 | 2172.2  | 44  |
| S94  |       | 29  | 2 | OAR2_238444943.1 | s43939.1         | 16224.6 | 314 |
| S94  | CON   | 8   | 2 | OAR2_239847244.1 | OAR2_240388073.1 | 540.829 | 11  |
| S94  | UNION | 8   | 2 | OAR2_234395013.1 | s43939.1         | 20274.5 | 401 |
|      |       |     |   |                  |                  |         |     |
| S95  |       | 627 | 2 | OAR2_238165550.1 | OAR2_246045571.1 | 7880.02 | 156 |
| S95  |       | 629 | 2 | OAR2_238165550.1 | OAR2_241065735.1 | 2900.18 | 59  |
| S95  |       | 556 | 2 | OAR2_238010227.1 | OAR2_240388073.1 | 2377.85 | 48  |
| S95  |       | 79  | 2 | OAR2_236034019.1 | OAR2_241969339.1 | 5935.32 | 125 |
| S95  |       | 123 | 2 | OAR2_235417778.1 | OAR2_244336911.1 | 8919.13 | 185 |
| S95  |       | 507 | 2 | OAR2_234395013.1 | OAR2_240388073.1 | 5993.06 | 127 |
| S95  |       | 29  | 2 | OAR2_238444943.1 | s43939.1         | 16224.6 | 314 |
| S95  |       | 45  | 2 | OAR2_235533135.1 | DU260201_585.1   | 2944.56 | 66  |
| S95  | CON   | 8   | 2 | OAR2_238444943.1 | DU260201_585.1   | 32.748  | 2   |
| S95  | UNION | 8   | 2 | OAR2_234395013.1 | s43939.1         | 20274.5 | 401 |
|      |       |     |   |                  |                  |         |     |
| S96  |       | 507 | 2 | OAR2_134615652.1 | OAR2_136209364.1 | 1593.71 | 30  |
| S96  |       | 90  | 2 | s72460.1         | OAR2_136209364.1 | 1755.22 | 34  |
| S96  |       | 140 | 2 | s72460.1         | OAR2_136086521.1 | 1632.38 | 32  |
| S96  |       | 29  | 2 | OAR2_132531523.1 | OAR2_136140871.1 | 3609.35 | 80  |
| S96  |       | 616 | 2 | OAR2_129409414.1 | OAR2_135326401.1 | 5916.99 | 129 |
| S96  |       | 123 | 2 | OAR2_128971562.1 | OAR2_135421095.1 | 6449.53 | 141 |
| S96  |       | 61  | 2 | OAR2_126263077.1 | OAR2_134940115.1 | 8677.04 | 181 |
| S96  |       | 126 | 2 | OAR2_116277389.1 | OAR2_134940115.1 | 18662.7 | 353 |
| S96  | CON   | 8   | 2 | OAR2_134615652.1 | OAR2_134940115.1 | 324.463 | 7   |
| S96  | UNION | 8   | 2 | OAR2_116277389.1 | OAR2_136209364.1 | 19932   | 376 |
|      |       |     |   |                  |                  |         |     |
| S97  |       | 29  | 2 | OAR2_132531523.1 | OAR2_136140871.1 | 3609.35 | 80  |
| S97  |       | 45  | 2 | OAR2_130020916.1 | OAR2_133530461.1 | 3509.55 | 78  |
| S97  |       | 616 | 2 | OAR2_129409414.1 | OAR2_135326401.1 | 5916.99 | 129 |
| S97  |       | 123 | 2 | OAR2_128971562.1 | OAR2_135421095.1 | 6449.53 | 141 |
| S97  |       | 507 | 2 | s20121.1         | OAR2_134249434.1 | 7112.48 | 154 |
| S97  |       | 844 | 2 | s20121.1         | OAR2_133793734.1 | 6656.78 | 145 |
| S97  |       | 61  | 2 | OAR2_126263077.1 | OAR2_134940115.1 | 8677.04 | 181 |
| S97  |       | 126 | 2 | OAR2_116277389.1 | OAR2_134940115.1 | 18662.7 | 353 |
| S97  | CON   | 8   | 2 | OAR2_132531523.1 | OAR2_133530461.1 | 998.938 | 28  |
| S97  | UNION | 8   | 2 | OAR2_116277389.1 | OAR2_136140871.1 | 19863.5 | 375 |
|      |       |     |   |                  |                  |         |     |
| S99  |       | 45  | 2 | OAR2_130020916.1 | OAR2_133530461.1 | 3509.55 | 78  |
| S99  |       | 616 | 2 | OAR2_129409414.1 | OAR2_135326401.1 | 5916.99 | 129 |
| S99  |       | 123 | 2 | OAR2_128971562.1 | OAR2_135421095.1 | 6449.53 | 141 |
| S99  |       | 507 | 2 | s20121.1         | OAR2_134249434.1 | 7112.48 | 154 |
| S99  |       | 844 | 2 | s20121.1         | OAR2_133793734.1 | 6656.78 | 145 |
| S99  |       | 61  | 2 | OAR2_126263077.1 | OAR2_134940115.1 | 8677.04 | 181 |
| S99  |       | 29  | 2 | OAR2_119004082.1 | OAR2_132080120.1 | 13076   | 229 |
| S99  |       | 126 | 2 | OAR2_116277389.1 | OAR2_134940115.1 | 18662.7 | 353 |
| S99  | CON   | 8   | 2 | OAR2_130020916.1 | OAR2_132080120.1 | 2059.2  | 40  |
| S99  | UNION | 8   | 2 | OAR2_116277389.1 | OAR2_135421095.1 | 19143.7 | 362 |
|      |       |     |   |                  |                  |         |     |
| S100 |       | 616 | 2 | OAR2_129409414.1 | OAR2_135326401.1 | 5916.99 | 129 |
| S100 |       | 123 | 2 | OAR2_128971562.1 | OAR2_135421095.1 | 6449.53 | 141 |

|      |       |     |    |                  |                  |         |     |
|------|-------|-----|----|------------------|------------------|---------|-----|
| S100 |       | 507 | 2  | s20121.1         | OAR2_134249434.1 | 7112.48 | 154 |
| S100 |       | 844 | 2  | s20121.1         | OAR2_133793734.1 | 6656.78 | 145 |
| S100 |       | 61  | 2  | OAR2_126263077.1 | OAR2_134940115.1 | 8677.04 | 181 |
| S100 |       | 29  | 2  | OAR2_119004082.1 | OAR2_132080120.1 | 13076   | 229 |
| S100 |       | 126 | 2  | OAR2_116277389.1 | OAR2_134940115.1 | 18662.7 | 353 |
| S100 |       | 27  | 2  | OAR2_115851252.1 | OAR2_129745095.1 | 13893.8 | 249 |
| S100 | CON   | 8   | 2  | OAR2_129409414.1 | OAR2_129745095.1 | 335.681 | 8   |
| S100 | UNION | 8   | 2  | OAR2_115851252.1 | OAR2_135421095.1 | 19569.8 | 372 |
|      |       |     |    |                  |                  |         |     |
| S101 |       | 844 | 2  | OAR2_63699523.1  | s38855.1         | 1651.43 | 37  |
| S101 |       | 123 | 2  | OAR2_63165309.1  | s38855.1         | 2185.64 | 46  |
| S101 |       | 61  | 2  | OAR2_63165309.1  | s38855.1         | 2185.64 | 46  |
| S101 |       | 49  | 2  | OAR2_61907594.1  | OAR2_74652390.1  | 12744.8 | 265 |
| S101 |       | 40  | 2  | OAR2_63943896.1  | s59858.1         | 2994.2  | 62  |
| S101 |       | 29  | 2  | OAR2_63911376.1  | OAR2_66880170.1  | 2968.79 | 62  |
| S101 |       | 507 | 2  | OAR2_63911376.1  | OAR2_65914681.1  | 2003.31 | 43  |
| S101 |       | 556 | 2  | OAR2_62824297.1  | OAR2_64484840.1  | 1660.54 | 36  |
| S101 | CON   | 8   | 2  | OAR2_63943896.1  | OAR2_64484840.1  | 540.944 | 13  |
| S101 | UNION | 8   | 2  | OAR2_61907594.1  | OAR2_74652390.1  | 12744.8 | 265 |
|      |       |     |    |                  |                  |         |     |
| S102 |       | 702 | 22 | OAR22_5872287.1  | OAR22_7511031.1  | 1638.74 | 34  |
| S102 |       | 152 | 22 | OAR22_5771792.1  | OAR22_7804834.1  | 2033.04 | 41  |
| S102 |       | 45  | 22 | OAR22_5711915.1  | OAR22_8033581.1  | 2321.67 | 47  |
| S102 |       | 507 | 22 | s68573.1         | OAR22_8623862.1  | 8623.86 | 128 |
| S102 |       | 126 | 22 | OAR22_1250324.1  | OAR22_7588884.1  | 6338.56 | 102 |
| S102 |       | 27  | 22 | OAR22_7348996.1  | OAR22_8955081.1  | 1606.09 | 32  |
| S102 |       | 616 | 22 | OAR22_5595255.1  | OAR22_7399531.1  | 1804.28 | 38  |
| S102 | CON   | 7   | 22 | OAR22_7348996.1  | OAR22_7399531.1  | 50.535  | 2   |
| S102 | UNION | 7   | 22 | s68573.1         | OAR22_8955081.1  | 8955.08 | 134 |
|      |       |     |    |                  |                  |         |     |
| S105 |       | 702 | 22 | OAR22_5872287.1  | OAR22_7511031.1  | 1638.74 | 34  |
| S105 |       | 152 | 22 | OAR22_5771792.1  | OAR22_7804834.1  | 2033.04 | 41  |
| S105 |       | 45  | 22 | OAR22_5711915.1  | OAR22_8033581.1  | 2321.67 | 47  |
| S105 |       | 829 | 22 | OAR22_4104153.1  | OAR22_6064565.1  | 1960.41 | 39  |
| S105 |       | 507 | 22 | s68573.1         | OAR22_8623862.1  | 8623.86 | 128 |
| S105 |       | 126 | 22 | OAR22_1250324.1  | OAR22_7588884.1  | 6338.56 | 102 |
| S105 |       | 616 | 22 | OAR22_5595255.1  | OAR22_7399531.1  | 1804.28 | 38  |
| S105 | CON   | 7   | 22 | OAR22_5872287.1  | OAR22_6064565.1  | 192.278 | 5   |
| S105 | UNION | 7   | 22 | s68573.1         | OAR22_8623862.1  | 8623.86 | 128 |
|      |       |     |    |                  |                  |         |     |
| S106 |       | 45  | 21 | DU196132_525.1   | s51905.1         | 2968.99 | 32  |
| S106 |       | 844 | 21 | s75988.1         | OAR21_54464294.1 | 7093.13 | 95  |
| S106 |       | 123 | 21 | s30026.1         | s11366.1         | 5205.16 | 71  |
| S106 |       | 507 | 21 | OAR21_43646542.1 | s49922.1         | 8141.23 | 108 |
| S106 |       | 702 | 21 | OAR21_38087037.1 | s49922.1         | 13700.7 | 160 |
| S106 |       | 627 | 21 | s03044.1         | OAR21_54143578.1 | 3949.9  | 61  |
| S106 |       | 90  | 21 | s23363.1         | s53160.1         | 4496.72 | 61  |
| S106 | CON   | 7   | 21 | s23363.1         | s49922.1         | 808.117 | 9   |
| S106 | UNION | 7   | 21 | OAR21_38087037.1 | s53160.1         | 17389.3 | 212 |
|      |       |     |    |                  |                  |         |     |
| S107 |       | 507 | 21 | OAR21_43646542.1 | s49922.1         | 8141.23 | 108 |
| S107 |       | 140 | 21 | s22832.1         | s67111.1         | 5518.15 | 45  |
| S107 |       | 27  | 21 | s25809.1         | s13923.1         | 11828.3 | 168 |
| S107 |       | 629 | 21 | DU383863_376.1   | s61876.1         | 2892.57 | 40  |
| S107 |       | 90  | 21 | s62516.1         | s75876.1         | 6474.15 | 60  |

|      |       |     |    |                  |                    |         |     |
|------|-------|-----|----|------------------|--------------------|---------|-----|
| S107 |       | 702 | 21 | OAR21_38087037.1 | s49922.1           | 13700.7 | 160 |
| S107 |       | 616 | 21 | DU383863_376.1   | OAR21_45728443_X.1 | 1979.97 | 30  |
| S107 | CON   | 7   | 21 | DU383863_376.1   | s13923.1           | 502.999 | 10  |
| S107 | UNION | 7   | 21 | s25809.1         | s49922.1           | 19364.6 | 265 |
| S108 |       | 829 | 21 | s75799.1         | s08492.1           | 2047.17 | 32  |
| S108 |       | 79  | 21 | OAR21_33044180.1 | s61235.1           | 3111.66 | 57  |
| S108 |       | 45  | 21 | OAR21_33336974.1 | OAR21_36484190_X.1 | 3147.22 | 53  |
| S108 |       | 606 | 21 | OAR21_21865772.1 | OAR21_36571389.1   | 14705.6 | 232 |
| S108 |       | 27  | 21 | s25809.1         | s13923.1           | 11828.3 | 168 |
| S108 |       | 90  | 21 | s75804.1         | s55303.1           | 6697.66 | 125 |
| S108 |       | 140 | 21 | s75799.1         | OAR21_38087037.1   | 2579.68 | 44  |
| S108 | CON   | 7   | 21 | s75799.1         | s61235.1           | 648.482 | 5   |
| S108 | UNION | 7   | 21 | OAR21_21865772.1 | s13923.1           | 22385.7 | 328 |
| S111 |       | 629 | 19 | OAR19_13260250.1 | OAR19_15065899.1   | 1805.65 | 32  |
| S111 |       | 627 | 19 | s40605.1         | OAR19_15065899.1   | 2211.24 | 41  |
| S111 |       | 61  | 19 | OAR19_10268706.1 | s25958.1           | 4848.61 | 90  |
| S111 |       | 152 | 19 | OAR19_9837128.1  | s12224.1           | 3663.3  | 70  |
| S111 |       | 79  | 19 | OAR19_11147748.1 | s12224.1           | 2352.68 | 44  |
| S111 |       | 45  | 19 | OAR19_3773707.1  | OAR19_13260250.1   | 9486.54 | 172 |
| S111 |       | 702 | 19 | OAR19_7253713.1  | s27711.1           | 16961.5 | 313 |
| S111 | CON   | 7   | 19 | OAR19_13260250.1 | OAR19_13260250.1   | 0       | 1   |
| S111 | UNION | 7   | 19 | OAR19_3773707.1  | s27711.1           | 20441.5 | 368 |
| S112 |       | 29  | 18 | s42732.1         | OAR18_49121315_X.1 | 4279.05 | 76  |
| S112 |       | 27  | 18 | s42732.1         | s05118.1           | 3781.96 | 66  |
| S112 |       | 45  | 18 | s42732.1         | OAR18_47151307.1   | 2309.04 | 40  |
| S112 |       | 629 | 18 | OAR18_44175536.1 | OAR18_48788444.1   | 4612.91 | 80  |
| S112 |       | 627 | 18 | OAR18_44175536.1 | s05118.1           | 4448.69 | 77  |
| S112 |       | 79  | 18 | OAR18_47094663.1 | OAR18_48997274.1   | 1902.61 | 34  |
| S112 |       | 90  | 18 | s65781.1         | OAR18_49121315_X.1 | 2310.04 | 44  |
| S112 | CON   | 7   | 18 | OAR18_47094663.1 | OAR18_47151307.1   | 56.644  | 2   |
| S112 | UNION | 7   | 18 | OAR18_44175536.1 | OAR18_49121315_X.1 | 4945.78 | 87  |
| S113 |       | 79  | 17 | OAR17_55061923.1 | OAR17_62559974.1   | 7498.05 | 120 |
| S113 |       | 829 | 17 | s44509.1         | s69675.1           | 5770.21 | 91  |
| S113 |       | 507 | 17 | s47176.1         | s49020.1           | 26754.9 | 433 |
| S113 |       | 702 | 17 | OAR17_36966397.1 | OAR17_74039265.1   | 37072.9 | 600 |
| S113 |       | 556 | 17 | s69675.1         | s13013.1           | 2066.88 | 35  |
| S113 |       | 627 | 17 | s46474.1         | OAR17_65490341.1   | 8079.56 | 133 |
| S113 |       | 61  | 17 | s36776.1         | OAR17_61822807.1   | 2992.36 | 51  |
| S113 | CON   | 7   | 17 | s69675.1         | s69675.1           | 0       | 1   |
| S113 | UNION | 7   | 17 | OAR17_36966397.1 | OAR17_74039265.1   | 37072.9 | 600 |
| S114 |       | 27  | 17 | OAR17_56962976.1 | DU493579_579.1     | 2311.53 | 34  |
| S114 |       | 79  | 17 | OAR17_55061923.1 | OAR17_62559974.1   | 7498.05 | 120 |
| S114 |       | 829 | 17 | s44509.1         | s69675.1           | 5770.21 | 91  |
| S114 |       | 507 | 17 | s47176.1         | s49020.1           | 26754.9 | 433 |
| S114 |       | 702 | 17 | OAR17_36966397.1 | OAR17_74039265.1   | 37072.9 | 600 |
| S114 |       | 627 | 17 | s46474.1         | OAR17_65490341.1   | 8079.56 | 133 |
| S114 |       | 61  | 17 | s36776.1         | OAR17_61822807.1   | 2992.36 | 51  |
| S114 | CON   | 7   | 17 | s36776.1         | DU493579_579.1     | 444.061 | 7   |
| S114 | UNION | 7   | 17 | OAR17_36966397.1 | OAR17_74039265.1   | 37072.9 | 600 |

|      |       |     |    |                  |                  |         |     |
|------|-------|-----|----|------------------|------------------|---------|-----|
| S115 |       | 27  | 17 | OAR17_56962976.1 | DU493579_579.1   | 2311.53 | 34  |
| S115 |       | 79  | 17 | OAR17_55061923.1 | OAR17_62559974.1 | 7498.05 | 120 |
| S115 |       | 829 | 17 | s44509.1         | s69675.1         | 5770.21 | 91  |
| S115 |       | 152 | 17 | s44509.1         | s33211.1         | 2693.86 | 44  |
| S115 |       | 507 | 17 | s47176.1         | s49020.1         | 26754.9 | 433 |
| S115 |       | 702 | 17 | OAR17_36966397.1 | OAR17_74039265.1 | 37072.9 | 600 |
| S115 |       | 627 | 17 | s46474.1         | OAR17_65490341.1 | 8079.56 | 133 |
| S115 | CON   | 7   | 17 | s46474.1         | s33211.1         | 306.569 | 8   |
| S115 | UNION | 7   | 17 | OAR17_36966397.1 | OAR17_74039265.1 | 37072.9 | 600 |
|      |       |     |    |                  |                  |         |     |
| S116 |       | 40  | 16 | s38913.1         | OAR16_18865349.1 | 5499.5  | 103 |
| S116 |       | 27  | 16 | s38913.1         | s01680.1         | 2273.09 | 44  |
| S116 |       | 844 | 16 | OAR16_13101603.1 | OAR16_16543821.1 | 3442.22 | 62  |
| S116 |       | 90  | 16 | OAR16_12311919.1 | s45825.1         | 1470.32 | 33  |
| S116 |       | 123 | 16 | OAR16_12276858.1 | OAR16_13935744.1 | 1658.89 | 36  |
| S116 |       | 702 | 16 | OAR16_11050320.1 | OAR16_20062365.1 | 9012.05 | 173 |
| S116 |       | 29  | 16 | OAR16_11445590.1 | OAR16_15329984.1 | 3884.39 | 78  |
| S116 | CON   | 7   | 16 | s38913.1         | s45825.1         | 416.394 | 10  |
| S116 | UNION | 7   | 16 | OAR16_11050320.1 | OAR16_20062365.1 | 9012.05 | 173 |
|      |       |     |    |                  |                  |         |     |
| S118 |       | 27  | 15 | OAR15_75169402.1 | OAR15_81649572.1 | 6480.17 | 139 |
| S118 |       | 45  | 15 | s32676.1         | OAR15_76419512.1 | 2091.67 | 36  |
| S118 |       | 29  | 15 | OAR15_73660126.1 | OAR15_75673025.1 | 2012.9  | 35  |
| S118 |       | 829 | 15 | OAR15_73610660.1 | OAR15_77297861.1 | 3687.2  | 75  |
| S118 |       | 507 | 15 | s65800.1         | s24876.1         | 2625.56 | 43  |
| S118 |       | 606 | 15 | s60467.1         | s57222.1         | 4219.52 | 71  |
| S118 |       | 702 | 15 | OAR15_71907029.1 | OAR15_76144996.1 | 4237.97 | 71  |
| S118 | CON   | 7   | 15 | OAR15_75169402.1 | OAR15_75673025.1 | 503.623 | 9   |
| S118 | UNION | 7   | 15 | OAR15_71907029.1 | OAR15_81649572.1 | 9742.54 | 193 |
|      |       |     |    |                  |                  |         |     |
| S129 |       | 40  | 15 | OAR15_43565431.1 | s34379.1         | 9826.51 | 115 |
| S129 |       | 801 | 15 | s71520.1         | OAR15_45313629.1 | 2299.97 | 46  |
| S129 |       | 507 | 15 | s71520.1         | OAR15_44828179.1 | 1814.52 | 35  |
| S129 |       | 702 | 15 | s45101.1         | OAR15_45753226.1 | 3043.09 | 59  |
| S129 |       | 140 | 15 | OAR15_41964058.1 | OAR15_45753226.1 | 3789.17 | 74  |
| S129 |       | 90  | 15 | OAR15_41465316.1 | OAR15_46781842.1 | 5316.53 | 97  |
| S129 |       | 627 | 15 | OAR15_41465316.1 | OAR15_53192586.1 | 11727.3 | 150 |
| S129 | CON   | 7   | 15 | OAR15_43565431.1 | OAR15_44828179.1 | 1262.75 | 24  |
| S129 | UNION | 7   | 15 | OAR15_41465316.1 | s34379.1         | 11926.6 | 153 |
|      |       |     |    |                  |                  |         |     |
| S130 |       | 49  | 14 | s42994.1         | s41160.1         | 2649.81 | 37  |
| S130 |       | 629 | 14 | OAR14_53138348.1 | OAR14_55447588.1 | 2309.24 | 39  |
| S130 |       | 123 | 14 | s16936.1         | OAR14_55447588.1 | 2612.12 | 44  |
| S130 |       | 126 | 14 | s39024.1         | s04653.1         | 4645.22 | 62  |
| S130 |       | 90  | 14 | OAR14_55447588.1 | OAR14_58537282.1 | 3089.69 | 43  |
| S130 |       | 140 | 14 | OAR14_54070310.1 | OAR14_56421333.1 | 2351.02 | 30  |
| S130 |       | 152 | 14 | OAR14_52929077.1 | OAR14_56868551.1 | 3939.47 | 57  |
| S130 | CON   | 7   | 14 | OAR14_55447588.1 | OAR14_55447588.1 | 0       | 1   |
| S130 | UNION | 7   | 14 | s39024.1         | OAR14_58537282.1 | 6386.1  | 91  |
|      |       |     |    |                  |                  |         |     |
| S131 |       | 49  | 14 | s42994.1         | s41160.1         | 2649.81 | 37  |
| S131 |       | 629 | 14 | OAR14_53138348.1 | OAR14_55447588.1 | 2309.24 | 39  |
| S131 |       | 507 | 14 | OAR14_52929077.1 | s10360.1         | 1894.68 | 32  |
| S131 |       | 123 | 14 | s16936.1         | OAR14_55447588.1 | 2612.12 | 44  |
| S131 |       | 126 | 14 | s39024.1         | s04653.1         | 4645.22 | 62  |

|      |       |     |    |                    |                    |         |      |
|------|-------|-----|----|--------------------|--------------------|---------|------|
| S131 |       | 152 | 14 | OAR14_52929077.1   | OAR14_56868551.1   | 3939.47 | 57   |
| S131 |       | 140 | 14 | OAR14_54070310.1   | OAR14_56421333.1   | 2351.02 | 30   |
| S131 | CON   | 7   | 14 | OAR14_54070310.1   | s10360.1           | 753.445 | 11   |
| S131 | UNION | 7   | 14 | s39024.1           | OAR14_56868551.1   | 4717.37 | 64   |
| S132 |       | 29  | 13 | s62936.1           | OAR13_35198687.1   | 9473.28 | 175  |
| S132 |       | 606 | 13 | OAR13_22595627.1   | OAR13_26635884.1   | 4040.26 | 80   |
| S132 |       | 629 | 13 | OAR13_22595627.1   | OAR13_26635884.1   | 4040.26 | 80   |
| S132 |       | 49  | 13 | OAR13_21176498.1   | OAR13_26177858.1   | 5001.36 | 93   |
| S132 |       | 829 | 13 | s29601.1           | OAR13_37876562.1   | 14843.5 | 275  |
| S132 |       | 616 | 13 | OAR13_19366874.1   | s47163.1           | 7083.23 | 139  |
| S132 |       | 123 | 13 | s43905.1           | OAR13_26635884.1   | 6436.53 | 127  |
| S132 | CON   | 7   | 13 | s62936.1           | OAR13_26177858.1   | 452.455 | 10   |
| S132 | UNION | 7   | 13 | OAR13_19366874.1   | OAR13_37876562.1   | 18509.7 | 349  |
| S133 |       | 40  | 12 | OAR12_65650955.1   | s59916.1           | 1646.15 | 33   |
| S133 |       | 606 | 12 | OAR12_64858268.1   | s09441.1           | 2113.07 | 42   |
| S133 |       | 627 | 12 | OAR12_64690849.1   | s22773.1           | 2642.42 | 52   |
| S133 |       | 629 | 12 | OAR12_64690849.1   | s22773.1           | 2642.42 | 52   |
| S133 |       | 702 | 12 | s22960.1           | s60710.1           | 58755.9 | 1088 |
| S133 |       | 152 | 12 | s30614.1           | s20113.1           | 2334.94 | 49   |
| S133 |       | 27  | 12 | OAR12_64944672.1   | OAR12_67663336.1   | 2718.66 | 55   |
| S133 | CON   | 7   | 12 | OAR12_65650955.1   | s20113.1           | 1148.72 | 26   |
| S133 | UNION | 7   | 12 | s22960.1           | s60710.1           | 58755.9 | 1088 |
| S134 |       | 79  | 11 | s21891.1           | OAR11_26956590.1   | 2019.1  | 35   |
| S134 |       | 61  | 11 | OAR11_24444900_X.1 | s51636.1           | 3113.63 | 49   |
| S134 |       | 126 | 11 | s27941.1           | s31598.1           | 2423.43 | 41   |
| S134 |       | 90  | 11 | s08572.1           | OAR11_30551868.1   | 7951.23 | 122  |
| S134 |       | 702 | 11 | OAR11_17172323.1   | OAR11_33359712.1   | 16187.4 | 260  |
| S134 |       | 123 | 11 | s17310.1           | OAR11_29271153.1   | 9483.93 | 143  |
| S134 |       | 27  | 11 | s04627.1           | s73325.1           | 5587.46 | 73   |
| S134 | CON   | 7   | 11 | s21891.1           | s31598.1           | 180.155 | 5    |
| S134 | UNION | 7   | 11 | OAR11_17172323.1   | OAR11_33359712.1   | 16187.4 | 260  |
| S135 |       | 45  | 10 | OAR10_35722333.1   | OAR10_57396545.1   | 21674.2 | 405  |
| S135 |       | 123 | 10 | OAR10_35722333.1   | OAR10_41054879.1   | 5332.55 | 89   |
| S135 |       | 702 | 10 | s49567.1           | OAR10_48462141.1   | 48462.1 | 914  |
| S135 |       | 829 | 10 | OAR10_33047233.1   | OAR10_51969493.1   | 18922.3 | 352  |
| S135 |       | 801 | 10 | s38022.1           | OAR10_41435807.1   | 5825.97 | 101  |
| S135 |       | 606 | 10 | OAR10_35692572.1   | OAR10_37319785_X.1 | 1627.21 | 30   |
| S135 |       | 844 | 10 | s18518.1           | s35062.1           | 1609.48 | 32   |
| S135 | CON   | 7   | 10 | s18518.1           | OAR10_37319785_X.1 | 1242.86 | 23   |
| S135 | UNION | 7   | 10 | s49567.1           | OAR10_57396545.1   | 57396.5 | 1095 |
| S137 |       | 40  | 10 | OAR10_28598904.1   | s18834.1           | 1227.84 | 31   |
| S137 |       | 507 | 10 | OAR10_28598904.1   | s18834.1           | 1227.84 | 31   |
| S137 |       | 627 | 10 | OAR10_25752393.1   | OAR10_29546872.1   | 3794.48 | 85   |
| S137 |       | 629 | 10 | OAR10_25752393.1   | OAR10_29546872.1   | 3794.48 | 85   |
| S137 |       | 152 | 10 | OAR10_25624621.1   | OAR10_29538398.1   | 3913.78 | 87   |
| S137 |       | 702 | 10 | s49567.1           | OAR10_48462141.1   | 48462.1 | 914  |
| S137 |       | 844 | 10 | OAR10_17703888.1   | s09622.1           | 13279.3 | 268  |
| S137 | CON   | 7   | 10 | OAR10_28598904.1   | OAR10_29538398.1   | 939.494 | 25   |
| S137 | UNION | 7   | 10 | s49567.1           | OAR10_48462141.1   | 48462.1 | 914  |

|      |       |     |   |                  |                  |         |      |
|------|-------|-----|---|------------------|------------------|---------|------|
| S138 |       | 61  | 9 | OAR9_81293209.1  | s03389.1         | 2086.52 | 36   |
| S138 |       | 152 | 9 | s68078.1         | OAR9_82953999.1  | 2041.55 | 36   |
| S138 |       | 627 | 9 | s68078.1         | OAR9_82953999.1  | 2041.55 | 36   |
| S138 |       | 629 | 9 | s68078.1         | OAR9_82953999.1  | 2041.55 | 36   |
| S138 |       | 702 | 9 | OAR9_38323108.1  | OAR9_96544082.1  | 58221   | 1087 |
| S138 |       | 140 | 9 | s10879.1         | s05406.1         | 2485.9  | 47   |
| S138 |       | 123 | 9 | OAR9_80918118.1  | OAR9_82953999.1  | 2035.88 | 35   |
| S138 | CON   | 7   | 9 | OAR9_81293209.1  | s05406.1         | 1390.51 | 22   |
| S138 | UNION | 7   | 9 | OAR9_38323108.1  | OAR9_96544082.1  | 58221   | 1087 |
|      |       |     |   |                  |                  |         |      |
| S139 |       | 140 | 8 | s61158.1         | OAR8_52791160.1  | 9209.77 | 166  |
| S139 |       | 126 | 8 | OAR8_42338337.1  | OAR8_45925190.1  | 3586.85 | 72   |
| S139 |       | 627 | 8 | s28792.1         | s61158.1         | 2639.09 | 53   |
| S139 |       | 629 | 8 | s28792.1         | s61158.1         | 2639.09 | 53   |
| S139 |       | 829 | 8 | s66809.1         | OAR8_49120824.1  | 9189.29 | 175  |
| S139 |       | 123 | 8 | OAR8_34202419.1  | OAR8_45617687.1  | 11415.3 | 218  |
| S139 |       | 45  | 8 | OAR8_41415390.1  | OAR8_43915897.1  | 2500.51 | 46   |
| S139 | CON   | 7   | 8 | s61158.1         | s61158.1         | 0       | 1    |
| S139 | UNION | 7   | 8 | OAR8_34202419.1  | OAR8_52791160.1  | 18588.7 | 347  |
|      |       |     |   |                  |                  |         |      |
| S140 |       | 801 | 7 | OAR7_71047974.1  | OAR7_73062925.1  | 2014.95 | 34   |
| S140 |       | 606 | 7 | OAR7_68768125.1  | s56478.1         | 3002.79 | 51   |
| S140 |       | 616 | 7 | s45070.1         | s56478.1         | 3604.95 | 59   |
| S140 |       | 45  | 7 | s45070.1         | s56478.1         | 3604.95 | 59   |
| S140 |       | 702 | 7 | OAR7_31685912.1  | OAR7_72973471.1  | 41287.6 | 769  |
| S140 |       | 507 | 7 | OAR7_52043940.1  | OAR7_71832636.1  | 19788.7 | 355  |
| S140 |       | 29  | 7 | OAR7_56240366.1  | OAR7_77667178.1  | 21426.8 | 390  |
| S140 | CON   | 7   | 7 | OAR7_71047974.1  | s56478.1         | 722.943 | 15   |
| S140 | UNION | 7   | 7 | OAR7_31685912.1  | OAR7_77667178.1  | 45981.3 | 865  |
|      |       |     |   |                  |                  |         |      |
| S141 |       | 606 | 7 | OAR7_68768125.1  | s56478.1         | 3002.79 | 51   |
| S141 |       | 616 | 7 | s45070.1         | s56478.1         | 3604.95 | 59   |
| S141 |       | 45  | 7 | s45070.1         | s56478.1         | 3604.95 | 59   |
| S141 |       | 702 | 7 | OAR7_31685912.1  | OAR7_72973471.1  | 41287.6 | 769  |
| S141 |       | 507 | 7 | OAR7_52043940.1  | OAR7_71832636.1  | 19788.7 | 355  |
| S141 |       | 29  | 7 | OAR7_56240366.1  | OAR7_77667178.1  | 21426.8 | 390  |
| S141 |       | 123 | 7 | s03425.1         | OAR7_70071978.1  | 2562.47 | 40   |
| S141 | CON   | 7   | 7 | OAR7_68768125.1  | OAR7_70071978.1  | 1303.85 | 16   |
| S141 | UNION | 7   | 7 | OAR7_31685912.1  | OAR7_77667178.1  | 45981.3 | 865  |
|      |       |     |   |                  |                  |         |      |
| S142 |       | 29  | 6 | OAR6_121651498.1 | OAR6_124727445.1 | 3075.95 | 59   |
| S142 |       | 844 | 6 | OAR6_121433524.1 | OAR6_123886396.1 | 2452.87 | 43   |
| S142 |       | 801 | 6 | OAR6_120674641.1 | s42254.1         | 3373.02 | 61   |
| S142 |       | 45  | 6 | OAR6_119942135.1 | OAR6_122276062.1 | 2333.93 | 39   |
| S142 |       | 507 | 6 | OAR6_119942135.1 | OAR6_122276062.1 | 2333.93 | 39   |
| S142 |       | 61  | 6 | OAR6_119546066.1 | s55094.1         | 2796.93 | 50   |
| S142 |       | 140 | 6 | s08027.1         | s18701.1         | 4432.34 | 84   |
| S142 | CON   | 7   | 6 | OAR6_121651498.1 | OAR6_122276062.1 | 624.564 | 5    |
| S142 | UNION | 7   | 6 | OAR6_119546066.1 | OAR6_124727445.1 | 5181.38 | 102  |
|      |       |     |   |                  |                  |         |      |
| S143 |       | 61  | 6 | s40686.1         | s10844.1         | 3055.35 | 42   |
| S143 |       | 844 | 6 | s59122.1         | OAR6_119125205.1 | 3781.3  | 51   |
| S143 |       | 29  | 6 | s03175.1         | s10844.1         | 3259.64 | 45   |
| S143 |       | 606 | 6 | s25188.1         | s10844.1         | 3280.93 | 46   |
| S143 |       | 140 | 6 | s40686.1         | s19234.1         | 3575.59 | 48   |

|      |       |     |   |                  |                    |         |      |
|------|-------|-----|---|------------------|--------------------|---------|------|
| S143 |       | 616 | 6 | s40686.1         | s65263.1           | 3530.51 | 47   |
| S143 |       | 702 | 6 | s03175.1         | s49558.1           | 3896.24 | 53   |
| S143 | CON   | 7   | 6 | s40686.1         | s10844.1           | 3055.35 | 42   |
| S143 | UNION | 7   | 6 | s25188.1         | s49558.1           | 3917.52 | 54   |
| S144 |       | 123 | 5 | OAR5_67426945.1  | OAR5_70029869.1    | 2602.92 | 48   |
| S144 |       | 126 | 5 | s52618.1         | OAR5_72565538.1    | 7244.72 | 139  |
| S144 |       | 29  | 5 | s07518.1         | OAR5_68302417.1    | 3681.04 | 76   |
| S144 |       | 90  | 5 | DU444709_372.1   | OAR5_68350537.1    | 7925.86 | 122  |
| S144 |       | 801 | 5 | s11947.1         | OAR5_69909638.1    | 1818.53 | 34   |
| S144 |       | 27  | 5 | OAR5_63370705.1  | s36664.1           | 5079.16 | 100  |
| S144 |       | 629 | 5 | OAR5_57983508.1  | OAR5_71824766.1    | 13841.3 | 230  |
| S144 | CON   | 7   | 5 | s11947.1         | OAR5_68302417.1    | 211.304 | 4    |
| S144 | UNION | 7   | 5 | OAR5_57983508.1  | OAR5_72565538.1    | 14582   | 241  |
| S145 |       | 627 | 3 | OAR3_206227595.1 | OAR3_209042148.1   | 2814.55 | 62   |
| S145 |       | 629 | 3 | OAR3_206227595.1 | OAR3_209042148.1   | 2814.55 | 62   |
| S145 |       | 829 | 3 | OAR3_205737877.1 | OAR3_208666709.1   | 2928.83 | 65   |
| S145 |       | 507 | 3 | OAR3_179244393.1 | OAR3_211362922_X.1 | 32118.5 | 604  |
| S145 |       | 606 | 3 | OAR3_208666709.1 | s05793.1           | 2048.02 | 40   |
| S145 |       | 123 | 3 | OAR3_207289038.1 | OAR3_208794039.1   | 1505    | 31   |
| S145 |       | 157 | 3 | OAR3_206856083.1 | OAR3_209162669.1   | 2306.59 | 49   |
| S145 | CON   | 7   | 3 | OAR3_208666709.1 | OAR3_208666709.1   | 0       | 1    |
| S145 | UNION | 7   | 3 | OAR3_179244393.1 | OAR3_211362922_X.1 | 32118.5 | 604  |
| S146 |       | 45  | 3 | OAR3_25294644.1  | OAR3_27011374.1    | 1716.73 | 37   |
| S146 |       | 123 | 3 | OAR3_24592746.1  | s13240.1           | 2053.62 | 40   |
| S146 |       | 27  | 3 | OAR3_24402850.1  | s28199.1           | 1947.6  | 38   |
| S146 |       | 29  | 3 | OAR3_24402850.1  | s19023.1           | 1577.89 | 31   |
| S146 |       | 152 | 3 | OAR3_24047322.1  | OAR3_27322763.1    | 3275.44 | 68   |
| S146 |       | 507 | 3 | s49768.1         | OAR3_28567790.1    | 9061.66 | 193  |
| S146 |       | 702 | 3 | DU259120_464.1   | OAR3_59494261.1    | 59494.3 | 1111 |
| S146 | CON   | 7   | 3 | OAR3_25294644.1  | s19023.1           | 686.1   | 14   |
| S146 | UNION | 7   | 3 | DU259120_464.1   | OAR3_59494261.1    | 59494.3 | 1111 |
| S149 |       | 123 | 3 | OAR3_24592746.1  | s13240.1           | 2053.62 | 40   |
| S149 |       | 27  | 3 | OAR3_24402850.1  | s28199.1           | 1947.6  | 38   |
| S149 |       | 29  | 3 | OAR3_24402850.1  | s19023.1           | 1577.89 | 31   |
| S149 |       | 152 | 3 | OAR3_24047322.1  | OAR3_27322763.1    | 3275.44 | 68   |
| S149 |       | 90  | 3 | OAR3_22936544.1  | s54478.1           | 1985.68 | 39   |
| S149 |       | 702 | 3 | DU259120_464.1   | OAR3_59494261.1    | 59494.3 | 1111 |
| S149 |       | 507 | 3 | s49768.1         | OAR3_28567790.1    | 9061.66 | 193  |
| S149 | CON   | 7   | 3 | OAR3_24592746.1  | s54478.1           | 329.479 | 5    |
| S149 | UNION | 7   | 3 | DU259120_464.1   | OAR3_59494261.1    | 59494.3 | 1111 |
| S151 |       | 27  | 3 | OAR3_24402850.1  | s28199.1           | 1947.6  | 38   |
| S151 |       | 29  | 3 | OAR3_24402850.1  | s19023.1           | 1577.89 | 31   |
| S151 |       | 152 | 3 | OAR3_24047322.1  | OAR3_27322763.1    | 3275.44 | 68   |
| S151 |       | 90  | 3 | OAR3_22936544.1  | s54478.1           | 1985.68 | 39   |
| S151 |       | 79  | 3 | OAR3_17718190.1  | OAR3_24559969.1    | 6841.78 | 153  |
| S151 |       | 702 | 3 | DU259120_464.1   | OAR3_59494261.1    | 59494.3 | 1111 |
| S151 |       | 507 | 3 | s49768.1         | OAR3_28567790.1    | 9061.66 | 193  |
| S151 | CON   | 7   | 3 | OAR3_24402850.1  | OAR3_24559969.1    | 157.119 | 5    |
| S151 | UNION | 7   | 3 | DU259120_464.1   | OAR3_59494261.1    | 59494.3 | 1111 |



|      |       |     |   |                    |                    |         |     |
|------|-------|-----|---|--------------------|--------------------|---------|-----|
| S152 |       | 29  | 2 | s20556.1           | s56215.1           | 1280.3  | 30  |
| S152 |       | 616 | 2 | OAR2_172094342.1   | OAR2_175943638.1   | 3849.3  | 82  |
| S152 |       | 829 | 2 | OAR2_171930761.1   | OAR2_175660582.1   | 3729.82 | 83  |
| S152 |       | 844 | 2 | OAR2_171247972.1   | OAR2_172663891.1   | 1415.92 | 32  |
| S152 |       | 123 | 2 | OAR2_167959232.1   | OAR2_176091475.1   | 8132.24 | 171 |
| S152 |       | 507 | 2 | OAR2_167852063.1   | OAR2_173821801.1   | 5969.74 | 125 |
| S152 |       | 90  | 2 | OAR2_170073165.1   | OAR2_173940252.1   | 3867.09 | 87  |
| S152 | CON   | 7   | 2 | s20556.1           | OAR2_172663891.1   | 68.911  | 3   |
| S152 | UNION | 7   | 2 | OAR2_167852063.1   | OAR2_176091475.1   | 8239.41 | 174 |
|      |       |     |   |                    |                    |         |     |
| S154 |       | 829 | 2 | OAR2_171930761.1   | OAR2_175660582.1   | 3729.82 | 83  |
| S154 |       | 844 | 2 | OAR2_171247972.1   | OAR2_172663891.1   | 1415.92 | 32  |
| S154 |       | 123 | 2 | OAR2_167959232.1   | OAR2_176091475.1   | 8132.24 | 171 |
| S154 |       | 616 | 2 | OAR2_172094342.1   | OAR2_175943638.1   | 3849.3  | 82  |
| S154 |       | 90  | 2 | OAR2_170073165.1   | OAR2_173940252.1   | 3867.09 | 87  |
| S154 |       | 140 | 2 | OAR2_169232830.1   | OAR2_172379160.1   | 3146.33 | 68  |
| S154 |       | 507 | 2 | OAR2_167852063.1   | OAR2_173821801.1   | 5969.74 | 125 |
| S154 | CON   | 7   | 2 | OAR2_172094342.1   | OAR2_172379160.1   | 284.818 | 5   |
| S154 | UNION | 7   | 2 | OAR2_167852063.1   | OAR2_176091475.1   | 8239.41 | 174 |
|      |       |     |   |                    |                    |         |     |
| S155 |       | 123 | 2 | OAR2_140051989_X.1 | OAR2_144244441.1   | 4192.45 | 95  |
| S155 |       | 29  | 2 | s49391.1           | OAR2_141900838.1   | 2573.2  | 56  |
| S155 |       | 45  | 2 | OAR2_141764296.1   | OAR2_143949087.1   | 2184.79 | 45  |
| S155 |       | 829 | 2 | OAR2_141723000.1   | DU292901_688.1     | 2328.84 | 49  |
| S155 |       | 140 | 2 | OAR2_140086515.1   | s51093.1           | 1777.37 | 43  |
| S155 |       | 40  | 2 | OAR2_139988851.1   | OAR2_143429707_X.1 | 3440.86 | 78  |
| S155 |       | 702 | 2 | s54108.1           | OAR2_162167662.1   | 23623.2 | 482 |
| S155 | CON   | 7   | 2 | OAR2_141764296.1   | s51093.1           | 99.592  | 2   |
| S155 | UNION | 7   | 2 | s54108.1           | OAR2_162167662.1   | 23623.2 | 482 |
|      |       |     |   |                    |                    |         |     |
| S157 |       | 27  | 2 | OAR2_90226425.1    | s52970.1           | 1662.46 | 34  |
| S157 |       | 45  | 2 | OAR2_90110357.1    | s52970.1           | 1778.53 | 36  |
| S157 |       | 606 | 2 | s14873.1           | OAR2_96066817.1    | 6724.02 | 118 |
| S157 |       | 49  | 2 | OAR2_90239503.1    | OAR2_96436987_X.1  | 6197.48 | 106 |
| S157 |       | 90  | 2 | OAR2_90239503.1    | s66693.1           | 3509.49 | 72  |
| S157 |       | 79  | 2 | OAR2_90239503.1    | OAR2_91821070.1    | 1581.57 | 31  |
| S157 |       | 801 | 2 | OAR2_91185502.1    | s48473.1           | 1817.05 | 39  |
| S157 | CON   | 7   | 2 | OAR2_91185502.1    | OAR2_91821070.1    | 635.568 | 16  |
| S157 | UNION | 7   | 2 | s14873.1           | OAR2_96436987_X.1  | 7094.19 | 123 |
|      |       |     |   |                    |                    |         |     |
| S158 |       | 627 | 1 | s09614.1           | s18847.1           | 2947.5  | 42  |
| S158 |       | 629 | 1 | s09614.1           | s18847.1           | 2947.5  | 42  |
| S158 |       | 606 | 1 | s35781.1           | OAR1_287434870.1   | 2608.39 | 48  |
| S158 |       | 61  | 1 | s35781.1           | OAR1_287434870.1   | 2608.39 | 48  |
| S158 |       | 29  | 1 | OAR1_283569518.1   | s39199.1           | 5956.3  | 95  |
| S158 |       | 507 | 1 | s22571.1           | s56772.1           | 15398.3 | 291 |
| S158 |       | 702 | 1 | OAR1_282017475.1   | s67262.1           | 9551.48 | 171 |
| S158 | CON   | 7   | 1 | s09614.1           | OAR1_287434870.1   | 1752.35 | 32  |
| S158 | UNION | 7   | 1 | s22571.1           | s56772.1           | 15398.3 | 291 |
|      |       |     |   |                    |                    |         |     |
| S160 |       | 90  | 1 | OAR1_124078281.1   | OAR1_138926518.1   | 14848.2 | 257 |
| S160 |       | 606 | 1 | OAR1_120032190.1   | s74762.1           | 6498.59 | 124 |
| S160 |       | 702 | 1 | s14189.1           | s40751.1           | 42088.8 | 712 |
| S160 |       | 45  | 1 | s37607.1           | s04671.1           | 16346.9 | 247 |
| S160 |       | 123 | 1 | s53597.1           | OAR1_153662211.1   | 35798.6 | 631 |

|      |       |     |   |                  |                    |         |     |
|------|-------|-----|---|------------------|--------------------|---------|-----|
| S160 |       | 27  | 1 | OAR1_119613390.1 | s02795.1           | 5219.57 | 100 |
| S160 |       | 79  | 1 | s75317.1         | s66718.1           | 6978.38 | 93  |
| S160 | CON   | 7   | 1 | s75317.1         | s02795.1           | 207.814 | 5   |
| S160 | UNION | 7   | 1 | s14189.1         | OAR1_153662211.1   | 45938.1 | 791 |
| S161 |       | 90  | 1 | OAR1_121425150.1 | OAR1_123217898.1   | 1792.75 | 30  |
| S161 |       | 606 | 1 | OAR1_120032190.1 | s74762.1           | 6498.59 | 124 |
| S161 |       | 61  | 1 | OAR1_117978374.1 | OAR1_122656397.1   | 4678.02 | 78  |
| S161 |       | 45  | 1 | s37607.1         | s04671.1           | 16346.9 | 247 |
| S161 |       | 702 | 1 | s14189.1         | s40751.1           | 42088.8 | 712 |
| S161 |       | 123 | 1 | s53597.1         | OAR1_153662211.1   | 35798.6 | 631 |
| S161 |       | 27  | 1 | OAR1_119613390.1 | s02795.1           | 5219.57 | 100 |
| S161 | CON   | 7   | 1 | OAR1_121425150.1 | OAR1_122656397.1   | 1231.25 | 19  |
| S161 | UNION | 7   | 1 | s14189.1         | OAR1_153662211.1   | 45938.1 | 791 |
| S165 |       | 829 | 1 | OAR1_117951301.1 | OAR1_120197222.1   | 2245.92 | 34  |
| S165 |       | 702 | 1 | s14189.1         | s40751.1           | 42088.8 | 712 |
| S165 |       | 606 | 1 | OAR1_120032190.1 | s74762.1           | 6498.59 | 124 |
| S165 |       | 61  | 1 | OAR1_117978374.1 | OAR1_122656397.1   | 4678.02 | 78  |
| S165 |       | 45  | 1 | s37607.1         | s04671.1           | 16346.9 | 247 |
| S165 |       | 123 | 1 | s53597.1         | OAR1_153662211.1   | 35798.6 | 631 |
| S165 |       | 27  | 1 | OAR1_119613390.1 | s02795.1           | 5219.57 | 100 |
| S165 | CON   | 7   | 1 | OAR1_120032190.1 | OAR1_120197222.1   | 165.032 | 5   |
| S165 | UNION | 7   | 1 | s14189.1         | OAR1_153662211.1   | 45938.1 | 791 |
| S176 |       | 49  | 1 | OAR1_113402761.1 | s75030.1           | 4288.36 | 49  |
| S176 |       | 556 | 1 | OAR1_112929344.1 | OAR1_117762259.1   | 4832.91 | 61  |
| S176 |       | 40  | 1 | s69088.1         | OAR1_114069491_X.1 | 2477.52 | 40  |
| S176 |       | 801 | 1 | OAR1_110989185.1 | s10939.1           | 7522.21 | 114 |
| S176 |       | 507 | 1 | OAR1_109879519.1 | OAR1_114069491_X.1 | 4189.97 | 75  |
| S176 |       | 79  | 1 | OAR1_108764473.1 | s01025.1           | 4913.19 | 93  |
| S176 |       | 702 | 1 | s14189.1         | s40751.1           | 42088.8 | 712 |
| S176 | CON   | 7   | 1 | OAR1_113402761.1 | s01025.1           | 274.904 | 3   |
| S176 | UNION | 7   | 1 | s14189.1         | s40751.1           | 42088.8 | 712 |
| S180 |       | 801 | 1 | OAR1_110989185.1 | s10939.1           | 7522.21 | 114 |
| S180 |       | 507 | 1 | OAR1_109879519.1 | OAR1_114069491_X.1 | 4189.97 | 75  |
| S180 |       | 45  | 1 | OAR1_109726063.1 | s17035.1           | 1601.31 | 34  |
| S180 |       | 90  | 1 | OAR1_108774968.1 | s74483.1           | 2594.22 | 49  |
| S180 |       | 79  | 1 | OAR1_108764473.1 | s01025.1           | 4913.19 | 93  |
| S180 |       | 27  | 1 | s00446.1         | s04333.1           | 4130.65 | 80  |
| S180 |       | 702 | 1 | s14189.1         | s40751.1           | 42088.8 | 712 |
| S180 | CON   | 7   | 1 | OAR1_110989185.1 | s17035.1           | 338.19  | 8   |
| S180 | UNION | 7   | 1 | s14189.1         | s40751.1           | 42088.8 | 712 |
| S181 |       | 40  | 1 | s40404.1         | s30526.1           | 3182.16 | 55  |
| S181 |       | 152 | 1 | s40404.1         | s01842.1           | 3048.15 | 51  |
| S181 |       | 123 | 1 | s67590.1         | s45674.1           | 11170   | 204 |
| S181 |       | 45  | 1 | s45674.1         | OAR1_37896369_X.1  | 3544.34 | 59  |
| S181 |       | 829 | 1 | s70438.1         | s26451.1           | 1459.78 | 31  |
| S181 |       | 702 | 1 | OAR1_7717464.1   | OAR1_58938560.1    | 51221.1 | 934 |
| S181 |       | 61  | 1 | OAR1_32040848.1  | OAR1_37282541.1    | 5241.69 | 99  |
| S181 | CON   | 7   | 1 | s45674.1         | s45674.1           | 0       | 1   |
| S181 | UNION | 7   | 1 | OAR1_7717464.1   | OAR1_58938560.1    | 51221.1 | 934 |

|      |       |     |    |                  |                    |         |     |
|------|-------|-----|----|------------------|--------------------|---------|-----|
| S182 |       | 126 | 1  | OAR1_24633611.1  | OAR1_27431644.1    | 2798.03 | 43  |
| S182 |       | 829 | 1  | s54037.1         | s69885.1           | 10257.1 | 174 |
| S182 |       | 606 | 1  | OAR1_15578534.1  | s69885.1           | 12559.2 | 218 |
| S182 |       | 702 | 1  | OAR1_7717464.1   | OAR1_58938560.1    | 51221.1 | 934 |
| S182 |       | 123 | 1  | s67590.1         | s45674.1           | 11170   | 204 |
| S182 |       | 801 | 1  | OAR1_25052307.1  | s69885.1           | 3085.43 | 47  |
| S182 |       | 40  | 1  | OAR1_27215234.1  | s14002.1           | 2024.45 | 36  |
| S182 | CON   | 7   | 1  | OAR1_27215234.1  | OAR1_27431644.1    | 216.41  | 5   |
| S182 | UNION | 7   | 1  | OAR1_7717464.1   | OAR1_58938560.1    | 51221.1 | 934 |
|      |       |     |    |                  |                    |         |     |
| S185 |       | 829 | 1  | s54037.1         | s69885.1           | 10257.1 | 174 |
| S185 |       | 49  | 1  | s38279.1         | OAR1_19214328_X.1  | 1987.17 | 36  |
| S185 |       | 606 | 1  | OAR1_15578534.1  | s69885.1           | 12559.2 | 218 |
| S185 |       | 627 | 1  | OAR1_15256499.1  | OAR1_18052854.1    | 2796.36 | 53  |
| S185 |       | 702 | 1  | OAR1_7717464.1   | OAR1_58938560.1    | 51221.1 | 934 |
| S185 |       | 90  | 1  | OAR1_16750809.1  | OAR1_19152280.1    | 2401.47 | 43  |
| S185 |       | 507 | 1  | OAR1_16852861.1  | s20207.1           | 1863.11 | 30  |
| S185 | CON   | 7   | 1  | s54037.1         | OAR1_18052854.1    | 172.176 | 3   |
| S185 | UNION | 7   | 1  | OAR1_7717464.1   | OAR1_58938560.1    | 51221.1 | 934 |
|      |       |     |    |                  |                    |         |     |
| S186 |       | 90  | 26 | s17399.1         | s68466.1           | 2193.9  | 38  |
| S186 |       | 61  | 26 | OAR26_36101444.1 | OAR26_38739733.1   | 2638.29 | 38  |
| S186 |       | 27  | 26 | s70442.1         | OAR26_38635621.1   | 2879.24 | 43  |
| S186 |       | 629 | 26 | OAR26_35704585.1 | OAR26_38568519.1   | 2863.93 | 43  |
| S186 |       | 45  | 26 | s70488.1         | OAR26_42514266.1   | 6953.15 | 122 |
| S186 |       | 49  | 26 | s55357.1         | OAR26_38251830.1   | 2778.42 | 39  |
| S186 | CON   | 6   | 26 | s17399.1         | OAR26_38251830.1   | 321.706 | 4   |
| S186 | UNION | 6   | 26 | s55357.1         | OAR26_42514266.1   | 7040.86 | 123 |
|      |       |     |    |                  |                    |         |     |
| S187 |       | 844 | 26 | OAR26_28236209.1 | OAR26_30036643.1   | 1800.43 | 37  |
| S187 |       | 29  | 26 | OAR26_26341151.1 | OAR26_31513764.1   | 5172.61 | 112 |
| S187 |       | 27  | 26 | OAR26_19029894.1 | s08067.1           | 9710.75 | 157 |
| S187 |       | 507 | 26 | s09495.1         | s30198.1           | 2950.89 | 60  |
| S187 |       | 702 | 26 | OAR26_28236209.1 | OAR26_30762736.1   | 2526.53 | 55  |
| S187 |       | 140 | 26 | OAR26_28570026.1 | OAR26_30797071.1   | 2227.05 | 49  |
| S187 | CON   | 6   | 26 | OAR26_28570026.1 | s08067.1           | 170.622 | 6   |
| S187 | UNION | 6   | 26 | OAR26_19029894.1 | OAR26_31513764.1   | 12483.9 | 219 |
|      |       |     |    |                  |                    |         |     |
| S193 |       | 126 | 25 | s51480.1         | OAR25_48288071_X.1 | 3036.69 | 51  |
| S193 |       | 801 | 25 | OAR25_44198124.1 | s41617.1           | 1631.45 | 33  |
| S193 |       | 27  | 25 | OAR25_44198124.1 | s37589.1           | 1568.76 | 31  |
| S193 |       | 45  | 25 | OAR25_43801573.1 | s37589.1           | 1965.31 | 37  |
| S193 |       | 29  | 25 | OAR25_43581009.1 | s51234.1           | 3907.33 | 73  |
| S193 |       | 123 | 25 | OAR25_43417329.1 | OAR25_48288071_X.1 | 4870.74 | 91  |
| S193 | CON   | 6   | 25 | s51480.1         | s37589.1           | 515.497 | 6   |
| S193 | UNION | 6   | 25 | OAR25_43417329.1 | OAR25_48288071_X.1 | 4870.74 | 91  |
|      |       |     |    |                  |                    |         |     |
| S196 |       | 27  | 23 | s58136.1         | OAR23_60124720.1   | 9675.72 | 139 |
| S196 |       | 29  | 23 | s58136.1         | OAR23_60124720.1   | 9675.72 | 139 |
| S196 |       | 507 | 23 | s47120.1         | OAR23_56845264.1   | 5236.32 | 78  |
| S196 |       | 844 | 23 | OAR23_52077991.1 | s45849.1           | 3992.95 | 58  |
| S196 |       | 45  | 23 | OAR23_55487746.1 | OAR23_58270558.1   | 2782.81 | 41  |
| S196 |       | 123 | 23 | OAR23_55806264.1 | OAR23_59401394.1   | 3595.13 | 53  |
| S196 | CON   | 6   | 23 | OAR23_55806264.1 | s45849.1           | 264.677 | 4   |
| S196 | UNION | 6   | 23 | s58136.1         | OAR23_60124720.1   | 9675.72 | 139 |

|      |       |     |    |                  |                    |         |     |
|------|-------|-----|----|------------------|--------------------|---------|-----|
| S199 |       | 616 | 22 | OAR22_5595255.1  | OAR22_7399531.1    | 1804.28 | 38  |
| S199 |       | 140 | 22 | s26220.1         | OAR22_5711915.1    | 5711.91 | 80  |
| S199 |       | 45  | 22 | OAR22_5711915.1  | OAR22_8033581.1    | 2321.67 | 47  |
| S199 |       | 829 | 22 | OAR22_4104153.1  | OAR22_6064565.1    | 1960.41 | 39  |
| S199 |       | 507 | 22 | s68573.1         | OAR22_8623862.1    | 8623.86 | 128 |
| S199 |       | 126 | 22 | OAR22_1250324.1  | OAR22_7588884.1    | 6338.56 | 102 |
| S199 | CON   | 6   | 22 | OAR22_5711915.1  | OAR22_5711915.1    | 0       | 1   |
| S199 | UNION | 6   | 22 | s26220.1         | OAR22_8623862.1    | 8623.86 | 139 |
|      |       |     |    |                  |                    |         |     |
| S200 |       | 702 | 21 | OAR21_38087037.1 | s49922.1           | 13700.7 | 160 |
| S200 |       | 507 | 21 | s26077.1         | s59900.1           | 2557.94 | 53  |
| S200 |       | 140 | 21 | s75799.1         | OAR21_38087037.1   | 2579.68 | 44  |
| S200 |       | 27  | 21 | s25809.1         | s13923.1           | 11828.3 | 168 |
| S200 |       | 90  | 21 | s75804.1         | s55303.1           | 6697.66 | 125 |
| S200 |       | 829 | 21 | OAR21_37641150.1 | OAR21_39223598.1   | 1582.45 | 32  |
| S200 | CON   | 6   | 21 | OAR21_38087037.1 | OAR21_38087037.1   | 0       | 1   |
| S200 | UNION | 6   | 21 | s25809.1         | s49922.1           | 19364.6 | 265 |
|      |       |     |    |                  |                    |         |     |
| S201 |       | 45  | 21 | OAR21_33336974.1 | OAR21_36484190_X.1 | 3147.22 | 53  |
| S201 |       | 556 | 21 | s68739.1         | OAR21_34906939.1   | 1760.9  | 38  |
| S201 |       | 79  | 21 | OAR21_33044180.1 | s61235.1           | 3111.66 | 57  |
| S201 |       | 606 | 21 | OAR21_21865772.1 | OAR21_36571389.1   | 14705.6 | 232 |
| S201 |       | 27  | 21 | s25809.1         | s13923.1           | 11828.3 | 168 |
| S201 |       | 90  | 21 | s75804.1         | s55303.1           | 6697.66 | 125 |
| S201 | CON   | 6   | 21 | OAR21_33336974.1 | OAR21_34906939.1   | 1569.96 | 33  |
| S201 | UNION | 6   | 21 | OAR21_21865772.1 | s13923.1           | 22385.7 | 328 |
|      |       |     |    |                  |                    |         |     |
| S202 |       | 844 | 21 | OAR21_23862060.1 | s47821.1           | 8308.09 | 126 |
| S202 |       | 140 | 21 | OAR21_21752249.1 | OAR21_24084777.1   | 2332.53 | 39  |
| S202 |       | 45  | 21 | OAR21_19280450.1 | OAR21_24102988.1   | 4822.54 | 78  |
| S202 |       | 49  | 21 | s74518.1         | s38134.1           | 13941.9 | 212 |
| S202 |       | 79  | 21 | OAR21_16500504.1 | OAR21_24084777.1   | 7584.27 | 125 |
| S202 |       | 606 | 21 | OAR21_21865772.1 | OAR21_36571389.1   | 14705.6 | 232 |
| S202 | CON   | 6   | 21 | OAR21_23862060.1 | OAR21_24084777.1   | 222.717 | 7   |
| S202 | UNION | 6   | 21 | OAR21_16500504.1 | OAR21_36571389.1   | 20070.9 | 319 |
|      |       |     |    |                  |                    |         |     |
| S203 |       | 507 | 19 | OAR19_14916596.1 | OAR19_17059871.1   | 2143.28 | 42  |
| S203 |       | 79  | 19 | OAR19_14916596.1 | OAR19_16594474.1   | 1677.88 | 33  |
| S203 |       | 629 | 19 | OAR19_13260250.1 | OAR19_15065899.1   | 1805.65 | 32  |
| S203 |       | 627 | 19 | s40605.1         | OAR19_15065899.1   | 2211.24 | 41  |
| S203 |       | 61  | 19 | OAR19_10268706.1 | s25958.1           | 4848.61 | 90  |
| S203 |       | 702 | 19 | OAR19_7253713.1  | s27711.1           | 16961.5 | 313 |
| S203 | CON   | 6   | 19 | OAR19_14916596.1 | OAR19_15065899.1   | 149.303 | 3   |
| S203 | UNION | 6   | 19 | OAR19_7253713.1  | s27711.1           | 16961.5 | 313 |
|      |       |     |    |                  |                    |         |     |
| S204 |       | 79  | 18 | s19585.1         | s20451.1           | 2188.81 | 41  |
| S204 |       | 844 | 18 | OAR18_66384520.1 | s52137.1           | 1484.08 | 32  |
| S204 |       | 29  | 18 | s07565.1         | s67955.1           | 1775.03 | 40  |
| S204 |       | 507 | 18 | OAR18_65660908.1 | OAR18_68832375.1   | 3171.47 | 67  |
| S204 |       | 627 | 18 | s28124.1         | s67734.1           | 2172.87 | 45  |
| S204 |       | 90  | 18 | s25861.1         | s27043.1           | 5385.42 | 82  |
| S204 | CON   | 6   | 18 | s19585.1         | s52137.1           | 545.822 | 10  |
| S204 | UNION | 6   | 18 | OAR18_65660908.1 | s27043.1           | 6819.35 | 115 |

|      |       |     |    |                  |                  |         |     |
|------|-------|-----|----|------------------|------------------|---------|-----|
| S205 |       | 140 | 18 | OAR18_51628425.1 | OAR18_53728497.1 | 2100.07 | 32  |
| S205 |       | 627 | 18 | OAR18_51628425.1 | OAR18_53590500.1 | 1962.08 | 30  |
| S205 |       | 29  | 18 | OAR18_51313531.1 | OAR18_53728497.1 | 2414.97 | 40  |
| S205 |       | 152 | 18 | OAR18_51594268.1 | OAR18_55121773.1 | 3527.51 | 53  |
| S205 |       | 606 | 18 | OAR18_52219091.1 | s59424.1         | 5545.32 | 70  |
| S205 |       | 507 | 18 | OAR18_52361774.1 | OAR18_56351698.1 | 3989.92 | 47  |
| S205 | CON   | 6   | 18 | OAR18_52361774.1 | OAR18_53590500.1 | 1228.73 | 14  |
| S205 | UNION | 6   | 18 | OAR18_51313531.1 | s59424.1         | 6450.88 | 91  |
| S206 |       | 829 | 17 | s44509.1         | s69675.1         | 5770.21 | 91  |
| S206 |       | 152 | 17 | s44509.1         | s33211.1         | 2693.86 | 44  |
| S206 |       | 507 | 17 | s47176.1         | s49020.1         | 26754.9 | 433 |
| S206 |       | 702 | 17 | OAR17_36966397.1 | OAR17_74039265.1 | 37072.9 | 600 |
| S206 |       | 79  | 17 | OAR17_55061923.1 | OAR17_62559974.1 | 7498.05 | 120 |
| S206 |       | 627 | 17 | OAR17_53440227.1 | s65370.1         | 1678.53 | 30  |
| S206 | CON   | 6   | 17 | OAR17_55061923.1 | s65370.1         | 56.831  | 2   |
| S206 | UNION | 6   | 17 | OAR17_36966397.1 | OAR17_74039265.1 | 37072.9 | 600 |
| S207 |       | 844 | 16 | OAR16_13101603.1 | OAR16_16543821.1 | 3442.22 | 62  |
| S207 |       | 79  | 16 | s46646.1         | OAR16_13101603.1 | 2266.33 | 44  |
| S207 |       | 123 | 16 | OAR16_12276858.1 | OAR16_13935744.1 | 1658.89 | 36  |
| S207 |       | 702 | 16 | OAR16_11050320.1 | OAR16_20062365.1 | 9012.05 | 173 |
| S207 |       | 29  | 16 | OAR16_11445590.1 | OAR16_15329984.1 | 3884.39 | 78  |
| S207 |       | 90  | 16 | OAR16_12311919.1 | s45825.1         | 1470.32 | 33  |
| S207 | CON   | 6   | 16 | OAR16_13101603.1 | OAR16_13101603.1 | 0       | 1   |
| S207 | UNION | 6   | 16 | s46646.1         | OAR16_20062365.1 | 9227.09 | 175 |
| S208 |       | 123 | 16 | OAR16_12276858.1 | OAR16_13935744.1 | 1658.89 | 36  |
| S208 |       | 702 | 16 | OAR16_11050320.1 | OAR16_20062365.1 | 9012.05 | 173 |
| S208 |       | 79  | 16 | s46646.1         | OAR16_13101603.1 | 2266.33 | 44  |
| S208 |       | 616 | 16 | OAR16_10423797.1 | OAR16_12590773.1 | 2166.98 | 39  |
| S208 |       | 29  | 16 | OAR16_11445590.1 | OAR16_15329984.1 | 3884.39 | 78  |
| S208 |       | 90  | 16 | OAR16_12311919.1 | s45825.1         | 1470.32 | 33  |
| S208 | CON   | 6   | 16 | OAR16_12311919.1 | OAR16_12590773.1 | 278.854 | 5   |
| S208 | UNION | 6   | 16 | OAR16_10423797.1 | OAR16_20062365.1 | 9638.57 | 184 |
| S209 |       | 29  | 15 | OAR15_73660126.1 | OAR15_75673025.1 | 2012.9  | 35  |
| S209 |       | 829 | 15 | OAR15_73610660.1 | OAR15_77297861.1 | 3687.2  | 75  |
| S209 |       | 507 | 15 | s65800.1         | s24876.1         | 2625.56 | 43  |
| S209 |       | 606 | 15 | s60467.1         | s57222.1         | 4219.52 | 71  |
| S209 |       | 629 | 15 | OAR15_70639412.1 | OAR15_74238319.1 | 3598.91 | 64  |
| S209 |       | 702 | 15 | OAR15_71907029.1 | OAR15_76144996.1 | 4237.97 | 71  |
| S209 | CON   | 6   | 15 | OAR15_73660126.1 | OAR15_74238319.1 | 578.193 | 12  |
| S209 | UNION | 6   | 15 | OAR15_70639412.1 | OAR15_77297861.1 | 6658.45 | 126 |
| S210 |       | 45  | 15 | s54590.1         | OAR15_72854094.1 | 2193.47 | 40  |
| S210 |       | 507 | 15 | s36214.1         | OAR15_72854094.1 | 2761.84 | 49  |
| S210 |       | 606 | 15 | s60467.1         | s57222.1         | 4219.52 | 71  |
| S210 |       | 629 | 15 | OAR15_70639412.1 | OAR15_74238319.1 | 3598.91 | 64  |
| S210 |       | 49  | 15 | s33931.1         | OAR15_72412908.1 | 2808.28 | 55  |
| S210 |       | 702 | 15 | OAR15_71907029.1 | OAR15_76144996.1 | 4237.97 | 71  |
| S210 | CON   | 6   | 15 | s60467.1         | OAR15_72412908.1 | 45.23   | 2   |
| S210 | UNION | 6   | 15 | s33931.1         | s57222.1         | 6982.57 | 124 |
| S218 |       | 27  | 15 | OAR15_50594253.1 | s18566.1         | 9220.78 | 110 |

|      |       |     |    |                    |                  |         |     |
|------|-------|-----|----|--------------------|------------------|---------|-----|
| S218 |       | 616 | 15 | OAR15_49569253.1   | OAR15_56883596.1 | 7314.34 | 74  |
| S218 |       | 629 | 15 | s45046.1           | OAR15_53192586.1 | 6195.51 | 50  |
| S218 |       | 606 | 15 | OAR15_46501057.1   | s04139.1         | 4370.39 | 54  |
| S218 |       | 40  | 15 | OAR15_43565431.1   | s34379.1         | 9826.51 | 115 |
| S218 |       | 627 | 15 | OAR15_41465316.1   | OAR15_53192586.1 | 11727.3 | 150 |
| S218 | CON   | 6   | 15 | OAR15_50594253.1   | s04139.1         | 277.19  | 3   |
| S218 | UNION | 6   | 15 | OAR15_41465316.1   | s18566.1         | 18349.7 | 254 |
| S221 |       | 606 | 15 | OAR15_46501057.1   | s04139.1         | 4370.39 | 54  |
| S221 |       | 844 | 15 | DU426312_454.1     | OAR15_49170452.1 | 2798.33 | 41  |
| S221 |       | 140 | 15 | s20575.1           | OAR15_49170452.1 | 3200.37 | 47  |
| S221 |       | 40  | 15 | OAR15_43565431.1   | s34379.1         | 9826.51 | 115 |
| S221 |       | 629 | 15 | s45046.1           | OAR15_53192586.1 | 6195.51 | 50  |
| S221 |       | 627 | 15 | OAR15_41465316.1   | OAR15_53192586.1 | 11727.3 | 150 |
| S221 | CON   | 6   | 15 | s45046.1           | OAR15_49170452.1 | 2173.37 | 31  |
| S221 | UNION | 6   | 15 | OAR15_41465316.1   | s34379.1         | 11926.6 | 153 |
| S223 |       | 606 | 15 | OAR15_46501057.1   | s04139.1         | 4370.39 | 54  |
| S223 |       | 844 | 15 | DU426312_454.1     | OAR15_49170452.1 | 2798.33 | 41  |
| S223 |       | 140 | 15 | s20575.1           | OAR15_49170452.1 | 3200.37 | 47  |
| S223 |       | 40  | 15 | OAR15_43565431.1   | s34379.1         | 9826.51 | 115 |
| S223 |       | 90  | 15 | OAR15_41465316.1   | OAR15_46781842.1 | 5316.53 | 97  |
| S223 |       | 627 | 15 | OAR15_41465316.1   | OAR15_53192586.1 | 11727.3 | 150 |
| S223 | CON   | 6   | 15 | OAR15_46501057.1   | OAR15_46781842.1 | 280.785 | 4   |
| S223 | UNION | 6   | 15 | OAR15_41465316.1   | s34379.1         | 11926.6 | 153 |
| S224 |       | 702 | 14 | s52270.1           | s56709.1         | 2277.8  | 36  |
| S224 |       | 90  | 14 | OAR14_55447588.1   | OAR14_58537282.1 | 3089.69 | 43  |
| S224 |       | 140 | 14 | OAR14_54070310.1   | OAR14_56421333.1 | 2351.02 | 30  |
| S224 |       | 49  | 14 | s42994.1           | s41160.1         | 2649.81 | 37  |
| S224 |       | 126 | 14 | s39024.1           | s04653.1         | 4645.22 | 62  |
| S224 |       | 152 | 14 | OAR14_52929077.1   | OAR14_56868551.1 | 3939.47 | 57  |
| S224 | CON   | 6   | 14 | s52270.1           | OAR14_56421333.1 | 64.195  | 2   |
| S224 | UNION | 6   | 14 | s39024.1           | s56709.1         | 6483.76 | 92  |
| S225 |       | 152 | 14 | s39747.1           | OAR14_27841684.1 | 3193.62 | 54  |
| S225 |       | 123 | 14 | s39747.1           | OAR14_27342805.1 | 2694.74 | 42  |
| S225 |       | 629 | 14 | OAR14_24191061.1   | OAR14_28394503.1 | 4203.44 | 73  |
| S225 |       | 49  | 14 | s48615.1           | OAR14_33475732.1 | 10584   | 174 |
| S225 |       | 702 | 14 | s22016.1           | s49153.1         | 8137.25 | 142 |
| S225 |       | 606 | 14 | s68592.1           | OAR14_27152874.1 | 3078    | 49  |
| S225 | CON   | 6   | 14 | s39747.1           | s49153.1         | 1391.17 | 17  |
| S225 | UNION | 6   | 14 | s22016.1           | OAR14_33475732.1 | 15573.7 | 265 |
| S228 |       | 27  | 13 | s57248.1           | OAR13_87964841.1 | 3134.51 | 57  |
| S228 |       | 844 | 13 | OAR13_82596775_X.1 | s66542.1         | 3352.33 | 60  |
| S228 |       | 702 | 13 | OAR13_82596775_X.1 | s37902.1         | 2628.29 | 51  |
| S228 |       | 140 | 13 | OAR13_85176472.1   | OAR13_89063022.1 | 3886.55 | 70  |
| S228 |       | 45  | 13 | OAR13_82895452.1   | OAR13_85176472.1 | 2281.02 | 45  |
| S228 |       | 507 | 13 | OAR13_82659110.1   | OAR13_89063022.1 | 6403.91 | 118 |
| S228 | CON   | 6   | 13 | OAR13_85176472.1   | OAR13_85176472.1 | 0       | 1   |
| S228 | UNION | 6   | 13 | OAR13_82596775_X.1 | OAR13_89063022.1 | 6466.25 | 119 |
| S229 |       | 90  | 13 | s03928.1           | s05093.1         | 1659.03 | 33  |
| S229 |       | 507 | 13 | OAR13_82659110.1   | OAR13_89063022.1 | 6403.91 | 118 |

|      |       |     |    |                    |                  |         |      |
|------|-------|-----|----|--------------------|------------------|---------|------|
| S229 |       | 844 | 13 | OAR13_82596775_X.1 | s66542.1         | 3352.33 | 60   |
| S229 |       | 702 | 13 | OAR13_82596775_X.1 | s37902.1         | 2628.29 | 51   |
| S229 |       | 616 | 13 | OAR13_81897604.1   | s03117.1         | 1965.48 | 36   |
| S229 |       | 45  | 13 | OAR13_82895452.1   | OAR13_85176472.1 | 2281.02 | 45   |
| S229 | CON   | 6   | 13 | s03928.1           | s03117.1         | 740.826 | 14   |
| S229 | UNION | 6   | 13 | OAR13_81897604.1   | OAR13_89063022.1 | 7165.42 | 132  |
| S236 |       | 79  | 13 | s74098.1           | s07261.1         | 2464.24 | 39   |
| S236 |       | 801 | 13 | OAR13_40723732.1   | OAR13_44858092.1 | 4134.36 | 68   |
| S236 |       | 45  | 13 | OAR13_39447377.1   | s32471.1         | 2176.24 | 31   |
| S236 |       | 49  | 13 | OAR13_39447377.1   | s32471.1         | 2176.24 | 31   |
| S236 |       | 556 | 13 | s18674.1           | OAR13_44631782.1 | 5987.19 | 98   |
| S236 |       | 29  | 13 | OAR13_39146165.1   | OAR13_41484865.1 | 2338.7  | 37   |
| S236 | CON   | 6   | 13 | s74098.1           | OAR13_41484865.1 | 280.539 | 5    |
| S236 | UNION | 6   | 13 | s18674.1           | OAR13_44858092.1 | 6213.5  | 103  |
| S238 |       | 90  | 13 | OAR13_31557833.1   | OAR13_35413855.1 | 3856.02 | 66   |
| S238 |       | 152 | 13 | OAR13_29150493.1   | OAR13_33035124.1 | 3884.63 | 69   |
| S238 |       | 27  | 13 | s73266.1           | s57045.1         | 4828.41 | 91   |
| S238 |       | 29  | 13 | s62936.1           | OAR13_35198687.1 | 9473.28 | 175  |
| S238 |       | 829 | 13 | s29601.1           | OAR13_37876562.1 | 14843.5 | 275  |
| S238 |       | 123 | 13 | s05740.1           | OAR13_33983722.1 | 4640.74 | 88   |
| S238 | CON   | 6   | 13 | OAR13_31557833.1   | s57045.1         | 618.773 | 11   |
| S238 | UNION | 6   | 13 | s29601.1           | OAR13_37876562.1 | 14843.5 | 275  |
| S239 |       | 606 | 13 | OAR13_22595627.1   | OAR13_26635884.1 | 4040.26 | 80   |
| S239 |       | 629 | 13 | OAR13_22595627.1   | OAR13_26635884.1 | 4040.26 | 80   |
| S239 |       | 49  | 13 | OAR13_21176498.1   | OAR13_26177858.1 | 5001.36 | 93   |
| S239 |       | 61  | 13 | OAR13_20869936.1   | OAR13_22642702.1 | 1772.77 | 33   |
| S239 |       | 616 | 13 | OAR13_19366874.1   | s47163.1         | 7083.23 | 139  |
| S239 |       | 123 | 13 | s43905.1           | OAR13_26635884.1 | 6436.53 | 127  |
| S239 | CON   | 6   | 13 | OAR13_22595627.1   | OAR13_22642702.1 | 47.075  | 2    |
| S239 | UNION | 6   | 13 | OAR13_19366874.1   | OAR13_26635884.1 | 7269.01 | 144  |
| S242 |       | 606 | 12 | s49565.1           | OAR12_63132677.1 | 1788.24 | 36   |
| S242 |       | 90  | 12 | OAR12_58680505.1   | OAR12_61974786.1 | 3294.28 | 48   |
| S242 |       | 627 | 12 | s05958.1           | OAR12_61618681.1 | 8919.27 | 136  |
| S242 |       | 629 | 12 | s05958.1           | OAR12_61618681.1 | 8919.27 | 136  |
| S242 |       | 123 | 12 | OAR12_30882746.1   | OAR12_62371899.1 | 31489.2 | 574  |
| S242 |       | 702 | 12 | s22960.1           | s60710.1         | 58755.9 | 1088 |
| S242 | CON   | 6   | 12 | s49565.1           | OAR12_61618681.1 | 274.248 | 6    |
| S242 | UNION | 6   | 12 | s22960.1           | s60710.1         | 58755.9 | 1088 |
| S243 |       | 627 | 12 | s05958.1           | OAR12_61618681.1 | 8919.27 | 136  |
| S243 |       | 629 | 12 | s05958.1           | OAR12_61618681.1 | 8919.27 | 136  |
| S243 |       | 123 | 12 | OAR12_30882746.1   | OAR12_62371899.1 | 31489.2 | 574  |
| S243 |       | 29  | 12 | s38264.1           | s74943.1         | 2477.01 | 48   |
| S243 |       | 801 | 12 | s52537.1           | s15193.1         | 2447.59 | 48   |
| S243 |       | 702 | 12 | s22960.1           | s60710.1         | 58755.9 | 1088 |
| S243 | CON   | 6   | 12 | s38264.1           | s15193.1         | 48.518  | 2    |
| S243 | UNION | 6   | 12 | s22960.1           | s60710.1         | 58755.9 | 1088 |
| S244 |       | 801 | 12 | s52537.1           | s15193.1         | 2447.59 | 48   |
| S244 |       | 45  | 12 | OAR12_49617704.1   | OAR12_51498192.1 | 1880.49 | 37   |
| S244 |       | 627 | 12 | s63637.1           | OAR12_51498192.1 | 2978.12 | 59   |

|      |       |     |    |                  |                    |         |      |
|------|-------|-----|----|------------------|--------------------|---------|------|
| S244 |       | 629 | 12 | s63637.1         | OAR12_51498192.1   | 2978.12 | 59   |
| S244 |       | 123 | 12 | OAR12_30882746.1 | OAR12_62371899.1   | 31489.2 | 574  |
| S244 |       | 702 | 12 | s22960.1         | s60710.1           | 58755.9 | 1088 |
| S244 | CON   | 6   | 12 | s52537.1         | OAR12_51498192.1   | 564.148 | 10   |
| S244 | UNION | 6   | 12 | s22960.1         | s60710.1           | 58755.9 | 1088 |
|      |       |     |    |                  |                    |         |      |
| S245 |       | 126 | 12 | s35634.1         | s14364.1           | 1775.17 | 30   |
| S245 |       | 123 | 12 | OAR12_30882746.1 | OAR12_62371899.1   | 31489.2 | 574  |
| S245 |       | 702 | 12 | s22960.1         | s60710.1           | 58755.9 | 1088 |
| S245 |       | 606 | 12 | OAR12_43758965.1 | OAR12_49228109.1   | 5469.14 | 102  |
| S245 |       | 90  | 12 | s71547.1         | s44148.1           | 2398.95 | 43   |
| S245 |       | 152 | 12 | OAR12_46087352.1 | s29250.1           | 2063.39 | 34   |
| S245 | CON   | 6   | 12 | OAR12_46087352.1 | s44148.1           | 906.443 | 14   |
| S245 | UNION | 6   | 12 | s22960.1         | s60710.1           | 58755.9 | 1088 |
|      |       |     |    |                  |                    |         |      |
| S246 |       | 629 | 12 | OAR12_21022562.1 | OAR12_22840561.1   | 1818    | 37   |
| S246 |       | 140 | 12 | OAR12_20168901.1 | OAR12_22539169.1   | 2370.27 | 50   |
| S246 |       | 27  | 12 | OAR12_20168901.1 | OAR12_21638552.1   | 1469.65 | 30   |
| S246 |       | 616 | 12 | OAR12_18138547.1 | OAR12_21638552.1   | 3500.01 | 74   |
| S246 |       | 507 | 12 | s13792.1         | s57817.1           | 31188.2 | 514  |
| S246 |       | 702 | 12 | s22960.1         | s60710.1           | 58755.9 | 1088 |
| S246 | CON   | 6   | 12 | OAR12_21022562.1 | OAR12_21638552.1   | 615.99  | 13   |
| S246 | UNION | 6   | 12 | s13792.1         | s60710.1           | 71900.8 | 1272 |
|      |       |     |    |                  |                    |         |      |
| S249 |       | 140 | 12 | OAR12_20168901.1 | OAR12_22539169.1   | 2370.27 | 50   |
| S249 |       | 27  | 12 | OAR12_20168901.1 | OAR12_21638552.1   | 1469.65 | 30   |
| S249 |       | 616 | 12 | OAR12_18138547.1 | OAR12_21638552.1   | 3500.01 | 74   |
| S249 |       | 45  | 12 | OAR12_16839464.1 | OAR12_20195850.1   | 3356.39 | 72   |
| S249 |       | 507 | 12 | s13792.1         | s57817.1           | 31188.2 | 514  |
| S249 |       | 702 | 12 | s22960.1         | s60710.1           | 58755.9 | 1088 |
| S249 | CON   | 6   | 12 | OAR12_20168901.1 | OAR12_20195850.1   | 26.949  | 2    |
| S249 | UNION | 6   | 12 | s13792.1         | s60710.1           | 71900.8 | 1272 |
|      |       |     |    |                  |                    |         |      |
| S252 |       | 79  | 11 | s47275.1         | OAR11_21925396.1   | 2007.05 | 32   |
| S252 |       | 45  | 11 | s52587.1         | OAR11_21925396.1   | 2718.17 | 43   |
| S252 |       | 829 | 11 | s00452.1         | s27347.1           | 1796.09 | 37   |
| S252 |       | 140 | 11 | s32976.1         | OAR11_21925396.1   | 3582.11 | 65   |
| S252 |       | 702 | 11 | OAR11_17172323.1 | OAR11_33359712.1   | 16187.4 | 260  |
| S252 |       | 123 | 11 | s17310.1         | OAR11_29271153.1   | 9483.93 | 143  |
| S252 | CON   | 6   | 11 | s47275.1         | s27347.1           | 280.355 | 6    |
| S252 | UNION | 6   | 11 | OAR11_17172323.1 | OAR11_33359712.1   | 16187.4 | 260  |
|      |       |     |    |                  |                    |         |      |
| S253 |       | 123 | 11 | s17310.1         | OAR11_29271153.1   | 9483.93 | 143  |
| S253 |       | 45  | 11 | s52587.1         | OAR11_21925396.1   | 2718.17 | 43   |
| S253 |       | 140 | 11 | s32976.1         | OAR11_21925396.1   | 3582.11 | 65   |
| S253 |       | 79  | 11 | s32976.1         | s33117.1           | 1526.31 | 32   |
| S253 |       | 702 | 11 | OAR11_17172323.1 | OAR11_33359712.1   | 16187.4 | 260  |
| S253 |       | 829 | 11 | s00452.1         | s27347.1           | 1796.09 | 37   |
| S253 | CON   | 6   | 11 | s17310.1         | s33117.1           | 82.375  | 4    |
| S253 | UNION | 6   | 11 | OAR11_17172323.1 | OAR11_33359712.1   | 16187.4 | 260  |
|      |       |     |    |                  |                    |         |      |
| S254 |       | 29  | 10 | OAR10_59323880.1 | OAR10_62073309_X.1 | 2749.43 | 37   |
| S254 |       | 27  | 10 | OAR10_58094557.1 | OAR10_62988399.1   | 4893.84 | 90   |
| S254 |       | 157 | 10 | OAR10_57171204.1 | OAR10_62988399.1   | 5817.19 | 110  |
| S254 |       | 152 | 10 | OAR10_56312119.1 | OAR10_72914358.1   | 16602.2 | 277  |



|      |       |     |    |                  |                  |         |     |
|------|-------|-----|----|------------------|------------------|---------|-----|
| S254 |       | 507 | 10 | OAR10_54127756.1 | s31288.1         | 7114.03 | 124 |
| S254 |       | 90  | 10 | s25185.1         | OAR10_68005037.1 | 11797.8 | 188 |
| S254 | CON   | 6   | 10 | OAR10_59323880.1 | s31288.1         | 1917.9  | 22  |
| S254 | UNION | 6   | 10 | OAR10_54127756.1 | OAR10_72914358.1 | 18786.6 | 320 |
| S255 |       | 629 | 10 | s45528.1         | s10365.1         | 1833.37 | 34  |
| S255 |       | 79  | 10 | OAR10_19841785.1 | OAR10_22164858.1 | 2323.07 | 43  |
| S255 |       | 45  | 10 | OAR10_17232091.1 | s09543.1         | 3126.98 | 55  |
| S255 |       | 123 | 10 | OAR10_17232091.1 | OAR10_20247297.1 | 3015.21 | 54  |
| S255 |       | 702 | 10 | s49567.1         | OAR10_48462141.1 | 48462.1 | 914 |
| S255 |       | 844 | 10 | OAR10_17703888.1 | s09622.1         | 13279.3 | 268 |
| S255 | CON   | 6   | 10 | s45528.1         | OAR10_20247297.1 | 360.637 | 8   |
| S255 | UNION | 6   | 10 | s49567.1         | OAR10_48462141.1 | 48462.1 | 914 |
| S256 |       | 49  | 9  | OAR9_33777151.1  | s71002.1         | 1328.61 | 32  |
| S256 |       | 606 | 9  | OAR9_32239874.1  | DU427730_369.1   | 4216.13 | 94  |
| S256 |       | 123 | 9  | OAR9_32131604.1  | OAR9_34495564.1  | 2363.96 | 53  |
| S256 |       | 79  | 9  | s73465.1         | OAR9_40771150.1  | 8319.46 | 179 |
| S256 |       | 45  | 9  | OAR9_26972939.1  | OAR9_35203437.1  | 8230.5  | 170 |
| S256 |       | 61  | 9  | OAR9_31664097.1  | OAR9_36052313.1  | 4388.22 | 101 |
| S256 | CON   | 6   | 9  | OAR9_33777151.1  | OAR9_34495564.1  | 718.413 | 18  |
| S256 | UNION | 6   | 9  | OAR9_26972939.1  | OAR9_40771150.1  | 13798.2 | 283 |
| S259 |       | 27  | 9  | s30783.1         | OAR9_32605349.1  | 3103.89 | 69  |
| S259 |       | 79  | 9  | s73465.1         | OAR9_40771150.1  | 8319.46 | 179 |
| S259 |       | 45  | 9  | OAR9_26972939.1  | OAR9_35203437.1  | 8230.5  | 170 |
| S259 |       | 606 | 9  | OAR9_32239874.1  | DU427730_369.1   | 4216.13 | 94  |
| S259 |       | 123 | 9  | OAR9_32131604.1  | OAR9_34495564.1  | 2363.96 | 53  |
| S259 |       | 61  | 9  | OAR9_31664097.1  | OAR9_36052313.1  | 4388.22 | 101 |
| S259 | CON   | 6   | 9  | s73465.1         | OAR9_32605349.1  | 153.655 | 4   |
| S259 | UNION | 6   | 9  | OAR9_26972939.1  | OAR9_40771150.1  | 13798.2 | 283 |
| S262 |       | 627 | 8  | OAR8_37276015.1  | OAR8_39847976.1  | 2571.96 | 50  |
| S262 |       | 629 | 8  | OAR8_37276015.1  | OAR8_39847976.1  | 2571.96 | 50  |
| S262 |       | 844 | 8  | OAR8_35694056.1  | OAR8_37524612.1  | 1830.56 | 40  |
| S262 |       | 123 | 8  | OAR8_34202419.1  | OAR8_45617687.1  | 11415.3 | 218 |
| S262 |       | 61  | 8  | s42406.1         | OAR8_37553450.1  | 5987.56 | 109 |
| S262 |       | 702 | 8  | OAR8_26793121.1  | OAR8_38710483.1  | 11917.4 | 231 |
| S262 | CON   | 6   | 8  | OAR8_37276015.1  | OAR8_37524612.1  | 248.597 | 3   |
| S262 | UNION | 6   | 8  | OAR8_26793121.1  | OAR8_45617687.1  | 18824.6 | 363 |
| S263 |       | 616 | 7  | s03655.1         | OAR7_83970535.1  | 2138.66 | 41  |
| S263 |       | 606 | 7  | s20865.1         | s35464.1         | 1561.95 | 33  |
| S263 |       | 29  | 7  | s20865.1         | OAR7_83073383.1  | 1353.51 | 30  |
| S263 |       | 844 | 7  | s03357.1         | s61284.1         | 4208.81 | 84  |
| S263 |       | 61  | 7  | OAR7_79189143.1  | s15556.1         | 5289.18 | 104 |
| S263 |       | 123 | 7  | s13905.1         | OAR7_91483736.1  | 9054.19 | 169 |
| S263 | CON   | 6   | 7  | s13905.1         | OAR7_83073383.1  | 643.839 | 12  |
| S263 | UNION | 6   | 7  | OAR7_79189143.1  | OAR7_91483736.1  | 12294.6 | 237 |
| S264 |       | 801 | 7  | OAR7_57790006.1  | OAR7_60473904.1  | 2683.9  | 54  |
| S264 |       | 507 | 7  | OAR7_52043940.1  | OAR7_71832636.1  | 19788.7 | 355 |
| S264 |       | 45  | 7  | OAR7_31172405.1  | OAR7_58958307.1  | 27785.9 | 542 |
| S264 |       | 702 | 7  | OAR7_31685912.1  | OAR7_72973471.1  | 41287.6 | 769 |
| S264 |       | 616 | 7  | OAR7_54780217.1  | s36119.1         | 5323.48 | 103 |

|      |       |     |   |                  |                  |         |     |
|------|-------|-----|---|------------------|------------------|---------|-----|
| S264 |       | 29  | 7 | OAR7_56240366.1  | OAR7_77667178.1  | 21426.8 | 390 |
| S264 | CON   | 6   | 7 | OAR7_57790006.1  | OAR7_58958307.1  | 1168.3  | 26  |
| S264 | UNION | 6   | 7 | OAR7_31172405.1  | OAR7_77667178.1  | 46494.8 | 878 |
| S265 |       | 507 | 7 | OAR7_52043940.1  | OAR7_71832636.1  | 19788.7 | 355 |
| S265 |       | 844 | 7 | OAR7_50718877.1  | OAR7_52124140.1  | 1405.26 | 30  |
| S265 |       | 616 | 7 | OAR7_50594184.1  | OAR7_52043940.1  | 1449.76 | 31  |
| S265 |       | 45  | 7 | OAR7_31172405.1  | OAR7_58958307.1  | 27785.9 | 542 |
| S265 |       | 702 | 7 | OAR7_31685912.1  | OAR7_72973471.1  | 41287.6 | 769 |
| S265 |       | 27  | 7 | OAR7_51824628.1  | s56915.1         | 1393.42 | 30  |
| S265 | CON   | 6   | 7 | OAR7_52043940.1  | OAR7_52043940.1  | 0       | 1   |
| S265 | UNION | 6   | 7 | OAR7_31172405.1  | OAR7_72973471.1  | 41801.1 | 782 |
| S266 |       | 801 | 7 | s15119.1         | OAR7_40985103.1  | 1282.67 | 32  |
| S266 |       | 616 | 7 | OAR7_39499497.1  | OAR7_40869088.1  | 1369.59 | 35  |
| S266 |       | 140 | 7 | s56284.1         | OAR7_39885967.1  | 2987.33 | 57  |
| S266 |       | 45  | 7 | OAR7_31172405.1  | OAR7_58958307.1  | 27785.9 | 542 |
| S266 |       | 702 | 7 | OAR7_31685912.1  | OAR7_72973471.1  | 41287.6 | 769 |
| S266 |       | 61  | 7 | OAR7_38702831.1  | s18956.1         | 1507.44 | 35  |
| S266 | CON   | 6   | 7 | s15119.1         | OAR7_39885967.1  | 183.539 | 4   |
| S266 | UNION | 6   | 7 | OAR7_31172405.1  | OAR7_72973471.1  | 41801.1 | 782 |
| S267 |       | 61  | 7 | OAR7_19080089.1  | s58125.1         | 1926.97 | 36  |
| S267 |       | 157 | 7 | OAR7_18037906.1  | s17110.1         | 1676.07 | 38  |
| S267 |       | 507 | 7 | OAR7_18037906.1  | s17110.1         | 1676.07 | 38  |
| S267 |       | 140 | 7 | s04477.1         | s17110.1         | 2008.95 | 47  |
| S267 |       | 79  | 7 | s04477.1         | s17110.1         | 2008.95 | 47  |
| S267 |       | 123 | 7 | s13188.1         | s71719.1         | 12317   | 181 |
| S267 | CON   | 6   | 7 | OAR7_19080089.1  | s17110.1         | 633.889 | 14  |
| S267 | UNION | 6   | 7 | s13188.1         | s71719.1         | 12317   | 181 |
| S271 |       | 801 | 6 | OAR6_120674641.1 | s42254.1         | 3373.02 | 61  |
| S271 |       | 45  | 6 | OAR6_119942135.1 | OAR6_122276062.1 | 2333.93 | 39  |
| S271 |       | 507 | 6 | OAR6_119942135.1 | OAR6_122276062.1 | 2333.93 | 39  |
| S271 |       | 61  | 6 | OAR6_119546066.1 | s55094.1         | 2796.93 | 50  |
| S271 |       | 606 | 6 | OAR6_119125205.1 | OAR6_121181023.1 | 2055.82 | 46  |
| S271 |       | 140 | 6 | s08027.1         | s18701.1         | 4432.34 | 84  |
| S271 | CON   | 6   | 6 | OAR6_120674641.1 | OAR6_121181023.1 | 506.382 | 10  |
| S271 | UNION | 6   | 6 | OAR6_119125205.1 | s42254.1         | 4922.45 | 97  |
| S272 |       | 157 | 6 | s63186.1         | OAR6_46455936.1  | 3277.03 | 62  |
| S272 |       | 140 | 6 | s73122.1         | OAR6_49463357.1  | 26607.7 | 513 |
| S272 |       | 627 | 6 | OAR6_42576838.1  | OAR6_44769116.1  | 2192.28 | 42  |
| S272 |       | 45  | 6 | OAR6_38919831.1  | OAR6_50590550.1  | 11670.7 | 219 |
| S272 |       | 702 | 6 | OAR6_6278702.1   | OAR6_45273992.1  | 38995.3 | 741 |
| S272 |       | 801 | 6 | OAR6_42763868.1  | s19086.1         | 1923.69 | 37  |
| S272 | CON   | 6   | 6 | s63186.1         | s19086.1         | 1508.66 | 28  |
| S272 | UNION | 6   | 6 | OAR6_6278702.1   | OAR6_50590550.1  | 44311.8 | 859 |
| S273 |       | 627 | 6 | OAR6_42576838.1  | OAR6_44769116.1  | 2192.28 | 42  |
| S273 |       | 45  | 6 | OAR6_38919831.1  | OAR6_50590550.1  | 11670.7 | 219 |
| S273 |       | 801 | 6 | OAR6_42763868.1  | s19086.1         | 1923.69 | 37  |
| S273 |       | 79  | 6 | OAR6_41044118.1  | OAR6_43034224.1  | 1990.11 | 37  |
| S273 |       | 702 | 6 | OAR6_6278702.1   | OAR6_45273992.1  | 38995.3 | 741 |
| S273 |       | 140 | 6 | s73122.1         | OAR6_49463357.1  | 26607.7 | 513 |

|      |       |     |   |                   |                  |         |     |
|------|-------|-----|---|-------------------|------------------|---------|-----|
| S273 | CON   | 6   | 6 | OAR6_42763868.1   | OAR6_43034224.1  | 270.356 | 7   |
| S273 | UNION | 6   | 6 | OAR6_6278702.1    | OAR6_50590550.1  | 44311.8 | 859 |
| S278 |       | 45  | 6 | OAR6_38919831.1   | OAR6_50590550.1  | 11670.7 | 219 |
| S278 |       | 844 | 6 | OAR6_38805979_X.1 | OAR6_42208195.1  | 3402.22 | 45  |
| S278 |       | 140 | 6 | s73122.1          | OAR6_49463357.1  | 26607.7 | 513 |
| S278 |       | 79  | 6 | OAR6_41044118.1   | OAR6_43034224.1  | 1990.11 | 37  |
| S278 |       | 829 | 6 | OAR6_39029427.1   | OAR6_41936490.1  | 2907.06 | 36  |
| S278 |       | 702 | 6 | OAR6_6278702.1    | OAR6_45273992.1  | 38995.3 | 741 |
| S278 | CON   | 6   | 6 | OAR6_41044118.1   | OAR6_41936490.1  | 892.372 | 14  |
| S278 | UNION | 6   | 6 | OAR6_6278702.1    | OAR6_50590550.1  | 44311.8 | 859 |
| S283 |       | 844 | 6 | OAR6_38805979_X.1 | OAR6_42208195.1  | 3402.22 | 45  |
| S283 |       | 140 | 6 | s73122.1          | OAR6_49463357.1  | 26607.7 | 513 |
| S283 |       | 45  | 6 | OAR6_38919831.1   | OAR6_50590550.1  | 11670.7 | 219 |
| S283 |       | 61  | 6 | OAR6_36486409_X.1 | s43499.1         | 3721.22 | 57  |
| S283 |       | 702 | 6 | OAR6_6278702.1    | OAR6_45273992.1  | 38995.3 | 741 |
| S283 |       | 829 | 6 | OAR6_39029427.1   | OAR6_41936490.1  | 2907.06 | 36  |
| S283 | CON   | 6   | 6 | OAR6_39029427.1   | s43499.1         | 1178.2  | 9   |
| S283 | UNION | 6   | 6 | OAR6_6278702.1    | OAR6_50590550.1  | 44311.8 | 859 |
| S284 |       | 829 | 6 | OAR6_30406285.1   | OAR6_33075221.1  | 2668.94 | 56  |
| S284 |       | 123 | 6 | s65803.1          | OAR6_35548649.1  | 7909.9  | 153 |
| S284 |       | 627 | 6 | OAR6_27463172_X.1 | OAR6_30478260.1  | 3015.09 | 53  |
| S284 |       | 629 | 6 | OAR6_27463172_X.1 | OAR6_30478260.1  | 3015.09 | 53  |
| S284 |       | 140 | 6 | s73122.1          | OAR6_49463357.1  | 26607.7 | 513 |
| S284 |       | 702 | 6 | OAR6_6278702.1    | OAR6_45273992.1  | 38995.3 | 741 |
| S284 | CON   | 6   | 6 | OAR6_30406285.1   | OAR6_30478260.1  | 71.975  | 3   |
| S284 | UNION | 6   | 6 | OAR6_6278702.1    | OAR6_49463357.1  | 43184.7 | 833 |
| S286 |       | 702 | 6 | OAR6_6278702.1    | OAR6_45273992.1  | 38995.3 | 741 |
| S286 |       | 152 | 6 | OAR6_6254316.1    | OAR6_10305227.1  | 4050.91 | 72  |
| S286 |       | 79  | 6 | s40472.1          | s30534.1         | 2475.33 | 38  |
| S286 |       | 507 | 6 | OAR6_4458962.1    | OAR6_6482986_X.1 | 2024.03 | 38  |
| S286 |       | 90  | 6 | OAR6_4458962.1    | s44871.1         | 4179.72 | 70  |
| S286 |       | 45  | 6 | OAR6_6211452.1    | OAR6_10161100.1  | 3949.65 | 69  |
| S286 | CON   | 6   | 6 | OAR6_6278702.1    | OAR6_6482986_X.1 | 204.285 | 5   |
| S286 | UNION | 6   | 6 | OAR6_4458962.1    | OAR6_45273992.1  | 40815   | 774 |
| S288 |       | 90  | 5 | DU444709_372.1    | OAR5_68350537.1  | 7925.86 | 122 |
| S288 |       | 79  | 5 | OAR5_57265711.1   | s17800.1         | 9271.25 | 138 |
| S288 |       | 152 | 5 | s12940.1          | OAR5_61924626.1  | 14110.5 | 253 |
| S288 |       | 629 | 5 | OAR5_57983508.1   | OAR5_71824766.1  | 13841.3 | 230 |
| S288 |       | 627 | 5 | OAR5_57983508.1   | OAR5_66325807.1  | 8342.3  | 120 |
| S288 |       | 801 | 5 | OAR5_59243774.1   | s14903.1         | 2840.84 | 35  |
| S288 | CON   | 6   | 5 | DU444709_372.1    | OAR5_61924626.1  | 1499.95 | 10  |
| S288 | UNION | 6   | 5 | s12940.1          | OAR5_71824766.1  | 24010.7 | 431 |
| S292 |       | 801 | 5 | OAR5_59243774.1   | s14903.1         | 2840.84 | 35  |
| S292 |       | 79  | 5 | OAR5_57265711.1   | s17800.1         | 9271.25 | 138 |
| S292 |       | 829 | 5 | s00980.1          | OAR5_59243774.1  | 5486.89 | 100 |
| S292 |       | 152 | 5 | s12940.1          | OAR5_61924626.1  | 14110.5 | 253 |
| S292 |       | 629 | 5 | OAR5_57983508.1   | OAR5_71824766.1  | 13841.3 | 230 |
| S292 |       | 627 | 5 | OAR5_57983508.1   | OAR5_66325807.1  | 8342.3  | 120 |
| S292 | CON   | 6   | 5 | OAR5_59243774.1   | OAR5_59243774.1  | 0       | 1   |

|      |       |     |   |                    |                 |         |     |
|------|-------|-----|---|--------------------|-----------------|---------|-----|
| S292 | UNION | 6   | 5 | s12940.1           | OAR5_71824766.1 | 24010.7 | 431 |
| S293 |       | 29  | 5 | s54250.1           | OAR5_58587196.1 | 3259.14 | 61  |
| S293 |       | 829 | 5 | s00980.1           | OAR5_59243774.1 | 5486.89 | 100 |
| S293 |       | 152 | 5 | s12940.1           | OAR5_61924626.1 | 14110.5 | 253 |
| S293 |       | 801 | 5 | OAR5_47774570.1    | s54250.1        | 7553.49 | 151 |
| S293 |       | 140 | 5 | OAR5_52351898.1    | OAR5_58830573.1 | 6478.68 | 118 |
| S293 |       | 702 | 5 | OAR5_53435489.1    | OAR5_55651844.1 | 2216.36 | 43  |
| S293 | CON   | 6   | 5 | s54250.1           | s54250.1        | 0       | 1   |
| S293 | UNION | 6   | 5 | OAR5_47774570.1    | OAR5_61924626.1 | 14150.1 | 254 |
| S294 |       | 507 | 4 | OAR4_76898220.1    | OAR4_83911244.1 | 7013.02 | 135 |
| S294 |       | 27  | 4 | OAR4_76552142.1    | OAR4_78216552.1 | 1664.41 | 33  |
| S294 |       | 29  | 4 | OAR4_74705318.1    | OAR4_78216552.1 | 3511.23 | 72  |
| S294 |       | 702 | 4 | s58367.1           | OAR4_85483475.1 | 25992.5 | 514 |
| S294 |       | 616 | 4 | OAR4_72367529.1    | OAR4_78991289.1 | 6623.76 | 132 |
| S294 |       | 627 | 4 | s56367.1           | OAR4_80229268.1 | 3866.18 | 75  |
| S294 | CON   | 6   | 4 | OAR4_76898220.1    | OAR4_78216552.1 | 1318.33 | 25  |
| S294 | UNION | 6   | 4 | s58367.1           | OAR4_85483475.1 | 25992.5 | 514 |
| S295 |       | 152 | 4 | OAR4_60126261.1    | OAR4_62657058.1 | 2530.8  | 55  |
| S295 |       | 45  | 4 | OAR4_55744716.1    | OAR4_60926085.1 | 5181.37 | 106 |
| S295 |       | 627 | 4 | OAR4_55669092.1    | OAR4_60497897.1 | 4828.81 | 98  |
| S295 |       | 27  | 4 | DU194821_342.1     | OAR4_61284730.1 | 14228.1 | 279 |
| S295 |       | 29  | 4 | DU194821_342.1     | OAR4_61284730.1 | 14228.1 | 279 |
| S295 |       | 702 | 4 | s58367.1           | OAR4_85483475.1 | 25992.5 | 514 |
| S295 | CON   | 6   | 4 | OAR4_60126261.1    | OAR4_60497897.1 | 371.636 | 9   |
| S295 | UNION | 6   | 4 | DU194821_342.1     | OAR4_85483475.1 | 38426.9 | 752 |
| S297 |       | 45  | 4 | OAR4_55744716.1    | OAR4_60926085.1 | 5181.37 | 106 |
| S297 |       | 606 | 4 | OAR4_37940876.1    | OAR4_55963926.1 | 18023   | 344 |
| S297 |       | 27  | 4 | DU194821_342.1     | OAR4_61284730.1 | 14228.1 | 279 |
| S297 |       | 29  | 4 | DU194821_342.1     | OAR4_61284730.1 | 14228.1 | 279 |
| S297 |       | 61  | 4 | OAR4_39813653.1    | OAR4_56340637.1 | 16527   | 308 |
| S297 |       | 627 | 4 | OAR4_55669092.1    | OAR4_60497897.1 | 4828.81 | 98  |
| S297 | CON   | 6   | 4 | OAR4_55744716.1    | OAR4_55963926.1 | 219.21  | 7   |
| S297 | UNION | 6   | 4 | OAR4_37940876.1    | OAR4_61284730.1 | 23343.9 | 451 |
| S298 |       | 629 | 4 | OAR4_46599830.1    | s05903.1        | 2265.52 | 38  |
| S298 |       | 45  | 4 | OAR4_43198108.1    | s67196.1        | 8975.51 | 158 |
| S298 |       | 61  | 4 | OAR4_39813653.1    | OAR4_56340637.1 | 16527   | 308 |
| S298 |       | 27  | 4 | DU194821_342.1     | OAR4_61284730.1 | 14228.1 | 279 |
| S298 |       | 29  | 4 | DU194821_342.1     | OAR4_61284730.1 | 14228.1 | 279 |
| S298 |       | 606 | 4 | OAR4_37940876.1    | OAR4_55963926.1 | 18023   | 344 |
| S298 | CON   | 6   | 4 | DU194821_342.1     | s05903.1        | 1808.75 | 32  |
| S298 | UNION | 6   | 4 | OAR4_37940876.1    | OAR4_61284730.1 | 23343.9 | 451 |
| S299 |       | 829 | 4 | OAR4_3610903.1     | OAR4_5767890.1  | 2156.99 | 39  |
| S299 |       | 79  | 4 | OAR4_3610903.1     | s41814.1        | 1891.47 | 36  |
| S299 |       | 702 | 4 | OARUn.284_293028.1 | OAR4_24251309.1 | 24251.3 | 470 |
| S299 |       | 29  | 4 | OAR4_742452.1      | OAR4_5847332.1  | 5104.88 | 85  |
| S299 |       | 45  | 4 | OAR4_2368769.1     | s62909.1        | 2560.16 | 42  |
| S299 |       | 61  | 4 | OAR4_3630456.1     | s45567.1        | 2316.36 | 42  |
| S299 | CON   | 6   | 4 | OAR4_3630456.1     | s62909.1        | 1298.47 | 23  |
| S299 | UNION | 6   | 4 | OARUn.284_293028.1 | OAR4_24251309.1 | 24251.3 | 470 |

|      |       |     |   |                  |                    |         |     |
|------|-------|-----|---|------------------|--------------------|---------|-----|
| S300 |       | 61  | 3 | OAR3_216958700.1 | OAR3_218311285.1   | 1352.59 | 31  |
| S300 |       | 627 | 3 | OAR3_216714207.1 | s32572.1           | 1813.47 | 38  |
| S300 |       | 629 | 3 | OAR3_216714207.1 | s32572.1           | 1813.47 | 38  |
| S300 |       | 606 | 3 | s07450.1         | OAR3_218311285.1   | 2546.7  | 53  |
| S300 |       | 616 | 3 | OAR3_209072421.1 | OAR3_222052522.1   | 12980.1 | 230 |
| S300 |       | 79  | 3 | OAR3_217297404.1 | OAR3_218733455.1   | 1436.05 | 32  |
| S300 | CON   | 6   | 3 | OAR3_217297404.1 | OAR3_218311285.1   | 1013.88 | 23  |
| S300 | UNION | 6   | 3 | OAR3_209072421.1 | OAR3_222052522.1   | 12980.1 | 230 |
|      |       |     |   |                  |                    |         |     |
| S301 |       | 627 | 3 | OAR3_206227595.1 | OAR3_209042148.1   | 2814.55 | 62  |
| S301 |       | 629 | 3 | OAR3_206227595.1 | OAR3_209042148.1   | 2814.55 | 62  |
| S301 |       | 829 | 3 | OAR3_205737877.1 | OAR3_208666709.1   | 2928.83 | 65  |
| S301 |       | 152 | 3 | OAR3_205307357.1 | OAR3_207087501_X.1 | 1780.14 | 40  |
| S301 |       | 507 | 3 | OAR3_179244393.1 | OAR3_211362922_X.1 | 32118.5 | 604 |
| S301 |       | 157 | 3 | OAR3_206856083.1 | OAR3_209162669.1   | 2306.59 | 49  |
| S301 | CON   | 6   | 3 | OAR3_206856083.1 | OAR3_207087501_X.1 | 231.419 | 7   |
| S301 | UNION | 6   | 3 | OAR3_179244393.1 | OAR3_211362922_X.1 | 32118.5 | 604 |
|      |       |     |   |                  |                    |         |     |
| S302 |       | 616 | 3 | OAR3_185468392.1 | s17858.1           | 1913.95 | 35  |
| S302 |       | 507 | 3 | OAR3_179244393.1 | OAR3_211362922_X.1 | 32118.5 | 604 |
| S302 |       | 123 | 3 | s55427.1         | s32545.1           | 2793.06 | 53  |
| S302 |       | 45  | 3 | OAR3_183605277.1 | s52959.1           | 3069.59 | 58  |
| S302 |       | 702 | 3 | OAR3_178121896.1 | s16918.1           | 11927   | 230 |
| S302 |       | 844 | 3 | OAR3_182939964.1 | OAR3_186988175.1   | 4048.21 | 73  |
| S302 | CON   | 6   | 3 | s55427.1         | s52959.1           | 760.127 | 11  |
| S302 | UNION | 6   | 3 | OAR3_178121896.1 | OAR3_211362922_X.1 | 33241   | 624 |
|      |       |     |   |                  |                    |         |     |
| S307 |       | 507 | 3 | OAR3_179244393.1 | OAR3_211362922_X.1 | 32118.5 | 604 |
| S307 |       | 29  | 3 | OAR3_179244393.1 | s26854.1           | 4664.94 | 91  |
| S307 |       | 616 | 3 | OAR3_179244393.1 | OAR3_181236274.1   | 1991.88 | 45  |
| S307 |       | 606 | 3 | OAR3_177909045.1 | s26854.1           | 6000.29 | 115 |
| S307 |       | 702 | 3 | OAR3_178121896.1 | s16918.1           | 11927   | 230 |
| S307 |       | 61  | 3 | s38401.1         | OAR3_183605277.1   | 2795.96 | 51  |
| S307 | CON   | 6   | 3 | s38401.1         | OAR3_181236274.1   | 426.953 | 11  |
| S307 | UNION | 6   | 3 | OAR3_177909045.1 | OAR3_211362922_X.1 | 33453.9 | 628 |
|      |       |     |   |                  |                    |         |     |
| S310 |       | 627 | 3 | OAR3_155236610.1 | s75549.1           | 19415.4 | 375 |
| S310 |       | 629 | 3 | OAR3_155236610.1 | s75549.1           | 19415.4 | 375 |
| S310 |       | 126 | 3 | OAR3_152741614.1 | OAR3_163942175.1   | 11200.6 | 212 |
| S310 |       | 61  | 3 | s26286.1         | s51772.1           | 2640.78 | 48  |
| S310 |       | 29  | 3 | s27935.1         | DU358217_394.1     | 2232.57 | 35  |
| S310 |       | 152 | 3 | OAR3_158876220.1 | OAR3_162346644.1   | 3470.42 | 61  |
| S310 | CON   | 6   | 3 | s26286.1         | DU358217_394.1     | 1263.16 | 24  |
| S310 | UNION | 6   | 3 | OAR3_152741614.1 | s75549.1           | 21910.4 | 419 |
|      |       |     |   |                  |                    |         |     |
| S311 |       | 606 | 3 | OAR3_119895458.1 | OAR3_130397300.1   | 10501.8 | 199 |
| S311 |       | 45  | 3 | OAR3_119895458.1 | OAR3_121938058.1   | 2042.6  | 42  |
| S311 |       | 616 | 3 | OAR3_119168695.1 | OAR3_121189388.1   | 2020.69 | 44  |
| S311 |       | 140 | 3 | OAR3_118738718.1 | OAR3_121938058.1   | 3199.34 | 65  |
| S311 |       | 702 | 3 | OAR3_120965794.1 | OAR3_123473821.1   | 2508.03 | 48  |
| S311 |       | 629 | 3 | OAR3_112096089.1 | OAR3_121762751.1   | 9666.66 | 172 |
| S311 | CON   | 6   | 3 | OAR3_120965794.1 | OAR3_121189388.1   | 223.594 | 4   |
| S311 | UNION | 6   | 3 | OAR3_112096089.1 | OAR3_130397300.1   | 18301.2 | 332 |

|      |       |     |   |                  |                  |         |      |
|------|-------|-----|---|------------------|------------------|---------|------|
| S314 |       | 606 | 3 | OAR3_119895458.1 | OAR3_130397300.1 | 10501.8 | 199  |
| S314 |       | 45  | 3 | OAR3_119895458.1 | OAR3_121938058.1 | 2042.6  | 42   |
| S314 |       | 616 | 3 | OAR3_119168695.1 | OAR3_121189388.1 | 2020.69 | 44   |
| S314 |       | 140 | 3 | OAR3_118738718.1 | OAR3_121938058.1 | 3199.34 | 65   |
| S314 |       | 123 | 3 | OAR3_118383093.1 | OAR3_120348297.1 | 1965.2  | 39   |
| S314 |       | 629 | 3 | OAR3_112096089.1 | OAR3_121762751.1 | 9666.66 | 172  |
| S314 | CON   | 6   | 3 | OAR3_119895458.1 | OAR3_120348297.1 | 452.839 | 10   |
| S314 | UNION | 6   | 3 | OAR3_112096089.1 | OAR3_130397300.1 | 18301.2 | 332  |
| S315 |       | 152 | 3 | OAR3_78511530.1  | OAR3_80763380.1  | 2251.85 | 51   |
| S315 |       | 507 | 3 | OAR3_77718162.1  | OAR3_82856188.1  | 5138.03 | 112  |
| S315 |       | 606 | 3 | OAR3_77361732.1  | OAR3_78678231.1  | 1316.5  | 34   |
| S315 |       | 49  | 3 | s53138.1         | OAR3_78678231.1  | 1353.04 | 35   |
| S315 |       | 702 | 3 | OAR3_78338656.1  | s45788.1         | 2098.32 | 48   |
| S315 |       | 123 | 3 | OAR3_78338656.1  | s45788.1         | 2098.32 | 48   |
| S315 | CON   | 6   | 3 | OAR3_78511530.1  | OAR3_78678231.1  | 166.701 | 5    |
| S315 | UNION | 6   | 3 | s53138.1         | OAR3_82856188.1  | 5531    | 124  |
| S318 |       | 27  | 3 | OAR3_64474656.1  | OAR3_67137932.1  | 2663.28 | 53   |
| S318 |       | 40  | 3 | OAR3_64474656.1  | OAR3_66798124.1  | 2323.47 | 45   |
| S318 |       | 627 | 3 | OAR3_64474656.1  | OAR3_66317995.1  | 1843.34 | 37   |
| S318 |       | 45  | 3 | s45049.1         | OAR3_66317995.1  | 4167.71 | 82   |
| S318 |       | 123 | 3 | s24884.1         | OAR3_67751047.1  | 1949.75 | 42   |
| S318 |       | 61  | 3 | s40974.1         | OAR3_68372978.1  | 2366.7  | 50   |
| S318 | CON   | 6   | 3 | s40974.1         | OAR3_66317995.1  | 311.717 | 7    |
| S318 | UNION | 6   | 3 | s45049.1         | OAR3_68372978.1  | 6222.69 | 125  |
| S319 |       | 507 | 3 | OAR3_43871305.1  | OAR3_52722619.1  | 8851.31 | 160  |
| S319 |       | 49  | 3 | OAR3_43700480.1  | OAR3_50145205.1  | 6444.73 | 118  |
| S319 |       | 123 | 3 | s72091.1         | s14476.1         | 1854.07 | 41   |
| S319 |       | 140 | 3 | OAR3_42310885.1  | OAR3_43889039.1  | 1578.15 | 34   |
| S319 |       | 702 | 3 | DU259120_464.1   | OAR3_59494261.1  | 59494.3 | 1111 |
| S319 |       | 27  | 3 | s12024.1         | s69330.1         | 4167.98 | 82   |
| S319 | CON   | 6   | 3 | OAR3_43871305.1  | OAR3_43889039.1  | 17.734  | 2    |
| S319 | UNION | 6   | 3 | DU259120_464.1   | OAR3_59494261.1  | 59494.3 | 1111 |
| S320 |       | 140 | 3 | OAR3_42310885.1  | OAR3_43889039.1  | 1578.15 | 34   |
| S320 |       | 49  | 3 | OAR3_43700480.1  | OAR3_50145205.1  | 6444.73 | 118  |
| S320 |       | 123 | 3 | s72091.1         | s14476.1         | 1854.07 | 41   |
| S320 |       | 556 | 3 | OAR3_42529367.1  | OAR3_43817056.1  | 1287.69 | 30   |
| S320 |       | 702 | 3 | DU259120_464.1   | OAR3_59494261.1  | 59494.3 | 1111 |
| S320 |       | 27  | 3 | s12024.1         | s69330.1         | 4167.98 | 82   |
| S320 | CON   | 6   | 3 | OAR3_43700480.1  | OAR3_43817056.1  | 116.576 | 5    |
| S320 | UNION | 6   | 3 | DU259120_464.1   | OAR3_59494261.1  | 59494.3 | 1111 |
| S324 |       | 40  | 2 | s50777.1         | s71655.1         | 2404.82 | 56   |
| S324 |       | 152 | 2 | OAR2_245114849.1 | s06384.1         | 1732.11 | 37   |
| S324 |       | 29  | 2 | OAR2_238444943.1 | s43939.1         | 16224.6 | 314  |
| S324 |       | 629 | 2 | OAR2_242229131.1 | DU503161_123.1   | 7148.91 | 146  |
| S324 |       | 45  | 2 | OAR2_246045571.1 | OAR2_248329507.1 | 2283.94 | 47   |
| S324 |       | 90  | 2 | s50777.1         | s27851.1         | 1738.78 | 39   |
| S324 | CON   | 6   | 2 | s50777.1         | s06384.1         | 178.181 | 6    |
| S324 | UNION | 6   | 2 | OAR2_238444943.1 | s43939.1         | 16224.6 | 314  |
| S325 |       | 45  | 2 | OAR2_246045571.1 | OAR2_248329507.1 | 2283.94 | 47   |

|      |       |     |   |                    |                    |         |     |
|------|-------|-----|---|--------------------|--------------------|---------|-----|
| S325 |       | 507 | 2 | OAR2_244460688.1   | OAR2_246045571.1   | 1584.88 | 33  |
| S325 |       | 629 | 2 | OAR2_242229131.1   | DU503161_123.1     | 7148.91 | 146 |
| S325 |       | 627 | 2 | OAR2_238165550.1   | OAR2_246045571.1   | 7880.02 | 156 |
| S325 |       | 29  | 2 | OAR2_238444943.1   | s43939.1           | 16224.6 | 314 |
| S325 |       | 152 | 2 | OAR2_245114849.1   | s06384.1           | 1732.11 | 37  |
| S325 | CON   | 6   | 2 | OAR2_246045571.1   | OAR2_246045571.1   | 0       | 1   |
| S325 | UNION | 6   | 2 | OAR2_238165550.1   | s43939.1           | 16504   | 318 |
| S328 |       | 507 | 2 | OAR2_244460688.1   | OAR2_246045571.1   | 1584.88 | 33  |
| S328 |       | 629 | 2 | OAR2_242229131.1   | DU503161_123.1     | 7148.91 | 146 |
| S328 |       | 627 | 2 | OAR2_238165550.1   | OAR2_246045571.1   | 7880.02 | 156 |
| S328 |       | 29  | 2 | OAR2_238444943.1   | s43939.1           | 16224.6 | 314 |
| S328 |       | 844 | 2 | OAR2_243206127.1   | OAR2_245289710.1   | 2083.58 | 41  |
| S328 |       | 152 | 2 | OAR2_245114849.1   | s06384.1           | 1732.11 | 37  |
| S328 | CON   | 6   | 2 | OAR2_245114849.1   | OAR2_245289710.1   | 174.861 | 5   |
| S328 | UNION | 6   | 2 | OAR2_238165550.1   | s43939.1           | 16504   | 318 |
| S329 |       | 79  | 2 | OAR2_181847398.1   | s12968.1           | 13971.1 | 260 |
| S329 |       | 45  | 2 | OAR2_180239034.1   | s02554.1           | 3237.53 | 65  |
| S329 |       | 702 | 2 | OAR2_178886050.1   | s29646.1           | 4550.66 | 94  |
| S329 |       | 152 | 2 | s61174.1           | s26570.1           | 7267.15 | 138 |
| S329 |       | 90  | 2 | OAR2_181512709.1   | OAR2_190616592.1   | 9103.88 | 175 |
| S329 |       | 123 | 2 | OAR2_181847398.1   | OAR2_183941873.1   | 2094.47 | 47  |
| S329 | CON   | 6   | 2 | OAR2_181847398.1   | s29646.1           | 1589.32 | 35  |
| S329 | UNION | 6   | 2 | OAR2_178886050.1   | s12968.1           | 16932.4 | 319 |
| S331 |       | 126 | 2 | OAR2_144244441.1   | OAR2_149604966.1   | 5360.52 | 105 |
| S331 |       | 61  | 2 | OAR2_144244441.1   | OAR2_148238035.1   | 3993.59 | 78  |
| S331 |       | 507 | 2 | OAR2_144244441.1   | OAR2_146111824.1   | 1867.38 | 37  |
| S331 |       | 627 | 2 | OAR2_142684241.1   | OAR2_148048660.1   | 5364.42 | 105 |
| S331 |       | 123 | 2 | OAR2_140051989_X.1 | OAR2_144244441.1   | 4192.45 | 95  |
| S331 |       | 702 | 2 | s54108.1           | OAR2_162167662.1   | 23623.2 | 482 |
| S331 | CON   | 6   | 2 | OAR2_144244441.1   | OAR2_144244441.1   | 0       | 1   |
| S331 | UNION | 6   | 2 | s54108.1           | OAR2_162167662.1   | 23623.2 | 482 |
| S332 |       | 627 | 2 | OAR2_142684241.1   | OAR2_148048660.1   | 5364.42 | 105 |
| S332 |       | 829 | 2 | OAR2_141723000.1   | DU292901_688.1     | 2328.84 | 49  |
| S332 |       | 123 | 2 | OAR2_140051989_X.1 | OAR2_144244441.1   | 4192.45 | 95  |
| S332 |       | 40  | 2 | OAR2_139988851.1   | OAR2_143429707_X.1 | 3440.86 | 78  |
| S332 |       | 702 | 2 | s54108.1           | OAR2_162167662.1   | 23623.2 | 482 |
| S332 |       | 45  | 2 | OAR2_141764296.1   | OAR2_143949087.1   | 2184.79 | 45  |
| S332 | CON   | 6   | 2 | OAR2_142684241.1   | OAR2_143429707_X.1 | 745.467 | 13  |
| S332 | UNION | 6   | 2 | s54108.1           | OAR2_162167662.1   | 23623.2 | 482 |
| S333 |       | 507 | 1 | s22571.1           | s56772.1           | 15398.3 | 291 |
| S333 |       | 90  | 1 | OAR1_280918505.1   | s59682.1           | 4159.05 | 86  |
| S333 |       | 606 | 1 | s35781.1           | OAR1_287434870.1   | 2608.39 | 48  |
| S333 |       | 61  | 1 | s35781.1           | OAR1_287434870.1   | 2608.39 | 48  |
| S333 |       | 29  | 1 | OAR1_283569518.1   | s39199.1           | 5956.3  | 95  |
| S333 |       | 702 | 1 | OAR1_282017475.1   | s67262.1           | 9551.48 | 171 |
| S333 | CON   | 6   | 1 | s35781.1           | s59682.1           | 251.074 | 4   |
| S333 | UNION | 6   | 1 | OAR1_280918505.1   | s56772.1           | 15787.5 | 299 |
| S334 |       | 61  | 1 | OAR1_225094822.1   | OAR1_233116174.1   | 8021.35 | 151 |
| S334 |       | 829 | 1 | OAR1_219136030.1   | OAR1_236103073.1   | 16967   | 322 |

|      |       |     |   |                    |                          |         |     |
|------|-------|-----|---|--------------------|--------------------------|---------|-----|
| S334 |       | 629 | 1 | OAR1_214417389.1   | OAR1_233116174.1         | 18698.8 | 341 |
| S334 |       | 702 | 1 | OAR1_228131256.1   | OAR1_233756581.1         | 5625.32 | 96  |
| S334 |       | 40  | 1 | OAR1_230374318.1   | OAR1_234437646.1         | 4063.33 | 74  |
| S334 |       | 152 | 1 | OAR1_230994116.1   | OAR1_233249488.1         | 2255.37 | 43  |
| S334 | CON   | 6   | 1 | OAR1_230994116.1   | OAR1_233116174.1         | 2122.06 | 41  |
| S334 | UNION | 6   | 1 | OAR1_214417389.1   | OAR1_236103073.1         | 21685.7 | 402 |
| S335 |       | 61  | 1 | OAR1_225094822.1   | OAR1_233116174.1         | 8021.35 | 151 |
| S335 |       | 829 | 1 | OAR1_219136030.1   | OAR1_236103073.1         | 16967   | 322 |
| S335 |       | 629 | 1 | OAR1_214417389.1   | OAR1_233116174.1         | 18698.8 | 341 |
| S335 |       | 40  | 1 | OAR1_230374318.1   | OAR1_234437646.1         | 4063.33 | 74  |
| S335 |       | 90  | 1 | OAR1_222537672.1   | OAR1_230460155.1         | 7922.48 | 157 |
| S335 |       | 702 | 1 | OAR1_228131256.1   | OAR1_233756581.1         | 5625.32 | 96  |
| S335 | CON   | 6   | 1 | OAR1_230374318.1   | OAR1_230460155.1         | 85.837  | 3   |
| S335 | UNION | 6   | 1 | OAR1_214417389.1   | OAR1_236103073.1         | 21685.7 | 402 |
| S336 |       | 61  | 1 | OAR1_225094822.1   | OAR1_233116174.1         | 8021.35 | 151 |
| S336 |       | 123 | 1 | OAR1_223721671.1   | OAR1_229347642.1         | 5625.97 | 108 |
| S336 |       | 90  | 1 | OAR1_222537672.1   | OAR1_230460155.1         | 7922.48 | 157 |
| S336 |       | 829 | 1 | OAR1_219136030.1   | OAR1_236103073.1         | 16967   | 322 |
| S336 |       | 629 | 1 | OAR1_214417389.1   | OAR1_233116174.1         | 18698.8 | 341 |
| S336 |       | 702 | 1 | OAR1_228131256.1   | OAR1_233756581.1         | 5625.32 | 96  |
| S336 | CON   | 6   | 1 | OAR1_228131256.1   | OAR1_229347642.1         | 1216.39 | 18  |
| S336 | UNION | 6   | 1 | OAR1_214417389.1   | OAR1_236103073.1         | 21685.7 | 402 |
| S338 |       | 61  | 1 | OAR1_225094822.1   | OAR1_233116174.1         | 8021.35 | 151 |
| S338 |       | 123 | 1 | OAR1_223721671.1   | OAR1_229347642.1         | 5625.97 | 108 |
| S338 |       | 45  | 1 | OAR1_223622781.1   | OAR1_225595665.1         | 1972.88 | 39  |
| S338 |       | 90  | 1 | OAR1_222537672.1   | OAR1_230460155.1         | 7922.48 | 157 |
| S338 |       | 829 | 1 | OAR1_219136030.1   | OAR1_236103073.1         | 16967   | 322 |
| S338 |       | 629 | 1 | OAR1_214417389.1   | OAR1_233116174.1         | 18698.8 | 341 |
| S338 | CON   | 6   | 1 | OAR1_225094822.1   | OAR1_225595665.1         | 500.843 | 12  |
| S338 | UNION | 6   | 1 | OAR1_214417389.1   | OAR1_236103073.1         | 21685.7 | 402 |
| S339 |       | 123 | 1 | OAR1_223721671.1   | OAR1_229347642.1         | 5625.97 | 108 |
| S339 |       | 45  | 1 | OAR1_223622781.1   | OAR1_225595665.1         | 1972.88 | 39  |
| S339 |       | 90  | 1 | OAR1_222537672.1   | OAR1_230460155.1         | 7922.48 | 157 |
| S339 |       | 829 | 1 | OAR1_219136030.1   | OAR1_236103073.1         | 16967   | 322 |
| S339 |       | 629 | 1 | OAR1_214417389.1   | OAR1_233116174.1         | 18698.8 | 341 |
| S339 |       | 702 | 1 | OAR1_201628760.1   | OAR1_224818104.1         | 23189.3 | 424 |
| S339 | CON   | 6   | 1 | OAR1_223721671.1   | OAR1_224818104.1         | 1096.43 | 21  |
| S339 | UNION | 6   | 1 | OAR1_201628760.1   | OAR1_236103073.1         | 34474.3 | 639 |
| S342 |       | 507 | 1 | s71677.1           | OAR1_206274474.1         | 4131.31 | 65  |
| S342 |       | 629 | 1 | DU316524_436.1     | OAR1_207345817.1         | 5355.54 | 90  |
| S342 |       | 829 | 1 | s66109.1           | s65811.1                 | 2617.61 | 35  |
| S342 |       | 801 | 1 | OAR1_198827329.1   | s56333.1                 | 6897.16 | 121 |
| S342 |       | 157 | 1 | DU287626_225.1 250 | 506CS3900283200001_442.1 | 2218.24 | 32  |
| S342 |       | 702 | 1 | OAR1_201628760.1   | OAR1_224818104.1         | 23189.3 | 424 |
| S342 | CON   | 6   | 1 | s71677.1 250       | 506CS3900283200001_442.1 | 1146.48 | 11  |
| S342 | UNION | 6   | 1 | OAR1_198827329.1   | OAR1_224818104.1         | 25990.8 | 478 |
| S343 |       | 801 | 1 | OAR1_173556038.1   | s55456.1                 | 1880.2  | 38  |
| S343 |       | 627 | 1 | OAR1_173251355.1   | s30482.1                 | 2379.26 | 46  |
| S343 |       | 629 | 1 | OAR1_173251355.1   | s30482.1                 | 2379.26 | 46  |



|      |       |     |   |                  |                    |         |     |
|------|-------|-----|---|------------------|--------------------|---------|-----|
| S343 |       | 79  | 1 | OAR1_172310048.1 | OAR1_174084771.1   | 1774.72 | 35  |
| S343 |       | 123 | 1 | OAR1_172310048.1 | OAR1_174084771.1   | 1774.72 | 35  |
| S343 |       | 27  | 1 | OAR1_172859107.1 | OAR1_177098302.1   | 4239.19 | 71  |
| S343 | CON   | 6   | 1 | OAR1_173556038.1 | OAR1_174084771.1   | 528.733 | 12  |
| S343 | UNION | 6   | 1 | OAR1_172310048.1 | OAR1_177098302.1   | 4788.25 | 83  |
| S344 |       | 40  | 1 | OAR1_170034165.1 | OAR1_171775698.1   | 1741.53 | 34  |
| S344 |       | 606 | 1 | OAR1_169720464.1 | OAR1_171775698.1   | 2055.23 | 38  |
| S344 |       | 45  | 1 | OAR1_169643592.1 | OAR1_171775698.1   | 2132.11 | 40  |
| S344 |       | 27  | 1 | OAR1_169609478.1 | OAR1_171775698.1   | 2166.22 | 41  |
| S344 |       | 627 | 1 | OAR1_169609478.1 | OAR1_171275473.1   | 1665.99 | 32  |
| S344 |       | 629 | 1 | OAR1_169609478.1 | OAR1_171275473.1   | 1665.99 | 32  |
| S344 | CON   | 6   | 1 | OAR1_170034165.1 | OAR1_171275473.1   | 1241.31 | 25  |
| S344 | UNION | 6   | 1 | OAR1_169609478.1 | OAR1_171775698.1   | 2166.22 | 41  |
| S346 |       | 79  | 1 | OAR1_149565545.1 | OAR1_151312088.1   | 1746.54 | 42  |
| S346 |       | 61  | 1 | OAR1_148262943.1 | OAR1_151312088.1   | 3049.14 | 67  |
| S346 |       | 123 | 1 | s53597.1         | OAR1_153662211.1   | 35798.6 | 631 |
| S346 |       | 27  | 1 | OAR1_151206081.1 | DU499024_430.1     | 2767.31 | 53  |
| S346 |       | 40  | 1 | OAR1_150005378.1 | OAR1_151330117.1   | 1324.74 | 32  |
| S346 |       | 90  | 1 | OAR1_148901159.1 | OAR1_151247138.1   | 2345.98 | 54  |
| S346 | CON   | 6   | 1 | OAR1_151206081.1 | OAR1_151247138.1   | 41.057  | 2   |
| S346 | UNION | 6   | 1 | s53597.1         | DU499024_430.1     | 36109.8 | 636 |
| S350 |       | 61  | 1 | OAR1_117978374.1 | OAR1_122656397.1   | 4678.02 | 78  |
| S350 |       | 801 | 1 | OAR1_110989185.1 | s10939.1           | 7522.21 | 114 |
| S350 |       | 829 | 1 | OAR1_117951301.1 | OAR1_120197222.1   | 2245.92 | 34  |
| S350 |       | 702 | 1 | s14189.1         | s40751.1           | 42088.8 | 712 |
| S350 |       | 45  | 1 | s37607.1         | s04671.1           | 16346.9 | 247 |
| S350 |       | 123 | 1 | s53597.1         | OAR1_153662211.1   | 35798.6 | 631 |
| S350 | CON   | 6   | 1 | OAR1_117978374.1 | s10939.1           | 533.02  | 10  |
| S350 | UNION | 6   | 1 | s14189.1         | OAR1_153662211.1   | 45938.1 | 791 |
| S351 |       | 40  | 1 | s69088.1         | OAR1_114069491_X.1 | 2477.52 | 40  |
| S351 |       | 801 | 1 | OAR1_110989185.1 | s10939.1           | 7522.21 | 114 |
| S351 |       | 507 | 1 | OAR1_109879519.1 | OAR1_114069491_X.1 | 4189.97 | 75  |
| S351 |       | 79  | 1 | OAR1_108764473.1 | s01025.1           | 4913.19 | 93  |
| S351 |       | 27  | 1 | s00446.1         | s04333.1           | 4130.65 | 80  |
| S351 |       | 702 | 1 | s14189.1         | s40751.1           | 42088.8 | 712 |
| S351 | CON   | 6   | 1 | s69088.1         | s04333.1           | 1002.09 | 20  |
| S351 | UNION | 6   | 1 | s14189.1         | s40751.1           | 42088.8 | 712 |
| S359 |       | 507 | 1 | OAR1_77772595.1  | OAR1_80338579.1    | 2565.98 | 53  |
| S359 |       | 40  | 1 | OAR1_77541835.1  | OAR1_79381781.1    | 1839.95 | 37  |
| S359 |       | 49  | 1 | OAR1_77478775.1  | OAR1_79381781.1    | 1903.01 | 38  |
| S359 |       | 29  | 1 | s09749.1         | OAR1_77993538.1    | 1692.39 | 35  |
| S359 |       | 45  | 1 | OAR1_76111336.1  | OAR1_77993538.1    | 1882.2  | 39  |
| S359 |       | 61  | 1 | s58781.1         | s29884.1           | 9573.23 | 170 |
| S359 | CON   | 6   | 1 | OAR1_77772595.1  | s29884.1           | 91.737  | 3   |
| S359 | UNION | 6   | 1 | s58781.1         | OAR1_80338579.1    | 12047.5 | 220 |
| S360 |       | 507 | 1 | OAR1_67421568.1  | OAR1_71254279.1    | 3832.71 | 57  |
| S360 |       | 123 | 1 | OAR1_67236647.1  | OAR1_69224190.1    | 1987.54 | 39  |
| S360 |       | 606 | 1 | OAR1_66298910.1  | OAR1_68758775.1    | 2459.86 | 47  |
| S360 |       | 90  | 1 | OAR1_66156513.1  | OAR1_74623022.1    | 8466.51 | 147 |

|      |       |     |    |                    |                  |         |     |
|------|-------|-----|----|--------------------|------------------|---------|-----|
| S360 |       | 702 | 1  | OAR1_65265541_X.1  | OAR1_73281352.1  | 8015.81 | 136 |
| S360 |       | 61  | 1  | s58781.1           | s29884.1         | 9573.23 | 170 |
| S360 | CON   | 6   | 1  | s58781.1           | OAR1_68758775.1  | 467.676 | 8   |
| S360 | UNION | 6   | 1  | OAR1_65265541_X.1  | s29884.1         | 12598.8 | 227 |
| S361 |       | 507 | 1  | OAR1_67421568.1    | OAR1_71254279.1  | 3832.71 | 57  |
| S361 |       | 123 | 1  | OAR1_67236647.1    | OAR1_69224190.1  | 1987.54 | 39  |
| S361 |       | 606 | 1  | OAR1_66298910.1    | OAR1_68758775.1  | 2459.86 | 47  |
| S361 |       | 90  | 1  | OAR1_66156513.1    | OAR1_74623022.1  | 8466.51 | 147 |
| S361 |       | 702 | 1  | OAR1_65265541_X.1  | OAR1_73281352.1  | 8015.81 | 136 |
| S361 |       | 29  | 1  | OAR1_66062371.1    | OAR1_68115107.1  | 2052.74 | 43  |
| S361 | CON   | 6   | 1  | OAR1_67421568.1    | OAR1_68115107.1  | 693.539 | 17  |
| S361 | UNION | 6   | 1  | OAR1_65265541_X.1  | OAR1_74623022.1  | 9357.48 | 161 |
| S362 |       | 61  | 26 | s63463.1           | OAR26_46995252.1 | 7812.86 | 140 |
| S362 |       | 801 | 26 | OAR26_38693145_X.1 | s45791.1         | 2078.09 | 36  |
| S362 |       | 45  | 26 | s70488.1           | OAR26_42514266.1 | 6953.15 | 122 |
| S362 |       | 90  | 26 | s17399.1           | s68466.1         | 2193.9  | 38  |
| S362 |       | 627 | 26 | OAR26_38739733.1   | s24097.1         | 2610.51 | 48  |
| S362 | CON   | 5   | 26 | s63463.1           | s68466.1         | 941.629 | 17  |
| S362 | UNION | 5   | 26 | s70488.1           | OAR26_46995252.1 | 11434.1 | 195 |
| S363 |       | 627 | 26 | OAR26_38739733.1   | s24097.1         | 2610.51 | 48  |
| S363 |       | 801 | 26 | OAR26_38693145_X.1 | s45791.1         | 2078.09 | 36  |
| S363 |       | 90  | 26 | s17399.1           | s68466.1         | 2193.9  | 38  |
| S363 |       | 61  | 26 | OAR26_36101444.1   | OAR26_38739733.1 | 2638.29 | 38  |
| S363 |       | 45  | 26 | s70488.1           | OAR26_42514266.1 | 6953.15 | 122 |
| S363 | CON   | 5   | 26 | OAR26_38739733.1   | OAR26_38739733.1 | 0       | 1   |
| S363 | UNION | 5   | 26 | s70488.1           | OAR26_42514266.1 | 6953.15 | 122 |
| S364 |       | 45  | 26 | s70488.1           | OAR26_42514266.1 | 6953.15 | 122 |
| S364 |       | 49  | 26 | s55357.1           | OAR26_38251830.1 | 2778.42 | 39  |
| S364 |       | 27  | 26 | s70442.1           | OAR26_38635621.1 | 2879.24 | 43  |
| S364 |       | 629 | 26 | OAR26_35704585.1   | OAR26_38568519.1 | 2863.93 | 43  |
| S364 |       | 40  | 26 | s62504.1           | s75723.1         | 1638.78 | 30  |
| S364 | CON   | 5   | 26 | s70442.1           | s75723.1         | 128.391 | 4   |
| S364 | UNION | 5   | 26 | s62504.1           | OAR26_42514266.1 | 8268.27 | 145 |
| S365 |       | 79  | 25 | s25708.1           | s19885.1         | 1565.13 | 31  |
| S365 |       | 61  | 25 | OAR25_12492866.1   | OAR25_21044148.1 | 8551.28 | 175 |
| S365 |       | 507 | 25 | s10320.1           | s12031.1         | 20755.8 | 401 |
| S365 |       | 844 | 25 | OAR25_19516269.1   | OAR25_25861480.1 | 6345.21 | 122 |
| S365 |       | 126 | 25 | s72138.1           | s47975.1         | 1901.42 | 35  |
| S365 | CON   | 5   | 25 | s72138.1           | s19885.1         | 369.773 | 9   |
| S365 | UNION | 5   | 25 | s10320.1           | s12031.1         | 20755.8 | 401 |
| S366 |       | 61  | 25 | OAR25_12492866.1   | OAR25_21044148.1 | 8551.28 | 175 |
| S366 |       | 79  | 25 | OAR25_12366791.1   | OAR25_14279951.1 | 1913.16 | 35  |
| S366 |       | 152 | 25 | OAR25_10480244.1   | OAR25_14279951.1 | 3799.71 | 71  |
| S366 |       | 90  | 25 | OAR25_10160789.1   | s21640.1         | 3276.28 | 60  |
| S366 |       | 507 | 25 | s10320.1           | s12031.1         | 20755.8 | 401 |
| S366 | CON   | 5   | 25 | OAR25_12492866.1   | s21640.1         | 944.203 | 16  |
| S366 | UNION | 5   | 25 | s10320.1           | s12031.1         | 20755.8 | 401 |
| S367 |       | 152 | 24 | OAR24_11445879.1   | OAR24_13675640.1 | 2229.76 | 30  |

|      |       |     |    |                  |                    |         |     |
|------|-------|-----|----|------------------|--------------------|---------|-----|
| S367 |       | 123 | 24 | OAR24_10812839.1 | s50198.1           | 5516.68 | 74  |
| S367 |       | 629 | 24 | s49862.1         | OAR24_13169307.1   | 3385.14 | 46  |
| S367 |       | 507 | 24 | OAR24_8989305.1  | s61066.1           | 4513.75 | 65  |
| S367 |       | 702 | 24 | s35472.1         | OAR24_22201078.1   | 16855.5 | 259 |
| S367 | CON   | 5   | 24 | OAR24_11445879.1 | OAR24_13169307.1   | 1723.43 | 23  |
| S367 | UNION | 5   | 24 | s35472.1         | OAR24_22201078.1   | 16855.5 | 259 |
|      |       |     |    |                  |                    |         |     |
| S368 |       | 27  | 23 | s58136.1         | OAR23_60124720.1   | 9675.72 | 139 |
| S368 |       | 29  | 23 | s58136.1         | OAR23_60124720.1   | 9675.72 | 139 |
| S368 |       | 507 | 23 | s47120.1         | OAR23_56845264.1   | 5236.32 | 78  |
| S368 |       | 844 | 23 | OAR23_52077991.1 | s45849.1           | 3992.95 | 58  |
| S368 |       | 606 | 23 | OAR23_52091614.1 | OAR23_54737060.1   | 2645.45 | 44  |
| S368 | CON   | 5   | 23 | OAR23_52091614.1 | OAR23_54737060.1   | 2645.45 | 44  |
| S368 | UNION | 5   | 23 | s58136.1         | OAR23_60124720.1   | 9675.72 | 139 |
|      |       |     |    |                  |                    |         |     |
| S375 |       | 152 | 23 | OAR23_46850769.1 | OAR23_48878158.1   | 2027.39 | 34  |
| S375 |       | 45  | 23 | s37648.1         | OAR23_48086126.1   | 4188.47 | 55  |
| S375 |       | 629 | 23 | s37648.1         | OAR23_48086126.1   | 4188.47 | 55  |
| S375 |       | 606 | 23 | OAR23_47138977.1 | s72429.1           | 3767.44 | 67  |
| S375 |       | 844 | 23 | s65540.1         | OAR23_47913202.1   | 2599.54 | 32  |
| S375 | CON   | 5   | 23 | OAR23_47138977.1 | OAR23_47913202.1   | 774.225 | 13  |
| S375 | UNION | 5   | 23 | s37648.1         | s72429.1           | 7008.76 | 105 |
|      |       |     |    |                  |                    |         |     |
| S378 |       | 627 | 23 | s19815.1         | OAR23_41224486.1   | 2235.44 | 36  |
| S378 |       | 629 | 23 | s19815.1         | OAR23_41224486.1   | 2235.44 | 36  |
| S378 |       | 45  | 23 | OAR23_32717464.1 | s03900.1           | 8953.01 | 139 |
| S378 |       | 702 | 23 | OAR23_32970524.1 | s47536.1           | 10557   | 158 |
| S378 |       | 123 | 23 | s68212.1         | OAR23_40483343.1   | 2784.39 | 44  |
| S378 | CON   | 5   | 23 | s19815.1         | OAR23_40483343.1   | 1494.3  | 26  |
| S378 | UNION | 5   | 23 | OAR23_32717464.1 | s47536.1           | 10810.1 | 163 |
|      |       |     |    |                  |                    |         |     |
| S381 |       | 140 | 23 | OAR23_30906493.1 | OAR23_32970524.1   | 2064.03 | 32  |
| S381 |       | 27  | 23 | OAR23_28704954.1 | OAR23_31443579.1   | 2738.62 | 41  |
| S381 |       | 29  | 23 | s58159.1         | OAR23_31443579.1   | 5396.2  | 77  |
| S381 |       | 79  | 23 | OAR23_25154247.1 | OAR23_31443579.1   | 6289.33 | 95  |
| S381 |       | 616 | 23 | OAR23_30686953.1 | OAR23_32932392_X.1 | 2245.44 | 33  |
| S381 | CON   | 5   | 23 | OAR23_30906493.1 | OAR23_31443579.1   | 537.086 | 4   |
| S381 | UNION | 5   | 23 | OAR23_25154247.1 | OAR23_32970524.1   | 7816.28 | 123 |
|      |       |     |    |                  |                    |         |     |
| S382 |       | 79  | 23 | s35508.1         | OAR23_11959774.1   | 4010.75 | 66  |
| S382 |       | 140 | 23 | s62451.1         | s50084.1           | 2433.33 | 42  |
| S382 |       | 27  | 23 | s01824.1         | OAR23_8935783.1    | 2220.2  | 35  |
| S382 |       | 702 | 23 | s07716.1         | OAR23_12771349.1   | 4783.72 | 80  |
| S382 |       | 606 | 23 | s33116.1         | OAR23_10243385_X.1 | 2196.39 | 38  |
| S382 | CON   | 5   | 23 | s33116.1         | OAR23_8935783.1    | 888.784 | 12  |
| S382 | UNION | 5   | 23 | s01824.1         | OAR23_12771349.1   | 6055.77 | 102 |
|      |       |     |    |                  |                    |         |     |
| S383 |       | 152 | 21 | OAR21_52385914.1 | s53160.1           | 3090.45 | 40  |
| S383 |       | 844 | 21 | s75988.1         | OAR21_54464294.1   | 7093.13 | 95  |
| S383 |       | 123 | 21 | s30026.1         | s11366.1           | 5205.16 | 71  |
| S383 |       | 627 | 21 | s03044.1         | OAR21_54143578.1   | 3949.9  | 61  |
| S383 |       | 90  | 21 | s23363.1         | s53160.1           | 4496.72 | 61  |
| S383 | CON   | 5   | 21 | OAR21_52385914.1 | s11366.1           | 44.973  | 2   |
| S383 | UNION | 5   | 21 | s30026.1         | s53160.1           | 8250.64 | 109 |

|      |       |     |    |                  |                  |         |     |
|------|-------|-----|----|------------------|------------------|---------|-----|
| S390 |       | 507 | 21 | s26077.1         | s59900.1         | 2557.94 | 53  |
| S390 |       | 140 | 21 | s75799.1         | OAR21_38087037.1 | 2579.68 | 44  |
| S390 |       | 27  | 21 | s25809.1         | s13923.1         | 11828.3 | 168 |
| S390 |       | 90  | 21 | s75804.1         | s55303.1         | 6697.66 | 125 |
| S390 |       | 829 | 21 | s75799.1         | s08492.1         | 2047.17 | 32  |
| S390 | CON   | 5   | 21 | s26077.1         | s08492.1         | 805.544 | 19  |
| S390 | UNION | 5   | 21 | s25809.1         | s13923.1         | 11828.3 | 168 |
| S391 |       | 140 | 20 | s16031.1         | s12267.1         | 1880.87 | 40  |
| S391 |       | 27  | 20 | s58254.1         | s12267.1         | 2049.4  | 44  |
| S391 |       | 61  | 20 | s03715.1         | s68014.1         | 1734.93 | 32  |
| S391 |       | 29  | 20 | s38719.1         | OAR20_17775022.1 | 4200.7  | 84  |
| S391 |       | 123 | 20 | s03715.1         | OAR20_15759478.1 | 1449.45 | 30  |
| S391 | CON   | 5   | 20 | s16031.1         | OAR20_15759478.1 | 602.633 | 14  |
| S391 | UNION | 5   | 20 | s38719.1         | OAR20_17775022.1 | 4200.7  | 84  |
| S394 |       | 123 | 19 | s06628.1         | s48005.1         | 14962.5 | 245 |
| S394 |       | 61  | 19 | s68645.1         | s10765.1         | 3926.28 | 59  |
| S394 |       | 616 | 19 | OAR19_49208953.1 | s75263.1         | 1971.38 | 34  |
| S394 |       | 702 | 19 | OAR19_50399194.1 | s46131.1         | 2585.32 | 37  |
| S394 |       | 140 | 19 | s45366.1         | s34745.1         | 3419.3  | 49  |
| S394 | CON   | 5   | 19 | s45366.1         | s75263.1         | 553.421 | 10  |
| S394 | UNION | 5   | 19 | s06628.1         | s48005.1         | 14962.5 | 245 |
| S398 |       | 844 | 18 | OAR18_66384520.1 | s52137.1         | 1484.08 | 32  |
| S398 |       | 29  | 18 | s07565.1         | s67955.1         | 1775.03 | 40  |
| S398 |       | 79  | 18 | OAR18_65638912.1 | s07559.1         | 1232.2  | 30  |
| S398 |       | 507 | 18 | OAR18_65660908.1 | OAR18_68832375.1 | 3171.47 | 67  |
| S398 |       | 627 | 18 | s28124.1         | s67734.1         | 2172.87 | 45  |
| S398 | CON   | 5   | 18 | s28124.1         | s07559.1         | 305.595 | 9   |
| S398 | UNION | 5   | 18 | OAR18_65638912.1 | OAR18_68832375.1 | 3193.46 | 68  |
| S399 |       | 27  | 17 | s67104.1         | OAR17_67852025.1 | 2502.39 | 44  |
| S399 |       | 606 | 17 | s72201.1         | OAR17_70179693.1 | 5790.57 | 96  |
| S399 |       | 627 | 17 | s46474.1         | OAR17_65490341.1 | 8079.56 | 133 |
| S399 |       | 507 | 17 | s47176.1         | s49020.1         | 26754.9 | 433 |
| S399 |       | 702 | 17 | OAR17_36966397.1 | OAR17_74039265.1 | 37072.9 | 600 |
| S399 | CON   | 5   | 17 | s67104.1         | OAR17_65490341.1 | 140.707 | 3   |
| S399 | UNION | 5   | 17 | OAR17_36966397.1 | OAR17_74039265.1 | 37072.9 | 600 |
| S400 |       | 140 | 17 | OAR17_46861268.1 | s22393.1         | 3230.08 | 51  |
| S400 |       | 702 | 17 | OAR17_36966397.1 | OAR17_74039265.1 | 37072.9 | 600 |
| S400 |       | 157 | 17 | OAR17_43682916.1 | s10999.1         | 5855.49 | 91  |
| S400 |       | 79  | 17 | OAR17_44276820.1 | OAR17_50838067.1 | 6561.25 | 100 |
| S400 |       | 507 | 17 | s47176.1         | s49020.1         | 26754.9 | 433 |
| S400 | CON   | 5   | 17 | OAR17_46861268.1 | s10999.1         | 2677.14 | 44  |
| S400 | UNION | 5   | 17 | OAR17_36966397.1 | OAR17_74039265.1 | 37072.9 | 600 |
| S403 |       | 702 | 17 | OAR17_36966397.1 | OAR17_74039265.1 | 37072.9 | 600 |
| S403 |       | 140 | 17 | s32577.1         | s24812.1         | 4527.89 | 80  |
| S403 |       | 157 | 17 | OAR17_43682916.1 | s10999.1         | 5855.49 | 91  |
| S403 |       | 79  | 17 | OAR17_44276820.1 | OAR17_50838067.1 | 6561.25 | 100 |
| S403 |       | 507 | 17 | s47176.1         | s49020.1         | 26754.9 | 433 |
| S403 | CON   | 5   | 17 | s47176.1         | s24812.1         | 1835.4  | 23  |
| S403 | UNION | 5   | 17 | OAR17_36966397.1 | OAR17_74039265.1 | 37072.9 | 600 |

|      |       |     |    |                  |                    |         |     |
|------|-------|-----|----|------------------|--------------------|---------|-----|
| S404 |       | 79  | 17 | OAR17_23630662.1 | OAR17_25712322.1   | 2081.66 | 41  |
| S404 |       | 702 | 17 | OAR17_18822501.1 | OAR17_23630662.1   | 4808.16 | 81  |
| S404 |       | 627 | 17 | OAR17_13607110.1 | OAR17_23905156.1   | 10298   | 171 |
| S404 |       | 49  | 17 | OAR17_15114925.1 | OAR17_33024300.1   | 17909.4 | 313 |
| S404 |       | 606 | 17 | OAR17_17231699.1 | OAR17_23630662.1   | 6398.96 | 108 |
| S404 | CON   | 5   | 17 | OAR17_23630662.1 | OAR17_23630662.1   | 0       | 1   |
| S404 | UNION | 5   | 17 | OAR17_13607110.1 | OAR17_33024300.1   | 19417.2 | 336 |
| S405 |       | 61  | 17 | OAR17_15290555.1 | s34648.1           | 5841.11 | 97  |
| S405 |       | 627 | 17 | OAR17_13607110.1 | OAR17_23905156.1   | 10298   | 171 |
| S405 |       | 49  | 17 | OAR17_15114925.1 | OAR17_33024300.1   | 17909.4 | 313 |
| S405 |       | 606 | 17 | OAR17_17231699.1 | OAR17_23630662.1   | 6398.96 | 108 |
| S405 |       | 702 | 17 | OAR17_18822501.1 | OAR17_23630662.1   | 4808.16 | 81  |
| S405 | CON   | 5   | 17 | OAR17_18822501.1 | s34648.1           | 2309.16 | 37  |
| S405 | UNION | 5   | 17 | OAR17_13607110.1 | OAR17_33024300.1   | 19417.2 | 336 |
| S406 |       | 606 | 16 | s60183.1         | OAR16_49094655.1   | 2068.68 | 35  |
| S406 |       | 629 | 16 | s60183.1         | OAR16_49094655.1   | 2068.68 | 35  |
| S406 |       | 61  | 16 | OAR16_32465649.1 | OAR16_50643262_X.1 | 18177.6 | 326 |
| S406 |       | 616 | 16 | OAR16_40749182.1 | OAR16_55771610.1   | 15022.4 | 264 |
| S406 |       | 627 | 16 | OAR16_48105833.1 | OAR16_51462528.1   | 3356.7  | 61  |
| S406 | CON   | 5   | 16 | OAR16_48105833.1 | OAR16_49094655.1   | 988.822 | 21  |
| S406 | UNION | 5   | 16 | OAR16_32465649.1 | OAR16_55771610.1   | 23306   | 414 |
| S407 |       | 61  | 16 | OAR16_23680997.1 | OAR16_25765286.1   | 2084.29 | 37  |
| S407 |       | 629 | 16 | OAR16_23634510.1 | OAR16_26684182.1   | 3049.67 | 52  |
| S407 |       | 123 | 16 | s42829.1         | s00347.1           | 3521.21 | 61  |
| S407 |       | 507 | 16 | OAR16_22384075.1 | OAR16_23939306.1   | 1555.23 | 31  |
| S407 |       | 606 | 16 | s61872.1         | OAR16_32278875.1   | 10181.3 | 193 |
| S407 | CON   | 5   | 16 | OAR16_23680997.1 | OAR16_23939306.1   | 258.309 | 3   |
| S407 | UNION | 5   | 16 | s61872.1         | OAR16_32278875.1   | 10181.3 | 193 |
| S413 |       | 507 | 16 | OAR16_18182900.1 | s47010.1           | 1410.34 | 34  |
| S413 |       | 140 | 16 | OAR16_18125193.1 | s55433.1           | 1342.03 | 32  |
| S413 |       | 79  | 16 | OAR16_16552788.1 | OAR16_19068087.1   | 2515.3  | 52  |
| S413 |       | 40  | 16 | s38913.1         | OAR16_18865349.1   | 5499.5  | 103 |
| S413 |       | 702 | 16 | OAR16_11050320.1 | OAR16_20062365.1   | 9012.05 | 173 |
| S413 | CON   | 5   | 16 | OAR16_18182900.1 | OAR16_18865349.1   | 682.449 | 17  |
| S413 | UNION | 5   | 16 | OAR16_11050320.1 | OAR16_20062365.1   | 9012.05 | 173 |
| S420 |       | 627 | 15 | OAR15_41465316.1 | OAR15_53192586.1   | 11727.3 | 150 |
| S420 |       | 629 | 15 | s05399.1         | s61861.1           | 1488.93 | 30  |
| S420 |       | 126 | 15 | s60771.1         | s31640.1           | 1782.1  | 38  |
| S420 |       | 40  | 15 | OAR15_39858472.1 | s31640.1           | 1857.95 | 39  |
| S420 |       | 90  | 15 | OAR15_41465316.1 | OAR15_46781842.1   | 5316.53 | 97  |
| S420 | CON   | 5   | 15 | OAR15_41465316.1 | s31640.1           | 251.104 | 4   |
| S420 | UNION | 5   | 15 | OAR15_39858472.1 | OAR15_53192586.1   | 13334.1 | 185 |
| S425 |       | 702 | 13 | s43103.1         | s69997.1           | 32663.3 | 559 |
| S425 |       | 844 | 13 | s17883.1         | OAR13_68528151.1   | 4897.41 | 78  |
| S425 |       | 123 | 13 | s28942.1         | s21696.1           | 2426.28 | 36  |
| S425 |       | 616 | 13 | s35279.1         | OAR13_69559303_X.1 | 2999.91 | 45  |
| S425 |       | 49  | 13 | OAR13_66795163.1 | s49551.1           | 2397.51 | 37  |
| S425 | CON   | 5   | 13 | OAR13_66795163.1 | OAR13_68528151.1   | 1732.99 | 25  |

|      |       |     |    |                  |                    |         |      |
|------|-------|-----|----|------------------|--------------------|---------|------|
| S425 | UNION | 5   | 13 | s43103.1         | s69997.1           | 32663.3 | 559  |
| S426 |       | 616 | 13 | s35279.1         | OAR13_69559303_X.1 | 2999.91 | 45   |
| S426 |       | 90  | 13 | s00952.1         | s35279.1           | 2317.41 | 44   |
| S426 |       | 702 | 13 | s43103.1         | s69997.1           | 32663.3 | 559  |
| S426 |       | 844 | 13 | s17883.1         | OAR13_68528151.1   | 4897.41 | 78   |
| S426 |       | 123 | 13 | s28942.1         | s21696.1           | 2426.28 | 36   |
| S426 | CON   | 5   | 13 | s35279.1         | s35279.1           | 0       | 1    |
| S426 | UNION | 5   | 13 | s43103.1         | s69997.1           | 32663.3 | 559  |
| S430 |       | 801 | 13 | s62501.1         | s18127.1           | 1817.63 | 37   |
| S430 |       | 844 | 13 | OAR13_47720904.1 | s20479.1           | 6338.95 | 104  |
| S430 |       | 702 | 13 | s43103.1         | s69997.1           | 32663.3 | 559  |
| S430 |       | 123 | 13 | s61846.1         | OAR13_50758390.1   | 3333.51 | 67   |
| S430 |       | 556 | 13 | s36887.1         | OAR13_53493947.1   | 4913.95 | 79   |
| S430 | CON   | 5   | 13 | s36887.1         | s18127.1           | 1090.22 | 21   |
| S430 | UNION | 5   | 13 | s43103.1         | s69997.1           | 32663.3 | 559  |
| S435 |       | 45  | 13 | OAR13_39447377.1 | s32471.1           | 2176.24 | 31   |
| S435 |       | 49  | 13 | OAR13_39447377.1 | s32471.1           | 2176.24 | 31   |
| S435 |       | 556 | 13 | s18674.1         | OAR13_44631782.1   | 5987.19 | 98   |
| S435 |       | 29  | 13 | OAR13_39146165.1 | OAR13_41484865.1   | 2338.7  | 37   |
| S435 |       | 629 | 13 | OAR13_34785098.1 | s67974.1           | 5171.07 | 99   |
| S435 | CON   | 5   | 13 | OAR13_39447377.1 | s67974.1           | 508.789 | 8    |
| S435 | UNION | 5   | 13 | OAR13_34785098.1 | OAR13_44631782.1   | 9846.68 | 171  |
| S439 |       | 606 | 13 | OAR13_35686621.1 | s56749.1           | 1739.76 | 38   |
| S439 |       | 90  | 13 | OAR13_35648372.1 | s26568.1           | 2163.61 | 45   |
| S439 |       | 629 | 13 | OAR13_34785098.1 | s67974.1           | 5171.07 | 99   |
| S439 |       | 829 | 13 | s29601.1         | OAR13_37876562.1   | 14843.5 | 275  |
| S439 |       | 27  | 13 | OAR13_35076469.1 | OAR13_37625153_X.1 | 2548.68 | 49   |
| S439 | CON   | 5   | 13 | OAR13_35686621.1 | s56749.1           | 1739.76 | 38   |
| S439 | UNION | 5   | 13 | s29601.1         | s67974.1           | 16923.1 | 318  |
| S440 |       | 27  | 13 | OAR13_35076469.1 | OAR13_37625153_X.1 | 2548.68 | 49   |
| S440 |       | 629 | 13 | OAR13_34785098.1 | s67974.1           | 5171.07 | 99   |
| S440 |       | 90  | 13 | OAR13_31557833.1 | OAR13_35413855.1   | 3856.02 | 66   |
| S440 |       | 29  | 13 | s62936.1         | OAR13_35198687.1   | 9473.28 | 175  |
| S440 |       | 829 | 13 | s29601.1         | OAR13_37876562.1   | 14843.5 | 275  |
| S440 | CON   | 5   | 13 | OAR13_35076469.1 | OAR13_35198687.1   | 122.218 | 3    |
| S440 | UNION | 5   | 13 | s29601.1         | s67974.1           | 16923.1 | 318  |
| S441 |       | 627 | 12 | s63637.1         | OAR12_51498192.1   | 2978.12 | 59   |
| S441 |       | 629 | 12 | s63637.1         | OAR12_51498192.1   | 2978.12 | 59   |
| S441 |       | 123 | 12 | OAR12_30882746.1 | OAR12_62371899.1   | 31489.2 | 574  |
| S441 |       | 702 | 12 | s22960.1         | s60710.1           | 58755.9 | 1088 |
| S441 |       | 606 | 12 | OAR12_43758965.1 | OAR12_49228109.1   | 5469.14 | 102  |
| S441 | CON   | 5   | 12 | s63637.1         | OAR12_49228109.1   | 708.042 | 15   |
| S441 | UNION | 5   | 12 | s22960.1         | s60710.1           | 58755.9 | 1088 |
| S442 |       | 629 | 12 | OAR12_32481363.1 | OAR12_34756947.1   | 2275.58 | 51   |
| S442 |       | 844 | 12 | OAR12_31951136.1 | OAR12_34168645.1   | 2217.51 | 52   |
| S442 |       | 702 | 12 | s22960.1         | s60710.1           | 58755.9 | 1088 |
| S442 |       | 27  | 12 | OAR12_28316888.1 | s57344.1           | 11454   | 242  |
| S442 |       | 123 | 12 | OAR12_30882746.1 | OAR12_62371899.1   | 31489.2 | 574  |

|      |       |     |    |                  |                  |         |      |
|------|-------|-----|----|------------------|------------------|---------|------|
| S442 | CON   | 5   | 12 | OAR12_32481363.1 | OAR12_34168645.1 | 1687.28 | 40   |
| S442 | UNION | 5   | 12 | s22960.1         | s60710.1         | 58755.9 | 1088 |
| S443 |       | 123 | 12 | OAR12_30882746.1 | OAR12_62371899.1 | 31489.2 | 574  |
| S443 |       | 61  | 12 | s57656.1         | s23923.1         | 1878.72 | 36   |
| S443 |       | 507 | 12 | s13792.1         | s57817.1         | 31188.2 | 514  |
| S443 |       | 702 | 12 | s22960.1         | s60710.1         | 58755.9 | 1088 |
| S443 |       | 27  | 12 | OAR12_28316888.1 | s57344.1         | 11454   | 242  |
| S443 | CON   | 5   | 12 | OAR12_30882746.1 | s23923.1         | 248.28  | 3    |
| S443 | UNION | 5   | 12 | s13792.1         | s60710.1         | 71900.8 | 1272 |
| S444 |       | 61  | 12 | s57656.1         | s23923.1         | 1878.72 | 36   |
| S444 |       | 507 | 12 | s13792.1         | s57817.1         | 31188.2 | 514  |
| S444 |       | 152 | 12 | OAR12_29307422.1 | OAR12_30823763.1 | 1516.34 | 30   |
| S444 |       | 702 | 12 | s22960.1         | s60710.1         | 58755.9 | 1088 |
| S444 |       | 27  | 12 | OAR12_28316888.1 | s57344.1         | 11454   | 242  |
| S444 | CON   | 5   | 12 | OAR12_29307422.1 | OAR12_30823763.1 | 1516.34 | 30   |
| S444 | UNION | 5   | 12 | s13792.1         | s60710.1         | 71900.8 | 1272 |
| S445 |       | 629 | 12 | OAR12_21022562.1 | OAR12_22840561.1 | 1818    | 37   |
| S445 |       | 140 | 12 | OAR12_20168901.1 | OAR12_22539169.1 | 2370.27 | 50   |
| S445 |       | 507 | 12 | s13792.1         | s57817.1         | 31188.2 | 514  |
| S445 |       | 702 | 12 | s22960.1         | s60710.1         | 58755.9 | 1088 |
| S445 |       | 606 | 12 | OAR12_21699429.1 | s14801.1         | 3790.5  | 59   |
| S445 | CON   | 5   | 12 | OAR12_21699429.1 | OAR12_22539169.1 | 839.74  | 20   |
| S445 | UNION | 5   | 12 | s13792.1         | s60710.1         | 71900.8 | 1272 |
| S460 |       | 627 | 11 | OAR11_55335521.1 | s36067.1         | 1982.73 | 35   |
| S460 |       | 629 | 11 | s13742.1         | OAR11_61687914.1 | 12951   | 212  |
| S460 |       | 152 | 11 | OAR11_57189920.1 | OAR11_61713996.1 | 4524.08 | 72   |
| S460 |       | 702 | 11 | OAR11_57135966.1 | OAR11_63846580.1 | 6710.61 | 109  |
| S460 |       | 61  | 11 | OAR11_55421823.1 | s36067.1         | 1896.43 | 33   |
| S460 | CON   | 5   | 11 | OAR11_57189920.1 | s36067.1         | 128.336 | 3    |
| S460 | UNION | 5   | 11 | s13742.1         | OAR11_63846580.1 | 15109.6 | 249  |
| S469 |       | 152 | 11 | s26188.1         | s54753.1         | 1956.04 | 35   |
| S469 |       | 90  | 11 | s07556.1         | OAR11_55421823.1 | 8158.13 | 135  |
| S469 |       | 627 | 11 | OAR11_55335521.1 | s36067.1         | 1982.73 | 35   |
| S469 |       | 629 | 11 | s13742.1         | OAR11_61687914.1 | 12951   | 212  |
| S469 |       | 61  | 11 | OAR11_55421823.1 | s36067.1         | 1896.43 | 33   |
| S469 | CON   | 5   | 11 | OAR11_55421823.1 | OAR11_55421823.1 | 0       | 1    |
| S469 | UNION | 5   | 11 | s07556.1         | OAR11_61687914.1 | 14424.2 | 235  |
| S470 |       | 140 | 11 | s32976.1         | OAR11_21925396.1 | 3582.11 | 65   |
| S470 |       | 79  | 11 | s32976.1         | s33117.1         | 1526.31 | 32   |
| S470 |       | 627 | 11 | OAR11_17704915.1 | s29885.1         | 1485.24 | 31   |
| S470 |       | 702 | 11 | OAR11_17172323.1 | OAR11_33359712.1 | 16187.4 | 260  |
| S470 |       | 829 | 11 | s00452.1         | s27347.1         | 1796.09 | 37   |
| S470 | CON   | 5   | 11 | s00452.1         | s29885.1         | 787.547 | 20   |
| S470 | UNION | 5   | 11 | OAR11_17172323.1 | OAR11_33359712.1 | 16187.4 | 260  |
| S471 |       | 61  | 10 | OAR10_89779166.1 | s26573.1         | 2219.27 | 47   |
| S471 |       | 629 | 10 | OAR10_89733307.1 | s37245.1         | 2199.09 | 46   |
| S471 |       | 556 | 10 | s12759.1         | s10349.1         | 2436.29 | 52   |
| S471 |       | 45  | 10 | OAR10_88694929.1 | s26573.1         | 3303.51 | 74   |

|      |       |     |    |                   |                  |         |      |
|------|-------|-----|----|-------------------|------------------|---------|------|
| S471 |       | 829 | 10 | OAR10_89779166.1  | s49917.1         | 1486.99 | 30   |
| S471 | CON   | 5   | 10 | OAR10_89779166.1  | s49917.1         | 1486.99 | 30   |
| S471 | UNION | 5   | 10 | OAR10_88694929.1  | s10349.1         | 3374.14 | 75   |
| S474 |       | 40  | 10 | OAR10_62361045.1  | OAR10_66989523.1 | 4628.48 | 66   |
| S474 |       | 27  | 10 | OAR10_58094557.1  | OAR10_62988399.1 | 4893.84 | 90   |
| S474 |       | 157 | 10 | OAR10_57171204.1  | OAR10_62988399.1 | 5817.19 | 110  |
| S474 |       | 152 | 10 | OAR10_56312119.1  | OAR10_72914358.1 | 16602.2 | 277  |
| S474 |       | 90  | 10 | s25185.1          | OAR10_68005037.1 | 11797.8 | 188  |
| S474 | CON   | 5   | 10 | OAR10_62361045.1  | OAR10_62988399.1 | 627.354 | 19   |
| S474 | UNION | 5   | 10 | s25185.1          | OAR10_72914358.1 | 16707.1 | 280  |
| S475 |       | 157 | 10 | OAR10_57171204.1  | OAR10_62988399.1 | 5817.19 | 110  |
| S475 |       | 152 | 10 | OAR10_56312119.1  | OAR10_72914358.1 | 16602.2 | 277  |
| S475 |       | 45  | 10 | OAR10_35722333.1  | OAR10_57396545.1 | 21674.2 | 405  |
| S475 |       | 507 | 10 | OAR10_54127756.1  | s31288.1         | 7114.03 | 124  |
| S475 |       | 90  | 10 | s25185.1          | OAR10_68005037.1 | 11797.8 | 188  |
| S475 | CON   | 5   | 10 | OAR10_57171204.1  | OAR10_57396545.1 | 225.341 | 6    |
| S475 | UNION | 5   | 10 | OAR10_35722333.1  | OAR10_72914358.1 | 37192   | 664  |
| S476 |       | 157 | 10 | OAR10_44615697.1  | OAR10_46220373.1 | 1604.68 | 31   |
| S476 |       | 844 | 10 | OAR10_42283457.1  | OAR10_45140128.1 | 2856.67 | 42   |
| S476 |       | 702 | 10 | s49567.1          | OAR10_48462141.1 | 48462.1 | 914  |
| S476 |       | 829 | 10 | OAR10_33047233.1  | OAR10_51969493.1 | 18922.3 | 352  |
| S476 |       | 45  | 10 | OAR10_35722333.1  | OAR10_57396545.1 | 21674.2 | 405  |
| S476 | CON   | 5   | 10 | OAR10_44615697.1  | OAR10_45140128.1 | 524.431 | 10   |
| S476 | UNION | 5   | 10 | s49567.1          | OAR10_57396545.1 | 57396.5 | 1095 |
| S487 |       | 627 | 10 | s14601.1          | OAR10_7959969.1  | 1766.61 | 31   |
| S487 |       | 629 | 10 | OAR10_5271954.1   | OAR10_7507728.1  | 2235.77 | 34   |
| S487 |       | 702 | 10 | s49567.1          | OAR10_48462141.1 | 48462.1 | 914  |
| S487 |       | 126 | 10 | s49567.1          | OAR10_9585529.1  | 9585.53 | 173  |
| S487 |       | 61  | 10 | OAR10_5663903.1   | OAR10_7959969.1  | 2296.07 | 37   |
| S487 | CON   | 5   | 10 | s14601.1          | OAR10_7507728.1  | 1314.37 | 22   |
| S487 | UNION | 5   | 10 | s49567.1          | OAR10_48462141.1 | 48462.1 | 914  |
| S490 |       | 27  | 9  | s28418.1          | s60249.1         | 1605.72 | 34   |
| S490 |       | 616 | 9  | OAR9_85044633.1   | s64103.1         | 2852.17 | 62   |
| S490 |       | 29  | 9  | s64667.1          | OAR9_86159320.1  | 1397.64 | 37   |
| S490 |       | 702 | 9  | OAR9_38323108.1   | OAR9_96544082.1  | 58221   | 1087 |
| S490 |       | 140 | 9  | s32207.1          | OAR9_86395078.1  | 1208.25 | 31   |
| S490 | CON   | 5   | 9  | s28418.1          | OAR9_86159320.1  | 704.634 | 20   |
| S490 | UNION | 5   | 9  | OAR9_38323108.1   | OAR9_96544082.1  | 58221   | 1087 |
| S491 |       | 49  | 9  | OAR9_61830651.1   | OAR9_64551132.1  | 2720.48 | 58   |
| S491 |       | 629 | 9  | OAR9_55140044.1   | OAR9_63193973.1  | 8053.93 | 166  |
| S491 |       | 702 | 9  | OAR9_38323108.1   | OAR9_96544082.1  | 58221   | 1087 |
| S491 |       | 79  | 9  | OAR9_59326545.1   | OAR9_62308628.1  | 2982.08 | 60   |
| S491 |       | 27  | 9  | OAR9_61212902.1   | OAR9_65555411.1  | 4342.51 | 93   |
| S491 | CON   | 5   | 9  | OAR9_61830651.1   | OAR9_62308628.1  | 477.977 | 13   |
| S491 | UNION | 5   | 9  | OAR9_38323108.1   | OAR9_96544082.1  | 58221   | 1087 |
| S492 |       | 45  | 9  | s68634.1          | s50783.1         | 21048.3 | 358  |
| S492 |       | 61  | 9  | OAR9_31664097.1   | OAR9_36052313.1  | 4388.22 | 101  |
| S492 |       | 49  | 9  | OAR9_35522648_X.1 | s32613.1         | 1441.19 | 33   |



|      |       |     |   |                 |                 |         |     |
|------|-------|-----|---|-----------------|-----------------|---------|-----|
| S492 |       | 606 | 9 | OAR9_32239874.1 | DU427730_369.1  | 4216.13 | 94  |
| S492 |       | 79  | 9 | s73465.1        | OAR9_40771150.1 | 8319.46 | 179 |
| S492 | CON   | 5   | 9 | s68634.1        | OAR9_36052313.1 | 113.97  | 4   |
| S492 | UNION | 5   | 9 | OAR9_31664097.1 | s50783.1        | 25322.6 | 455 |
| S493 |       | 507 | 9 | s75518.1        | OAR9_26587263.1 | 2962.39 | 66  |
| S493 |       | 61  | 9 | OAR9_23382060.1 | s56435.1        | 7434.21 | 145 |
| S493 |       | 45  | 9 | OAR9_18493683.1 | s19052.1        | 5564.34 | 125 |
| S493 |       | 629 | 9 | s60705.1        | OAR9_25022978.1 | 2352.47 | 57  |
| S493 |       | 90  | 9 | s19462.1        | s01999.1        | 3928.4  | 85  |
| S493 | CON   | 5   | 9 | s75518.1        | s19052.1        | 433.147 | 12  |
| S493 | UNION | 5   | 9 | OAR9_18493683.1 | s56435.1        | 12322.6 | 252 |
| S495 |       | 801 | 9 | s54533.1        | s34916.1        | 1404.37 | 32  |
| S495 |       | 829 | 9 | s08221.1        | OAR9_22512802.1 | 3869.72 | 83  |
| S495 |       | 157 | 9 | OAR9_20964415.1 | OAR9_22488751.1 | 1524.34 | 35  |
| S495 |       | 844 | 9 | OAR9_20308781.1 | s36366.1        | 1348.29 | 30  |
| S495 |       | 45  | 9 | OAR9_18493683.1 | s19052.1        | 5564.34 | 125 |
| S495 | CON   | 5   | 9 | OAR9_20964415.1 | s36366.1        | 692.657 | 18  |
| S495 | UNION | 5   | 9 | OAR9_18493683.1 | s19052.1        | 5564.34 | 125 |
| S496 |       | 801 | 9 | s54533.1        | s34916.1        | 1404.37 | 32  |
| S496 |       | 829 | 9 | s08221.1        | OAR9_22512802.1 | 3869.72 | 83  |
| S496 |       | 126 | 9 | s59135.1        | OAR9_20804687.1 | 2341.2  | 49  |
| S496 |       | 45  | 9 | OAR9_18493683.1 | s19052.1        | 5564.34 | 125 |
| S496 |       | 844 | 9 | OAR9_20308781.1 | s36366.1        | 1348.29 | 30  |
| S496 | CON   | 5   | 9 | s54533.1        | OAR9_20804687.1 | 369.545 | 8   |
| S496 | UNION | 5   | 9 | s59135.1        | s19052.1        | 5594.54 | 126 |
| S501 |       | 606 | 8 | OAR8_95188605.1 | OAR8_97813729.1 | 2625.12 | 46  |
| S501 |       | 157 | 8 | s63436.1        | OAR8_97813729.1 | 2689.46 | 47  |
| S501 |       | 140 | 8 | s28231.1        | OAR8_97813729.1 | 2862.02 | 51  |
| S501 |       | 829 | 8 | s26722.1        | OAR8_95919216.1 | 1453.08 | 31  |
| S501 |       | 702 | 8 | DU492158_335.1  | OAR8_97813729.1 | 1947.16 | 32  |
| S501 | CON   | 5   | 8 | DU492158_335.1  | OAR8_95919216.1 | 52.651  | 4   |
| S501 | UNION | 5   | 8 | s26722.1        | OAR8_97813729.1 | 3347.59 | 59  |
| S502 |       | 507 | 8 | OAR8_85811057.1 | s41250.1        | 2810.84 | 53  |
| S502 |       | 829 | 8 | OAR8_84622702.1 | OAR8_85978703.1 | 1356    | 32  |
| S502 |       | 152 | 8 | OAR8_84448034.1 | s73153.1        | 1906.25 | 44  |
| S502 |       | 79  | 8 | OAR8_81635650.1 | OAR8_87540028.1 | 5904.38 | 127 |
| S502 |       | 49  | 8 | OAR8_77578890.1 | s01826.1        | 8664.11 | 175 |
| S502 | CON   | 5   | 8 | OAR8_85811057.1 | OAR8_85978703.1 | 167.646 | 5   |
| S502 | UNION | 5   | 8 | OAR8_77578890.1 | s41250.1        | 11043   | 217 |
| S503 |       | 627 | 8 | OAR8_58134022.1 | OAR8_62425494.1 | 4291.47 | 87  |
| S503 |       | 629 | 8 | OAR8_58134022.1 | OAR8_62425494.1 | 4291.47 | 87  |
| S503 |       | 152 | 8 | s15412.1        | OAR8_60953046.1 | 3152.82 | 68  |
| S503 |       | 801 | 8 | s15412.1        | s59082.1        | 2721.52 | 57  |
| S503 |       | 507 | 8 | s00060.1        | OAR8_60076974.1 | 6422.45 | 116 |
| S503 | CON   | 5   | 8 | OAR8_58134022.1 | OAR8_60076974.1 | 1942.95 | 41  |
| S503 | UNION | 5   | 8 | s00060.1        | OAR8_62425494.1 | 8770.97 | 162 |
| S506 |       | 152 | 8 | OAR8_31142913.1 | s09657.1        | 2031.21 | 41  |
| S506 |       | 126 | 8 | s69453.1        | s50983.1        | 4232.26 | 88  |

|      |       |     |   |                 |                 |         |     |
|------|-------|-----|---|-----------------|-----------------|---------|-----|
| S506 |       | 61  | 8 | s42406.1        | OAR8_37553450.1 | 5987.56 | 109 |
| S506 |       | 27  | 8 | OAR8_29706230.1 | s32939.1        | 3476.82 | 69  |
| S506 |       | 702 | 8 | OAR8_26793121.1 | OAR8_38710483.1 | 11917.4 | 231 |
| S506 | CON   | 5   | 8 | s42406.1        | s50983.1        | 836.493 | 18  |
| S506 | UNION | 5   | 8 | OAR8_26793121.1 | OAR8_38710483.1 | 11917.4 | 231 |
| S507 |       | 507 | 7 | s63808.1        | s09265.1        | 2218.56 | 49  |
| S507 |       | 606 | 7 | OAR7_86067111.1 | s67662.1        | 5534.67 | 111 |
| S507 |       | 123 | 7 | s13905.1        | OAR7_91483736.1 | 9054.19 | 169 |
| S507 |       | 79  | 7 | s24581.1        | s45225.1        | 1594.56 | 35  |
| S507 |       | 629 | 7 | s63353.1        | OAR7_89553402.1 | 1361.65 | 30  |
| S507 | CON   | 5   | 7 | s24581.1        | OAR7_89553402.1 | 1138.35 | 25  |
| S507 | UNION | 5   | 7 | s13905.1        | s67662.1        | 9172.24 | 171 |
| S512 |       | 616 | 7 | s03655.1        | OAR7_83970535.1 | 2138.66 | 41  |
| S512 |       | 844 | 7 | s03357.1        | s61284.1        | 4208.81 | 84  |
| S512 |       | 61  | 7 | OAR7_79189143.1 | s15556.1        | 5289.18 | 104 |
| S512 |       | 123 | 7 | s13905.1        | OAR7_91483736.1 | 9054.19 | 169 |
| S512 |       | 627 | 7 | OAR7_83694999.1 | s51006.1        | 1980.89 | 35  |
| S512 | CON   | 5   | 7 | OAR7_83694999.1 | OAR7_83970535.1 | 275.536 | 6   |
| S512 | UNION | 5   | 7 | OAR7_79189143.1 | OAR7_91483736.1 | 12294.6 | 237 |
| S513 |       | 90  | 7 | OAR7_75710157.1 | OAR7_78025265.1 | 2315.11 | 46  |
| S513 |       | 123 | 7 | s26564.1        | OAR7_77993710.1 | 3439.34 | 64  |
| S513 |       | 29  | 7 | OAR7_56240366.1 | OAR7_77667178.1 | 21426.8 | 390 |
| S513 |       | 507 | 7 | OAR7_74283088.1 | s36799.1        | 3100.68 | 60  |
| S513 |       | 49  | 7 | OAR7_75483123.1 | OAR7_78083739.1 | 2600.62 | 54  |
| S513 | CON   | 5   | 7 | OAR7_75710157.1 | s36799.1        | 1673.61 | 35  |
| S513 | UNION | 5   | 7 | OAR7_56240366.1 | OAR7_78083739.1 | 21843.4 | 398 |
| S515 |       | 123 | 7 | s03425.1        | OAR7_70071978.1 | 2562.47 | 40  |
| S515 |       | 606 | 7 | OAR7_64620807.1 | OAR7_67914634.1 | 3293.83 | 62  |
| S515 |       | 702 | 7 | OAR7_31685912.1 | OAR7_72973471.1 | 41287.6 | 769 |
| S515 |       | 507 | 7 | OAR7_52043940.1 | OAR7_71832636.1 | 19788.7 | 355 |
| S515 |       | 29  | 7 | OAR7_56240366.1 | OAR7_77667178.1 | 21426.8 | 390 |
| S515 | CON   | 5   | 7 | s03425.1        | OAR7_67914634.1 | 405.124 | 10  |
| S515 | UNION | 5   | 7 | OAR7_31685912.1 | OAR7_77667178.1 | 45981.3 | 865 |
| S516 |       | 844 | 7 | OAR7_62972902.1 | OAR7_64550152.1 | 1577.25 | 30  |
| S516 |       | 606 | 7 | OAR7_61396840.1 | OAR7_63848145.1 | 2451.3  | 41  |
| S516 |       | 702 | 7 | OAR7_31685912.1 | OAR7_72973471.1 | 41287.6 | 769 |
| S516 |       | 507 | 7 | OAR7_52043940.1 | OAR7_71832636.1 | 19788.7 | 355 |
| S516 |       | 29  | 7 | OAR7_56240366.1 | OAR7_77667178.1 | 21426.8 | 390 |
| S516 | CON   | 5   | 7 | OAR7_62972902.1 | OAR7_63848145.1 | 875.243 | 17  |
| S516 | UNION | 5   | 7 | OAR7_31685912.1 | OAR7_77667178.1 | 45981.3 | 865 |
| S520 |       | 45  | 7 | OAR7_31172405.1 | OAR7_58958307.1 | 27785.9 | 542 |
| S520 |       | 702 | 7 | OAR7_31685912.1 | OAR7_72973471.1 | 41287.6 | 769 |
| S520 |       | 507 | 7 | OAR7_52043940.1 | OAR7_71832636.1 | 19788.7 | 355 |
| S520 |       | 844 | 7 | OAR7_52759167.1 | s62604.1        | 2272.8  | 40  |
| S520 |       | 616 | 7 | OAR7_54780217.1 | s36119.1        | 5323.48 | 103 |
| S520 | CON   | 5   | 7 | OAR7_54780217.1 | s62604.1        | 251.749 | 7   |
| S520 | UNION | 5   | 7 | OAR7_31172405.1 | OAR7_72973471.1 | 41801.1 | 782 |
| S521 |       | 45  | 7 | OAR7_31172405.1 | OAR7_58958307.1 | 27785.9 | 542 |

|      |       |     |   |                   |                 |         |     |
|------|-------|-----|---|-------------------|-----------------|---------|-----|
| S521 |       | 702 | 7 | OAR7_31685912.1   | OAR7_72973471.1 | 41287.6 | 769 |
| S521 |       | 27  | 7 | OAR7_51824628.1   | s56915.1        | 1393.42 | 30  |
| S521 |       | 507 | 7 | OAR7_52043940.1   | OAR7_71832636.1 | 19788.7 | 355 |
| S521 |       | 844 | 7 | OAR7_52759167.1   | s62604.1        | 2272.8  | 40  |
| S521 | CON   | 5   | 7 | OAR7_52759167.1   | s56915.1        | 458.877 | 10  |
| S521 | UNION | 5   | 7 | OAR7_31172405.1   | OAR7_72973471.1 | 41801.1 | 782 |
| S522 |       | 45  | 7 | OAR7_31172405.1   | OAR7_58958307.1 | 27785.9 | 542 |
| S522 |       | 702 | 7 | OAR7_31685912.1   | OAR7_72973471.1 | 41287.6 | 769 |
| S522 |       | 606 | 7 | s01468.1          | OAR7_50490234.1 | 5451.27 | 98  |
| S522 |       | 49  | 7 | OAR7_46559347.1   | s73999.1        | 2867.31 | 47  |
| S522 |       | 123 | 7 | s02669.1          | OAR7_50322674.1 | 1244.94 | 30  |
| S522 | CON   | 5   | 7 | s02669.1          | s73999.1        | 348.919 | 8   |
| S522 | UNION | 5   | 7 | OAR7_31172405.1   | OAR7_72973471.1 | 41801.1 | 782 |
| S523 |       | 49  | 7 | OAR7_46559347.1   | s73999.1        | 2867.31 | 47  |
| S523 |       | 40  | 7 | OAR7_43593010.1   | OAR7_46818598.1 | 3225.59 | 57  |
| S523 |       | 45  | 7 | OAR7_31172405.1   | OAR7_58958307.1 | 27785.9 | 542 |
| S523 |       | 702 | 7 | OAR7_31685912.1   | OAR7_72973471.1 | 41287.6 | 769 |
| S523 |       | 606 | 7 | s01468.1          | OAR7_50490234.1 | 5451.27 | 98  |
| S523 | CON   | 5   | 7 | OAR7_46559347.1   | OAR7_46818598.1 | 259.251 | 5   |
| S523 | UNION | 5   | 7 | OAR7_31172405.1   | OAR7_72973471.1 | 41801.1 | 782 |
| S524 |       | 40  | 7 | OAR7_43593010.1   | OAR7_46818598.1 | 3225.59 | 57  |
| S524 |       | 90  | 7 | OAR7_43374818.1   | OAR7_46455757.1 | 3080.94 | 57  |
| S524 |       | 45  | 7 | OAR7_31172405.1   | OAR7_58958307.1 | 27785.9 | 542 |
| S524 |       | 702 | 7 | OAR7_31685912.1   | OAR7_72973471.1 | 41287.6 | 769 |
| S524 |       | 606 | 7 | s01468.1          | OAR7_50490234.1 | 5451.27 | 98  |
| S524 | CON   | 5   | 7 | s01468.1          | OAR7_46455757.1 | 1416.8  | 23  |
| S524 | UNION | 5   | 7 | OAR7_31172405.1   | OAR7_72973471.1 | 41801.1 | 782 |
| S525 |       | 140 | 6 | OAR6_52856067.1   | OAR6_55285058.1 | 2428.99 | 47  |
| S525 |       | 79  | 6 | OAR6_51660421.1   | s21191.1        | 10134.5 | 185 |
| S525 |       | 629 | 6 | OAR6_50229073_X.1 | DU523483_560.1  | 2868.91 | 57  |
| S525 |       | 627 | 6 | OAR6_48108133.1   | DU523483_560.1  | 4989.86 | 104 |
| S525 |       | 702 | 6 | s10352.1          | OAR6_55321610.1 | 5954.38 | 118 |
| S525 | CON   | 5   | 6 | OAR6_52856067.1   | DU523483_560.1  | 241.922 | 7   |
| S525 | UNION | 5   | 6 | OAR6_48108133.1   | s21191.1        | 13686.8 | 263 |
| S529 |       | 629 | 6 | OAR6_50229073_X.1 | DU523483_560.1  | 2868.91 | 57  |
| S529 |       | 627 | 6 | OAR6_48108133.1   | DU523483_560.1  | 4989.86 | 104 |
| S529 |       | 45  | 6 | OAR6_38919831.1   | OAR6_50590550.1 | 11670.7 | 219 |
| S529 |       | 29  | 6 | s50591.1          | OAR6_50860226.1 | 1669.38 | 39  |
| S529 |       | 702 | 6 | s10352.1          | OAR6_55321610.1 | 5954.38 | 118 |
| S529 | CON   | 5   | 6 | OAR6_50229073_X.1 | OAR6_50590550.1 | 361.476 | 9   |
| S529 | UNION | 5   | 6 | OAR6_38919831.1   | OAR6_55321610.1 | 16401.8 | 308 |
| S530 |       | 29  | 6 | s50591.1          | OAR6_50860226.1 | 1669.38 | 39  |
| S530 |       | 140 | 6 | s73122.1          | OAR6_49463357.1 | 26607.7 | 513 |
| S530 |       | 627 | 6 | OAR6_48108133.1   | DU523483_560.1  | 4989.86 | 104 |
| S530 |       | 45  | 6 | OAR6_38919831.1   | OAR6_50590550.1 | 11670.7 | 219 |
| S530 |       | 702 | 6 | s10352.1          | OAR6_55321610.1 | 5954.38 | 118 |
| S530 | CON   | 5   | 6 | s10352.1          | OAR6_49463357.1 | 96.13   | 3   |
| S530 | UNION | 5   | 6 | s73122.1          | OAR6_55321610.1 | 32465.9 | 628 |

|      |       |     |   |                   |                  |         |     |
|------|-------|-----|---|-------------------|------------------|---------|-----|
| S531 |       | 29  | 5 | OAR5_99590053_X.1 | OAR5_102165646.1 | 2575.59 | 53  |
| S531 |       | 61  | 5 | s48412.1          | OAR5_102547933.1 | 4624.25 | 102 |
| S531 |       | 627 | 5 | s09048.1          | OAR5_100090515.1 | 6457.02 | 134 |
| S531 |       | 702 | 5 | OAR5_77977258.1   | OAR5_100127181.1 | 22149.9 | 428 |
| S531 |       | 606 | 5 | OAR5_98030869.1   | OAR5_100699982.1 | 2669.11 | 58  |
| S531 | CON   | 5   | 5 | OAR5_99590053_X.1 | OAR5_100090515.1 | 500.461 | 11  |
| S531 | UNION | 5   | 5 | OAR5_77977258.1   | OAR5_102547933.1 | 24570.7 | 480 |
| S534 |       | 27  | 5 | OAR5_79542638.1   | s15500.1         | 5963.32 | 115 |
| S534 |       | 629 | 5 | OAR5_76098058.1   | OAR5_81196810.1  | 5098.75 | 99  |
| S534 |       | 606 | 5 | OAR5_70256606.1   | OAR5_82901477.1  | 12644.9 | 245 |
| S534 |       | 702 | 5 | OAR5_77977258.1   | OAR5_100127181.1 | 22149.9 | 428 |
| S534 |       | 844 | 5 | OAR5_79669328.1   | OAR5_82093890.1  | 2424.56 | 46  |
| S534 | CON   | 5   | 5 | OAR5_79669328.1   | OAR5_81196810.1  | 1527.48 | 30  |
| S534 | UNION | 5   | 5 | OAR5_70256606.1   | OAR5_100127181.1 | 29870.6 | 580 |
| S535 |       | 627 | 5 | OAR5_69570106.1   | OAR5_71156734.1  | 1586.63 | 30  |
| S535 |       | 801 | 5 | s11947.1          | OAR5_69909638.1  | 1818.53 | 34  |
| S535 |       | 123 | 5 | OAR5_67426945.1   | OAR5_70029869.1  | 2602.92 | 48  |
| S535 |       | 126 | 5 | s52618.1          | OAR5_72565538.1  | 7244.72 | 139 |
| S535 |       | 629 | 5 | OAR5_57983508.1   | OAR5_71824766.1  | 13841.3 | 230 |
| S535 | CON   | 5   | 5 | OAR5_69570106.1   | OAR5_69909638.1  | 339.532 | 7   |
| S535 | UNION | 5   | 5 | OAR5_57983508.1   | OAR5_72565538.1  | 14582   | 241 |
| S536 |       | 507 | 5 | OAR5_49532219.1   | s07760.1         | 3268.6  | 64  |
| S536 |       | 152 | 5 | s12940.1          | OAR5_61924626.1  | 14110.5 | 253 |
| S536 |       | 801 | 5 | OAR5_47774570.1   | s54250.1         | 7553.49 | 151 |
| S536 |       | 140 | 5 | OAR5_52351898.1   | OAR5_58830573.1  | 6478.68 | 118 |
| S536 |       | 556 | 5 | OAR5_50919104.1   | s07760.1         | 1881.71 | 35  |
| S536 | CON   | 5   | 5 | OAR5_52351898.1   | s07760.1         | 448.918 | 8   |
| S536 | UNION | 5   | 5 | OAR5_47774570.1   | OAR5_61924626.1  | 14150.1 | 254 |
| S540 |       | 627 | 5 | s71007.1          | s04774.1         | 5048.15 | 85  |
| S540 |       | 629 | 5 | s71007.1          | s04774.1         | 5048.15 | 85  |
| S540 |       | 152 | 5 | s12940.1          | OAR5_61924626.1  | 14110.5 | 253 |
| S540 |       | 801 | 5 | OAR5_47774570.1   | s54250.1         | 7553.49 | 151 |
| S540 |       | 157 | 5 | s37412.1          | s21988.1         | 1297.99 | 34  |
| S540 | CON   | 5   | 5 | s37412.1          | s04774.1         | 390.301 | 11  |
| S540 | UNION | 5   | 5 | s71007.1          | OAR5_61924626.1  | 18107.3 | 314 |
| S541 |       | 627 | 5 | s71007.1          | s04774.1         | 5048.15 | 85  |
| S541 |       | 629 | 5 | s71007.1          | s04774.1         | 5048.15 | 85  |
| S541 |       | 45  | 5 | s71007.1          | s06750.1         | 4481.91 | 70  |
| S541 |       | 152 | 5 | s12940.1          | OAR5_61924626.1  | 14110.5 | 253 |
| S541 |       | 801 | 5 | OAR5_47774570.1   | s54250.1         | 7553.49 | 151 |
| S541 | CON   | 5   | 5 | s12940.1          | s06750.1         | 485.088 | 9   |
| S541 | UNION | 5   | 5 | s71007.1          | OAR5_61924626.1  | 18107.3 | 314 |
| S544 |       | 844 | 5 | s59427.1          | s48689.1         | 1975.08 | 36  |
| S544 |       | 140 | 5 | s59427.1          | OAR5_19459135.1  | 1893.42 | 34  |
| S544 |       | 629 | 5 | OAR5_17235395.1   | s17924.1         | 1949.73 | 32  |
| S544 |       | 61  | 5 | OAR5_12770106.1   | OAR5_22276454.1  | 9506.35 | 152 |
| S544 |       | 45  | 5 | OAR5_10884558.1   | s06935.1         | 11513.7 | 188 |
| S544 | CON   | 5   | 5 | s59427.1          | s17924.1         | 1619.41 | 28  |
| S544 | UNION | 5   | 5 | OAR5_10884558.1   | s06935.1         | 11513.7 | 188 |

|      |       |     |   |                    |                    |         |     |
|------|-------|-----|---|--------------------|--------------------|---------|-----|
| S545 |       | 157 | 4 | OAR4_61284730.1    | s64810.1           | 2274.83 | 45  |
| S545 |       | 27  | 4 | DU194821_342.1     | OAR4_61284730.1    | 14228.1 | 279 |
| S545 |       | 29  | 4 | DU194821_342.1     | OAR4_61284730.1    | 14228.1 | 279 |
| S545 |       | 702 | 4 | s58367.1           | OAR4_85483475.1    | 25992.5 | 514 |
| S545 |       | 152 | 4 | OAR4_60126261.1    | OAR4_62657058.1    | 2530.8  | 55  |
| S545 | CON   | 5   | 4 | OAR4_61284730.1    | OAR4_61284730.1    | 0       | 1   |
| S545 | UNION | 5   | 4 | DU194821_342.1     | OAR4_85483475.1    | 38426.9 | 752 |
| S546 |       | 606 | 4 | OAR4_56704521.1    | s00703.1           | 2537.16 | 45  |
| S546 |       | 27  | 4 | DU194821_342.1     | OAR4_61284730.1    | 14228.1 | 279 |
| S546 |       | 29  | 4 | DU194821_342.1     | OAR4_61284730.1    | 14228.1 | 279 |
| S546 |       | 627 | 4 | OAR4_55669092.1    | OAR4_60497897.1    | 4828.81 | 98  |
| S546 |       | 45  | 4 | OAR4_55744716.1    | OAR4_60926085.1    | 5181.37 | 106 |
| S546 | CON   | 5   | 4 | OAR4_56704521.1    | s00703.1           | 2537.16 | 45  |
| S546 | UNION | 5   | 4 | DU194821_342.1     | OAR4_61284730.1    | 14228.1 | 279 |
| S553 |       | 79  | 4 | OAR4_44621948.1    | s02754.1           | 1716.92 | 31  |
| S553 |       | 45  | 4 | OAR4_43198108.1    | s67196.1           | 8975.51 | 158 |
| S553 |       | 844 | 4 | OAR4_42488888.1    | OAR4_45213543_X.1  | 2724.66 | 51  |
| S553 |       | 61  | 4 | OAR4_39813653.1    | OAR4_56340637.1    | 16527   | 308 |
| S553 |       | 606 | 4 | OAR4_37940876.1    | OAR4_55963926.1    | 18023   | 344 |
| S553 | CON   | 5   | 4 | OAR4_44621948.1    | OAR4_45213543_X.1  | 591.596 | 13  |
| S553 | UNION | 5   | 4 | OAR4_37940876.1    | OAR4_56340637.1    | 18399.8 | 352 |
| S554 |       | 627 | 4 | OAR4_31796734.1    | OAR4_36438393.1    | 4641.66 | 71  |
| S554 |       | 152 | 4 | OAR4_30536811.1    | OAR4_32059279.1    | 1522.47 | 34  |
| S554 |       | 844 | 4 | OAR4_29851251.1    | OAR4_31996653.1    | 2145.4  | 46  |
| S554 |       | 157 | 4 | OAR4_29369957.1    | OAR4_33022606_X.1  | 3652.65 | 73  |
| S554 |       | 606 | 4 | OAR4_29369957.1    | OAR4_32671208.1    | 3301.25 | 67  |
| S554 | CON   | 5   | 4 | OAR4_31796734.1    | OAR4_31996653.1    | 199.919 | 4   |
| S554 | UNION | 5   | 4 | OAR4_29369957.1    | OAR4_36438393.1    | 7068.44 | 120 |
| S555 |       | 829 | 4 | OAR4_3610903.1     | OAR4_5767890.1     | 2156.99 | 39  |
| S555 |       | 702 | 4 | OARUn.284_293028.1 | OAR4_24251309.1    | 24251.3 | 470 |
| S555 |       | 629 | 4 | OAR4_5638574.1     | OAR4_7712644.1     | 2074.07 | 44  |
| S555 |       | 29  | 4 | OAR4_742452.1      | OAR4_5847332.1     | 5104.88 | 85  |
| S555 |       | 61  | 4 | OAR4_3630456.1     | s45567.1           | 2316.36 | 42  |
| S555 | CON   | 5   | 4 | OAR4_5638574.1     | OAR4_5767890.1     | 129.316 | 3   |
| S555 | UNION | 5   | 4 | OARUn.284_293028.1 | OAR4_24251309.1    | 24251.3 | 470 |
| S568 |       | 152 | 3 | s32572.1           | s24635.1           | 3235.68 | 40  |
| S568 |       | 79  | 3 | OAR3_217297404.1   | OAR3_218733455.1   | 1436.05 | 32  |
| S568 |       | 627 | 3 | OAR3_216714207.1   | s32572.1           | 1813.47 | 38  |
| S568 |       | 629 | 3 | OAR3_216714207.1   | s32572.1           | 1813.47 | 38  |
| S568 |       | 616 | 3 | OAR3_209072421.1   | OAR3_222052522.1   | 12980.1 | 230 |
| S568 | CON   | 5   | 3 | s32572.1           | s32572.1           | 0       | 1   |
| S568 | UNION | 5   | 3 | OAR3_209072421.1   | OAR3_222052522.1   | 12980.1 | 230 |
| S569 |       | 123 | 3 | s09050.1           | OAR3_202943170.1   | 11054.8 | 191 |
| S569 |       | 627 | 3 | s00725.1           | OAR3_192440268.1   | 1619.58 | 33  |
| S569 |       | 629 | 3 | s00725.1           | OAR3_192440268.1   | 1619.58 | 33  |
| S569 |       | 702 | 3 | OAR3_190128314.1   | OAR3_194730311.1   | 4602    | 79  |
| S569 |       | 507 | 3 | OAR3_179244393.1   | OAR3_211362922_X.1 | 32118.5 | 604 |
| S569 | CON   | 5   | 3 | s09050.1           | OAR3_192440268.1   | 551.943 | 13  |

|      |       |     |   |                    |                    |         |     |
|------|-------|-----|---|--------------------|--------------------|---------|-----|
| S569 | UNION | 5   | 3 | OAR3_179244393.1   | OAR3_211362922_X.1 | 32118.5 | 604 |
| S570 |       | 627 | 3 | OAR3_155236610.1   | s75549.1           | 19415.4 | 375 |
| S570 |       | 629 | 3 | OAR3_155236610.1   | s75549.1           | 19415.4 | 375 |
| S570 |       | 126 | 3 | OAR3_152741614.1   | OAR3_163942175.1   | 11200.6 | 212 |
| S570 |       | 27  | 3 | OAR3_156830410.1   | OAR3_158745008_X.1 | 1914.6  | 36  |
| S570 |       | 507 | 3 | OAR3_156766007_X.1 | OAR3_158584850_X.1 | 1818.84 | 33  |
| S570 | CON   | 5   | 3 | OAR3_156830410.1   | OAR3_158584850_X.1 | 1754.44 | 32  |
| S570 | UNION | 5   | 3 | OAR3_152741614.1   | s75549.1           | 21910.4 | 419 |
| S580 |       | 45  | 3 | OAR3_134591031.1   | OAR3_135863920.1   | 1272.89 | 30  |
| S580 |       | 616 | 3 | OAR3_134547477.1   | OAR3_136948456.1   | 2400.98 | 51  |
| S580 |       | 152 | 3 | OAR3_134370389.1   | OAR3_137497257.1   | 3126.87 | 67  |
| S580 |       | 90  | 3 | OAR3_129044189.1   | OAR3_134747538.1   | 5703.35 | 108 |
| S580 |       | 61  | 3 | OAR3_134416842.1   | OAR3_136398703.1   | 1981.86 | 43  |
| S580 | CON   | 5   | 3 | OAR3_134591031.1   | OAR3_134747538.1   | 156.507 | 3   |
| S580 | UNION | 5   | 3 | OAR3_129044189.1   | OAR3_137497257.1   | 8453.07 | 166 |
| S581 |       | 801 | 3 | OAR3_115651452.1   | OAR3_118053045.1   | 2401.59 | 50  |
| S581 |       | 702 | 3 | OAR3_115651452.1   | OAR3_117843556.1   | 2192.1  | 44  |
| S581 |       | 629 | 3 | OAR3_112096089.1   | OAR3_121762751.1   | 9666.66 | 172 |
| S581 |       | 152 | 3 | OAR3_115651452.1   | s09346.1           | 3379.64 | 69  |
| S581 |       | 616 | 3 | OAR3_115651452.1   | OAR3_118690316.1   | 3038.86 | 63  |
| S581 | CON   | 5   | 3 | OAR3_115651452.1   | OAR3_117843556.1   | 2192.1  | 44  |
| S581 | UNION | 5   | 3 | OAR3_112096089.1   | OAR3_121762751.1   | 9666.66 | 172 |
| S582 |       | 801 | 3 | s65769.1           | s18106.1           | 5900.44 | 108 |
| S582 |       | 702 | 3 | s04344.1           | s28807.1           | 1280.72 | 33  |
| S582 |       | 27  | 3 | OAR3_108120929.1   | s42653.1           | 2413.72 | 44  |
| S582 |       | 79  | 3 | s00521.1           | s51141.1           | 3995.25 | 72  |
| S582 |       | 29  | 3 | s29822.1           | s42653.1           | 3721.94 | 77  |
| S582 | CON   | 5   | 3 | OAR3_108120929.1   | s28807.1           | 169.787 | 4   |
| S582 | UNION | 5   | 3 | s29822.1           | s18106.1           | 6131.25 | 113 |
| S583 |       | 152 | 3 | OAR3_78511530.1    | OAR3_80763380.1    | 2251.85 | 51  |
| S583 |       | 507 | 3 | OAR3_77718162.1    | OAR3_82856188.1    | 5138.03 | 112 |
| S583 |       | 702 | 3 | OAR3_78338656.1    | s45788.1           | 2098.32 | 48  |
| S583 |       | 123 | 3 | OAR3_78338656.1    | s45788.1           | 2098.32 | 48  |
| S583 |       | 49  | 3 | OAR3_79159004.1    | OAR3_80722364.1    | 1563.36 | 38  |
| S583 | CON   | 5   | 3 | OAR3_79159004.1    | s45788.1           | 1277.97 | 32  |
| S583 | UNION | 5   | 3 | OAR3_77718162.1    | OAR3_82856188.1    | 5138.03 | 112 |
| S585 |       | 702 | 3 | s57378.1           | OAR3_74933537.1    | 1989.28 | 43  |
| S585 |       | 45  | 3 | OAR3_70204674.1    | s57378.1           | 2739.58 | 51  |
| S585 |       | 829 | 3 | OAR3_67058161.1    | OAR3_74604120.1    | 7545.96 | 148 |
| S585 |       | 157 | 3 | OAR3_70578986.1    | OAR3_76536013.1    | 5957.03 | 117 |
| S585 |       | 801 | 3 | OAR3_72317520.1    | OAR3_74181493.1    | 1863.97 | 40  |
| S585 | CON   | 5   | 3 | s57378.1           | s57378.1           | 0       | 1   |
| S585 | UNION | 5   | 3 | OAR3_67058161.1    | OAR3_76536013.1    | 9477.85 | 187 |
| S588 |       | 829 | 3 | OAR3_67058161.1    | OAR3_74604120.1    | 7545.96 | 148 |
| S588 |       | 27  | 3 | OAR3_64474656.1    | OAR3_67137932.1    | 2663.28 | 53  |
| S588 |       | 49  | 3 | OAR3_66440567_X.1  | OAR3_68372978.1    | 1932.41 | 42  |
| S588 |       | 61  | 3 | s40974.1           | OAR3_68372978.1    | 2366.7  | 50  |
| S588 |       | 123 | 3 | s24884.1           | OAR3_67751047.1    | 1949.75 | 42  |

|      |       |     |   |                    |                    |         |      |
|------|-------|-----|---|--------------------|--------------------|---------|------|
| S588 | CON   | 5   | 3 | OAR3_67058161.1    | OAR3_67137932.1    | 79.771  | 3    |
| S588 | UNION | 5   | 3 | OAR3_64474656.1    | OAR3_74604120.1    | 10129.5 | 198  |
| S592 |       | 27  | 3 | OAR3_64474656.1    | OAR3_67137932.1    | 2663.28 | 53   |
| S592 |       | 40  | 3 | OAR3_64474656.1    | OAR3_66798124.1    | 2323.47 | 45   |
| S592 |       | 49  | 3 | OAR3_66440567_X.1  | OAR3_68372978.1    | 1932.41 | 42   |
| S592 |       | 61  | 3 | s40974.1           | OAR3_68372978.1    | 2366.7  | 50   |
| S592 |       | 123 | 3 | s24884.1           | OAR3_67751047.1    | 1949.75 | 42   |
| S592 | CON   | 5   | 3 | OAR3_66440567_X.1  | OAR3_66798124.1    | 357.557 | 7    |
| S592 | UNION | 5   | 3 | OAR3_64474656.1    | OAR3_68372978.1    | 3898.32 | 80   |
| S593 |       | 27  | 3 | OAR3_64474656.1    | OAR3_67137932.1    | 2663.28 | 53   |
| S593 |       | 40  | 3 | OAR3_64474656.1    | OAR3_66798124.1    | 2323.47 | 45   |
| S593 |       | 627 | 3 | OAR3_64474656.1    | OAR3_66317995.1    | 1843.34 | 37   |
| S593 |       | 45  | 3 | s45049.1           | OAR3_66317995.1    | 4167.71 | 82   |
| S593 |       | 702 | 3 | s50340.1           | s35506.1           | 2560.33 | 53   |
| S593 | CON   | 5   | 3 | OAR3_64474656.1    | s35506.1           | 299.148 | 9    |
| S593 | UNION | 5   | 3 | s45049.1           | OAR3_67137932.1    | 4987.65 | 98   |
| S595 |       | 27  | 3 | OAR3_18901084_X.1  | OAR3_22495716.1    | 3594.63 | 81   |
| S595 |       | 61  | 3 | s65199.1           | s62291.1           | 2512.95 | 62   |
| S595 |       | 702 | 3 | DU259120_464.1     | OAR3_59494261.1    | 59494.3 | 1111 |
| S595 |       | 79  | 3 | OAR3_17718190.1    | OAR3_24559969.1    | 6841.78 | 153  |
| S595 |       | 507 | 3 | s49768.1           | OAR3_28567790.1    | 9061.66 | 193  |
| S595 | CON   | 5   | 3 | s49768.1           | s62291.1           | 789.164 | 20   |
| S595 | UNION | 5   | 3 | DU259120_464.1     | OAR3_59494261.1    | 59494.3 | 1111 |
| S598 |       | 123 | 3 | s36039.1           | OAR3_18087923.1    | 2271.09 | 47   |
| S598 |       | 629 | 3 | s36039.1           | OAR3_18087923.1    | 2271.09 | 47   |
| S598 |       | 702 | 3 | DU259120_464.1     | OAR3_59494261.1    | 59494.3 | 1111 |
| S598 |       | 79  | 3 | OAR3_17718190.1    | OAR3_24559969.1    | 6841.78 | 153  |
| S598 |       | 61  | 3 | s65199.1           | s62291.1           | 2512.95 | 62   |
| S598 | CON   | 5   | 3 | s65199.1           | OAR3_18087923.1    | 305.577 | 9    |
| S598 | UNION | 5   | 3 | DU259120_464.1     | OAR3_59494261.1    | 59494.3 | 1111 |
| S603 |       | 79  | 2 | s71223.1           | s55376.1           | 1830.55 | 40   |
| S603 |       | 627 | 2 | OAR2_257231205.1   | OAR2_260008602.1   | 2777.4  | 52   |
| S603 |       | 629 | 2 | OAR2_257231205.1   | OAR2_260008602.1   | 2777.4  | 52   |
| S603 |       | 123 | 2 | OAR2_258146403_X.1 | s71223.1           | 1445.95 | 30   |
| S603 |       | 702 | 2 | OAR2_252278273.1   | s29579.1           | 10830.2 | 215  |
| S603 | CON   | 5   | 2 | s71223.1           | s71223.1           | 0       | 1    |
| S603 | UNION | 5   | 2 | OAR2_252278273.1   | s29579.1           | 10830.2 | 215  |
| S611 |       | 702 | 2 | OAR2_252278273.1   | s29579.1           | 10830.2 | 215  |
| S611 |       | 29  | 2 | OAR2_238444943.1   | s43939.1           | 16224.6 | 314  |
| S611 |       | 606 | 2 | OAR2_250716720.1   | OAR2_253423292_X.1 | 2706.57 | 51   |
| S611 |       | 801 | 2 | OAR2_251639875.1   | s61009.1           | 1651.34 | 32   |
| S611 |       | 829 | 2 | s19317.1           | OAR2_253758268_X.1 | 1765.93 | 31   |
| S611 | CON   | 5   | 2 | OAR2_252278273.1   | s61009.1           | 1012.95 | 21   |
| S611 | UNION | 5   | 2 | OAR2_238444943.1   | s29579.1           | 24663.6 | 487  |
| S612 |       | 629 | 2 | OAR2_242229131.1   | DU503161_123.1     | 7148.91 | 146  |
| S612 |       | 627 | 2 | OAR2_238165550.1   | OAR2_246045571.1   | 7880.02 | 156  |
| S612 |       | 123 | 2 | OAR2_235417778.1   | OAR2_244336911.1   | 8919.13 | 185  |
| S612 |       | 29  | 2 | OAR2_238444943.1   | s43939.1           | 16224.6 | 314  |

|      |       |     |   |                  |                  |         |     |
|------|-------|-----|---|------------------|------------------|---------|-----|
| S612 |       | 844 | 2 | OAR2_243206127.1 | OAR2_245289710.1 | 2083.58 | 41  |
| S612 | CON   | 5   | 2 | OAR2_243206127.1 | OAR2_244336911.1 | 1130.78 | 24  |
| S612 | UNION | 5   | 2 | OAR2_235417778.1 | s43939.1         | 19251.7 | 381 |
| S615 |       | 90  | 2 | OAR2_170073165.1 | OAR2_173940252.1 | 3867.09 | 87  |
| S615 |       | 140 | 2 | OAR2_169232830.1 | OAR2_172379160.1 | 3146.33 | 68  |
| S615 |       | 606 | 2 | OAR2_169232830.1 | s72026.1         | 1949.14 | 41  |
| S615 |       | 507 | 2 | OAR2_167852063.1 | OAR2_173821801.1 | 5969.74 | 125 |
| S615 |       | 123 | 2 | OAR2_167959232.1 | OAR2_176091475.1 | 8132.24 | 171 |
| S615 | CON   | 5   | 2 | OAR2_170073165.1 | s72026.1         | 1108.81 | 26  |
| S615 | UNION | 5   | 2 | OAR2_167852063.1 | OAR2_176091475.1 | 8239.41 | 174 |
| S616 |       | 152 | 2 | s39150.1         | OAR2_166756467.1 | 5092.89 | 98  |
| S616 |       | 507 | 2 | OAR2_158519928.1 | OAR2_163536981.1 | 5017.05 | 97  |
| S616 |       | 702 | 2 | s54108.1         | OAR2_162167662.1 | 23623.2 | 482 |
| S616 |       | 90  | 2 | OAR2_160912478.1 | s22217.1         | 3583.91 | 72  |
| S616 |       | 40  | 2 | s39150.1         | s70789.1         | 3202.21 | 62  |
| S616 | CON   | 5   | 2 | s39150.1         | OAR2_162167662.1 | 504.088 | 11  |
| S616 | UNION | 5   | 2 | s54108.1         | OAR2_166756467.1 | 28212   | 569 |
| S617 |       | 507 | 2 | OAR2_158519928.1 | OAR2_163536981.1 | 5017.05 | 97  |
| S617 |       | 152 | 2 | OAR2_157048544.1 | OAR2_159191106.1 | 2142.56 | 43  |
| S617 |       | 627 | 2 | OAR2_155425432.1 | OAR2_160296103.1 | 4870.67 | 100 |
| S617 |       | 606 | 2 | s01065.1         | s72813.1         | 6497.5  | 138 |
| S617 |       | 702 | 2 | s54108.1         | OAR2_162167662.1 | 23623.2 | 482 |
| S617 | CON   | 5   | 2 | OAR2_158519928.1 | OAR2_159191106.1 | 671.178 | 13  |
| S617 | UNION | 5   | 2 | s54108.1         | OAR2_163536981.1 | 24992.5 | 505 |
| S619 |       | 45  | 2 | s52793.1         | OAR2_74821030.1  | 1573.02 | 33  |
| S619 |       | 29  | 2 | OAR2_73146917.1  | OAR2_74924055.1  | 1777.14 | 37  |
| S619 |       | 49  | 2 | OAR2_61907594.1  | OAR2_74652390.1  | 12744.8 | 265 |
| S619 |       | 61  | 2 | OAR2_72802015.1  | OAR2_80118756.1  | 7316.74 | 138 |
| S619 |       | 606 | 2 | OAR2_74253113.1  | OAR2_82226321.1  | 7973.21 | 148 |
| S619 | CON   | 5   | 2 | OAR2_74253113.1  | OAR2_74652390.1  | 399.277 | 10  |
| S619 | UNION | 5   | 2 | OAR2_61907594.1  | OAR2_82226321.1  | 20318.7 | 403 |
| S620 |       | 45  | 2 | OAR2_65431232.1  | OAR2_67968106.1  | 2536.87 | 50  |
| S620 |       | 40  | 2 | OAR2_63943896.1  | s59858.1         | 2994.2  | 62  |
| S620 |       | 29  | 2 | OAR2_63911376.1  | OAR2_66880170.1  | 2968.79 | 62  |
| S620 |       | 507 | 2 | OAR2_63911376.1  | OAR2_65914681.1  | 2003.31 | 43  |
| S620 |       | 49  | 2 | OAR2_61907594.1  | OAR2_74652390.1  | 12744.8 | 265 |
| S620 | CON   | 5   | 2 | OAR2_65431232.1  | OAR2_65914681.1  | 483.449 | 10  |
| S620 | UNION | 5   | 2 | OAR2_61907594.1  | OAR2_74652390.1  | 12744.8 | 265 |
| S621 |       | 152 | 2 | OAR2_52795503.1  | OAR2_54554938.1  | 1759.43 | 38  |
| S621 |       | 45  | 2 | OAR2_52795503.1  | OAR2_54554938.1  | 1759.43 | 38  |
| S621 |       | 507 | 2 | s37403.1         | s36747.1         | 4416.51 | 74  |
| S621 |       | 79  | 2 | OAR2_49013850.1  | s36747.1         | 5342.23 | 88  |
| S621 |       | 29  | 2 | s05611.1         | OAR2_55308142.1  | 7693.97 | 128 |
| S621 | CON   | 5   | 2 | OAR2_52795503.1  | s36747.1         | 1560.57 | 35  |
| S621 | UNION | 5   | 2 | s05611.1         | OAR2_55308142.1  | 7693.97 | 128 |
| S623 |       | 507 | 1 | s22571.1         | s56772.1         | 15398.3 | 291 |
| S623 |       | 702 | 1 | OAR1_282017475.1 | s67262.1         | 9551.48 | 171 |
| S623 |       | 45  | 1 | s00865.1         | OAR1_292547071.1 | 1801.06 | 41  |



|      |       |     |   |                  |                  |         |     |
|------|-------|-----|---|------------------|------------------|---------|-----|
| S623 |       | 844 | 1 | s30252.1         | s15782.1         | 2657.67 | 55  |
| S623 |       | 61  | 1 | OAR1_291297885.1 | s65284.1         | 7463.92 | 143 |
| S623 | CON   | 5   | 1 | OAR1_291297885.1 | s67262.1         | 271.067 | 7   |
| S623 | UNION | 5   | 1 | s22571.1         | s65284.1         | 17454.1 | 322 |
| S629 |       | 29  | 1 | OAR1_283569518.1 | s39199.1         | 5956.3  | 95  |
| S629 |       | 844 | 1 | OAR1_281552674.1 | s62624.1         | 2326.12 | 51  |
| S629 |       | 507 | 1 | s22571.1         | s56772.1         | 15398.3 | 291 |
| S629 |       | 90  | 1 | OAR1_280918505.1 | s59682.1         | 4159.05 | 86  |
| S629 |       | 702 | 1 | OAR1_282017475.1 | s67262.1         | 9551.48 | 171 |
| S629 | CON   | 5   | 1 | OAR1_283569518.1 | s62624.1         | 309.272 | 7   |
| S629 | UNION | 5   | 1 | OAR1_280918505.1 | s56772.1         | 15787.5 | 299 |
| S630 |       | 844 | 1 | OAR1_281552674.1 | s62624.1         | 2326.12 | 51  |
| S630 |       | 507 | 1 | s22571.1         | s56772.1         | 15398.3 | 291 |
| S630 |       | 90  | 1 | OAR1_280918505.1 | s59682.1         | 4159.05 | 86  |
| S630 |       | 29  | 1 | OAR1_280132963.1 | s44037.1         | 2616.65 | 54  |
| S630 |       | 702 | 1 | OAR1_282017475.1 | s67262.1         | 9551.48 | 171 |
| S630 | CON   | 5   | 1 | OAR1_282017475.1 | s44037.1         | 732.14  | 15  |
| S630 | UNION | 5   | 1 | OAR1_280132963.1 | s56772.1         | 16573   | 315 |
| S631 |       | 126 | 1 | OAR1_253349819.1 | s70277.1         | 12807   | 217 |
| S631 |       | 829 | 1 | OAR1_257557854.1 | s49280.1         | 5797.95 | 97  |
| S631 |       | 606 | 1 | OAR1_262265433.1 | OAR1_264697118.1 | 2431.68 | 44  |
| S631 |       | 152 | 1 | OAR1_262561308.1 | OAR1_266535457.1 | 3974.15 | 71  |
| S631 |       | 507 | 1 | s27023.1         | s70277.1         | 2887.16 | 50  |
| S631 | CON   | 5   | 1 | s27023.1         | s49280.1         | 86.116  | 3   |
| S631 | UNION | 5   | 1 | OAR1_253349819.1 | OAR1_266535457.1 | 13185.6 | 224 |
| S632 |       | 126 | 1 | s40188.1         | OAR1_241703558.1 | 8537.63 | 145 |
| S632 |       | 152 | 1 | OAR1_230994116.1 | OAR1_233249488.1 | 2255.37 | 43  |
| S632 |       | 40  | 1 | OAR1_230374318.1 | OAR1_234437646.1 | 4063.33 | 74  |
| S632 |       | 829 | 1 | OAR1_219136030.1 | OAR1_236103073.1 | 16967   | 322 |
| S632 |       | 702 | 1 | OAR1_228131256.1 | OAR1_233756581.1 | 5625.32 | 96  |
| S632 | CON   | 5   | 1 | s40188.1         | OAR1_233249488.1 | 83.56   | 2   |
| S632 | UNION | 5   | 1 | OAR1_219136030.1 | OAR1_241703558.1 | 22567.5 | 406 |
| S636 |       | 123 | 1 | OAR1_221370736.1 | OAR1_222987599.1 | 1616.86 | 31  |
| S636 |       | 829 | 1 | OAR1_219136030.1 | OAR1_236103073.1 | 16967   | 322 |
| S636 |       | 629 | 1 | OAR1_214417389.1 | OAR1_233116174.1 | 18698.8 | 341 |
| S636 |       | 702 | 1 | OAR1_201628760.1 | OAR1_224818104.1 | 23189.3 | 424 |
| S636 |       | 90  | 1 | OAR1_222537672.1 | OAR1_230460155.1 | 7922.48 | 157 |
| S636 | CON   | 5   | 1 | OAR1_222537672.1 | OAR1_222987599.1 | 449.927 | 10  |
| S636 | UNION | 5   | 1 | OAR1_201628760.1 | OAR1_236103073.1 | 34474.3 | 639 |
| S642 |       | 123 | 1 | OAR1_221370736.1 | OAR1_222987599.1 | 1616.86 | 31  |
| S642 |       | 829 | 1 | OAR1_219136030.1 | OAR1_236103073.1 | 16967   | 322 |
| S642 |       | 629 | 1 | OAR1_214417389.1 | OAR1_233116174.1 | 18698.8 | 341 |
| S642 |       | 702 | 1 | OAR1_201628760.1 | OAR1_224818104.1 | 23189.3 | 424 |
| S642 |       | 627 | 1 | s00549.1         | OAR1_221878496.1 | 2683.75 | 44  |
| S642 | CON   | 5   | 1 | OAR1_221370736.1 | OAR1_221878496.1 | 507.76  | 8   |
| S642 | UNION | 5   | 1 | OAR1_201628760.1 | OAR1_236103073.1 | 34474.3 | 639 |
| S643 |       | 829 | 1 | OAR1_219136030.1 | OAR1_236103073.1 | 16967   | 322 |
| S643 |       | 629 | 1 | OAR1_214417389.1 | OAR1_233116174.1 | 18698.8 | 341 |

|      |       |     |   |                    |                          |         |     |
|------|-------|-----|---|--------------------|--------------------------|---------|-----|
| S643 |       | 702 | 1 | OAR1_201628760.1   | OAR1_224818104.1         | 23189.3 | 424 |
| S643 |       | 126 | 1 | OAR1_217543314.1   | OAR1_219952416.1         | 2409.1  | 36  |
| S643 |       | 627 | 1 | s00549.1           | OAR1_221878496.1         | 2683.75 | 44  |
| S643 | CON   | 5   | 1 | s00549.1           | OAR1_219952416.1         | 757.672 | 15  |
| S643 | UNION | 5   | 1 | OAR1_201628760.1   | OAR1_236103073.1         | 34474.3 | 639 |
| S644 |       | 829 | 1 | s66109.1           | s65811.1                 | 2617.61 | 35  |
| S644 |       | 123 | 1 | s30590.1           | OAR1_201878358.1         | 3641.45 | 75  |
| S644 |       | 801 | 1 | OAR1_198827329.1   | s56333.1                 | 6897.16 | 121 |
| S644 |       | 157 | 1 | DU287626_225.1 250 | 506CS3900283200001_442.1 | 2218.24 | 32  |
| S644 |       | 702 | 1 | OAR1_201628760.1   | OAR1_224818104.1         | 23189.3 | 424 |
| S644 | CON   | 5   | 1 | s66109.1           | OAR1_201878358.1         | 59.136  | 3   |
| S644 | UNION | 5   | 1 | s30590.1           | OAR1_224818104.1         | 26581.2 | 493 |
| S651 |       | 606 | 1 | s12579.1           | OAR1_193526104.1         | 9327.73 | 173 |
| S651 |       | 627 | 1 | s12579.1           | OAR1_190617487.1         | 6419.11 | 121 |
| S651 |       | 629 | 1 | s12579.1           | OAR1_190617487.1         | 6419.11 | 121 |
| S651 |       | 157 | 1 | OAR1_185953850.1   | s57353.1                 | 2652.55 | 54  |
| S651 |       | 45  | 1 | s00576.1           | s17408.1                 | 6283.1  | 119 |
| S651 | CON   | 5   | 1 | OAR1_185953850.1   | s57353.1                 | 2652.55 | 54  |
| S651 | UNION | 5   | 1 | s00576.1           | OAR1_193526104.1         | 9394.42 | 175 |
| S652 |       | 606 | 1 | s12579.1           | OAR1_193526104.1         | 9327.73 | 173 |
| S652 |       | 627 | 1 | s12579.1           | OAR1_190617487.1         | 6419.11 | 121 |
| S652 |       | 629 | 1 | s12579.1           | OAR1_190617487.1         | 6419.11 | 121 |
| S652 |       | 79  | 1 | OAR1_182020254.1   | OAR1_185615587.1         | 3595.33 | 73  |
| S652 |       | 45  | 1 | s00576.1           | s17408.1                 | 6283.1  | 119 |
| S652 | CON   | 5   | 1 | s12579.1           | OAR1_185615587.1         | 1417.21 | 28  |
| S652 | UNION | 5   | 1 | OAR1_182020254.1   | OAR1_193526104.1         | 11505.9 | 218 |
| S654 |       | 79  | 1 | OAR1_149565545.1   | OAR1_151312088.1         | 1746.54 | 42  |
| S654 |       | 61  | 1 | OAR1_148262943.1   | OAR1_151312088.1         | 3049.14 | 67  |
| S654 |       | 123 | 1 | s53597.1           | OAR1_153662211.1         | 35798.6 | 631 |
| S654 |       | 702 | 1 | s14189.1           | s40751.1                 | 42088.8 | 712 |
| S654 |       | 90  | 1 | OAR1_148901159.1   | OAR1_151247138.1         | 2345.98 | 54  |
| S654 | CON   | 5   | 1 | OAR1_149565545.1   | s40751.1                 | 247.384 | 7   |
| S654 | UNION | 5   | 1 | s14189.1           | OAR1_153662211.1         | 45938.1 | 791 |
| S655 |       | 702 | 1 | s14189.1           | s40751.1                 | 42088.8 | 712 |
| S655 |       | 123 | 1 | s53597.1           | OAR1_153662211.1         | 35798.6 | 631 |
| S655 |       | 829 | 1 | OAR1_145497863.1   | OAR1_149463910.1         | 3966.05 | 64  |
| S655 |       | 61  | 1 | OAR1_148262943.1   | OAR1_151312088.1         | 3049.14 | 67  |
| S655 |       | 90  | 1 | OAR1_148901159.1   | OAR1_151247138.1         | 2345.98 | 54  |
| S655 | CON   | 5   | 1 | OAR1_148901159.1   | OAR1_149463910.1         | 562.751 | 14  |
| S655 | UNION | 5   | 1 | s14189.1           | OAR1_153662211.1         | 45938.1 | 791 |
| S658 |       | 61  | 1 | OAR1_148262943.1   | OAR1_151312088.1         | 3049.14 | 67  |
| S658 |       | 79  | 1 | OAR1_143829113.1   | OAR1_148557968.1         | 4728.85 | 72  |
| S658 |       | 123 | 1 | s53597.1           | OAR1_153662211.1         | 35798.6 | 631 |
| S658 |       | 702 | 1 | s14189.1           | s40751.1                 | 42088.8 | 712 |
| S658 |       | 829 | 1 | OAR1_145497863.1   | OAR1_149463910.1         | 3966.05 | 64  |
| S658 | CON   | 5   | 1 | OAR1_148262943.1   | OAR1_148557968.1         | 295.025 | 5   |
| S658 | UNION | 5   | 1 | s14189.1           | OAR1_153662211.1         | 45938.1 | 791 |
| S659 |       | 79  | 1 | OAR1_143829113.1   | OAR1_148557968.1         | 4728.85 | 72  |

|      |       |     |    |                   |                  |         |     |
|------|-------|-----|----|-------------------|------------------|---------|-----|
| S659 |       | 123 | 1  | s53597.1          | OAR1_153662211.1 | 35798.6 | 631 |
| S659 |       | 702 | 1  | s14189.1          | s40751.1         | 42088.8 | 712 |
| S659 |       | 606 | 1  | DU354639_611.1    | OAR1_145810797.1 | 6263.2  | 106 |
| S659 |       | 829 | 1  | OAR1_145497863.1  | OAR1_149463910.1 | 3966.05 | 64  |
| S659 | CON   | 5   | 1  | OAR1_145497863.1  | OAR1_145810797.1 | 312.934 | 5   |
| S659 | UNION | 5   | 1  | s14189.1          | OAR1_153662211.1 | 45938.1 | 791 |
| S660 |       | 606 | 1  | DU354639_611.1    | OAR1_145810797.1 | 6263.2  | 106 |
| S660 |       | 27  | 1  | s63741.1          | OAR1_143333465.1 | 4008.69 | 70  |
| S660 |       | 627 | 1  | s03118.1          | OAR1_141731333.1 | 16512   | 283 |
| S660 |       | 702 | 1  | s14189.1          | s40751.1         | 42088.8 | 712 |
| S660 |       | 123 | 1  | s53597.1          | OAR1_153662211.1 | 35798.6 | 631 |
| S660 | CON   | 5   | 1  | DU354639_611.1    | OAR1_141731333.1 | 2183.74 | 37  |
| S660 | UNION | 5   | 1  | s14189.1          | OAR1_153662211.1 | 45938.1 | 791 |
| S661 |       | 45  | 1  | s37607.1          | s04671.1         | 16346.9 | 247 |
| S661 |       | 49  | 1  | OAR1_113402761.1  | s75030.1         | 4288.36 | 49  |
| S661 |       | 702 | 1  | s14189.1          | s40751.1         | 42088.8 | 712 |
| S661 |       | 801 | 1  | OAR1_110989185.1  | s10939.1         | 7522.21 | 114 |
| S661 |       | 556 | 1  | OAR1_112929344.1  | OAR1_117762259.1 | 4832.91 | 61  |
| S661 | CON   | 5   | 1  | s37607.1          | s75030.1         | 2661.79 | 32  |
| S661 | UNION | 5   | 1  | s14189.1          | s40751.1         | 42088.8 | 712 |
| S667 |       | 616 | 1  | s16707.1          | OAR1_74015424.1  | 3018.78 | 60  |
| S667 |       | 507 | 1  | OAR1_67421568.1   | OAR1_71254279.1  | 3832.71 | 57  |
| S667 |       | 702 | 1  | OAR1_65265541_X.1 | OAR1_73281352.1  | 8015.81 | 136 |
| S667 |       | 90  | 1  | OAR1_66156513.1   | OAR1_74623022.1  | 8466.51 | 147 |
| S667 |       | 61  | 1  | s58781.1          | s29884.1         | 9573.23 | 170 |
| S667 | CON   | 5   | 1  | s16707.1          | OAR1_71254279.1  | 257.632 | 6   |
| S667 | UNION | 5   | 1  | OAR1_65265541_X.1 | s29884.1         | 12598.8 | 227 |
| S668 |       | 606 | 1  | OAR1_44090814.1   | OAR1_51307088.1  | 7216.27 | 123 |
| S668 |       | 45  | 1  | OAR1_44090814.1   | OAR1_47087569.1  | 2996.76 | 55  |
| S668 |       | 507 | 1  | OAR1_43083702.1   | s14904.1         | 5678.21 | 99  |
| S668 |       | 702 | 1  | OAR1_7717464.1    | OAR1_58938560.1  | 51221.1 | 934 |
| S668 |       | 844 | 1  | OAR1_44241542.1   | OAR1_49456350.1  | 5214.81 | 94  |
| S668 | CON   | 5   | 1  | OAR1_44241542.1   | OAR1_47087569.1  | 2846.03 | 52  |
| S668 | UNION | 5   | 1  | OAR1_7717464.1    | OAR1_58938560.1  | 51221.1 | 934 |
| S669 |       | 90  | 1  | OAR1_16750809.1   | OAR1_19152280.1  | 2401.47 | 43  |
| S669 |       | 79  | 1  | s73231.1          | OAR1_16795469.1  | 3934.26 | 80  |
| S669 |       | 606 | 1  | OAR1_15578534.1   | s69885.1         | 12559.2 | 218 |
| S669 |       | 702 | 1  | OAR1_7717464.1    | OAR1_58938560.1  | 51221.1 | 934 |
| S669 |       | 627 | 1  | OAR1_15256499.1   | OAR1_18052854.1  | 2796.36 | 53  |
| S669 | CON   | 5   | 1  | OAR1_16750809.1   | OAR1_16795469.1  | 44.66   | 3   |
| S669 | UNION | 5   | 1  | OAR1_7717464.1    | OAR1_58938560.1  | 51221.1 | 934 |
| S672 |       | 606 | 26 | OAR26_42480765.1  | OAR26_44441243.1 | 1960.48 | 34  |
| S672 |       | 627 | 26 | s72956.1          | OAR26_44089889.1 | 1679.27 | 32  |
| S672 |       | 45  | 26 | s70488.1          | OAR26_42514266.1 | 6953.15 | 122 |
| S672 |       | 61  | 26 | s63463.1          | OAR26_46995252.1 | 7812.86 | 140 |
| S672 | CON   | 4   | 26 | OAR26_42480765.1  | OAR26_42514266.1 | 33.501  | 2   |
| S672 | UNION | 4   | 26 | s70488.1          | OAR26_46995252.1 | 11434.1 | 195 |
| S673 |       | 27  | 26 | OAR26_19029894.1  | s08067.1         | 9710.75 | 157 |

|      |       |     |    |                  |                  |         |     |
|------|-------|-----|----|------------------|------------------|---------|-----|
| S673 |       | 29  | 26 | OAR26_19029894.1 | OAR26_25594436.1 | 6564.54 | 94  |
| S673 |       | 606 | 26 | OAR26_16835791.1 | OAR26_25248695.1 | 8412.9  | 137 |
| S673 |       | 152 | 26 | s66187.1         | OAR26_20847538.1 | 4834.37 | 90  |
| S673 | CON   | 4   | 26 | OAR26_19029894.1 | OAR26_20847538.1 | 1817.64 | 29  |
| S673 | UNION | 4   | 26 | s66187.1         | s08067.1         | 12727.5 | 218 |
| S674 |       | 829 | 26 | OAR26_8625199.1  | OAR26_10403629.1 | 1778.43 | 34  |
| S674 |       | 90  | 26 | OAR26_6073159.1  | OAR26_10130406.1 | 4057.25 | 46  |
| S674 |       | 844 | 26 | OAR26_8709366.1  | OAR26_10981172.1 | 2271.81 | 41  |
| S674 |       | 126 | 26 | OAR26_8625199.1  | OAR26_13494685.1 | 4869.49 | 83  |
| S674 | CON   | 4   | 26 | OAR26_8709366.1  | OAR26_10130406.1 | 1421.04 | 29  |
| S674 | UNION | 4   | 26 | OAR26_6073159.1  | OAR26_13494685.1 | 7421.53 | 99  |
| S679 |       | 629 | 25 | s32866.1         | OAR25_31259191.1 | 2423.01 | 48  |
| S679 |       | 126 | 25 | OAR25_24120855.1 | OAR25_29970035.1 | 5849.18 | 104 |
| S679 |       | 507 | 25 | s10320.1         | s12031.1         | 20755.8 | 401 |
| S679 |       | 45  | 25 | OAR25_24491716.1 | OAR25_29853310.1 | 5361.59 | 95  |
| S679 | CON   | 4   | 25 | s32866.1         | s12031.1         | 536.013 | 15  |
| S679 | UNION | 4   | 25 | s10320.1         | OAR25_31259191.1 | 22642.8 | 434 |
| S680 |       | 507 | 25 | s10320.1         | s12031.1         | 20755.8 | 401 |
| S680 |       | 844 | 25 | OAR25_19516269.1 | OAR25_25861480.1 | 6345.21 | 122 |
| S680 |       | 126 | 25 | OAR25_24120855.1 | OAR25_29970035.1 | 5849.18 | 104 |
| S680 |       | 45  | 25 | OAR25_24491716.1 | OAR25_29853310.1 | 5361.59 | 95  |
| S680 | CON   | 4   | 25 | OAR25_24491716.1 | OAR25_25861480.1 | 1369.76 | 26  |
| S680 | UNION | 4   | 25 | s10320.1         | OAR25_29970035.1 | 21353.7 | 409 |
| S681 |       | 507 | 25 | s10320.1         | s12031.1         | 20755.8 | 401 |
| S681 |       | 61  | 25 | OAR25_12492866.1 | OAR25_21044148.1 | 8551.28 | 175 |
| S681 |       | 616 | 25 | OAR25_14447424.1 | OAR25_15709970.1 | 1262.55 | 30  |
| S681 |       | 152 | 25 | OAR25_15029968.1 | OAR25_16672918.1 | 1642.95 | 34  |
| S681 | CON   | 4   | 25 | OAR25_15029968.1 | OAR25_15709970.1 | 680.002 | 16  |
| S681 | UNION | 4   | 25 | s10320.1         | s12031.1         | 20755.8 | 401 |
| S682 |       | 90  | 25 | OAR25_10160789.1 | s21640.1         | 3276.28 | 60  |
| S682 |       | 844 | 25 | OAR25_9879901.1  | OAR25_11438585.1 | 1558.68 | 31  |
| S682 |       | 507 | 25 | s10320.1         | s12031.1         | 20755.8 | 401 |
| S682 |       | 152 | 25 | OAR25_10480244.1 | OAR25_14279951.1 | 3799.71 | 71  |
| S682 | CON   | 4   | 25 | OAR25_10480244.1 | OAR25_11438585.1 | 958.341 | 19  |
| S682 | UNION | 4   | 25 | s10320.1         | s12031.1         | 20755.8 | 401 |
| S683 |       | 79  | 25 | s21107.1         | s10114.1         | 2215.18 | 43  |
| S683 |       | 627 | 25 | s52797.1         | s09722.1         | 2190.12 | 43  |
| S683 |       | 49  | 25 | OAR25_5894736.1  | OAR25_7752816.1  | 1858.08 | 35  |
| S683 |       | 45  | 25 | s58408.1         | s21107.1         | 1832.56 | 31  |
| S683 | CON   | 4   | 25 | s21107.1         | s21107.1         | 0       | 1   |
| S683 | UNION | 4   | 25 | s58408.1         | s10114.1         | 4047.74 | 73  |
| S688 |       | 844 | 25 | s42361.1         | s39664.1         | 1600.34 | 35  |
| S688 |       | 61  | 25 | s42361.1         | s41841.1         | 1784.14 | 38  |
| S688 |       | 29  | 25 | s42361.1         | OAR25_2252731.1  | 2252.73 | 47  |
| S688 |       | 90  | 25 | s12866.1         | s21472.1         | 4810.44 | 79  |
| S688 | CON   | 4   | 25 | s12866.1         | s39664.1         | 1600.34 | 34  |
| S688 | UNION | 4   | 25 | s42361.1         | s21472.1         | 4810.44 | 80  |

|      |       |     |    |                  |                    |         |     |
|------|-------|-----|----|------------------|--------------------|---------|-----|
| S694 |       | 126 | 24 | s31084.1         | OAR24_7741373.1    | 1842.11 | 35  |
| S694 |       | 157 | 24 | s68231.1         | DU281388_299.1     | 1742.96 | 30  |
| S694 |       | 844 | 24 | s53625.1         | s04817.1           | 6789.77 | 105 |
| S694 |       | 702 | 24 | s35472.1         | OAR24_22201078.1   | 16855.5 | 259 |
| S694 | CON   | 4   | 24 | s31084.1         | DU281388_299.1     | 347.164 | 6   |
| S694 | UNION | 4   | 24 | s53625.1         | OAR24_22201078.1   | 21083.7 | 319 |
|      |       |     |    |                  |                    |         |     |
| S698 |       | 29  | 24 | s69582.1         | OAR24_4058568.1    | 4058.57 | 50  |
| S698 |       | 140 | 24 | s41842.1         | OAR24_4058568.1    | 4058.57 | 51  |
| S698 |       | 61  | 24 | s45142.1         | s74400.1           | 3026.07 | 36  |
| S698 |       | 844 | 24 | s53625.1         | s04817.1           | 6789.77 | 105 |
| S698 | CON   | 4   | 24 | s53625.1         | s74400.1           | 1908.73 | 23  |
| S698 | UNION | 4   | 24 | s45142.1         | s04817.1           | 7907.1  | 118 |
|      |       |     |    |                  |                    |         |     |
| S703 |       | 27  | 23 | s58136.1         | OAR23_60124720.1   | 9675.72 | 139 |
| S703 |       | 29  | 23 | s58136.1         | OAR23_60124720.1   | 9675.72 | 139 |
| S703 |       | 123 | 23 | OAR23_55806264.1 | OAR23_59401394.1   | 3595.13 | 53  |
| S703 |       | 844 | 23 | s17206.1         | OAR23_60961233.1   | 2559.8  | 38  |
| S703 | CON   | 4   | 23 | s17206.1         | OAR23_59401394.1   | 999.966 | 14  |
| S703 | UNION | 4   | 23 | s58136.1         | OAR23_60961233.1   | 10512.2 | 153 |
|      |       |     |    |                  |                    |         |     |
| S704 |       | 61  | 23 | s40890.1         | s23488.1           | 2039.45 | 34  |
| S704 |       | 45  | 23 | OAR23_32717464.1 | s03900.1           | 8953.01 | 139 |
| S704 |       | 702 | 23 | OAR23_32970524.1 | s47536.1           | 10557   | 158 |
| S704 |       | 140 | 23 | OAR23_33045102.1 | s30665.1           | 2503.87 | 39  |
| S704 | CON   | 4   | 23 | OAR23_33045102.1 | s23488.1           | 871.498 | 14  |
| S704 | UNION | 4   | 23 | s40890.1         | s47536.1           | 11650.4 | 176 |
|      |       |     |    |                  |                    |         |     |
| S712 |       | 702 | 23 | OAR23_32970524.1 | s47536.1           | 10557   | 158 |
| S712 |       | 140 | 23 | OAR23_30906493.1 | OAR23_32970524.1   | 2064.03 | 32  |
| S712 |       | 61  | 23 | s40890.1         | s23488.1           | 2039.45 | 34  |
| S712 |       | 45  | 23 | OAR23_32717464.1 | s03900.1           | 8953.01 | 139 |
| S712 | CON   | 4   | 23 | OAR23_32970524.1 | OAR23_32970524.1   | 0       | 1   |
| S712 | UNION | 4   | 23 | OAR23_30906493.1 | s47536.1           | 12621.1 | 189 |
|      |       |     |    |                  |                    |         |     |
| S713 |       | 45  | 23 | OAR23_32717464.1 | s03900.1           | 8953.01 | 139 |
| S713 |       | 616 | 23 | OAR23_30686953.1 | OAR23_32932392_X.1 | 2245.44 | 33  |
| S713 |       | 140 | 23 | OAR23_30906493.1 | OAR23_32970524.1   | 2064.03 | 32  |
| S713 |       | 61  | 23 | s40890.1         | s23488.1           | 2039.45 | 34  |
| S713 | CON   | 4   | 23 | OAR23_32717464.1 | OAR23_32932392_X.1 | 214.929 | 5   |
| S713 | UNION | 4   | 23 | OAR23_30686953.1 | s03900.1           | 10983.5 | 167 |
|      |       |     |    |                  |                    |         |     |
| S715 |       | 844 | 22 | s75260.1         | s49093.1           | 2055.87 | 43  |
| S715 |       | 507 | 22 | s29080.1         | OAR22_49444571.1   | 3407.59 | 66  |
| S715 |       | 61  | 22 | s24975.1         | OAR22_48881341.1   | 1818.67 | 34  |
| S715 |       | 556 | 22 | s41217.1         | OAR22_49529205.1   | 1894.93 | 40  |
| S715 | CON   | 4   | 22 | s41217.1         | OAR22_48881341.1   | 1247.07 | 24  |
| S715 | UNION | 4   | 22 | s29080.1         | OAR22_49529205.1   | 3492.22 | 68  |
|      |       |     |    |                  |                    |         |     |
| S716 |       | 507 | 22 | s06758.1         | OAR22_42355166.1   | 24436.4 | 466 |
| S716 |       | 40  | 22 | OAR22_39226599.1 | s63122.1           | 3096.53 | 64  |
| S716 |       | 140 | 22 | OAR22_39672861.1 | s60513.1           | 2063.93 | 43  |
| S716 |       | 61  | 22 | s13679.1         | OAR22_41976427.1   | 1582.02 | 36  |
| S716 | CON   | 4   | 22 | s13679.1         | s60513.1           | 1342.38 | 31  |
| S716 | UNION | 4   | 22 | s06758.1         | OAR22_42355166.1   | 24436.4 | 466 |

|      |       |     |    |                    |                  |         |     |
|------|-------|-----|----|--------------------|------------------|---------|-----|
| S719 |       | 49  | 21 | s74518.1           | s38134.1         | 13941.9 | 212 |
| S719 |       | 606 | 21 | OAR21_21865772.1   | OAR21_36571389.1 | 14705.6 | 232 |
| S719 |       | 844 | 21 | OAR21_23862060.1   | s47821.1         | 8308.09 | 126 |
| S719 |       | 152 | 21 | OAR21_25759271.1   | OAR21_27500331.1 | 1741.06 | 31  |
| S719 | CON   | 4   | 21 | OAR21_25759271.1   | OAR21_27500331.1 | 1741.06 | 31  |
| S719 | UNION | 4   | 21 | s74518.1           | OAR21_36571389.1 | 17643.3 | 276 |
| S722 |       | 45  | 21 | OAR21_19280450.1   | OAR21_24102988.1 | 4822.54 | 78  |
| S722 |       | 49  | 21 | s74518.1           | s38134.1         | 13941.9 | 212 |
| S722 |       | 801 | 21 | OAR21_17659120.1   | s64572.1         | 2030.63 | 35  |
| S722 |       | 79  | 21 | OAR21_16500504.1   | OAR21_24084777.1 | 7584.27 | 125 |
| S722 | CON   | 4   | 21 | OAR21_19280450.1   | s64572.1         | 409.299 | 4   |
| S722 | UNION | 4   | 21 | OAR21_16500504.1   | s38134.1         | 16369.5 | 255 |
| S723 |       | 616 | 21 | s07207.1           | OAR21_11371256.1 | 2929.72 | 51  |
| S723 |       | 27  | 21 | OAR21_6702302.1    | s41655.1         | 5418.27 | 94  |
| S723 |       | 702 | 21 | s74845.1           | OAR21_17189778.1 | 17189.8 | 241 |
| S723 |       | 123 | 21 | OAR21_7901164.1    | OAR21_11513066.1 | 3611.9  | 63  |
| S723 | CON   | 4   | 21 | s07207.1           | OAR21_11371256.1 | 2929.72 | 51  |
| S723 | UNION | 4   | 21 | s74845.1           | OAR21_17189778.1 | 17189.8 | 241 |
| S724 |       | 29  | 20 | OAR20_45542235.1   | s37556.1         | 1477.59 | 36  |
| S724 |       | 606 | 20 | s40462.1           | s37556.1         | 1520.29 | 37  |
| S724 |       | 844 | 20 | OAR20_42071000_X.1 | s25696.1         | 3826.95 | 84  |
| S724 |       | 61  | 20 | s64834.1           | s49617.1         | 1868.62 | 41  |
| S724 | CON   | 4   | 20 | OAR20_45542235.1   | s25696.1         | 355.715 | 8   |
| S724 | UNION | 4   | 20 | OAR20_42071000_X.1 | s37556.1         | 4948.82 | 112 |
| S727 |       | 27  | 20 | OAR20_42482053.1   | s54536.1         | 2596.59 | 58  |
| S727 |       | 844 | 20 | OAR20_42071000_X.1 | s25696.1         | 3826.95 | 84  |
| S727 |       | 616 | 20 | s09155.1           | s64274.1         | 2115.44 | 47  |
| S727 |       | 61  | 20 | s64834.1           | s49617.1         | 1868.62 | 41  |
| S727 | CON   | 4   | 20 | s64834.1           | s64274.1         | 779.162 | 18  |
| S727 | UNION | 4   | 20 | OAR20_42071000_X.1 | s49617.1         | 3991.17 | 88  |
| S728 |       | 61  | 20 | s28948.1           | OAR20_35185147.1 | 4569.52 | 68  |
| S728 |       | 27  | 20 | s28948.1           | OAR20_34756048.1 | 4140.42 | 61  |
| S728 |       | 45  | 20 | s72198.1           | OAR20_34436224.1 | 7964.15 | 94  |
| S728 |       | 140 | 20 | OAR20_26794433.1   | OAR20_33616292.1 | 6821.86 | 77  |
| S728 | CON   | 4   | 20 | s28948.1           | OAR20_33616292.1 | 3000.66 | 41  |
| S728 | UNION | 4   | 20 | s72198.1           | OAR20_35185147.1 | 8713.08 | 109 |
| S729 |       | 627 | 20 | s44306.1           | s06051.1         | 3639.25 | 77  |
| S729 |       | 140 | 20 | s16031.1           | s12267.1         | 1880.87 | 40  |
| S729 |       | 27  | 20 | s58254.1           | s12267.1         | 2049.4  | 44  |
| S729 |       | 29  | 20 | s38719.1           | OAR20_17775022.1 | 4200.7  | 84  |
| S729 | CON   | 4   | 20 | s44306.1           | s12267.1         | 852.561 | 21  |
| S729 | UNION | 4   | 20 | s38719.1           | s06051.1         | 6250.08 | 128 |
| S735 |       | 27  | 20 | OAR20_11442511.1   | s59954.1         | 2223.77 | 40  |
| S735 |       | 29  | 20 | OAR20_10918132_X.1 | s54709.1         | 2576.65 | 50  |
| S735 |       | 702 | 20 | OAR20_27119.1      | OAR20_14072832.1 | 14045.7 | 264 |
| S735 |       | 90  | 20 | s34560.1           | s74774.1         | 5360.26 | 107 |
| S735 | CON   | 4   | 20 | OAR20_11442511.1   | s74774.1         | 1915.04 | 36  |

|      |       |     |    |                  |                  |         |     |
|------|-------|-----|----|------------------|------------------|---------|-----|
| S735 | UNION | 4   | 20 | OAR20_27119.1    | OAR20_14072832.1 | 14045.7 | 264 |
| S736 |       | 61  | 19 | s68645.1         | s10765.1         | 3926.28 | 59  |
| S736 |       | 829 | 19 | s63765.1         | s58019.1         | 1368.46 | 30  |
| S736 |       | 123 | 19 | s06628.1         | s48005.1         | 14962.5 | 245 |
| S736 |       | 616 | 19 | OAR19_49208953.1 | s75263.1         | 1971.38 | 34  |
| S736 | CON   | 4   | 19 | OAR19_49208953.1 | s58019.1         | 62.386  | 2   |
| S736 | UNION | 4   | 19 | s06628.1         | s48005.1         | 14962.5 | 245 |
| S737 |       | 61  | 19 | s68645.1         | s10765.1         | 3926.28 | 59  |
| S737 |       | 829 | 19 | s63765.1         | s58019.1         | 1368.46 | 30  |
| S737 |       | 29  | 19 | OAR19_45775486.1 | s68645.1         | 3399.83 | 67  |
| S737 |       | 123 | 19 | s06628.1         | s48005.1         | 14962.5 | 245 |
| S737 | CON   | 4   | 19 | s68645.1         | s68645.1         | 0       | 1   |
| S737 | UNION | 4   | 19 | s06628.1         | s48005.1         | 14962.5 | 245 |
| S741 |       | 702 | 19 | OAR19_41101734.1 | OAR19_48025918.1 | 6924.18 | 121 |
| S741 |       | 123 | 19 | s06628.1         | s48005.1         | 14962.5 | 245 |
| S741 |       | 29  | 19 | OAR19_45775486.1 | s68645.1         | 3399.83 | 67  |
| S741 |       | 829 | 19 | s63765.1         | s58019.1         | 1368.46 | 30  |
| S741 | CON   | 4   | 19 | s63765.1         | OAR19_48025918.1 | 123.044 | 4   |
| S741 | UNION | 4   | 19 | OAR19_41101734.1 | s48005.1         | 15700.5 | 260 |
| S742 |       | 702 | 19 | OAR19_41101734.1 | OAR19_48025918.1 | 6924.18 | 121 |
| S742 |       | 123 | 19 | s06628.1         | s48005.1         | 14962.5 | 245 |
| S742 |       | 152 | 19 | OAR19_42964158.1 | OAR19_46545362.1 | 3581.2  | 57  |
| S742 |       | 29  | 19 | OAR19_45775486.1 | s68645.1         | 3399.83 | 67  |
| S742 | CON   | 4   | 19 | OAR19_45775486.1 | OAR19_46545362.1 | 769.876 | 13  |
| S742 | UNION | 4   | 19 | OAR19_41101734.1 | s48005.1         | 15700.5 | 260 |
| S756 |       | 123 | 19 | s06628.1         | s48005.1         | 14962.5 | 245 |
| S756 |       | 61  | 19 | s43852.1         | OAR19_43892533.1 | 2709.91 | 48  |
| S756 |       | 702 | 19 | OAR19_41101734.1 | OAR19_48025918.1 | 6924.18 | 121 |
| S756 |       | 152 | 19 | OAR19_42964158.1 | OAR19_46545362.1 | 3581.2  | 57  |
| S756 | CON   | 4   | 19 | OAR19_42964158.1 | OAR19_43892533.1 | 928.375 | 16  |
| S756 | UNION | 4   | 19 | OAR19_41101734.1 | s48005.1         | 15700.5 | 260 |
| S759 |       | 507 | 19 | s25457.1         | OAR19_41558943.1 | 6509.38 | 133 |
| S759 |       | 90  | 19 | OAR19_39869628.1 | OAR19_41692151.1 | 1822.52 | 41  |
| S759 |       | 702 | 19 | OAR19_41101734.1 | OAR19_48025918.1 | 6924.18 | 121 |
| S759 |       | 61  | 19 | s43852.1         | OAR19_43892533.1 | 2709.91 | 48  |
| S759 | CON   | 4   | 19 | s43852.1         | OAR19_41558943.1 | 376.319 | 10  |
| S759 | UNION | 4   | 19 | s25457.1         | OAR19_48025918.1 | 12976.4 | 242 |
| S760 |       | 152 | 19 | s09913.1         | OAR19_37223995.1 | 2230.49 | 46  |
| S760 |       | 844 | 19 | OAR19_32284446.1 | OAR19_37764352.1 | 5479.91 | 109 |
| S760 |       | 27  | 19 | OAR19_34533438.1 | OAR19_36976172.1 | 2442.73 | 46  |
| S760 |       | 507 | 19 | s25457.1         | OAR19_41558943.1 | 6509.38 | 133 |
| S760 | CON   | 4   | 19 | s25457.1         | OAR19_36976172.1 | 1926.61 | 38  |
| S760 | UNION | 4   | 19 | OAR19_32284446.1 | OAR19_41558943.1 | 9274.5  | 184 |
| S761 |       | 27  | 19 | OAR19_20140394.1 | OAR19_23298665.1 | 3158.27 | 60  |
| S761 |       | 29  | 19 | OAR19_19784946.1 | s01850.1         | 3302.34 | 63  |
| S761 |       | 702 | 19 | OAR19_7253713.1  | s27711.1         | 16961.5 | 313 |
| S761 |       | 49  | 19 | OAR19_21684191.1 | s55682.1         | 9977.43 | 163 |

|      |       |     |    |                  |                  |         |     |
|------|-------|-----|----|------------------|------------------|---------|-----|
| S761 | CON   | 4   | 19 | OAR19_21684191.1 | s01850.1         | 1403.09 | 23  |
| S761 | UNION | 4   | 19 | OAR19_7253713.1  | s55682.1         | 24407.9 | 439 |
| S762 |       | 27  | 19 | OAR19_20140394.1 | OAR19_23298665.1 | 3158.27 | 60  |
| S762 |       | 29  | 19 | OAR19_19784946.1 | s01850.1         | 3302.34 | 63  |
| S762 |       | 702 | 19 | OAR19_7253713.1  | s27711.1         | 16961.5 | 313 |
| S762 |       | 79  | 19 | OAR19_19497555.1 | OAR19_21580517.1 | 2082.96 | 43  |
| S762 | CON   | 4   | 19 | OAR19_20140394.1 | OAR19_21580517.1 | 1440.12 | 30  |
| S762 | UNION | 4   | 19 | OAR19_7253713.1  | s27711.1         | 16961.5 | 313 |
| S763 |       | 126 | 19 | OAR19_7959420.1  | OAR19_9490656.1  | 1531.24 | 34  |
| S763 |       | 79  | 19 | OAR19_6316471.1  | s23781.1         | 2364.11 | 40  |
| S763 |       | 45  | 19 | OAR19_3773707.1  | OAR19_13260250.1 | 9486.54 | 172 |
| S763 |       | 702 | 19 | OAR19_7253713.1  | s27711.1         | 16961.5 | 313 |
| S763 | CON   | 4   | 19 | OAR19_7959420.1  | s23781.1         | 721.16  | 13  |
| S763 | UNION | 4   | 19 | OAR19_3773707.1  | s27711.1         | 20441.5 | 368 |
| S764 |       | 140 | 18 | OAR18_54263457.1 | OAR18_57166462.1 | 2903.01 | 35  |
| S764 |       | 507 | 18 | OAR18_52361774.1 | OAR18_56351698.1 | 3989.92 | 47  |
| S764 |       | 152 | 18 | OAR18_51594268.1 | OAR18_55121773.1 | 3527.51 | 53  |
| S764 |       | 606 | 18 | OAR18_52219091.1 | s59424.1         | 5545.32 | 70  |
| S764 | CON   | 4   | 18 | OAR18_54263457.1 | OAR18_55121773.1 | 858.316 | 14  |
| S764 | UNION | 4   | 18 | OAR18_51594268.1 | s59424.1         | 6170.15 | 84  |
| S767 |       | 40  | 17 | s25119.1         | OAR17_52473999.1 | 2202.59 | 36  |
| S767 |       | 79  | 17 | OAR17_44276820.1 | OAR17_50838067.1 | 6561.25 | 100 |
| S767 |       | 702 | 17 | OAR17_36966397.1 | OAR17_74039265.1 | 37072.9 | 600 |
| S767 |       | 507 | 17 | s47176.1         | s49020.1         | 26754.9 | 433 |
| S767 | CON   | 4   | 17 | s25119.1         | OAR17_50838067.1 | 566.657 | 11  |
| S767 | UNION | 4   | 17 | OAR17_36966397.1 | OAR17_74039265.1 | 37072.9 | 600 |
| S770 |       | 702 | 17 | OAR17_36966397.1 | OAR17_74039265.1 | 37072.9 | 600 |
| S770 |       | 40  | 17 | OAR17_38599721.1 | OAR17_42515780.1 | 3916.06 | 64  |
| S770 |       | 507 | 17 | OAR17_40830954.1 | OAR17_43503660.1 | 2672.71 | 51  |
| S770 |       | 140 | 17 | s32577.1         | s24812.1         | 4527.89 | 80  |
| S770 | CON   | 4   | 17 | s32577.1         | OAR17_42515780.1 | 261.423 | 8   |
| S770 | UNION | 4   | 17 | OAR17_36966397.1 | OAR17_74039265.1 | 37072.9 | 600 |
| S771 |       | 507 | 17 | OAR17_40830954.1 | OAR17_43503660.1 | 2672.71 | 51  |
| S771 |       | 844 | 17 | OAR17_39208742.1 | s35423.1         | 1819.5  | 31  |
| S771 |       | 702 | 17 | OAR17_36966397.1 | OAR17_74039265.1 | 37072.9 | 600 |
| S771 |       | 40  | 17 | OAR17_38599721.1 | OAR17_42515780.1 | 3916.06 | 64  |
| S771 | CON   | 4   | 17 | OAR17_40830954.1 | s35423.1         | 197.291 | 5   |
| S771 | UNION | 4   | 17 | OAR17_36966397.1 | OAR17_74039265.1 | 37072.9 | 600 |
| S772 |       | 29  | 16 | OAR16_19414529.1 | OAR16_21237906.1 | 1823.38 | 32  |
| S772 |       | 507 | 16 | OAR16_18182900.1 | s47010.1         | 1410.34 | 34  |
| S772 |       | 140 | 16 | OAR16_18125193.1 | s55433.1         | 1342.03 | 32  |
| S772 |       | 702 | 16 | OAR16_11050320.1 | OAR16_20062365.1 | 9012.05 | 173 |
| S772 | CON   | 4   | 16 | OAR16_19414529.1 | s55433.1         | 52.695  | 2   |
| S772 | UNION | 4   | 16 | OAR16_11050320.1 | OAR16_21237906.1 | 10187.6 | 193 |
| S773 |       | 629 | 15 | s05399.1         | s61861.1         | 1488.93 | 30  |
| S773 |       | 126 | 15 | s60771.1         | s31640.1         | 1782.1  | 38  |
| S773 |       | 801 | 15 | s60771.1         | OAR15_41436474.1 | 1502.15 | 34  |



|      |       |     |    |                  |                  |         |     |
|------|-------|-----|----|------------------|------------------|---------|-----|
| S773 |       | 40  | 15 | OAR15_39858472.1 | s31640.1         | 1857.95 | 39  |
| S773 | CON   | 4   | 15 | s05399.1         | OAR15_41436474.1 | 1069.27 | 24  |
| S773 | UNION | 4   | 15 | OAR15_39858472.1 | s61861.1         | 1997.66 | 41  |
| S774 |       | 629 | 15 | s19289.1         | OAR15_33315132.1 | 6603.26 | 137 |
| S774 |       | 45  | 15 | s70134.1         | OAR15_33211632.1 | 5359.66 | 108 |
| S774 |       | 61  | 15 | s35266.1         | s02747.1         | 1983.57 | 37  |
| S774 |       | 123 | 15 | OAR15_31347502.1 | OAR15_32984442.1 | 1636.94 | 40  |
| S774 | CON   | 4   | 15 | OAR15_31347502.1 | s02747.1         | 443.91  | 11  |
| S774 | UNION | 4   | 15 | s19289.1         | OAR15_33315132.1 | 6603.26 | 137 |
| S775 |       | 123 | 15 | OAR15_26646294.1 | s74508.1         | 4322.48 | 83  |
| S775 |       | 629 | 15 | s19289.1         | OAR15_33315132.1 | 6603.26 | 137 |
| S775 |       | 45  | 15 | s70134.1         | OAR15_33211632.1 | 5359.66 | 108 |
| S775 |       | 61  | 15 | s35266.1         | s02747.1         | 1983.57 | 37  |
| S775 | CON   | 4   | 15 | s35266.1         | s74508.1         | 1160.93 | 18  |
| S775 | UNION | 4   | 15 | OAR15_26646294.1 | OAR15_33315132.1 | 6668.84 | 138 |
| S776 |       | 45  | 15 | s70134.1         | OAR15_33211632.1 | 5359.66 | 108 |
| S776 |       | 629 | 15 | s19289.1         | OAR15_33315132.1 | 6603.26 | 137 |
| S776 |       | 627 | 15 | s19289.1         | s49846.1         | 1306.64 | 30  |
| S776 |       | 123 | 15 | OAR15_26646294.1 | s74508.1         | 4322.48 | 83  |
| S776 | CON   | 4   | 15 | s70134.1         | s49846.1         | 166.542 | 5   |
| S776 | UNION | 4   | 15 | OAR15_26646294.1 | OAR15_33315132.1 | 6668.84 | 138 |
| S777 |       | 629 | 15 | s19289.1         | OAR15_33315132.1 | 6603.26 | 137 |
| S777 |       | 627 | 15 | s19289.1         | s49846.1         | 1306.64 | 30  |
| S777 |       | 123 | 15 | OAR15_26646294.1 | s74508.1         | 4322.48 | 83  |
| S777 |       | 507 | 15 | OAR15_24033751.1 | s73229.1         | 2732.28 | 57  |
| S777 | CON   | 4   | 15 | s19289.1         | s73229.1         | 54.154  | 2   |
| S777 | UNION | 4   | 15 | OAR15_24033751.1 | OAR15_33315132.1 | 9281.38 | 192 |
| S778 |       | 702 | 15 | s33423.1         | s34566.1         | 24919.4 | 406 |
| S778 |       | 126 | 15 | OAR15_16562183.1 | OAR15_22081912.1 | 5519.73 | 79  |
| S778 |       | 45  | 15 | s57471.1         | s74813.1         | 2367.54 | 41  |
| S778 |       | 29  | 15 | s45138.1         | s54251.1         | 1932.01 | 35  |
| S778 | CON   | 4   | 15 | s45138.1         | OAR15_22081912.1 | 135.81  | 4   |
| S778 | UNION | 4   | 15 | s33423.1         | s34566.1         | 24919.4 | 406 |
| S782 |       | 702 | 15 | s33423.1         | s34566.1         | 24919.4 | 406 |
| S782 |       | 157 | 15 | OAR15_2886961.1  | s14178.1         | 2148.25 | 37  |
| S782 |       | 27  | 15 | OAR15_3892898.1  | s07134.1         | 2095.32 | 35  |
| S782 |       | 49  | 15 | OAR15_4725093.1  | OAR15_14317931.1 | 9592.84 | 155 |
| S782 | CON   | 4   | 15 | OAR15_4725093.1  | s14178.1         | 310.12  | 5   |
| S782 | UNION | 4   | 15 | s33423.1         | s34566.1         | 24919.4 | 406 |
| S786 |       | 627 | 14 | s52668.1         | s53928.1         | 1830.97 | 35  |
| S786 |       | 629 | 14 | s52668.1         | s53928.1         | 1830.97 | 35  |
| S786 |       | 606 | 14 | s06052.1         | s53928.1         | 4103.06 | 57  |
| S786 |       | 702 | 14 | OAR14_63676213.1 | s42046.1         | 4180.8  | 44  |
| S786 | CON   | 4   | 14 | s52668.1         | s42046.1         | 385.002 | 9   |
| S786 | UNION | 4   | 14 | OAR14_63676213.1 | s53928.1         | 5626.77 | 70  |
| S792 |       | 606 | 14 | s06052.1         | s53928.1         | 4103.06 | 57  |
| S792 |       | 123 | 14 | s09739.1         | s73257.1         | 7402.46 | 63  |

|      |       |     |    |                    |                  |         |     |
|------|-------|-----|----|--------------------|------------------|---------|-----|
| S792 |       | 49  | 14 | OAR14_63676213.1   | OAR14_66990507.1 | 3314.29 | 31  |
| S792 |       | 702 | 14 | OAR14_63676213.1   | s42046.1         | 4180.8  | 44  |
| S792 | CON   | 4   | 14 | s06052.1           | s73257.1         | 74.091  | 3   |
| S792 | UNION | 4   | 14 | s09739.1           | s53928.1         | 11431.4 | 117 |
| S796 |       | 126 | 14 | OAR14_58104354.1   | s36676.1         | 6513.92 | 50  |
| S796 |       | 123 | 14 | s09739.1           | s73257.1         | 7402.46 | 63  |
| S796 |       | 49  | 14 | OAR14_63676213.1   | OAR14_66990507.1 | 3314.29 | 31  |
| S796 |       | 702 | 14 | OAR14_63676213.1   | s42046.1         | 4180.8  | 44  |
| S796 | CON   | 4   | 14 | OAR14_63676213.1   | s36676.1         | 942.065 | 7   |
| S796 | UNION | 4   | 14 | s09739.1           | s42046.1         | 9985.46 | 91  |
| S797 |       | 126 | 14 | OAR14_58104354.1   | s36676.1         | 6513.92 | 50  |
| S797 |       | 123 | 14 | s09739.1           | s73257.1         | 7402.46 | 63  |
| S797 |       | 702 | 14 | s52270.1           | s56709.1         | 2277.8  | 36  |
| S797 |       | 90  | 14 | OAR14_55447588.1   | OAR14_58537282.1 | 3089.69 | 43  |
| S797 | CON   | 4   | 14 | OAR14_58104354.1   | OAR14_58537282.1 | 432.928 | 9   |
| S797 | UNION | 4   | 14 | OAR14_55447588.1   | s73257.1         | 9826.42 | 93  |
| S803 |       | 152 | 14 | s40481.1           | OAR14_47633470.1 | 2753    | 41  |
| S803 |       | 507 | 14 | DU411145_363.1     | s54719.1         | 2325.47 | 34  |
| S803 |       | 157 | 14 | s68508.1           | s07549.1         | 2905.99 | 44  |
| S803 |       | 606 | 14 | s00394.1           | s17905.1         | 3115.89 | 43  |
| S803 | CON   | 4   | 14 | s68508.1           | s54719.1         | 237.245 | 4   |
| S803 | UNION | 4   | 14 | DU411145_363.1     | s07549.1         | 4994.21 | 74  |
| S814 |       | 152 | 14 | s40481.1           | OAR14_47633470.1 | 2753    | 41  |
| S814 |       | 507 | 14 | DU411145_363.1     | s54719.1         | 2325.47 | 34  |
| S814 |       | 556 | 14 | OAR14_41540680_X.1 | OAR14_44901131.1 | 3360.45 | 52  |
| S814 |       | 606 | 14 | s00394.1           | s17905.1         | 3115.89 | 43  |
| S814 | CON   | 4   | 14 | s40481.1           | OAR14_44901131.1 | 20.664  | 2   |
| S814 | UNION | 4   | 14 | OAR14_41540680_X.1 | OAR14_47633470.1 | 6092.79 | 91  |
| S815 |       | 507 | 14 | DU411145_363.1     | s54719.1         | 2325.47 | 34  |
| S815 |       | 90  | 14 | s10566.1           | s18934.1         | 2141.14 | 32  |
| S815 |       | 556 | 14 | OAR14_41540680_X.1 | OAR14_44901131.1 | 3360.45 | 52  |
| S815 |       | 606 | 14 | s00394.1           | s17905.1         | 3115.89 | 43  |
| S815 | CON   | 4   | 14 | s00394.1           | s18934.1         | 670.357 | 8   |
| S815 | UNION | 4   | 14 | OAR14_41540680_X.1 | s17905.1         | 5668.96 | 83  |
| S816 |       | 90  | 14 | s10566.1           | s18934.1         | 2141.14 | 32  |
| S816 |       | 61  | 14 | s31260.1           | OAR14_42706372.1 | 1673.04 | 30  |
| S816 |       | 801 | 14 | OAR14_38675883.1   | s10566.1         | 3947.09 | 73  |
| S816 |       | 556 | 14 | OAR14_41540680_X.1 | OAR14_44901131.1 | 3360.45 | 52  |
| S816 | CON   | 4   | 14 | s10566.1           | s10566.1         | 0       | 1   |
| S816 | UNION | 4   | 14 | OAR14_38675883.1   | OAR14_44901131.1 | 6225.25 | 108 |
| S817 |       | 627 | 14 | OAR14_18935490.1   | s63952.1         | 3002.98 | 58  |
| S817 |       | 629 | 14 | OAR14_17682700.1   | OAR14_19525237.1 | 1842.54 | 32  |
| S817 |       | 45  | 14 | s57041.1           | OAR14_19869404.1 | 8348.89 | 136 |
| S817 |       | 702 | 14 | s22016.1           | s49153.1         | 8137.25 | 142 |
| S817 | CON   | 4   | 14 | OAR14_18935490.1   | OAR14_19525237.1 | 589.747 | 10  |
| S817 | UNION | 4   | 14 | s57041.1           | s49153.1         | 14518.7 | 245 |
| S818 |       | 629 | 14 | OAR14_17682700.1   | OAR14_19525237.1 | 1842.54 | 32  |

|      |       |     |    |                  |                  |         |     |
|------|-------|-----|----|------------------|------------------|---------|-----|
| S818 |       | 45  | 14 | s57041.1         | OAR14_19869404.1 | 8348.89 | 136 |
| S818 |       | 702 | 14 | s22016.1         | s49153.1         | 8137.25 | 142 |
| S818 |       | 507 | 14 | s19019.1         | s31525.1         | 5170.03 | 82  |
| S818 | CON   | 4   | 14 | s22016.1         | s31525.1         | 118.123 | 3   |
| S818 | UNION | 4   | 14 | s57041.1         | s49153.1         | 14518.7 | 245 |
|      |       |     |    |                  |                  |         |     |
| S819 |       | 627 | 14 | s56240.1         | OAR14_16764006.1 | 4385.77 | 69  |
| S819 |       | 45  | 14 | s57041.1         | OAR14_19869404.1 | 8348.89 | 136 |
| S819 |       | 629 | 14 | s75886.1         | OAR14_16276596.1 | 6006.72 | 97  |
| S819 |       | 507 | 14 | s19019.1         | s31525.1         | 5170.03 | 82  |
| S819 | CON   | 4   | 14 | s19019.1         | OAR14_16276596.1 | 3426.52 | 55  |
| S819 | UNION | 4   | 14 | s75886.1         | OAR14_19869404.1 | 9599.53 | 154 |
|      |       |     |    |                  |                  |         |     |
| S820 |       | 702 | 13 | s61419.1         | OAR13_89063022.1 | 2424.17 | 48  |
| S820 |       | 27  | 13 | s57248.1         | OAR13_87964841.1 | 3134.51 | 57  |
| S820 |       | 507 | 13 | OAR13_82659110.1 | OAR13_89063022.1 | 6403.91 | 118 |
| S820 |       | 140 | 13 | OAR13_85176472.1 | OAR13_89063022.1 | 3886.55 | 70  |
| S820 | CON   | 4   | 13 | s61419.1         | OAR13_87964841.1 | 1325.99 | 28  |
| S820 | UNION | 4   | 13 | OAR13_82659110.1 | OAR13_89063022.1 | 6403.91 | 118 |
|      |       |     |    |                  |                  |         |     |
| S821 |       | 606 | 13 | OAR13_60423450.1 | s33005.1         | 3263.21 | 60  |
| S821 |       | 702 | 13 | s43103.1         | s69997.1         | 32663.3 | 559 |
| S821 |       | 40  | 13 | s32476.1         | s31201.1         | 1232.63 | 30  |
| S821 |       | 79  | 13 | s16241.1         | s70884.1         | 1871.22 | 43  |
| S821 | CON   | 4   | 13 | OAR13_60423450.1 | s70884.1         | 586.444 | 15  |
| S821 | UNION | 4   | 13 | s43103.1         | s69997.1         | 32663.3 | 559 |
|      |       |     |    |                  |                  |         |     |
| S822 |       | 556 | 13 | s18674.1         | OAR13_44631782.1 | 5987.19 | 98  |
| S822 |       | 49  | 13 | OAR13_37697946.1 | OAR13_39146165.1 | 1448.22 | 32  |
| S822 |       | 29  | 13 | OAR13_39146165.1 | OAR13_41484865.1 | 2338.7  | 37  |
| S822 |       | 629 | 13 | OAR13_34785098.1 | s67974.1         | 5171.07 | 99  |
| S822 | CON   | 4   | 13 | OAR13_39146165.1 | OAR13_39146165.1 | 0       | 1   |
| S822 | UNION | 4   | 13 | OAR13_34785098.1 | OAR13_44631782.1 | 9846.68 | 171 |
|      |       |     |    |                  |                  |         |     |
| S823 |       | 90  | 13 | OAR13_35648372.1 | s26568.1         | 2163.61 | 45  |
| S823 |       | 629 | 13 | OAR13_34785098.1 | s67974.1         | 5171.07 | 99  |
| S823 |       | 49  | 13 | OAR13_37697946.1 | OAR13_39146165.1 | 1448.22 | 32  |
| S823 |       | 829 | 13 | s29601.1         | OAR13_37876562.1 | 14843.5 | 275 |
| S823 | CON   | 4   | 13 | OAR13_37697946.1 | s26568.1         | 114.038 | 3   |
| S823 | UNION | 4   | 13 | s29601.1         | s67974.1         | 16923.1 | 318 |
|      |       |     |    |                  |                  |         |     |
| S824 |       | 61  | 13 | OAR13_13641626.1 | OAR13_15911703.1 | 2270.08 | 44  |
| S824 |       | 49  | 13 | OAR13_13577766.1 | OAR13_17982125.1 | 4404.36 | 89  |
| S824 |       | 152 | 13 | OAR13_12044615.1 | OAR13_13987202.1 | 1942.59 | 36  |
| S824 |       | 829 | 13 | s65179.1         | OAR13_13952314.1 | 3280.8  | 41  |
| S824 | CON   | 4   | 13 | OAR13_13641626.1 | OAR13_13952314.1 | 310.688 | 9   |
| S824 | UNION | 4   | 13 | s65179.1         | OAR13_17982125.1 | 7310.61 | 120 |
|      |       |     |    |                  |                  |         |     |
| S827 |       | 29  | 12 | OAR12_70366176.1 | OAR12_73124271.1 | 2758.09 | 61  |
| S827 |       | 40  | 12 | OAR12_72598226.1 | OAR12_74743841.1 | 2145.61 | 46  |
| S827 |       | 90  | 12 | OAR12_72461244.1 | s65734.1         | 2576.88 | 55  |
| S827 |       | 152 | 12 | OAR12_71058743.1 | s72894.1         | 1825.25 | 41  |
| S827 | CON   | 4   | 12 | OAR12_72598226.1 | s72894.1         | 285.766 | 7   |
| S827 | UNION | 4   | 12 | OAR12_70366176.1 | s65734.1         | 4671.94 | 102 |

|      |       |     |    |                    |                    |         |      |
|------|-------|-----|----|--------------------|--------------------|---------|------|
| S828 |       | 152 | 12 | OAR12_71058743.1   | s72894.1           | 1825.25 | 41   |
| S828 |       | 123 | 12 | OAR12_70188998.1   | OAR12_72385165.1   | 2196.17 | 47   |
| S828 |       | 702 | 12 | s22960.1           | s60710.1           | 58755.9 | 1088 |
| S828 |       | 29  | 12 | OAR12_70366176.1   | OAR12_73124271.1   | 2758.09 | 61   |
| S828 | CON   | 4   | 12 | OAR12_71058743.1   | s60710.1           | 842.053 | 19   |
| S828 | UNION | 4   | 12 | s22960.1           | OAR12_73124271.1   | 59979.4 | 1114 |
| S829 |       | 702 | 12 | s22960.1           | s60710.1           | 58755.9 | 1088 |
| S829 |       | 79  | 12 | OAR12_12066172.1   | OAR12_16134990.1   | 4068.82 | 79   |
| S829 |       | 140 | 12 | OAR12_11773176.1   | OAR12_13334889.1   | 1561.71 | 30   |
| S829 |       | 507 | 12 | s13792.1           | s57817.1           | 31188.2 | 514  |
| S829 | CON   | 4   | 12 | s22960.1           | OAR12_13334889.1   | 189.999 | 6    |
| S829 | UNION | 4   | 12 | s13792.1           | s60710.1           | 71900.8 | 1272 |
| S830 |       | 556 | 11 | s59845.1           | OAR11_63406239.1   | 2453.91 | 35   |
| S830 |       | 152 | 11 | OAR11_57189920.1   | OAR11_61713996.1   | 4524.08 | 72   |
| S830 |       | 629 | 11 | s13742.1           | OAR11_61687914.1   | 12951   | 212  |
| S830 |       | 702 | 11 | OAR11_57135966.1   | OAR11_63846580.1   | 6710.61 | 109  |
| S830 | CON   | 4   | 11 | s59845.1           | OAR11_61687914.1   | 735.581 | 7    |
| S830 | UNION | 4   | 11 | s13742.1           | OAR11_63846580.1   | 15109.6 | 249  |
| S833 |       | 629 | 11 | s13742.1           | OAR11_61687914.1   | 12951   | 212  |
| S833 |       | 702 | 11 | OAR11_57135966.1   | OAR11_63846580.1   | 6710.61 | 109  |
| S833 |       | 152 | 11 | OAR11_57189920.1   | OAR11_61713996.1   | 4524.08 | 72   |
| S833 |       | 140 | 11 | s19721.1           | s56411.1           | 2390.11 | 37   |
| S833 | CON   | 4   | 11 | s19721.1           | s56411.1           | 2390.11 | 37   |
| S833 | UNION | 4   | 11 | s13742.1           | OAR11_63846580.1   | 15109.6 | 249  |
| S834 |       | 90  | 11 | s07556.1           | OAR11_55421823.1   | 8158.13 | 135  |
| S834 |       | 702 | 11 | OAR11_45618835.1   | OAR11_53479950.1   | 7861.11 | 136  |
| S834 |       | 627 | 11 | s53130.1           | OAR11_47522525.1   | 5053.14 | 79   |
| S834 |       | 556 | 11 | s45011.1           | OAR11_47646066_X.1 | 5597.73 | 89   |
| S834 | CON   | 4   | 11 | s07556.1           | OAR11_47522525.1   | 258.834 | 3    |
| S834 | UNION | 4   | 11 | s45011.1           | OAR11_55421823.1   | 13373.5 | 218  |
| S835 |       | 79  | 11 | s73325.1           | s62452.1           | 1651.72 | 35   |
| S835 |       | 27  | 11 | s04627.1           | s73325.1           | 5587.46 | 73   |
| S835 |       | 702 | 11 | OAR11_17172323.1   | OAR11_33359712.1   | 16187.4 | 260  |
| S835 |       | 90  | 11 | s08572.1           | OAR11_30551868.1   | 7951.23 | 122  |
| S835 | CON   | 4   | 11 | s73325.1           | s73325.1           | 0       | 1    |
| S835 | UNION | 4   | 11 | OAR11_17172323.1   | OAR11_33359712.1   | 16187.4 | 260  |
| S836 |       | 45  | 10 | OAR10_79145098.1   | OAR10_87563877.1   | 8418.78 | 181  |
| S836 |       | 79  | 10 | OAR10_79145098.1   | s67060.1           | 9854.04 | 210  |
| S836 |       | 629 | 10 | OAR10_81430826_X.1 | OAR10_83541915.1   | 2111.09 | 43   |
| S836 |       | 140 | 10 | s75182.1           | OAR10_84250273.1   | 1485.41 | 36   |
| S836 | CON   | 4   | 10 | s75182.1           | OAR10_83541915.1   | 777.05  | 19   |
| S836 | UNION | 4   | 10 | OAR10_79145098.1   | s67060.1           | 9854.04 | 210  |
| S842 |       | 27  | 10 | OAR10_52097098.1   | OAR10_55148103.1   | 3051.01 | 65   |
| S842 |       | 45  | 10 | OAR10_35722333.1   | OAR10_57396545.1   | 21674.2 | 405  |
| S842 |       | 157 | 10 | OAR10_47747943.1   | OAR10_53208154_X.1 | 5460.21 | 117  |
| S842 |       | 606 | 10 | OAR10_51406054.1   | OAR10_52777291.1   | 1371.24 | 30   |
| S842 | CON   | 4   | 10 | OAR10_52097098.1   | OAR10_52777291.1   | 680.193 | 16   |
| S842 | UNION | 4   | 10 | OAR10_35722333.1   | OAR10_57396545.1   | 21674.2 | 405  |

|      |       |     |    |                  |                    |         |      |
|------|-------|-----|----|------------------|--------------------|---------|------|
| S846 |       | 829 | 10 | OAR10_33047233.1 | OAR10_51969493.1   | 18922.3 | 352  |
| S846 |       | 45  | 10 | OAR10_35722333.1 | OAR10_57396545.1   | 21674.2 | 405  |
| S846 |       | 157 | 10 | OAR10_47747943.1 | OAR10_53208154_X.1 | 5460.21 | 117  |
| S846 |       | 606 | 10 | OAR10_51406054.1 | OAR10_52777291.1   | 1371.24 | 30   |
| S846 | CON   | 4   | 10 | OAR10_51406054.1 | OAR10_51969493.1   | 563.439 | 13   |
| S846 | UNION | 4   | 10 | OAR10_33047233.1 | OAR10_57396545.1   | 24349.3 | 459  |
| S847 |       | 702 | 10 | s49567.1         | OAR10_48462141.1   | 48462.1 | 914  |
| S847 |       | 829 | 10 | OAR10_33047233.1 | OAR10_51969493.1   | 18922.3 | 352  |
| S847 |       | 45  | 10 | OAR10_35722333.1 | OAR10_57396545.1   | 21674.2 | 405  |
| S847 |       | 157 | 10 | OAR10_47747943.1 | OAR10_53208154_X.1 | 5460.21 | 117  |
| S847 | CON   | 4   | 10 | OAR10_47747943.1 | OAR10_48462141.1   | 714.198 | 15   |
| S847 | UNION | 4   | 10 | s49567.1         | OAR10_57396545.1   | 57396.5 | 1095 |
| S854 |       | 829 | 10 | OAR10_33047233.1 | OAR10_51969493.1   | 18922.3 | 352  |
| S854 |       | 606 | 10 | s44276.1         | s64007.1           | 1390.84 | 30   |
| S854 |       | 702 | 10 | s49567.1         | OAR10_48462141.1   | 48462.1 | 914  |
| S854 |       | 126 | 10 | OAR10_33047233.1 | s27070.1           | 1834.38 | 36   |
| S854 | CON   | 4   | 10 | OAR10_33047233.1 | s64007.1           | 1368.31 | 29   |
| S854 | UNION | 4   | 10 | s49567.1         | OAR10_51969493.1   | 51969.5 | 988  |
| S855 |       | 702 | 10 | s49567.1         | OAR10_48462141.1   | 48462.1 | 914  |
| S855 |       | 844 | 10 | OAR10_17703888.1 | s09622.1           | 13279.3 | 268  |
| S855 |       | 49  | 10 | OAR10_29907137.1 | s34530.1           | 1490.58 | 33   |
| S855 |       | 801 | 10 | OAR10_30059832.1 | s26724.1           | 2707.32 | 56   |
| S855 | CON   | 4   | 10 | OAR10_30059832.1 | s09622.1           | 923.343 | 19   |
| S855 | UNION | 4   | 10 | s49567.1         | OAR10_48462141.1   | 48462.1 | 914  |
| S856 |       | 702 | 10 | s49567.1         | OAR10_48462141.1   | 48462.1 | 914  |
| S856 |       | 844 | 10 | OAR10_11311566.1 | OAR10_15972516.1   | 4660.95 | 92   |
| S856 |       | 123 | 10 | OAR10_12900328.1 | OAR10_15258330.1   | 2358    | 47   |
| S856 |       | 40  | 10 | s10371.1         | s16574.1           | 1926.17 | 41   |
| S856 | CON   | 4   | 10 | s10371.1         | OAR10_15258330.1   | 1670.43 | 36   |
| S856 | UNION | 4   | 10 | s49567.1         | OAR10_48462141.1   | 48462.1 | 914  |
| S870 |       | 126 | 10 | OAR10_10194483.1 | OAR10_12381159_X.1 | 2186.68 | 41   |
| S870 |       | 61  | 10 | OAR10_9852956.1  | s23854.1           | 2137.39 | 41   |
| S870 |       | 702 | 10 | s49567.1         | OAR10_48462141.1   | 48462.1 | 914  |
| S870 |       | 844 | 10 | OAR10_11311566.1 | OAR10_15972516.1   | 4660.95 | 92   |
| S870 | CON   | 4   | 10 | OAR10_11311566.1 | s23854.1           | 678.78  | 15   |
| S870 | UNION | 4   | 10 | s49567.1         | OAR10_48462141.1   | 48462.1 | 914  |
| S871 |       | 606 | 10 | s62543.1         | OAR10_9807313.1    | 1736.97 | 33   |
| S871 |       | 126 | 10 | s49567.1         | OAR10_9585529.1    | 9585.53 | 173  |
| S871 |       | 702 | 10 | s49567.1         | OAR10_48462141.1   | 48462.1 | 914  |
| S871 |       | 29  | 10 | s62543.1         | s72120.1           | 1935.26 | 37   |
| S871 | CON   | 4   | 10 | s62543.1         | OAR10_9585529.1    | 1515.19 | 28   |
| S871 | UNION | 4   | 10 | s49567.1         | OAR10_48462141.1   | 48462.1 | 914  |
| S872 |       | 616 | 10 | OAR10_1660541.1  | OAR10_5599088.1    | 3938.55 | 71   |
| S872 |       | 126 | 10 | s49567.1         | OAR10_9585529.1    | 9585.53 | 173  |
| S872 |       | 629 | 10 | OAR10_5271954.1  | OAR10_7507728.1    | 2235.77 | 34   |
| S872 |       | 702 | 10 | s49567.1         | OAR10_48462141.1   | 48462.1 | 914  |
| S872 | CON   | 4   | 10 | OAR10_5271954.1  | OAR10_5599088.1    | 327.134 | 5    |

|      |       |     |    |                    |                   |         |      |
|------|-------|-----|----|--------------------|-------------------|---------|------|
| S872 | UNION | 4   | 10 | s49567.1           | OAR10_48462141.1  | 48462.1 | 914  |
| S876 |       | 616 | 10 | OAR10_1660541.1    | OAR10_5599088.1   | 3938.55 | 71   |
| S876 |       | 126 | 10 | s49567.1           | OAR10_9585529.1   | 9585.53 | 173  |
| S876 |       | 507 | 10 | OARUn.1971_37990.1 | OAR10_1895343.1   | 1895.34 | 48   |
| S876 |       | 702 | 10 | s49567.1           | OAR10_48462141.1  | 48462.1 | 914  |
| S876 | CON   | 4   | 10 | OAR10_1660541.1    | OAR10_1895343.1   | 234.802 | 7    |
| S876 | UNION | 4   | 10 | OARUn.1971_37990.1 | OAR10_48462141.1  | 48462.1 | 919  |
| S877 |       | 152 | 9  | s72980.1           | s29382.1          | 1444.6  | 30   |
| S877 |       | 27  | 9  | s28418.1           | s60249.1          | 1605.72 | 34   |
| S877 |       | 616 | 9  | OAR9_85044633.1    | s64103.1          | 2852.17 | 62   |
| S877 |       | 702 | 9  | OAR9_38323108.1    | OAR9_96544082.1   | 58221   | 1087 |
| S877 | CON   | 4   | 9  | s72980.1           | s60249.1          | 297.948 | 7    |
| S877 | UNION | 4   | 9  | OAR9_38323108.1    | OAR9_96544082.1   | 58221   | 1087 |
| S881 |       | 152 | 9  | OAR9_77508470.1    | s62001.1          | 3135.15 | 63   |
| S881 |       | 507 | 9  | OAR9_72979014.1    | OAR9_79627675.1   | 6648.66 | 130  |
| S881 |       | 702 | 9  | OAR9_38323108.1    | OAR9_96544082.1   | 58221   | 1087 |
| S881 |       | 29  | 9  | OAR9_75929101.1    | OAR9_77728428.1   | 1799.33 | 33   |
| S881 | CON   | 4   | 9  | OAR9_77508470.1    | OAR9_77728428.1   | 219.958 | 4    |
| S881 | UNION | 4   | 9  | OAR9_38323108.1    | OAR9_96544082.1   | 58221   | 1087 |
| S885 |       | 507 | 9  | OAR9_72979014.1    | OAR9_79627675.1   | 6648.66 | 130  |
| S885 |       | 27  | 9  | OAR9_71313922.1    | OAR9_75600035_X.1 | 4286.11 | 88   |
| S885 |       | 29  | 9  | OAR9_69054720.1    | OAR9_73056873.1   | 4002.15 | 80   |
| S885 |       | 702 | 9  | OAR9_38323108.1    | OAR9_96544082.1   | 58221   | 1087 |
| S885 | CON   | 4   | 9  | OAR9_72979014.1    | OAR9_73056873.1   | 77.859  | 3    |
| S885 | UNION | 4   | 9  | OAR9_38323108.1    | OAR9_96544082.1   | 58221   | 1087 |
| S886 |       | 45  | 9  | s68634.1           | s50783.1          | 21048.3 | 358  |
| S886 |       | 702 | 9  | OAR9_38323108.1    | OAR9_96544082.1   | 58221   | 1087 |
| S886 |       | 801 | 9  | s24048.1           | OAR9_55350197.1   | 4983.18 | 48   |
| S886 |       | 629 | 9  | OAR9_55140044.1    | OAR9_63193973.1   | 8053.93 | 166  |
| S886 | CON   | 4   | 9  | OAR9_55140044.1    | OAR9_55350197.1   | 210.153 | 5    |
| S886 | UNION | 4   | 9  | s68634.1           | OAR9_96544082.1   | 60605.7 | 1136 |
| S887 |       | 45  | 9  | s68634.1           | s50783.1          | 21048.3 | 358  |
| S887 |       | 702 | 9  | OAR9_38323108.1    | OAR9_96544082.1   | 58221   | 1087 |
| S887 |       | 507 | 9  | OAR9_42661858.1    | OAR9_44747972.1   | 2086.11 | 49   |
| S887 |       | 49  | 9  | OAR9_43772610.1    | s14105.1          | 3346.05 | 63   |
| S887 | CON   | 4   | 9  | OAR9_43772610.1    | OAR9_44747972.1   | 975.362 | 22   |
| S887 | UNION | 4   | 9  | s68634.1           | OAR9_96544082.1   | 60605.7 | 1136 |
| S892 |       | 61  | 9  | OAR9_23382060.1    | s56435.1          | 7434.21 | 145  |
| S892 |       | 45  | 9  | OAR9_26972939.1    | OAR9_35203437.1   | 8230.5  | 170  |
| S892 |       | 152 | 9  | OAR9_28346970.1    | OAR9_30909060.1   | 2562.09 | 52   |
| S892 |       | 27  | 9  | s30783.1           | OAR9_32605349.1   | 3103.89 | 69   |
| S892 | CON   | 4   | 9  | s30783.1           | s56435.1          | 1314.82 | 30   |
| S892 | UNION | 4   | 9  | OAR9_23382060.1    | OAR9_35203437.1   | 11821.4 | 246  |
| S893 |       | 61  | 9  | OAR9_23382060.1    | s56435.1          | 7434.21 | 145  |
| S893 |       | 49  | 9  | OAR9_26114366.1    | s24569.1          | 2421.05 | 37   |
| S893 |       | 45  | 9  | OAR9_26972939.1    | OAR9_35203437.1   | 8230.5  | 170  |
| S893 |       | 152 | 9  | OAR9_28346970.1    | OAR9_30909060.1   | 2562.09 | 52   |

|      |       |     |   |                 |                 |         |     |
|------|-------|-----|---|-----------------|-----------------|---------|-----|
| S893 | CON   | 4   | 9 | OAR9_28346970.1 | s24569.1        | 188.443 | 5   |
| S893 | UNION | 4   | 9 | OAR9_23382060.1 | OAR9_35203437.1 | 11821.4 | 246 |
| S896 |       | 45  | 9 | OAR9_26972939.1 | OAR9_35203437.1 | 8230.5  | 170 |
| S896 |       | 90  | 9 | s19462.1        | s01999.1        | 3928.4  | 85  |
| S896 |       | 61  | 9 | OAR9_23382060.1 | s56435.1        | 7434.21 | 145 |
| S896 |       | 49  | 9 | OAR9_26114366.1 | s24569.1        | 2421.05 | 37  |
| S896 | CON   | 4   | 9 | OAR9_26972939.1 | s01999.1        | 116.369 | 2   |
| S896 | UNION | 4   | 9 | s19462.1        | OAR9_35203437.1 | 12042.5 | 253 |
| S897 |       | 49  | 9 | OAR9_26114366.1 | s24569.1        | 2421.05 | 37  |
| S897 |       | 507 | 9 | s75518.1        | OAR9_26587263.1 | 2962.39 | 66  |
| S897 |       | 61  | 9 | OAR9_23382060.1 | s56435.1        | 7434.21 | 145 |
| S897 |       | 90  | 9 | s19462.1        | s01999.1        | 3928.4  | 85  |
| S897 | CON   | 4   | 9 | OAR9_26114366.1 | OAR9_26587263.1 | 472.897 | 8   |
| S897 | UNION | 4   | 9 | s19462.1        | s56435.1        | 7655.36 | 152 |
| S898 |       | 152 | 9 | OAR9_8876882.1  | s21274.1        | 4522.12 | 76  |
| S898 |       | 79  | 9 | OAR9_8757504.1  | OAR9_10494263.1 | 1736.76 | 34  |
| S898 |       | 123 | 9 | OAR9_8757504.1  | OAR9_10494263.1 | 1736.76 | 34  |
| S898 |       | 844 | 9 | OAR9_5773857.1  | s10011.1        | 10109   | 172 |
| S898 | CON   | 4   | 9 | OAR9_8876882.1  | OAR9_10494263.1 | 1617.38 | 33  |
| S898 | UNION | 4   | 9 | OAR9_5773857.1  | s10011.1        | 10109   | 172 |
| S901 |       | 829 | 8 | OAR8_82151383.1 | OAR8_84067219.1 | 1915.84 | 39  |
| S901 |       | 79  | 8 | OAR8_81635650.1 | OAR8_87540028.1 | 5904.38 | 127 |
| S901 |       | 49  | 8 | OAR8_77578890.1 | s01826.1        | 8664.11 | 175 |
| S901 |       | 844 | 8 | OAR8_82151383.1 | OAR8_84032183.1 | 1880.8  | 38  |
| S901 | CON   | 4   | 8 | OAR8_82151383.1 | OAR8_84032183.1 | 1880.8  | 38  |
| S901 | UNION | 4   | 8 | OAR8_77578890.1 | OAR8_87540028.1 | 9961.14 | 204 |
| S902 |       | 27  | 8 | OAR8_73702430.1 | s22687.1        | 2779.43 | 58  |
| S902 |       | 140 | 8 | OAR8_73355352.1 | s22687.1        | 3126.51 | 64  |
| S902 |       | 152 | 8 | OAR8_72707636.1 | OAR8_74991269.1 | 2283.63 | 44  |
| S902 |       | 507 | 8 | s24061.1        | OAR8_74194992.1 | 1639.28 | 32  |
| S902 | CON   | 4   | 8 | OAR8_73702430.1 | OAR8_74194992.1 | 492.562 | 9   |
| S902 | UNION | 4   | 8 | s24061.1        | s22687.1        | 3926.15 | 81  |
| S903 |       | 61  | 8 | OAR8_69411239.1 | OAR8_73226726.1 | 3815.49 | 73  |
| S903 |       | 45  | 8 | OAR8_68565079.1 | OAR8_70323257.1 | 1758.18 | 37  |
| S903 |       | 829 | 8 | s72483.1        | OAR8_69681597.1 | 2268.01 | 50  |
| S903 |       | 126 | 8 | OAR8_69411239.1 | OAR8_72238134.1 | 2826.89 | 57  |
| S903 | CON   | 4   | 8 | OAR8_69411239.1 | OAR8_69681597.1 | 270.358 | 7   |
| S903 | UNION | 4   | 8 | s72483.1        | OAR8_73226726.1 | 5813.14 | 116 |
| S906 |       | 627 | 8 | OAR8_62742101.1 | OAR8_65291492.1 | 2549.39 | 49  |
| S906 |       | 629 | 8 | OAR8_62742101.1 | OAR8_65291492.1 | 2549.39 | 49  |
| S906 |       | 126 | 8 | OAR8_62481318.1 | OAR8_64247515.1 | 1766.2  | 33  |
| S906 |       | 45  | 8 | OAR8_62748427.1 | OAR8_67327419.1 | 4578.99 | 91  |
| S906 | CON   | 4   | 8 | OAR8_62748427.1 | OAR8_64247515.1 | 1499.09 | 27  |
| S906 | UNION | 4   | 8 | OAR8_62481318.1 | OAR8_67327419.1 | 4846.1  | 97  |
| S907 |       | 49  | 8 | OAR8_45873570.1 | OAR8_48463824.1 | 2590.25 | 47  |
| S907 |       | 140 | 8 | s61158.1        | OAR8_52791160.1 | 9209.77 | 166 |
| S907 |       | 126 | 8 | OAR8_42338337.1 | OAR8_45925190.1 | 3586.85 | 72  |

|      |       |     |   |                  |                    |         |     |
|------|-------|-----|---|------------------|--------------------|---------|-----|
| S907 |       | 829 | 8 | s66809.1         | OAR8_49120824.1    | 9189.29 | 175 |
| S907 | CON   | 4   | 8 | OAR8_45873570.1  | OAR8_45925190.1    | 51.62   | 2   |
| S907 | UNION | 4   | 8 | s66809.1         | OAR8_52791160.1    | 12859.6 | 240 |
| S910 |       | 27  | 8 | OAR8_27562398.1  | s58158.1           | 1805.47 | 35  |
| S910 |       | 140 | 8 | OAR8_26330799.1  | OAR8_31515043.1    | 5184.24 | 103 |
| S910 |       | 702 | 8 | OAR8_26793121.1  | OAR8_38710483.1    | 11917.4 | 231 |
| S910 |       | 126 | 8 | s69453.1         | s50983.1           | 4232.26 | 88  |
| S910 | CON   | 4   | 8 | s69453.1         | s58158.1           | 1197.75 | 24  |
| S910 | UNION | 4   | 8 | OAR8_26330799.1  | OAR8_38710483.1    | 12379.7 | 239 |
| S911 |       | 27  | 8 | OAR8_27562398.1  | s58158.1           | 1805.47 | 35  |
| S911 |       | 140 | 8 | OAR8_26330799.1  | OAR8_31515043.1    | 5184.24 | 103 |
| S911 |       | 45  | 8 | OAR8_23402353.1  | OAR8_27562398.1    | 4160.05 | 77  |
| S911 |       | 702 | 8 | OAR8_26793121.1  | OAR8_38710483.1    | 11917.4 | 231 |
| S911 | CON   | 4   | 8 | OAR8_27562398.1  | OAR8_27562398.1    | 0       | 1   |
| S911 | UNION | 4   | 8 | OAR8_23402353.1  | OAR8_38710483.1    | 15308.1 | 293 |
| S916 |       | 40  | 8 | OAR8_19634473.1  | OAR8_21223050.1    | 1588.58 | 30  |
| S916 |       | 45  | 8 | OAR8_17854216.1  | s00683.1           | 2986.56 | 63  |
| S916 |       | 27  | 8 | OAR8_16197437.1  | OAR8_22199299_X.1  | 6001.86 | 125 |
| S916 |       | 152 | 8 | OAR8_19076673.1  | OAR8_21072066.1    | 1995.39 | 36  |
| S916 | CON   | 4   | 8 | OAR8_19634473.1  | s00683.1           | 1206.3  | 22  |
| S916 | UNION | 4   | 8 | OAR8_16197437.1  | OAR8_22199299_X.1  | 6001.86 | 125 |
| S917 |       | 829 | 8 | OAR8_3622334.1   | s46148.1           | 3360.96 | 72  |
| S917 |       | 79  | 8 | DU438038_308.1   | OAR8_12613673.1    | 9152.14 | 171 |
| S917 |       | 157 | 8 | DU438038_308.1   | s74313.1           | 3885.06 | 82  |
| S917 |       | 507 | 8 | OAR8_5038936.1   | OAR8_6495392.1     | 1456.46 | 31  |
| S917 | CON   | 4   | 8 | OAR8_5038936.1   | OAR8_6495392.1     | 1456.46 | 31  |
| S917 | UNION | 4   | 8 | DU438038_308.1   | OAR8_12613673.1    | 9152.14 | 171 |
| S918 |       | 616 | 7 | OAR7_33605191.1  | OAR7_35261620.1    | 1656.43 | 32  |
| S918 |       | 507 | 7 | OAR7_32708552.1  | OAR7_34234525.1    | 1525.97 | 30  |
| S918 |       | 45  | 7 | OAR7_31172405.1  | OAR7_58958307.1    | 27785.9 | 542 |
| S918 |       | 702 | 7 | OAR7_31685912.1  | OAR7_72973471.1    | 41287.6 | 769 |
| S918 | CON   | 4   | 7 | OAR7_33605191.1  | OAR7_34234525.1    | 629.334 | 11  |
| S918 | UNION | 4   | 7 | OAR7_31172405.1  | OAR7_72973471.1    | 41801.1 | 782 |
| S919 |       | 126 | 7 | OAR7_31134779.1  | OAR7_32846682.1    | 1711.9  | 37  |
| S919 |       | 45  | 7 | OAR7_31172405.1  | OAR7_58958307.1    | 27785.9 | 542 |
| S919 |       | 702 | 7 | OAR7_31685912.1  | OAR7_72973471.1    | 41287.6 | 769 |
| S919 |       | 507 | 7 | OAR7_32708552.1  | OAR7_34234525.1    | 1525.97 | 30  |
| S919 | CON   | 4   | 7 | OAR7_32708552.1  | OAR7_32846682.1    | 138.13  | 3   |
| S919 | UNION | 4   | 7 | OAR7_31134779.1  | OAR7_72973471.1    | 41838.7 | 783 |
| S925 |       | 45  | 6 | OAR6_96497355.1  | OAR6_107118527.1   | 10621.2 | 208 |
| S925 |       | 844 | 6 | OAR6_101563461.1 | OAR6_104016857_X.1 | 2453.4  | 49  |
| S925 |       | 507 | 6 | OAR6_103085812.1 | OAR6_104904339.1   | 1818.53 | 32  |
| S925 |       | 123 | 6 | s52502.1         | OAR6_105661466.1   | 2254.54 | 35  |
| S925 | CON   | 4   | 6 | s52502.1         | OAR6_104016857_X.1 | 609.929 | 6   |
| S925 | UNION | 4   | 6 | OAR6_96497355.1  | OAR6_107118527.1   | 10621.2 | 208 |
| S930 |       | 140 | 6 | s69231.1         | OAR6_79639233.1    | 3393.23 | 59  |
| S930 |       | 507 | 6 | OAR6_74631720.1  | OAR6_76321832.1    | 1690.11 | 34  |



|      |       |     |   |                   |                  |         |     |
|------|-------|-----|---|-------------------|------------------|---------|-----|
| S930 |       | 556 | 6 | OAR6_74224903.1   | OAR6_76377079.1  | 2152.18 | 45  |
| S930 |       | 627 | 6 | OAR6_66400799.1   | OAR6_90538374.1  | 24137.6 | 431 |
| S930 | CON   | 4   | 6 | s69231.1          | OAR6_76321832.1  | 75.832  | 3   |
| S930 | UNION | 4   | 6 | OAR6_66400799.1   | OAR6_90538374.1  | 24137.6 | 431 |
| S931 |       | 844 | 6 | OAR6_66669683.1   | OAR6_69415746.1  | 2746.06 | 46  |
| S931 |       | 627 | 6 | OAR6_66400799.1   | OAR6_90538374.1  | 24137.6 | 431 |
| S931 |       | 90  | 6 | OAR6_67781585.1   | s33521.1         | 4904.72 | 95  |
| S931 |       | 702 | 6 | OAR6_68249537.1   | OAR6_70866677.1  | 2617.14 | 47  |
| S931 | CON   | 4   | 6 | OAR6_68249537.1   | OAR6_69415746.1  | 1166.21 | 17  |
| S931 | UNION | 4   | 6 | OAR6_66400799.1   | OAR6_90538374.1  | 24137.6 | 431 |
| S932 |       | 123 | 6 | OAR6_62227590.1   | OAR6_64593905.1  | 2366.32 | 47  |
| S932 |       | 40  | 6 | OAR6_62471770.1   | OAR6_65237136.1  | 2765.37 | 57  |
| S932 |       | 29  | 6 | OAR6_63553726_X.1 | OAR6_65237136.1  | 1683.41 | 37  |
| S932 |       | 606 | 6 | OAR6_64284257.1   | OAR6_65763661.1  | 1479.4  | 31  |
| S932 | CON   | 4   | 6 | OAR6_64284257.1   | OAR6_64593905.1  | 309.648 | 10  |
| S932 | UNION | 4   | 6 | OAR6_62227590.1   | OAR6_65763661.1  | 3536.07 | 68  |
| S933 |       | 629 | 6 | OAR6_58103750.1   | OAR6_60012668.1  | 1908.92 | 31  |
| S933 |       | 61  | 6 | OAR6_57881110.1   | OAR6_62074943.1  | 4193.83 | 74  |
| S933 |       | 29  | 6 | OAR6_55784046.1   | OAR6_58211072.1  | 2427.03 | 48  |
| S933 |       | 79  | 6 | OAR6_51660421.1   | s21191.1         | 10134.5 | 185 |
| S933 | CON   | 4   | 6 | OAR6_58103750.1   | OAR6_58211072.1  | 107.322 | 3   |
| S933 | UNION | 4   | 6 | OAR6_51660421.1   | OAR6_62074943.1  | 10414.5 | 191 |
| S935 |       | 61  | 6 | OAR6_36486409_X.1 | s43499.1         | 3721.22 | 57  |
| S935 |       | 152 | 6 | OAR6_35293995.1   | OAR6_38284795.1  | 2990.8  | 55  |
| S935 |       | 702 | 6 | OAR6_6278702.1    | OAR6_45273992.1  | 38995.3 | 741 |
| S935 |       | 140 | 6 | s73122.1          | OAR6_49463357.1  | 26607.7 | 513 |
| S935 | CON   | 4   | 6 | OAR6_36486409_X.1 | OAR6_38284795.1  | 1798.38 | 31  |
| S935 | UNION | 4   | 6 | OAR6_6278702.1    | OAR6_49463357.1  | 43184.7 | 833 |
| S941 |       | 702 | 6 | OAR6_6278702.1    | OAR6_45273992.1  | 38995.3 | 741 |
| S941 |       | 140 | 6 | s73122.1          | OAR6_49463357.1  | 26607.7 | 513 |
| S941 |       | 123 | 6 | s65803.1          | OAR6_35548649.1  | 7909.9  | 153 |
| S941 |       | 152 | 6 | OAR6_35293995.1   | OAR6_38284795.1  | 2990.8  | 55  |
| S941 | CON   | 4   | 6 | OAR6_35293995.1   | OAR6_35548649.1  | 254.654 | 6   |
| S941 | UNION | 4   | 6 | OAR6_6278702.1    | OAR6_49463357.1  | 43184.7 | 833 |
| S942 |       | 79  | 6 | s40472.1          | s30534.1         | 2475.33 | 38  |
| S942 |       | 507 | 6 | OAR6_4458962.1    | OAR6_6482986_X.1 | 2024.03 | 38  |
| S942 |       | 152 | 6 | OAR6_4458962.1    | OAR6_6157042.1   | 1698.08 | 30  |
| S942 |       | 90  | 6 | OAR6_4458962.1    | s44871.1         | 4179.72 | 70  |
| S942 | CON   | 4   | 6 | s40472.1          | OAR6_6157042.1   | 125.211 | 2   |
| S942 | UNION | 4   | 6 | OAR6_4458962.1    | s44871.1         | 4179.72 | 70  |
| S943 |       | 152 | 5 | OAR5_92367367_X.1 | OAR5_94123834.1  | 1756.47 | 38  |
| S943 |       | 606 | 5 | OAR5_92205253.1   | OAR5_94598485.1  | 2393.23 | 53  |
| S943 |       | 702 | 5 | OAR5_77977258.1   | OAR5_100127181.1 | 22149.9 | 428 |
| S943 |       | 627 | 5 | s09048.1          | OAR5_100090515.1 | 6457.02 | 134 |
| S943 | CON   | 4   | 5 | s09048.1          | OAR5_94123834.1  | 490.339 | 11  |
| S943 | UNION | 4   | 5 | OAR5_77977258.1   | OAR5_100127181.1 | 22149.9 | 428 |
| S944 |       | 152 | 5 | OAR5_92367367_X.1 | OAR5_94123834.1  | 1756.47 | 38  |

|      |       |     |   |                   |                  |         |     |
|------|-------|-----|---|-------------------|------------------|---------|-----|
| S944 |       | 606 | 5 | OAR5_92205253.1   | OAR5_94598485.1  | 2393.23 | 53  |
| S944 |       | 140 | 5 | DU246484_173.1    | OAR5_93172312.1  | 2645.81 | 43  |
| S944 |       | 702 | 5 | OAR5_77977258.1   | OAR5_100127181.1 | 22149.9 | 428 |
| S944 | CON   | 4   | 5 | OAR5_92367367_X.1 | OAR5_93172312.1  | 804.944 | 18  |
| S944 | UNION | 4   | 5 | OAR5_77977258.1   | OAR5_100127181.1 | 22149.9 | 428 |
| S967 |       | 702 | 5 | OAR5_77977258.1   | OAR5_100127181.1 | 22149.9 | 428 |
| S967 |       | 40  | 5 | s51628.1          | OAR5_91610742.1  | 2115.86 | 31  |
| S967 |       | 123 | 5 | OAR5_89563589.1   | OAR5_91733625.1  | 2170.04 | 31  |
| S967 |       | 140 | 5 | DU246484_173.1    | OAR5_93172312.1  | 2645.81 | 43  |
| S967 | CON   | 4   | 5 | DU246484_173.1    | OAR5_91610742.1  | 1084.24 | 11  |
| S967 | UNION | 4   | 5 | OAR5_77977258.1   | OAR5_100127181.1 | 22149.9 | 428 |
| S968 |       | 702 | 5 | OAR5_77977258.1   | OAR5_100127181.1 | 22149.9 | 428 |
| S968 |       | 27  | 5 | OAR5_73707380.1   | OAR5_78020462.1  | 4313.08 | 92  |
| S968 |       | 606 | 5 | OAR5_70256606.1   | OAR5_82901477.1  | 12644.9 | 245 |
| S968 |       | 629 | 5 | OAR5_76098058.1   | OAR5_81196810.1  | 5098.75 | 99  |
| S968 | CON   | 4   | 5 | OAR5_77977258.1   | OAR5_78020462.1  | 43.204  | 2   |
| S968 | UNION | 4   | 5 | OAR5_70256606.1   | OAR5_100127181.1 | 29870.6 | 580 |
| S972 |       | 627 | 5 | OAR5_69570106.1   | OAR5_71156734.1  | 1586.63 | 30  |
| S972 |       | 126 | 5 | s52618.1          | OAR5_72565538.1  | 7244.72 | 139 |
| S972 |       | 629 | 5 | OAR5_57983508.1   | OAR5_71824766.1  | 13841.3 | 230 |
| S972 |       | 606 | 5 | OAR5_70256606.1   | OAR5_82901477.1  | 12644.9 | 245 |
| S972 | CON   | 4   | 5 | OAR5_70256606.1   | OAR5_71156734.1  | 900.128 | 19  |
| S972 | UNION | 4   | 5 | OAR5_57983508.1   | OAR5_82901477.1  | 24918   | 441 |
| S973 |       | 507 | 5 | OAR5_49532219.1   | s07760.1         | 3268.6  | 64  |
| S973 |       | 152 | 5 | s12940.1          | OAR5_61924626.1  | 14110.5 | 253 |
| S973 |       | 801 | 5 | OAR5_47774570.1   | s54250.1         | 7553.49 | 151 |
| S973 |       | 157 | 5 | s37412.1          | s21988.1         | 1297.99 | 34  |
| S973 | CON   | 4   | 5 | OAR5_49532219.1   | s21988.1         | 240.912 | 7   |
| S973 | UNION | 4   | 5 | OAR5_47774570.1   | OAR5_61924626.1  | 14150.1 | 254 |
| S974 |       | 152 | 5 | s23065.1          | OAR5_47736089.1  | 2786.7  | 45  |
| S974 |       | 627 | 5 | s71007.1          | s04774.1         | 5048.15 | 85  |
| S974 |       | 629 | 5 | s71007.1          | s04774.1         | 5048.15 | 85  |
| S974 |       | 45  | 5 | s71007.1          | s06750.1         | 4481.91 | 70  |
| S974 | CON   | 4   | 5 | s23065.1          | OAR5_47736089.1  | 2786.7  | 45  |
| S974 | UNION | 4   | 5 | s71007.1          | s04774.1         | 5048.15 | 85  |
| S975 |       | 616 | 5 | OAR5_27410982.1   | OAR5_29375239.1  | 1964.26 | 41  |
| S975 |       | 140 | 5 | s53281.1          | OAR5_27751113.1  | 1632.65 | 36  |
| S975 |       | 507 | 5 | s16895.1          | s49973.1         | 1857.27 | 42  |
| S975 |       | 27  | 5 | s51103.1          | OAR5_28164690.1  | 1648.86 | 34  |
| S975 | CON   | 4   | 5 | OAR5_27410982.1   | OAR5_27751113.1  | 340.131 | 7   |
| S975 | UNION | 4   | 5 | s16895.1          | OAR5_29375239.1  | 3412.13 | 74  |
| S976 |       | 629 | 5 | OAR5_17235395.1   | s17924.1         | 1949.73 | 32  |
| S976 |       | 801 | 5 | s44978.1          | OAR5_17455332.1  | 1644.58 | 33  |
| S976 |       | 61  | 5 | OAR5_12770106.1   | OAR5_22276454.1  | 9506.35 | 152 |
| S976 |       | 45  | 5 | OAR5_10884558.1   | s06935.1         | 11513.7 | 188 |
| S976 | CON   | 4   | 5 | OAR5_17235395.1   | OAR5_17455332.1  | 219.937 | 2   |
| S976 | UNION | 4   | 5 | OAR5_10884558.1   | s06935.1         | 11513.7 | 188 |

|       |       |     |   |                    |                  |         |     |
|-------|-------|-----|---|--------------------|------------------|---------|-----|
| S984  |       | 45  | 5 | OAR5_10884558.1    | s06935.1         | 11513.7 | 188 |
| S984  |       | 40  | 5 | s57898.1           | s26328.1         | 2181.44 | 31  |
| S984  |       | 61  | 5 | OAR5_12770106.1    | OAR5_22276454.1  | 9506.35 | 152 |
| S984  |       | 29  | 5 | s08877.1           | s18219.1         | 2077.76 | 31  |
| S984  | CON   | 4   | 5 | s08877.1           | s26328.1         | 1535.21 | 21  |
| S984  | UNION | 4   | 5 | OAR5_10884558.1    | s06935.1         | 11513.7 | 188 |
| S985  |       | 90  | 4 | s49126.1           | OAR4_121393593.1 | 2251.08 | 32  |
| S985  |       | 844 | 4 | s49126.1           | OAR4_121393593.1 | 2251.08 | 32  |
| S985  |       | 507 | 4 | OAR4_117802819.1   | OAR4_121393593.1 | 3590.77 | 62  |
| S985  |       | 616 | 4 | s09629.1           | s64459.1         | 4989.46 | 82  |
| S985  | CON   | 4   | 4 | s09629.1           | OAR4_121393593.1 | 2237.47 | 31  |
| S985  | UNION | 4   | 4 | OAR4_117802819.1   | s64459.1         | 6342.77 | 113 |
| S992  |       | 126 | 4 | s31432.1           | OAR4_116953207.1 | 2171.45 | 50  |
| S992  |       | 27  | 4 | s16058.1           | OAR4_115829682.1 | 8547.19 | 152 |
| S992  |       | 844 | 4 | OAR4_115675953.1   | s65922.1         | 1382.7  | 35  |
| S992  |       | 507 | 4 | OAR4_111473821.1   | OAR4_115829682.1 | 4355.86 | 71  |
| S992  | CON   | 4   | 4 | OAR4_115675953.1   | OAR4_115829682.1 | 153.729 | 3   |
| S992  | UNION | 4   | 4 | s16058.1           | s65922.1         | 9776.17 | 184 |
| S995  |       | 627 | 4 | OAR4_83576387.1    | OAR4_89216253.1  | 5639.87 | 112 |
| S995  |       | 507 | 4 | OAR4_76898220.1    | OAR4_83911244.1  | 7013.02 | 135 |
| S995  |       | 702 | 4 | s58367.1           | OAR4_85483475.1  | 25992.5 | 514 |
| S995  |       | 61  | 4 | OAR4_83231101.1    | s24964.1         | 1857.88 | 38  |
| S995  | CON   | 4   | 4 | OAR4_83576387.1    | OAR4_83911244.1  | 334.857 | 6   |
| S995  | UNION | 4   | 4 | s58367.1           | OAR4_89216253.1  | 29725.3 | 589 |
| S996  |       | 606 | 4 | s58039.1           | s49979.1         | 1493.77 | 36  |
| S996  |       | 507 | 4 | OAR4_76898220.1    | OAR4_83911244.1  | 7013.02 | 135 |
| S996  |       | 702 | 4 | s58367.1           | OAR4_85483475.1  | 25992.5 | 514 |
| S996  |       | 627 | 4 | s56367.1           | OAR4_80229268.1  | 3866.18 | 75  |
| S996  | CON   | 4   | 4 | s58039.1           | OAR4_80229268.1  | 429.749 | 9   |
| S996  | UNION | 4   | 4 | s58367.1           | OAR4_85483475.1  | 25992.5 | 514 |
| S997  |       | 702 | 4 | s58367.1           | OAR4_85483475.1  | 25992.5 | 514 |
| S997  |       | 627 | 4 | OAR4_70656759_X.1  | s13803.1         | 5088.69 | 101 |
| S997  |       | 616 | 4 | OAR4_72367529.1    | OAR4_78991289.1  | 6623.76 | 132 |
| S997  |       | 29  | 4 | OAR4_74705318.1    | OAR4_78216552.1  | 3511.23 | 72  |
| S997  | CON   | 4   | 4 | OAR4_74705318.1    | s13803.1         | 1040.13 | 22  |
| S997  | UNION | 4   | 4 | s58367.1           | OAR4_85483475.1  | 25992.5 | 514 |
| S1000 |       | 702 | 4 | s58367.1           | OAR4_85483475.1  | 25992.5 | 514 |
| S1000 |       | 616 | 4 | OAR4_63468173.1    | s75934.1         | 1686.15 | 32  |
| S1000 |       | 152 | 4 | OAR4_63706459.1    | OAR4_69891218.1  | 6184.76 | 115 |
| S1000 |       | 606 | 4 | OAR4_64327263.1    | OAR4_67621451.1  | 3294.19 | 61  |
| S1000 | CON   | 4   | 4 | OAR4_64327263.1    | s75934.1         | 827.056 | 15  |
| S1000 | UNION | 4   | 4 | s58367.1           | OAR4_85483475.1  | 25992.5 | 514 |
| S1001 |       | 606 | 4 | OAR4_15211722_X.1  | OAR4_24841202.1  | 9629.48 | 193 |
| S1001 |       | 702 | 4 | OARUn.284_293028.1 | OAR4_24251309.1  | 24251.3 | 470 |
| S1001 |       | 126 | 4 | s29747.1           | OAR4_16701883.1  | 4730.1  | 103 |
| S1001 |       | 29  | 4 | s70520.1           | OAR4_21300620.1  | 4951.68 | 88  |
| S1001 | CON   | 4   | 4 | s70520.1           | OAR4_16701883.1  | 352.943 | 9   |
| S1001 | UNION | 4   | 4 | OARUn.284_293028.1 | OAR4_24841202.1  | 24841.2 | 483 |

|       |       |     |   |                  |                    |         |     |
|-------|-------|-----|---|------------------|--------------------|---------|-----|
| S1008 |       | 29  | 3 | OAR3_210514349.1 | s62716.1           | 4058.72 | 71  |
| S1008 |       | 606 | 3 | OAR3_208666709.1 | s05793.1           | 2048.02 | 40  |
| S1008 |       | 507 | 3 | OAR3_179244393.1 | OAR3_211362922_X.1 | 32118.5 | 604 |
| S1008 |       | 616 | 3 | OAR3_209072421.1 | OAR3_222052522.1   | 12980.1 | 230 |
| S1008 | CON   | 4   | 3 | OAR3_210514349.1 | s05793.1           | 200.379 | 5   |
| S1008 | UNION | 4   | 3 | OAR3_179244393.1 | OAR3_222052522.1   | 42808.1 | 792 |
|       |       |     |   |                  |                    |         |     |
| S1011 |       | 507 | 3 | OAR3_179244393.1 | OAR3_211362922_X.1 | 32118.5 | 604 |
| S1011 |       | 157 | 3 | OAR3_206856083.1 | OAR3_209162669.1   | 2306.59 | 49  |
| S1011 |       | 606 | 3 | OAR3_208666709.1 | s05793.1           | 2048.02 | 40  |
| S1011 |       | 616 | 3 | OAR3_209072421.1 | OAR3_222052522.1   | 12980.1 | 230 |
| S1011 | CON   | 4   | 3 | OAR3_209072421.1 | OAR3_209162669.1   | 90.248  | 2   |
| S1011 | UNION | 4   | 3 | OAR3_179244393.1 | OAR3_222052522.1   | 42808.1 | 792 |
|       |       |     |   |                  |                    |         |     |
| S1012 |       | 507 | 3 | OAR3_179244393.1 | OAR3_211362922_X.1 | 32118.5 | 604 |
| S1012 |       | 123 | 3 | s09050.1         | OAR3_202943170.1   | 11054.8 | 191 |
| S1012 |       | 702 | 3 | OAR3_196157112.1 | OAR3_199132095.1   | 2974.98 | 56  |
| S1012 |       | 157 | 3 | OAR3_197414907.1 | OAR3_199052614.1   | 1637.71 | 31  |
| S1012 | CON   | 4   | 3 | OAR3_197414907.1 | OAR3_199052614.1   | 1637.71 | 31  |
| S1012 | UNION | 4   | 3 | OAR3_179244393.1 | OAR3_211362922_X.1 | 32118.5 | 604 |
|       |       |     |   |                  |                    |         |     |
| S1014 |       | 507 | 3 | OAR3_179244393.1 | OAR3_211362922_X.1 | 32118.5 | 604 |
| S1014 |       | 123 | 3 | s09050.1         | OAR3_202943170.1   | 11054.8 | 191 |
| S1014 |       | 140 | 3 | s01490.1         | s39041.1           | 1666.11 | 31  |
| S1014 |       | 702 | 3 | OAR3_196157112.1 | OAR3_199132095.1   | 2974.98 | 56  |
| S1014 | CON   | 4   | 3 | OAR3_196157112.1 | s39041.1           | 151.885 | 4   |
| S1014 | UNION | 4   | 3 | OAR3_179244393.1 | OAR3_211362922_X.1 | 32118.5 | 604 |
|       |       |     |   |                  |                    |         |     |
| S1015 |       | 123 | 3 | s09050.1         | OAR3_202943170.1   | 11054.8 | 191 |
| S1015 |       | 702 | 3 | OAR3_190128314.1 | OAR3_194730311.1   | 4602    | 79  |
| S1015 |       | 507 | 3 | OAR3_179244393.1 | OAR3_211362922_X.1 | 32118.5 | 604 |
| S1015 |       | 140 | 3 | s01490.1         | s39041.1           | 1666.11 | 31  |
| S1015 | CON   | 4   | 3 | s01490.1         | OAR3_194730311.1   | 87.424  | 2   |
| S1015 | UNION | 4   | 3 | OAR3_179244393.1 | OAR3_211362922_X.1 | 32118.5 | 604 |
|       |       |     |   |                  |                    |         |     |
| S1016 |       | 140 | 3 | OAR3_188369387.1 | s01421.1           | 2146.03 | 47  |
| S1016 |       | 123 | 3 | s55427.1         | s32545.1           | 2793.06 | 53  |
| S1016 |       | 702 | 3 | OAR3_178121896.1 | s16918.1           | 11927   | 230 |
| S1016 |       | 507 | 3 | OAR3_179244393.1 | OAR3_211362922_X.1 | 32118.5 | 604 |
| S1016 | CON   | 4   | 3 | OAR3_188369387.1 | s32545.1           | 338.408 | 10  |
| S1016 | UNION | 4   | 3 | OAR3_178121896.1 | OAR3_211362922_X.1 | 33241   | 624 |
|       |       |     |   |                  |                    |         |     |
| S1017 |       | 627 | 3 | OAR3_155236610.1 | s75549.1           | 19415.4 | 375 |
| S1017 |       | 629 | 3 | OAR3_155236610.1 | s75549.1           | 19415.4 | 375 |
| S1017 |       | 126 | 3 | OAR3_164029380.1 | s12237.1           | 3624.48 | 67  |
| S1017 |       | 61  | 3 | OAR3_164422954.1 | s12237.1           | 3230.91 | 60  |
| S1017 | CON   | 4   | 3 | OAR3_164422954.1 | s12237.1           | 3230.91 | 60  |
| S1017 | UNION | 4   | 3 | OAR3_155236610.1 | s75549.1           | 19415.4 | 375 |
|       |       |     |   |                  |                    |         |     |
| S1018 |       | 702 | 3 | OAR3_151694139.1 | s22496.1           | 2159.1  | 45  |
| S1018 |       | 507 | 3 | OAR3_151463131.1 | s47510.1           | 2199.78 | 44  |
| S1018 |       | 61  | 3 | OAR3_149613458.1 | OAR3_152083446.1   | 2469.99 | 51  |
| S1018 |       | 90  | 3 | OAR3_149080267.1 | OAR3_151694139.1   | 2613.87 | 57  |
| S1018 | CON   | 4   | 3 | OAR3_151694139.1 | OAR3_151694139.1   | 0       | 1   |

|       |       |     |   |                   |                  |         |      |
|-------|-------|-----|---|-------------------|------------------|---------|------|
| S1018 | UNION | 4   | 3 | OAR3_149080267.1  | s22496.1         | 4772.97 | 101  |
| S1019 |       | 140 | 3 | OAR3_118738718.1  | OAR3_121938058.1 | 3199.34 | 65   |
| S1019 |       | 123 | 3 | OAR3_118383093.1  | OAR3_120348297.1 | 1965.2  | 39   |
| S1019 |       | 152 | 3 | OAR3_115651452.1  | s09346.1         | 3379.64 | 69   |
| S1019 |       | 629 | 3 | OAR3_112096089.1  | OAR3_121762751.1 | 9666.66 | 172  |
| S1019 | CON   | 4   | 3 | OAR3_118738718.1  | s09346.1         | 292.373 | 6    |
| S1019 | UNION | 4   | 3 | OAR3_112096089.1  | OAR3_121938058.1 | 9841.97 | 175  |
| S1022 |       | 123 | 3 | OAR3_118383093.1  | OAR3_120348297.1 | 1965.2  | 39   |
| S1022 |       | 152 | 3 | OAR3_115651452.1  | s09346.1         | 3379.64 | 69   |
| S1022 |       | 616 | 3 | OAR3_115651452.1  | OAR3_118690316.1 | 3038.86 | 63   |
| S1022 |       | 629 | 3 | OAR3_112096089.1  | OAR3_121762751.1 | 9666.66 | 172  |
| S1022 | CON   | 4   | 3 | OAR3_118383093.1  | OAR3_118690316.1 | 307.223 | 6    |
| S1022 | UNION | 4   | 3 | OAR3_112096089.1  | OAR3_121762751.1 | 9666.66 | 172  |
| S1024 |       | 123 | 3 | s26313.1          | OAR3_86263758.1  | 2301.95 | 49   |
| S1024 |       | 45  | 3 | s30085.1          | OAR3_88649034.1  | 3880.06 | 72   |
| S1024 |       | 829 | 3 | OAR3_84830738_X.1 | OAR3_87055108.1  | 2224.37 | 45   |
| S1024 |       | 140 | 3 | OAR3_84830738_X.1 | s18949.1         | 13571.1 | 269  |
| S1024 | CON   | 4   | 3 | OAR3_84830738_X.1 | OAR3_86263758.1  | 1433.02 | 28   |
| S1024 | UNION | 4   | 3 | s26313.1          | s18949.1         | 14440.1 | 290  |
| S1035 |       | 29  | 3 | OAR3_68985625.1   | OAR3_71509142.1  | 2523.52 | 46   |
| S1035 |       | 829 | 3 | OAR3_67058161.1   | OAR3_74604120.1  | 7545.96 | 148  |
| S1035 |       | 45  | 3 | OAR3_70204674.1   | s57378.1         | 2739.58 | 51   |
| S1035 |       | 157 | 3 | OAR3_70578986.1   | OAR3_76536013.1  | 5957.03 | 117  |
| S1035 | CON   | 4   | 3 | OAR3_70578986.1   | OAR3_71509142.1  | 930.156 | 17   |
| S1035 | UNION | 4   | 3 | OAR3_67058161.1   | OAR3_76536013.1  | 9477.85 | 187  |
| S1039 |       | 29  | 3 | OAR3_68985625.1   | OAR3_71509142.1  | 2523.52 | 46   |
| S1039 |       | 829 | 3 | OAR3_67058161.1   | OAR3_74604120.1  | 7545.96 | 148  |
| S1039 |       | 45  | 3 | OAR3_70204674.1   | s57378.1         | 2739.58 | 51   |
| S1039 |       | 123 | 3 | OAR3_68391345.1   | OAR3_70204674.1  | 1813.33 | 34   |
| S1039 | CON   | 4   | 3 | OAR3_70204674.1   | OAR3_70204674.1  | 0       | 1    |
| S1039 | UNION | 4   | 3 | OAR3_67058161.1   | OAR3_74604120.1  | 7545.96 | 148  |
| S1040 |       | 702 | 3 | s50340.1          | s35506.1         | 2560.33 | 53   |
| S1040 |       | 556 | 3 | s12121.1          | OAR3_62555400.1  | 2127.51 | 34   |
| S1040 |       | 45  | 3 | s45049.1          | OAR3_66317995.1  | 4167.71 | 82   |
| S1040 |       | 157 | 3 | OAR3_59779674.1   | s51327.1         | 4543.97 | 78   |
| S1040 | CON   | 4   | 3 | s50340.1          | OAR3_62555400.1  | 341.922 | 6    |
| S1040 | UNION | 4   | 3 | OAR3_59779674.1   | OAR3_66317995.1  | 6538.32 | 118  |
| S1041 |       | 627 | 3 | OAR3_35868525.1   | s49084.1         | 3139.94 | 61   |
| S1041 |       | 629 | 3 | OAR3_35868525.1   | s49084.1         | 3139.94 | 61   |
| S1041 |       | 616 | 3 | OAR3_35747405.1   | OAR3_37420977.1  | 1673.57 | 33   |
| S1041 |       | 702 | 3 | DU259120_464.1    | OAR3_59494261.1  | 59494.3 | 1111 |
| S1041 | CON   | 4   | 3 | OAR3_35868525.1   | OAR3_37420977.1  | 1552.45 | 30   |
| S1041 | UNION | 4   | 3 | DU259120_464.1    | OAR3_59494261.1  | 59494.3 | 1111 |
| S1042 |       | 606 | 3 | s11352.1          | OAR3_30766484.1  | 1487.15 | 32   |
| S1042 |       | 27  | 3 | OAR3_28398665.1   | OAR3_32271305.1  | 3872.64 | 80   |
| S1042 |       | 702 | 3 | DU259120_464.1    | OAR3_59494261.1  | 59494.3 | 1111 |
| S1042 |       | 556 | 3 | OAR3_29169436.1   | OAR3_31172991.1  | 2003.56 | 43   |

|       |       |     |   |                    |                    |         |      |
|-------|-------|-----|---|--------------------|--------------------|---------|------|
| S1042 | CON   | 4   | 3 | s11352.1           | OAR3_30766484.1    | 1487.15 | 32   |
| S1042 | UNION | 4   | 3 | DU259120_464.1     | OAR3_59494261.1    | 59494.3 | 1111 |
| S1043 |       | 27  | 3 | OAR3_28398665.1    | OAR3_32271305.1    | 3872.64 | 80   |
| S1043 |       | 61  | 3 | OAR3_27099890.1    | s60002.1           | 1720.22 | 39   |
| S1043 |       | 507 | 3 | s49768.1           | OAR3_28567790.1    | 9061.66 | 193  |
| S1043 |       | 702 | 3 | DU259120_464.1     | OAR3_59494261.1    | 59494.3 | 1111 |
| S1043 | CON   | 4   | 3 | OAR3_28398665.1    | OAR3_28567790.1    | 169.125 | 4    |
| S1043 | UNION | 4   | 3 | DU259120_464.1     | OAR3_59494261.1    | 59494.3 | 1111 |
| S1045 |       | 702 | 3 | DU259120_464.1     | OAR3_59494261.1    | 59494.3 | 1111 |
| S1045 |       | 507 | 3 | s49768.1           | OAR3_28567790.1    | 9061.66 | 193  |
| S1045 |       | 152 | 3 | OAR3_24047322.1    | OAR3_27322763.1    | 3275.44 | 68   |
| S1045 |       | 61  | 3 | OAR3_27099890.1    | s60002.1           | 1720.22 | 39   |
| S1045 | CON   | 4   | 3 | OAR3_27099890.1    | OAR3_27322763.1    | 222.873 | 5    |
| S1045 | UNION | 4   | 3 | DU259120_464.1     | OAR3_59494261.1    | 59494.3 | 1111 |
| S1048 |       | 507 | 3 | s62006.1           | s69257.1           | 1928.36 | 38   |
| S1048 |       | 629 | 3 | s03864.1           | s69257.1           | 2609.38 | 55   |
| S1048 |       | 27  | 3 | OAR3_2505765.1     | s46775.1           | 3060.4  | 58   |
| S1048 |       | 702 | 3 | DU259120_464.1     | OAR3_59494261.1    | 59494.3 | 1111 |
| S1048 | CON   | 4   | 3 | s62006.1           | s46775.1           | 1180.8  | 22   |
| S1048 | UNION | 4   | 3 | DU259120_464.1     | OAR3_59494261.1    | 59494.3 | 1111 |
| S1053 |       | 844 | 2 | OAR2_261042542.1   | s29579.1           | 2065.98 | 50   |
| S1053 |       | 507 | 2 | s28022.1           | s74961.1           | 1873.61 | 46   |
| S1053 |       | 79  | 2 | s71223.1           | s55376.1           | 1830.55 | 40   |
| S1053 |       | 702 | 2 | OAR2_252278273.1   | s29579.1           | 10830.2 | 215  |
| S1053 | CON   | 4   | 2 | OAR2_261042542.1   | s55376.1           | 380.358 | 9    |
| S1053 | UNION | 4   | 2 | OAR2_252278273.1   | s29579.1           | 10830.2 | 215  |
| S1058 |       | 627 | 2 | OAR2_257231205.1   | OAR2_260008602.1   | 2777.4  | 52   |
| S1058 |       | 629 | 2 | OAR2_257231205.1   | OAR2_260008602.1   | 2777.4  | 52   |
| S1058 |       | 123 | 2 | OAR2_255186614.1   | s38715.1           | 2347.14 | 47   |
| S1058 |       | 702 | 2 | OAR2_252278273.1   | s29579.1           | 10830.2 | 215  |
| S1058 | CON   | 4   | 2 | OAR2_257231205.1   | s38715.1           | 302.554 | 7    |
| S1058 | UNION | 4   | 2 | OAR2_252278273.1   | s29579.1           | 10830.2 | 215  |
| S1059 |       | 45  | 2 | s55941.1           | s46164.1           | 2104    | 34   |
| S1059 |       | 507 | 2 | OAR2_224687649.1   | s08704.1           | 6568.89 | 90   |
| S1059 |       | 616 | 2 | OAR2_229781196.1   | s00795.1           | 3081.64 | 50   |
| S1059 |       | 40  | 2 | OAR2_227627755.1   | s54339.1           | 2648.12 | 33   |
| S1059 | CON   | 4   | 2 | OAR2_229781196.1   | s54339.1           | 494.676 | 8    |
| S1059 | UNION | 4   | 2 | OAR2_224687649.1   | s00795.1           | 8175.18 | 117  |
| S1063 |       | 29  | 2 | OAR2_223862860_X.1 | OAR2_226636096.1   | 2773.24 | 53   |
| S1063 |       | 140 | 2 | OAR2_221746917.1   | OAR2_225636672.1   | 3889.76 | 77   |
| S1063 |       | 702 | 2 | OAR2_212387600.1   | OAR2_223862860_X.1 | 11475.3 | 237  |
| S1063 |       | 79  | 2 | OAR2_222545307.1   | OAR2_224219290.1   | 1673.98 | 33   |
| S1063 | CON   | 4   | 2 | OAR2_223862860_X.1 | OAR2_223862860_X.1 | 0       | 1    |
| S1063 | UNION | 4   | 2 | OAR2_212387600.1   | OAR2_226636096.1   | 14248.5 | 289  |
| S1067 |       | 556 | 2 | OAR2_194667510.1   | OAR2_196843824.1   | 2176.31 | 36   |
| S1067 |       | 627 | 2 | OAR2_192100658.1   | OAR2_194917758.1   | 2817.1  | 55   |
| S1067 |       | 140 | 2 | OAR2_191308232.1   | OAR2_203356427.1   | 12048.2 | 217  |

|       |       |     |   |                  |                   |         |     |
|-------|-------|-----|---|------------------|-------------------|---------|-----|
| S1067 |       | 79  | 2 | OAR2_181847398.1 | s12968.1          | 13971.1 | 260 |
| S1067 | CON   | 4   | 2 | OAR2_194667510.1 | OAR2_194917758.1  | 250.248 | 6   |
| S1067 | UNION | 4   | 2 | OAR2_181847398.1 | OAR2_203356427.1  | 21509   | 395 |
| S1068 |       | 507 | 2 | OAR2_193075643.1 | OAR2_194594406.1  | 1518.76 | 30  |
| S1068 |       | 627 | 2 | OAR2_192100658.1 | OAR2_194917758.1  | 2817.1  | 55  |
| S1068 |       | 79  | 2 | OAR2_181847398.1 | s12968.1          | 13971.1 | 260 |
| S1068 |       | 140 | 2 | OAR2_191308232.1 | OAR2_203356427.1  | 12048.2 | 217 |
| S1068 | CON   | 4   | 2 | OAR2_193075643.1 | OAR2_194594406.1  | 1518.76 | 30  |
| S1068 | UNION | 4   | 2 | OAR2_181847398.1 | OAR2_203356427.1  | 21509   | 395 |
| S1073 |       | 140 | 2 | OAR2_187991993.1 | OAR2_190420269.1  | 2428.28 | 49  |
| S1073 |       | 152 | 2 | s61174.1         | s26570.1          | 7267.15 | 138 |
| S1073 |       | 90  | 2 | OAR2_181512709.1 | OAR2_190616592.1  | 9103.88 | 175 |
| S1073 |       | 79  | 2 | OAR2_181847398.1 | s12968.1          | 13971.1 | 260 |
| S1073 | CON   | 4   | 2 | OAR2_187991993.1 | s26570.1          | 347.543 | 6   |
| S1073 | UNION | 4   | 2 | s61174.1         | s12968.1          | 14746.1 | 278 |
| S1076 |       | 627 | 2 | OAR2_155425432.1 | OAR2_160296103.1  | 4870.67 | 100 |
| S1076 |       | 606 | 2 | s01065.1         | s72813.1          | 6497.5  | 138 |
| S1076 |       | 702 | 2 | s54108.1         | OAR2_162167662.1  | 23623.2 | 482 |
| S1076 |       | 45  | 2 | OAR2_154645235.1 | OAR2_156250273.1  | 1605.04 | 39  |
| S1076 | CON   | 4   | 2 | OAR2_155425432.1 | OAR2_156250273.1  | 824.841 | 18  |
| S1076 | UNION | 4   | 2 | s54108.1         | OAR2_162167662.1  | 23623.2 | 482 |
| S1077 |       | 123 | 2 | OAR2_93160890.1  | s59269.1          | 3203.27 | 47  |
| S1077 |       | 49  | 2 | OAR2_90239503.1  | OAR2_96436987_X.1 | 6197.48 | 106 |
| S1077 |       | 606 | 2 | s14873.1         | OAR2_96066817.1   | 6724.02 | 118 |
| S1077 |       | 79  | 2 | OAR2_93935779.1  | OAR2_96537414.1   | 2601.64 | 32  |
| S1077 | CON   | 4   | 2 | OAR2_93935779.1  | OAR2_96066817.1   | 2131.04 | 26  |
| S1077 | UNION | 4   | 2 | s14873.1         | OAR2_96537414.1   | 7194.62 | 124 |
| S1078 |       | 49  | 2 | OAR2_90239503.1  | OAR2_96436987_X.1 | 6197.48 | 106 |
| S1078 |       | 90  | 2 | OAR2_90239503.1  | s66693.1          | 3509.49 | 72  |
| S1078 |       | 123 | 2 | OAR2_93160890.1  | s59269.1          | 3203.27 | 47  |
| S1078 |       | 606 | 2 | s14873.1         | OAR2_96066817.1   | 6724.02 | 118 |
| S1078 | CON   | 4   | 2 | OAR2_93160890.1  | s66693.1          | 588.102 | 15  |
| S1078 | UNION | 4   | 2 | s14873.1         | OAR2_96436987_X.1 | 7094.19 | 123 |
| S1079 |       | 507 | 2 | s37403.1         | s36747.1          | 4416.51 | 74  |
| S1079 |       | 79  | 2 | OAR2_49013850.1  | s36747.1          | 5342.23 | 88  |
| S1079 |       | 45  | 2 | OAR2_17890079.1  | s50931.1          | 32810.2 | 566 |
| S1079 |       | 29  | 2 | s05611.1         | OAR2_55308142.1   | 7693.97 | 128 |
| S1079 | CON   | 4   | 2 | s37403.1         | s50931.1          | 760.761 | 5   |
| S1079 | UNION | 4   | 2 | OAR2_17890079.1  | OAR2_55308142.1   | 37418.1 | 649 |
| S1085 |       | 27  | 2 | OAR2_21576835.1  | s72217.1          | 1514.78 | 31  |
| S1085 |       | 45  | 2 | OAR2_17890079.1  | s50931.1          | 32810.2 | 566 |
| S1085 |       | 140 | 2 | s43106.1         | OAR2_21997773.1   | 5865.81 | 99  |
| S1085 |       | 702 | 2 | s55237.1         | OAR2_24281639.1   | 13422.7 | 255 |
| S1085 | CON   | 4   | 2 | OAR2_21576835.1  | OAR2_21997773.1   | 420.938 | 8   |
| S1085 | UNION | 4   | 2 | s55237.1         | s50931.1          | 39841.4 | 703 |
| S1086 |       | 140 | 2 | s43106.1         | OAR2_21997773.1   | 5865.81 | 99  |
| S1086 |       | 40  | 2 | OAR2_15830990.1  | s33375.1          | 2008.94 | 36  |

|       |       |     |   |                  |                  |         |     |
|-------|-------|-----|---|------------------|------------------|---------|-----|
| S1086 |       | 702 | 2 | s55237.1         | OAR2_24281639.1  | 13422.7 | 255 |
| S1086 |       | 606 | 2 | OAR2_8977613.1   | OAR2_16538077.1  | 7560.46 | 153 |
| S1086 | CON   | 4   | 2 | s43106.1         | OAR2_16538077.1  | 406.112 | 8   |
| S1086 | UNION | 4   | 2 | OAR2_8977613.1   | OAR2_24281639.1  | 15304   | 294 |
| S1089 |       | 629 | 2 | OAR2_9828035.1   | OAR2_12469561.1  | 2641.53 | 51  |
| S1089 |       | 627 | 2 | s00957.1         | OAR2_12469561.1  | 3947.37 | 80  |
| S1089 |       | 702 | 2 | s55237.1         | OAR2_24281639.1  | 13422.7 | 255 |
| S1089 |       | 606 | 2 | OAR2_8977613.1   | OAR2_16538077.1  | 7560.46 | 153 |
| S1089 | CON   | 4   | 2 | s55237.1         | OAR2_12469561.1  | 1610.6  | 30  |
| S1089 | UNION | 4   | 2 | s00957.1         | OAR2_24281639.1  | 15759.4 | 305 |
| S1098 |       | 606 | 1 | OAR1_268122939.1 | s72986.1         | 4302.03 | 61  |
| S1098 |       | 844 | 1 | s08603.1         | OAR1_268690065.1 | 1941.63 | 33  |
| S1098 |       | 507 | 1 | OAR1_266243405.1 | OAR1_270405323.1 | 4161.92 | 75  |
| S1098 |       | 801 | 1 | s09883.1         | s73870.1         | 6372.31 | 95  |
| S1098 | CON   | 4   | 1 | OAR1_268122939.1 | OAR1_268690065.1 | 567.126 | 11  |
| S1098 | UNION | 4   | 1 | OAR1_266243405.1 | s73870.1         | 6987.71 | 106 |
| S1099 |       | 556 | 1 | OAR1_256940663.1 | OAR1_259109428.1 | 2168.76 | 39  |
| S1099 |       | 844 | 1 | OAR1_256339018.1 | OAR1_260270011.1 | 3930.99 | 65  |
| S1099 |       | 126 | 1 | OAR1_253349819.1 | s70277.1         | 12807   | 217 |
| S1099 |       | 829 | 1 | OAR1_257557854.1 | s49280.1         | 5797.95 | 97  |
| S1099 | CON   | 4   | 1 | OAR1_257557854.1 | OAR1_259109428.1 | 1551.57 | 25  |
| S1099 | UNION | 4   | 1 | OAR1_253349819.1 | s70277.1         | 12807   | 217 |
| S1100 |       | 507 | 1 | OAR1_237623635.1 | OAR1_241663250.1 | 4039.61 | 56  |
| S1100 |       | 126 | 1 | s40188.1         | OAR1_241703558.1 | 8537.63 | 145 |
| S1100 |       | 79  | 1 | OAR1_235621637.1 | OAR1_242295786.1 | 6674.15 | 108 |
| S1100 |       | 606 | 1 | OAR1_236964370.1 | s30975.1         | 1929.5  | 38  |
| S1100 | CON   | 4   | 1 | OAR1_237623635.1 | s30975.1         | 1270.23 | 25  |
| S1100 | UNION | 4   | 1 | s40188.1         | OAR1_242295786.1 | 9129.86 | 158 |
| S1101 |       | 606 | 1 | OAR1_236964370.1 | s30975.1         | 1929.5  | 38  |
| S1101 |       | 507 | 1 | s33272.1         | OAR1_237198444.1 | 2871.7  | 58  |
| S1101 |       | 126 | 1 | s40188.1         | OAR1_241703558.1 | 8537.63 | 145 |
| S1101 |       | 79  | 1 | OAR1_235621637.1 | OAR1_242295786.1 | 6674.15 | 108 |
| S1101 | CON   | 4   | 1 | OAR1_236964370.1 | OAR1_237198444.1 | 234.074 | 4   |
| S1101 | UNION | 4   | 1 | s40188.1         | OAR1_242295786.1 | 9129.86 | 158 |
| S1102 |       | 79  | 1 | OAR1_235621637.1 | OAR1_242295786.1 | 6674.15 | 108 |
| S1102 |       | 829 | 1 | OAR1_219136030.1 | OAR1_236103073.1 | 16967   | 322 |
| S1102 |       | 507 | 1 | s33272.1         | OAR1_237198444.1 | 2871.7  | 58  |
| S1102 |       | 126 | 1 | s40188.1         | OAR1_241703558.1 | 8537.63 | 145 |
| S1102 | CON   | 4   | 1 | OAR1_235621637.1 | OAR1_236103073.1 | 481.436 | 11  |
| S1102 | UNION | 4   | 1 | OAR1_219136030.1 | OAR1_242295786.1 | 23159.8 | 419 |
| S1110 |       | 507 | 1 | s33272.1         | OAR1_237198444.1 | 2871.7  | 58  |
| S1110 |       | 126 | 1 | s40188.1         | OAR1_241703558.1 | 8537.63 | 145 |
| S1110 |       | 40  | 1 | OAR1_230374318.1 | OAR1_234437646.1 | 4063.33 | 74  |
| S1110 |       | 829 | 1 | OAR1_219136030.1 | OAR1_236103073.1 | 16967   | 322 |
| S1110 | CON   | 4   | 1 | s33272.1         | OAR1_234437646.1 | 110.907 | 4   |
| S1110 | UNION | 4   | 1 | OAR1_219136030.1 | OAR1_241703558.1 | 22567.5 | 406 |
| S1116 |       | 126 | 1 | OAR1_217543314.1 | OAR1_219952416.1 | 2409.1  | 36  |



|       |       |     |   |                    |                          |         |     |
|-------|-------|-----|---|--------------------|--------------------------|---------|-----|
| S1116 |       | 616 | 1 | OAR1_215364467.1   | OAR1_219065429.1         | 3700.96 | 59  |
| S1116 |       | 702 | 1 | OAR1_201628760.1   | OAR1_224818104.1         | 23189.3 | 424 |
| S1116 |       | 629 | 1 | OAR1_214417389.1   | OAR1_233116174.1         | 18698.8 | 341 |
| S1116 | CON   | 4   | 1 | OAR1_217543314.1   | OAR1_219065429.1         | 1522.12 | 19  |
| S1116 | UNION | 4   | 1 | OAR1_201628760.1   | OAR1_233116174.1         | 31487.4 | 578 |
| S1117 |       | 61  | 1 | OAR1_214424851.1   | s12243.1                 | 2026.25 | 37  |
| S1117 |       | 629 | 1 | OAR1_214417389.1   | OAR1_233116174.1         | 18698.8 | 341 |
| S1117 |       | 702 | 1 | OAR1_201628760.1   | OAR1_224818104.1         | 23189.3 | 424 |
| S1117 |       | 616 | 1 | OAR1_215364467.1   | OAR1_219065429.1         | 3700.96 | 59  |
| S1117 | CON   | 4   | 1 | OAR1_215364467.1   | s12243.1                 | 1086.63 | 18  |
| S1117 | UNION | 4   | 1 | OAR1_201628760.1   | OAR1_233116174.1         | 31487.4 | 578 |
| S1124 |       | 702 | 1 | OAR1_201628760.1   | OAR1_224818104.1         | 23189.3 | 424 |
| S1124 |       | 45  | 1 | s68692.1           | OAR1_208344041_X.1       | 2497.93 | 43  |
| S1124 |       | 61  | 1 | OAR1_206794718.1   | OAR1_210786386.1         | 3991.67 | 81  |
| S1124 |       | 29  | 1 | OAR1_207403921.1   | OAR1_209169552_X.1       | 1765.63 | 31  |
| S1124 | CON   | 4   | 1 | OAR1_207403921.1   | OAR1_208344041_X.1       | 940.121 | 14  |
| S1124 | UNION | 4   | 1 | OAR1_201628760.1   | OAR1_224818104.1         | 23189.3 | 424 |
| S1125 |       | 61  | 1 | OAR1_206794718.1   | OAR1_210786386.1         | 3991.67 | 81  |
| S1125 |       | 629 | 1 | DU316524_436.1     | OAR1_207345817.1         | 5355.54 | 90  |
| S1125 |       | 702 | 1 | OAR1_201628760.1   | OAR1_224818104.1         | 23189.3 | 424 |
| S1125 |       | 45  | 1 | s68692.1           | OAR1_208344041_X.1       | 2497.93 | 43  |
| S1125 | CON   | 4   | 1 | OAR1_206794718.1   | OAR1_207345817.1         | 551.099 | 13  |
| S1125 | UNION | 4   | 1 | OAR1_201628760.1   | OAR1_224818104.1         | 23189.3 | 424 |
| S1126 |       | 45  | 1 | s68692.1           | OAR1_208344041_X.1       | 2497.93 | 43  |
| S1126 |       | 507 | 1 | s71677.1           | OAR1_206274474.1         | 4131.31 | 65  |
| S1126 |       | 629 | 1 | DU316524_436.1     | OAR1_207345817.1         | 5355.54 | 90  |
| S1126 |       | 702 | 1 | OAR1_201628760.1   | OAR1_224818104.1         | 23189.3 | 424 |
| S1126 | CON   | 4   | 1 | s68692.1           | OAR1_206274474.1         | 428.364 | 7   |
| S1126 | UNION | 4   | 1 | OAR1_201628760.1   | OAR1_224818104.1         | 23189.3 | 424 |
| S1127 |       | 157 | 1 | DU287626_225.1 250 | 506CS3900283200001_442.1 | 2218.24 | 32  |
| S1127 |       | 507 | 1 | OAR1_194627962.1   | OAR1_201343673.1         | 6715.71 | 128 |
| S1127 |       | 123 | 1 | s30590.1           | OAR1_201878358.1         | 3641.45 | 75  |
| S1127 |       | 801 | 1 | OAR1_198827329.1   | s56333.1                 | 6897.16 | 121 |
| S1127 | CON   | 4   | 1 | DU287626_225.1     | OAR1_201343673.1         | 272.282 | 7   |
| S1127 | UNION | 4   | 1 | OAR1_194627962.1   | s56333.1                 | 11096.5 | 199 |
| S1133 |       | 829 | 1 | s65978.1           | OAR1_199615737.1         | 2744.25 | 51  |
| S1133 |       | 507 | 1 | OAR1_194627962.1   | OAR1_201343673.1         | 6715.71 | 128 |
| S1133 |       | 123 | 1 | s30590.1           | OAR1_201878358.1         | 3641.45 | 75  |
| S1133 |       | 801 | 1 | OAR1_198827329.1   | s56333.1                 | 6897.16 | 121 |
| S1133 | CON   | 4   | 1 | OAR1_198827329.1   | OAR1_199615737.1         | 788.408 | 14  |
| S1133 | UNION | 4   | 1 | OAR1_194627962.1   | s56333.1                 | 11096.5 | 199 |
| S1136 |       | 123 | 1 | s73461.1           | s51810.1                 | 2007.14 | 39  |
| S1136 |       | 801 | 1 | OAR1_191797121.1   | OAR1_193664187.1         | 1867.07 | 37  |
| S1136 |       | 40  | 1 | OAR1_190668511.1   | OAR1_193623565.1         | 2955.05 | 54  |
| S1136 |       | 606 | 1 | s12579.1           | OAR1_193526104.1         | 9327.73 | 173 |
| S1136 | CON   | 4   | 1 | s73461.1           | OAR1_193526104.1         | 1308.63 | 25  |
| S1136 | UNION | 4   | 1 | s12579.1           | s51810.1                 | 10026.2 | 187 |

|       |       |     |    |                  |                    |         |     |
|-------|-------|-----|----|------------------|--------------------|---------|-----|
| S1137 |       | 702 | 1  | OAR1_7717464.1   | OAR1_58938560.1    | 51221.1 | 934 |
| S1137 |       | 606 | 1  | OAR1_44090814.1  | OAR1_51307088.1    | 7216.27 | 123 |
| S1137 |       | 844 | 1  | OAR1_44241542.1  | OAR1_49456350.1    | 5214.81 | 94  |
| S1137 |       | 123 | 1  | s25087.1         | OAR1_52085279.1    | 3294.22 | 54  |
| S1137 | CON   | 4   | 1  | s25087.1         | OAR1_49456350.1    | 665.292 | 14  |
| S1137 | UNION | 4   | 1  | OAR1_7717464.1   | OAR1_58938560.1    | 51221.1 | 934 |
|       |       |     |    |                  |                    |         |     |
| S1138 |       | 61  | 1  | OAR1_32040848.1  | OAR1_37282541.1    | 5241.69 | 99  |
| S1138 |       | 79  | 1  | s75178.1         | s57223.1           | 2875.75 | 56  |
| S1138 |       | 702 | 1  | OAR1_7717464.1   | OAR1_58938560.1    | 51221.1 | 934 |
| S1138 |       | 123 | 1  | s67590.1         | s45674.1           | 11170   | 204 |
| S1138 | CON   | 4   | 1  | OAR1_32040848.1  | s57223.1           | 228.114 | 6   |
| S1138 | UNION | 4   | 1  | OAR1_7717464.1   | OAR1_58938560.1    | 51221.1 | 934 |
|       |       |     |    |                  |                    |         |     |
| S1139 |       | 61  | 1  | OAR1_4303667.1   | s49872.1           | 3986.89 | 79  |
| S1139 |       | 606 | 1  | s65509.1         | OAR1_9881817.1     | 5706.07 | 114 |
| S1139 |       | 152 | 1  | OAR1_2921089.1   | s05524.1           | 1595.06 | 31  |
| S1139 |       | 90  | 1  | OAR1_2921089.1   | s05524.1           | 1595.06 | 31  |
| S1139 | CON   | 4   | 1  | OAR1_4303667.1   | s05524.1           | 212.486 | 4   |
| S1139 | UNION | 4   | 1  | OAR1_2921089.1   | OAR1_9881817.1     | 6960.73 | 138 |
|       |       |     |    |                  |                    |         |     |
| S1140 |       | 829 | 26 | OAR26_46921474.1 | OAR26_50043613.1   | 3122.14 | 60  |
| S1140 |       | 606 | 26 | OAR26_46747403.1 | s46142.1           | 1645.34 | 32  |
| S1140 |       | 61  | 26 | s63463.1         | OAR26_46995252.1   | 7812.86 | 140 |
| S1140 | CON   | 3   | 26 | OAR26_46921474.1 | OAR26_46995252.1   | 73.778  | 3   |
| S1140 | UNION | 3   | 26 | s63463.1         | OAR26_50043613.1   | 10861.2 | 197 |
|       |       |     |    |                  |                    |         |     |
| S1146 |       | 29  | 26 | OAR26_26341151.1 | OAR26_31513764.1   | 5172.61 | 112 |
| S1146 |       | 27  | 26 | OAR26_19029894.1 | s08067.1           | 9710.75 | 157 |
| S1146 |       | 61  | 26 | OAR26_25273391.1 | s54702.1           | 1825.22 | 33  |
| S1146 | CON   | 3   | 26 | OAR26_26341151.1 | s54702.1           | 757.461 | 18  |
| S1146 | UNION | 3   | 26 | OAR26_19029894.1 | OAR26_31513764.1   | 12483.9 | 219 |
|       |       |     |    |                  |                    |         |     |
| S1147 |       | 27  | 26 | OAR26_19029894.1 | s08067.1           | 9710.75 | 157 |
| S1147 |       | 29  | 26 | OAR26_19029894.1 | OAR26_25594436.1   | 6564.54 | 94  |
| S1147 |       | 61  | 26 | OAR26_25273391.1 | s54702.1           | 1825.22 | 33  |
| S1147 | CON   | 3   | 26 | OAR26_25273391.1 | OAR26_25594436.1   | 321.045 | 2   |
| S1147 | UNION | 3   | 26 | OAR26_19029894.1 | s08067.1           | 9710.75 | 157 |
|       |       |     |    |                  |                    |         |     |
| S1148 |       | 606 | 26 | OAR26_11939982.1 | OAR26_14981321.1   | 3041.34 | 49  |
| S1148 |       | 126 | 26 | OAR26_8625199.1  | OAR26_13494685.1   | 4869.49 | 83  |
| S1148 |       | 90  | 26 | OAR26_10633898.1 | OAR26_12884989_X.1 | 2251.09 | 33  |
| S1148 | CON   | 3   | 26 | OAR26_11939982.1 | OAR26_12884989_X.1 | 945.008 | 16  |
| S1148 | UNION | 3   | 26 | OAR26_8625199.1  | OAR26_14981321.1   | 6356.12 | 104 |
|       |       |     |    |                  |                    |         |     |
| S1149 |       | 844 | 26 | OAR26_8709366.1  | OAR26_10981172.1   | 2271.81 | 41  |
| S1149 |       | 126 | 26 | OAR26_8625199.1  | OAR26_13494685.1   | 4869.49 | 83  |
| S1149 |       | 90  | 26 | OAR26_10633898.1 | OAR26_12884989_X.1 | 2251.09 | 33  |
| S1149 | CON   | 3   | 26 | OAR26_10633898.1 | OAR26_10981172.1   | 347.274 | 4   |
| S1149 | UNION | 3   | 26 | OAR26_8625199.1  | OAR26_13494685.1   | 4869.49 | 83  |
|       |       |     |    |                  |                    |         |     |
| S1150 |       | 507 | 25 | s10320.1         | s12031.1           | 20755.8 | 401 |
| S1150 |       | 79  | 25 | s21107.1         | s10114.1           | 2215.18 | 43  |
| S1150 |       | 627 | 25 | s52797.1         | s09722.1           | 2190.12 | 43  |
| S1150 | CON   | 3   | 25 | s10320.1         | s09722.1           | 389.054 | 8   |

|       |       |     |    |                  |                  |         |     |
|-------|-------|-----|----|------------------|------------------|---------|-----|
| S1150 | UNION | 3   | 25 | s52797.1         | s12031.1         | 22556.9 | 436 |
| S1153 |       | 45  | 25 | s58408.1         | s21107.1         | 1832.56 | 31  |
| S1153 |       | 123 | 25 | OAR25_4272552.1  | OAR25_6357231.1  | 2084.68 | 37  |
| S1153 |       | 49  | 25 | OAR25_5894736.1  | OAR25_7752816.1  | 1858.08 | 35  |
| S1153 | CON   | 3   | 25 | OAR25_5894736.1  | OAR25_6357231.1  | 462.495 | 8   |
| S1153 | UNION | 3   | 25 | OAR25_4272552.1  | OAR25_7752816.1  | 3480.26 | 64  |
| S1154 |       | 123 | 25 | OAR25_4272552.1  | OAR25_6357231.1  | 2084.68 | 37  |
| S1154 |       | 90  | 25 | s12866.1         | s21472.1         | 4810.44 | 79  |
| S1154 |       | 606 | 25 | OAR25_3074074.1  | s75010.1         | 2248.45 | 30  |
| S1154 | CON   | 3   | 25 | OAR25_4272552.1  | s21472.1         | 537.884 | 13  |
| S1154 | UNION | 3   | 25 | s12866.1         | OAR25_6357231.1  | 6357.23 | 103 |
| S1155 |       | 152 | 24 | s59335.1         | s03728.1         | 3687.79 | 56  |
| S1155 |       | 801 | 24 | DU442221_261.1   | OAR24_39340682.1 | 2923.64 | 44  |
| S1155 |       | 79  | 24 | OAR24_37150973.1 | s52435.1         | 2732.57 | 31  |
| S1155 | CON   | 3   | 24 | OAR24_37150973.1 | s03728.1         | 1912.12 | 21  |
| S1155 | UNION | 3   | 24 | s59335.1         | s52435.1         | 4508.24 | 66  |
| S1174 |       | 844 | 24 | OAR24_27265846.1 | s16047.1         | 2492.21 | 39  |
| S1174 |       | 801 | 24 | OAR24_26497561.1 | OAR24_30209224.1 | 3711.66 | 59  |
| S1174 |       | 45  | 24 | OAR24_25044819.1 | s31442.1         | 2930.96 | 39  |
| S1174 | CON   | 3   | 24 | OAR24_27265846.1 | s31442.1         | 709.929 | 11  |
| S1174 | UNION | 3   | 24 | OAR24_25044819.1 | OAR24_30209224.1 | 5164.4  | 75  |
| S1179 |       | 140 | 24 | s62631.1         | s39918.1         | 2861.66 | 39  |
| S1179 |       | 90  | 24 | DU452167_477.1   | s12637.1         | 3545.74 | 51  |
| S1179 |       | 45  | 24 | OAR24_25044819.1 | s31442.1         | 2930.96 | 39  |
| S1179 | CON   | 3   | 24 | OAR24_25044819.1 | s12637.1         | 959.86  | 12  |
| S1179 | UNION | 3   | 24 | DU452167_477.1   | s31442.1         | 5516.83 | 78  |
| S1183 |       | 140 | 24 | s62631.1         | s39918.1         | 2861.66 | 39  |
| S1183 |       | 90  | 24 | DU452167_477.1   | s12637.1         | 3545.74 | 51  |
| S1183 |       | 29  | 24 | OAR24_20737428.1 | OAR24_24557331.1 | 3819.9  | 58  |
| S1183 | CON   | 3   | 24 | s62631.1         | OAR24_24557331.1 | 1354.18 | 20  |
| S1183 | UNION | 3   | 24 | OAR24_20737428.1 | s39918.1         | 5327.38 | 77  |
| S1184 |       | 27  | 23 | s58136.1         | OAR23_60124720.1 | 9675.72 | 139 |
| S1184 |       | 29  | 23 | s58136.1         | OAR23_60124720.1 | 9675.72 | 139 |
| S1184 |       | 606 | 23 | OAR23_47138977.1 | s72429.1         | 3767.44 | 67  |
| S1184 | CON   | 3   | 23 | s58136.1         | s72429.1         | 457.415 | 7   |
| S1184 | UNION | 3   | 23 | OAR23_47138977.1 | OAR23_60124720.1 | 12985.7 | 199 |
| S1191 |       | 29  | 23 | s58159.1         | OAR23_31443579.1 | 5396.2  | 77  |
| S1191 |       | 79  | 23 | OAR23_25154247.1 | OAR23_31443579.1 | 6289.33 | 95  |
| S1191 |       | 61  | 23 | OAR23_25624860.1 | s11742.1         | 2147.4  | 31  |
| S1191 | CON   | 3   | 23 | s58159.1         | s11742.1         | 1724.89 | 22  |
| S1191 | UNION | 3   | 23 | OAR23_25154247.1 | OAR23_31443579.1 | 6289.33 | 95  |
| S1192 |       | 45  | 23 | OAR23_11847614.1 | OAR23_14163654.1 | 2316.04 | 37  |
| S1192 |       | 79  | 23 | s35508.1         | OAR23_11959774.1 | 4010.75 | 66  |
| S1192 |       | 702 | 23 | s07716.1         | OAR23_12771349.1 | 4783.72 | 80  |
| S1192 | CON   | 3   | 23 | OAR23_11847614.1 | OAR23_11959774.1 | 112.16  | 2   |
| S1192 | UNION | 3   | 23 | s35508.1         | OAR23_14163654.1 | 6214.63 | 101 |

|       |       |     |    |                  |                  |         |     |
|-------|-------|-----|----|------------------|------------------|---------|-----|
| S1194 |       | 45  | 22 | s74001.1         | s40749.1         | 2372.79 | 52  |
| S1194 |       | 616 | 22 | DU292797_377.1   | s40749.1         | 1663.13 | 36  |
| S1194 |       | 157 | 22 | OAR22_51968251.1 | s22848.1         | 1895.85 | 43  |
| S1194 | CON   | 3   | 22 | OAR22_51968251.1 | s40749.1         | 1636.94 | 35  |
| S1194 | UNION | 3   | 22 | s74001.1         | s22848.1         | 2631.7  | 60  |
| S1195 |       | 61  | 22 | OAR22_44931867.1 | s72791.1         | 1996.46 | 44  |
| S1195 |       | 123 | 22 | OAR22_44931867.1 | OAR22_46715650.1 | 1783.78 | 40  |
| S1195 |       | 507 | 22 | s29080.1         | OAR22_49444571.1 | 3407.59 | 66  |
| S1195 | CON   | 3   | 22 | s29080.1         | OAR22_46715650.1 | 678.668 | 12  |
| S1195 | UNION | 3   | 22 | OAR22_44931867.1 | OAR22_49444571.1 | 4512.7  | 94  |
| S1209 |       | 61  | 22 | OAR22_44931867.1 | s72791.1         | 1996.46 | 44  |
| S1209 |       | 123 | 22 | OAR22_44931867.1 | OAR22_46715650.1 | 1783.78 | 40  |
| S1209 |       | 79  | 22 | OAR22_44471234.1 | OAR22_45832317.1 | 1361.08 | 33  |
| S1209 | CON   | 3   | 22 | OAR22_44931867.1 | OAR22_45832317.1 | 900.45  | 23  |
| S1209 | UNION | 3   | 22 | OAR22_44471234.1 | s72791.1         | 2457.09 | 54  |
| S1212 |       | 27  | 21 | s25809.1         | s13923.1         | 11828.3 | 168 |
| S1212 |       | 49  | 21 | s74518.1         | s38134.1         | 13941.9 | 212 |
| S1212 |       | 606 | 21 | OAR21_21865772.1 | OAR21_36571389.1 | 14705.6 | 232 |
| S1212 | CON   | 3   | 21 | s25809.1         | s38134.1         | 446.814 | 8   |
| S1212 | UNION | 3   | 21 | s74518.1         | s13923.1         | 25323.4 | 372 |
| S1213 |       | 801 | 21 | OAR21_17659120.1 | s64572.1         | 2030.63 | 35  |
| S1213 |       | 123 | 21 | OAR21_15046774.1 | OAR21_17819384.1 | 2772.61 | 42  |
| S1213 |       | 79  | 21 | OAR21_16500504.1 | OAR21_24084777.1 | 7584.27 | 125 |
| S1213 | CON   | 3   | 21 | OAR21_17659120.1 | OAR21_17819384.1 | 160.264 | 6   |
| S1213 | UNION | 3   | 21 | OAR21_15046774.1 | OAR21_24084777.1 | 9038    | 144 |
| S1216 |       | 702 | 21 | s74845.1         | OAR21_17189778.1 | 17189.8 | 241 |
| S1216 |       | 123 | 21 | OAR21_15046774.1 | OAR21_17819384.1 | 2772.61 | 42  |
| S1216 |       | 79  | 21 | OAR21_16500504.1 | OAR21_24084777.1 | 7584.27 | 125 |
| S1216 | CON   | 3   | 21 | OAR21_16500504.1 | OAR21_17189778.1 | 689.274 | 10  |
| S1216 | UNION | 3   | 21 | s74845.1         | OAR21_24084777.1 | 24084.8 | 356 |
| S1217 |       | 27  | 21 | OAR21_6702302.1  | s41655.1         | 5418.27 | 94  |
| S1217 |       | 140 | 21 | OAR21_2317339.1  | OAR21_6702302.1  | 4384.96 | 47  |
| S1217 |       | 702 | 21 | s74845.1         | OAR21_17189778.1 | 17189.8 | 241 |
| S1217 | CON   | 3   | 21 | OAR21_6702302.1  | OAR21_6702302.1  | 0       | 1   |
| S1217 | UNION | 3   | 21 | s74845.1         | OAR21_17189778.1 | 17189.8 | 241 |
| S1218 |       | 606 | 20 | OAR20_50867736.1 | OAR20_55563675.1 | 4695.94 | 69  |
| S1218 |       | 40  | 20 | s14624.1         | OAR20_52019528.1 | 1930.35 | 35  |
| S1218 |       | 829 | 20 | OAR20_49963583.1 | s46244.1         | 1975.9  | 36  |
| S1218 | CON   | 3   | 20 | OAR20_50867736.1 | s46244.1         | 1071.75 | 17  |
| S1218 | UNION | 3   | 20 | OAR20_49963583.1 | OAR20_55563675.1 | 5600.09 | 88  |
| S1219 |       | 606 | 20 | s40462.1         | s37556.1         | 1520.29 | 37  |
| S1219 |       | 29  | 20 | OAR20_45542235.1 | s37556.1         | 1477.59 | 36  |
| S1219 |       | 123 | 20 | OAR20_46544221.1 | OAR20_49453726.1 | 2909.51 | 63  |
| S1219 | CON   | 3   | 20 | OAR20_46544221.1 | s37556.1         | 475.603 | 13  |
| S1219 | UNION | 3   | 20 | s40462.1         | OAR20_49453726.1 | 3954.19 | 87  |

|       |       |     |    |                    |                  |         |     |
|-------|-------|-----|----|--------------------|------------------|---------|-----|
| S1229 |       | 27  | 20 | OAR20_42482053.1   | s54536.1         | 2596.59 | 58  |
| S1229 |       | 844 | 20 | OAR20_42071000_X.1 | s25696.1         | 3826.95 | 84  |
| S1229 |       | 29  | 20 | OAR20_41289146.1   | OAR20_42731904.1 | 1442.76 | 36  |
| S1229 | CON   | 3   | 20 | OAR20_42482053.1   | OAR20_42731904.1 | 249.851 | 8   |
| S1229 | UNION | 3   | 20 | OAR20_41289146.1   | s25696.1         | 4608.8  | 103 |
| S1236 |       | 140 | 20 | OAR20_17174254.1   | s16638.1         | 1783.83 | 32  |
| S1236 |       | 627 | 20 | s44306.1           | s06051.1         | 3639.25 | 77  |
| S1236 |       | 29  | 20 | s38719.1           | OAR20_17775022.1 | 4200.7  | 84  |
| S1236 | CON   | 3   | 20 | OAR20_17174254.1   | OAR20_17775022.1 | 600.768 | 9   |
| S1236 | UNION | 3   | 20 | s38719.1           | s06051.1         | 6250.08 | 128 |
| S1237 |       | 29  | 20 | s38719.1           | OAR20_17775022.1 | 4200.7  | 84  |
| S1237 |       | 27  | 20 | OAR20_11442511.1   | s59954.1         | 2223.77 | 40  |
| S1237 |       | 702 | 20 | OAR20_27119.1      | OAR20_14072832.1 | 14045.7 | 264 |
| S1237 | CON   | 3   | 20 | s38719.1           | s59954.1         | 91.957  | 2   |
| S1237 | UNION | 3   | 20 | OAR20_27119.1      | OAR20_17775022.1 | 17747.9 | 335 |
| S1240 |       | 702 | 20 | OAR20_27119.1      | OAR20_14072832.1 | 14045.7 | 264 |
| S1240 |       | 152 | 20 | OAR20_7626319.1    | s15774.1         | 2135.34 | 43  |
| S1240 |       | 90  | 20 | s34560.1           | s74774.1         | 5360.26 | 107 |
| S1240 | CON   | 3   | 20 | s34560.1           | s15774.1         | 1764.37 | 38  |
| S1240 | UNION | 3   | 20 | OAR20_27119.1      | OAR20_14072832.1 | 14045.7 | 264 |
| S1243 |       | 123 | 19 | s06628.1           | s48005.1         | 14962.5 | 245 |
| S1243 |       | 29  | 19 | s08949.1           | s26710.1         | 3068.64 | 46  |
| S1243 |       | 27  | 19 | s21070.1           | OAR19_58095077.1 | 2593.53 | 49  |
| S1243 | CON   | 3   | 19 | s21070.1           | s26710.1         | 1202.82 | 22  |
| S1243 | UNION | 3   | 19 | s06628.1           | OAR19_58095077.1 | 16255.3 | 271 |
| S1244 |       | 123 | 19 | s06628.1           | s48005.1         | 14962.5 | 245 |
| S1244 |       | 140 | 19 | s45366.1           | s34745.1         | 3419.3  | 49  |
| S1244 |       | 29  | 19 | s08949.1           | s26710.1         | 3068.64 | 46  |
| S1244 | CON   | 3   | 19 | s08949.1           | s34745.1         | 410.491 | 5   |
| S1244 | UNION | 3   | 19 | s06628.1           | s48005.1         | 14962.5 | 245 |
| S1257 |       | 79  | 19 | s55682.1           | OAR19_34354181.1 | 2692.56 | 49  |
| S1257 |       | 45  | 19 | OAR19_31737971_X.1 | s23858.1         | 2050.04 | 36  |
| S1257 |       | 844 | 19 | OAR19_32284446.1   | OAR19_37764352.1 | 5479.91 | 109 |
| S1257 | CON   | 3   | 19 | OAR19_32284446.1   | s23858.1         | 1503.57 | 28  |
| S1257 | UNION | 3   | 19 | s55682.1           | OAR19_37764352.1 | 6102.73 | 119 |
| S1261 |       | 507 | 19 | OAR19_25643551.1   | OAR19_29244492.1 | 3600.94 | 62  |
| S1261 |       | 616 | 19 | OAR19_24079470.1   | OAR19_29193780.1 | 5114.31 | 84  |
| S1261 |       | 49  | 19 | OAR19_21684191.1   | s55682.1         | 9977.43 | 163 |
| S1261 | CON   | 3   | 19 | OAR19_25643551.1   | OAR19_29193780.1 | 3550.23 | 60  |
| S1261 | UNION | 3   | 19 | OAR19_21684191.1   | s55682.1         | 9977.43 | 163 |
| S1262 |       | 616 | 19 | OAR19_24079470.1   | OAR19_29193780.1 | 5114.31 | 84  |
| S1262 |       | 49  | 19 | OAR19_21684191.1   | s55682.1         | 9977.43 | 163 |
| S1262 |       | 702 | 19 | OAR19_7253713.1    | s27711.1         | 16961.5 | 313 |
| S1262 | CON   | 3   | 19 | OAR19_24079470.1   | s27711.1         | 135.761 | 3   |
| S1262 | UNION | 3   | 19 | OAR19_7253713.1    | s55682.1         | 24407.9 | 439 |
| S1264 |       | 507 | 19 | s21945.1           | s40021.1         | 5779.07 | 97  |

|       |       |     |    |                     |                  |         |     |
|-------|-------|-----|----|---------------------|------------------|---------|-----|
| S1264 |       | 27  | 19 | s09766.1            | OAR19_2409205.1  | 2409.2  | 39  |
| S1264 |       | 79  | 19 | OAR19_1987551.1     | OAR19_3684221.1  | 1696.67 | 33  |
| S1264 | CON   | 3   | 19 | OAR19_1987551.1     | OAR19_2409205.1  | 421.654 | 8   |
| S1264 | UNION | 3   | 19 | s21945.1            | s40021.1         | 5779.07 | 97  |
| S1265 |       | 606 | 18 | OAR18_52219091.1    | s59424.1         | 5545.32 | 70  |
| S1265 |       | 829 | 18 | OAR18_56445082.1    | s36667.1         | 4906.48 | 93  |
| S1265 |       | 507 | 18 | s14692.1            | OAR18_59623348.1 | 2295.67 | 44  |
| S1265 | CON   | 3   | 18 | s14692.1            | s59424.1         | 436.737 | 7   |
| S1265 | UNION | 3   | 18 | OAR18_52219091.1    | s36667.1         | 9132.47 | 145 |
| S1266 |       | 606 | 18 | OAR18_52219091.1    | s59424.1         | 5545.32 | 70  |
| S1266 |       | 140 | 18 | OAR18_54263457.1    | OAR18_57166462.1 | 2903.01 | 35  |
| S1266 |       | 829 | 18 | OAR18_56445082.1    | s36667.1         | 4906.48 | 93  |
| S1266 | CON   | 3   | 18 | OAR18_56445082.1    | OAR18_57166462.1 | 721.38  | 8   |
| S1266 | UNION | 3   | 18 | OAR18_52219091.1    | s36667.1         | 9132.47 | 145 |
| S1271 |       | 140 | 18 | s31152.1            | OAR18_21577929.1 | 1843.36 | 37  |
| S1271 |       | 45  | 18 | s66371.1            | OAR18_24036473.1 | 4407.12 | 76  |
| S1271 |       | 507 | 18 | s44433.1            | OAR18_29143813.1 | 9489.05 | 160 |
| S1271 | CON   | 3   | 18 | s31152.1            | OAR18_21577929.1 | 1843.36 | 37  |
| S1271 | UNION | 3   | 18 | s66371.1            | OAR18_29143813.1 | 9514.46 | 161 |
| S1273 |       | 40  | 18 | OAR18_12013453.1    | s73019.1         | 2210.28 | 40  |
| S1273 |       | 629 | 18 | OAR18_12872464.1    | OAR18_14500139.1 | 1627.67 | 33  |
| S1273 |       | 140 | 18 | s24860.1            | OAR18_16428067.1 | 2788.24 | 58  |
| S1273 | CON   | 3   | 18 | s24860.1            | s73019.1         | 583.902 | 8   |
| S1273 | UNION | 3   | 18 | OAR18_12013453.1    | OAR18_16428067.1 | 4414.61 | 90  |
| S1276 |       | 629 | 18 | OAR18_2457937_X.1   | OAR18_9257846.1  | 6799.91 | 133 |
| S1276 |       | 606 | 18 | s07816.1            | OAR18_9083749.1  | 9083.75 | 161 |
| S1276 |       | 123 | 18 | OARUn.992_53657_X.1 | s30059.1         | 7868.3  | 144 |
| S1276 | CON   | 3   | 18 | OAR18_2457937_X.1   | s30059.1         | 5410.36 | 102 |
| S1276 | UNION | 3   | 18 | OARUn.992_53657_X.1 | OAR18_9257846.1  | 9257.85 | 175 |
| S1279 |       | 616 | 17 | s68769.1            | s27077.1         | 2265.51 | 34  |
| S1279 |       | 844 | 17 | s06760.1            | s72479.1         | 2205.58 | 38  |
| S1279 |       | 45  | 17 | s15206.1            | s22205.1         | 6445.19 | 96  |
| S1279 | CON   | 3   | 17 | s68769.1            | s72479.1         | 89.484  | 3   |
| S1279 | UNION | 3   | 17 | s15206.1            | s22205.1         | 6445.19 | 96  |
| S1280 |       | 844 | 17 | s06760.1            | s72479.1         | 2205.58 | 38  |
| S1280 |       | 49  | 17 | s47858.1            | s22875.1         | 2512.56 | 32  |
| S1280 |       | 45  | 17 | s15206.1            | s22205.1         | 6445.19 | 96  |
| S1280 | CON   | 3   | 17 | s06760.1            | s22875.1         | 118.536 | 4   |
| S1280 | UNION | 3   | 17 | s47858.1            | s22205.1         | 6864.9  | 99  |
| S1281 |       | 49  | 17 | s47858.1            | s22875.1         | 2512.56 | 32  |
| S1281 |       | 702 | 17 | OAR17_36966397.1    | OAR17_74039265.1 | 37072.9 | 600 |
| S1281 |       | 45  | 17 | s15206.1            | s22205.1         | 6445.19 | 96  |
| S1281 | CON   | 3   | 17 | s15206.1            | OAR17_74039265.1 | 1870.06 | 24  |
| S1281 | UNION | 3   | 17 | OAR17_36966397.1    | s22205.1         | 41648   | 672 |
| S1292 |       | 49  | 17 | OAR17_15114925.1    | OAR17_33024300.1 | 17909.4 | 313 |
| S1292 |       | 61  | 17 | OAR17_31146799.1    | OAR17_33487124.1 | 2340.32 | 46  |

|       |       |     |    |                  |                    |         |     |
|-------|-------|-----|----|------------------|--------------------|---------|-----|
| S1292 |       | 629 | 17 | OAR17_32056831.1 | OAR17_34275919.1   | 2219.09 | 43  |
| S1292 | CON   | 3   | 17 | OAR17_32056831.1 | OAR17_33024300.1   | 967.469 | 18  |
| S1292 | UNION | 3   | 17 | OAR17_15114925.1 | OAR17_34275919.1   | 19161   | 338 |
| S1293 |       | 61  | 17 | OAR17_31146799.1 | OAR17_33487124.1   | 2340.32 | 46  |
| S1293 |       | 829 | 17 | OAR17_29292591.1 | OAR17_31561091.1   | 2268.5  | 41  |
| S1293 |       | 49  | 17 | OAR17_15114925.1 | OAR17_33024300.1   | 17909.4 | 313 |
| S1293 | CON   | 3   | 17 | OAR17_31146799.1 | OAR17_31561091.1   | 414.292 | 10  |
| S1293 | UNION | 3   | 17 | OAR17_15114925.1 | OAR17_33487124.1   | 18372.2 | 322 |
| S1294 |       | 829 | 17 | OAR17_29292591.1 | OAR17_31561091.1   | 2268.5  | 41  |
| S1294 |       | 49  | 17 | OAR17_15114925.1 | OAR17_33024300.1   | 17909.4 | 313 |
| S1294 |       | 140 | 17 | OAR17_28121648.1 | s05512.1           | 1821.91 | 32  |
| S1294 | CON   | 3   | 17 | OAR17_29292591.1 | s05512.1           | 650.972 | 11  |
| S1294 | UNION | 3   | 17 | OAR17_15114925.1 | OAR17_33024300.1   | 17909.4 | 313 |
| S1302 |       | 140 | 17 | OAR17_28121648.1 | s05512.1           | 1821.91 | 32  |
| S1302 |       | 801 | 17 | OAR17_27620209.1 | OAR17_29260298.1   | 1640.09 | 32  |
| S1302 |       | 49  | 17 | OAR17_15114925.1 | OAR17_33024300.1   | 17909.4 | 313 |
| S1302 | CON   | 3   | 17 | OAR17_28121648.1 | OAR17_29260298.1   | 1138.65 | 20  |
| S1302 | UNION | 3   | 17 | OAR17_15114925.1 | OAR17_33024300.1   | 17909.4 | 313 |
| S1305 |       | 702 | 16 | OAR16_63959301.1 | s59627.1           | 11378.9 | 220 |
| S1305 |       | 126 | 16 | OAR16_66186381.1 | OAR16_72265538.1   | 6079.16 | 118 |
| S1305 |       | 829 | 16 | s32243.1         | OAR16_74018348_X.1 | 2115.33 | 47  |
| S1305 | CON   | 3   | 16 | s32243.1         | OAR16_72265538.1   | 362.518 | 11  |
| S1305 | UNION | 3   | 16 | OAR16_63959301.1 | s59627.1           | 11378.9 | 220 |
| S1306 |       | 702 | 16 | OAR16_63959301.1 | s59627.1           | 11378.9 | 220 |
| S1306 |       | 126 | 16 | OAR16_66186381.1 | OAR16_72265538.1   | 6079.16 | 118 |
| S1306 |       | 123 | 16 | OAR16_69472743.1 | OAR16_71364480.1   | 1891.74 | 32  |
| S1306 | CON   | 3   | 16 | OAR16_69472743.1 | OAR16_71364480.1   | 1891.74 | 32  |
| S1306 | UNION | 3   | 16 | OAR16_63959301.1 | s59627.1           | 11378.9 | 220 |
| S1311 |       | 702 | 16 | OAR16_63959301.1 | s59627.1           | 11378.9 | 220 |
| S1311 |       | 629 | 16 | s07759.1         | OAR16_64570335.1   | 1827.46 | 36  |
| S1311 |       | 507 | 16 | OAR16_63959301.1 | OAR16_65917082.1   | 1957.78 | 37  |
| S1311 | CON   | 3   | 16 | OAR16_63959301.1 | OAR16_64570335.1   | 611.034 | 13  |
| S1311 | UNION | 3   | 16 | s07759.1         | s59627.1           | 12595.3 | 243 |
| S1312 |       | 61  | 16 | OAR16_32465649.1 | OAR16_50643262_X.1 | 18177.6 | 326 |
| S1312 |       | 616 | 16 | OAR16_40749182.1 | OAR16_55771610.1   | 15022.4 | 264 |
| S1312 |       | 123 | 16 | OAR16_41066473.1 | OAR16_43133409.1   | 2066.94 | 41  |
| S1312 | CON   | 3   | 16 | OAR16_41066473.1 | OAR16_43133409.1   | 2066.94 | 41  |
| S1312 | UNION | 3   | 16 | OAR16_32465649.1 | OAR16_55771610.1   | 23306   | 414 |
| S1313 |       | 606 | 16 | s61872.1         | OAR16_32278875.1   | 10181.3 | 193 |
| S1313 |       | 126 | 16 | s55728.1         | OAR16_31959917.1   | 3660.62 | 71  |
| S1313 |       | 40  | 16 | OAR16_31845248.1 | OAR16_33763548.1   | 1918.3  | 42  |
| S1313 | CON   | 3   | 16 | OAR16_31845248.1 | OAR16_31959917.1   | 114.669 | 3   |
| S1313 | UNION | 3   | 16 | s61872.1         | OAR16_33763548.1   | 11666   | 227 |
| S1314 |       | 702 | 16 | s52990.1         | OAR16_10814090.1   | 10538   | 191 |
| S1314 |       | 616 | 16 | s09833.1         | OAR16_6409309.1    | 1891.74 | 37  |
| S1314 |       | 79  | 16 | s09833.1         | OAR16_7116193.1    | 2598.62 | 50  |

|       |       |     |    |                  |                    |         |     |
|-------|-------|-----|----|------------------|--------------------|---------|-----|
| S1314 | CON   | 3   | 16 | s09833.1         | OAR16_6409309.1    | 1891.74 | 37  |
| S1314 | UNION | 3   | 16 | s52990.1         | OAR16_10814090.1   | 10538   | 191 |
| S1315 |       | 61  | 15 | OAR15_62680174.1 | OAR15_65584079.1   | 2903.91 | 67  |
| S1315 |       | 702 | 15 | OAR15_63768341.1 | OAR15_66653722.1   | 2885.38 | 65  |
| S1315 |       | 844 | 15 | s45839.1         | OAR15_65710884_X.1 | 1482.69 | 35  |
| S1315 | CON   | 3   | 15 | s45839.1         | OAR15_65584079.1   | 1355.89 | 33  |
| S1315 | UNION | 3   | 15 | OAR15_62680174.1 | OAR15_66653722.1   | 3973.55 | 87  |
| S1316 |       | 126 | 15 | s25555.1         | OAR15_39421343.1   | 3025.36 | 55  |
| S1316 |       | 49  | 15 | OAR15_35705338.1 | OAR15_38181495.1   | 2476.16 | 47  |
| S1316 |       | 606 | 15 | OAR15_35392874.1 | OAR15_37160581.1   | 1767.71 | 36  |
| S1316 | CON   | 3   | 15 | s25555.1         | OAR15_37160581.1   | 764.599 | 16  |
| S1316 | UNION | 3   | 15 | OAR15_35392874.1 | OAR15_39421343.1   | 4028.47 | 75  |
| S1326 |       | 702 | 15 | s33423.1         | s34566.1           | 24919.4 | 406 |
| S1326 |       | 49  | 15 | OAR15_4725093.1  | OAR15_14317931.1   | 9592.84 | 155 |
| S1326 |       | 27  | 15 | OAR15_12128190.1 | s35677.1           | 1460.32 | 31  |
| S1326 | CON   | 3   | 15 | OAR15_12128190.1 | s35677.1           | 1460.32 | 31  |
| S1326 | UNION | 3   | 15 | s33423.1         | s34566.1           | 24919.4 | 406 |
| S1327 |       | 507 | 15 | OAR15_8447146.1  | OAR15_11973263.1   | 3526.12 | 57  |
| S1327 |       | 49  | 15 | OAR15_4725093.1  | OAR15_14317931.1   | 9592.84 | 155 |
| S1327 |       | 702 | 15 | s33423.1         | s34566.1           | 24919.4 | 406 |
| S1327 | CON   | 3   | 15 | OAR15_8447146.1  | OAR15_11973263.1   | 3526.12 | 57  |
| S1327 | UNION | 3   | 15 | s33423.1         | s34566.1           | 24919.4 | 406 |
| S1328 |       | 152 | 15 | s74830.1         | OAR15_3794544.1    | 3794.54 | 65  |
| S1328 |       | 702 | 15 | s33423.1         | s34566.1           | 24919.4 | 406 |
| S1328 |       | 157 | 15 | OAR15_2886961.1  | s14178.1           | 2148.25 | 37  |
| S1328 | CON   | 3   | 15 | OAR15_2886961.1  | OAR15_3794544.1    | 907.583 | 14  |
| S1328 | UNION | 3   | 15 | s74830.1         | s34566.1           | 24919.4 | 409 |
| S1329 |       | 152 | 14 | s70225.1         | s63574.1           | 3879.52 | 30  |
| S1329 |       | 126 | 14 | OAR14_58104354.1 | s36676.1           | 6513.92 | 50  |
| S1329 |       | 123 | 14 | s09739.1         | s73257.1           | 7402.46 | 63  |
| S1329 | CON   | 3   | 14 | s70225.1         | s63574.1           | 3879.52 | 30  |
| S1329 | UNION | 3   | 14 | s09739.1         | s73257.1           | 7402.46 | 63  |
| S1332 |       | 702 | 14 | s22016.1         | s49153.1           | 8137.25 | 142 |
| S1332 |       | 627 | 14 | OAR14_18935490.1 | s63952.1           | 3002.98 | 58  |
| S1332 |       | 616 | 14 | s39735.1         | OAR14_21824579.1   | 1800.95 | 39  |
| S1332 | CON   | 3   | 14 | s39735.1         | OAR14_21824579.1   | 1800.95 | 39  |
| S1332 | UNION | 3   | 14 | s22016.1         | s49153.1           | 8137.25 | 142 |
| S1333 |       | 702 | 14 | s54311.1         | s51612.1           | 6481.31 | 111 |
| S1333 |       | 606 | 14 | OAR14_1720811.1  | OAR14_4424829.1    | 2704.02 | 50  |
| S1333 |       | 801 | 14 | DU206491_155.1   | OAR14_4424829.1    | 2428.84 | 44  |
| S1333 | CON   | 3   | 14 | DU206491_155.1   | OAR14_4424829.1    | 2428.84 | 44  |
| S1333 | UNION | 3   | 14 | s54311.1         | s51612.1           | 6481.31 | 111 |
| S1334 |       | 507 | 13 | s28658.1         | OAR13_82500579.1   | 3148.43 | 62  |
| S1334 |       | 29  | 13 | OAR13_80012567.1 | s64909.1           | 2537.79 | 56  |
| S1334 |       | 616 | 13 | OAR13_81897604.1 | s03117.1           | 1965.48 | 36  |
| S1334 | CON   | 3   | 13 | OAR13_81897604.1 | OAR13_82500579.1   | 602.975 | 11  |



|       |       |     |    |                   |                  |         |     |
|-------|-------|-----|----|-------------------|------------------|---------|-----|
| S1334 | UNION | 3   | 13 | s28658.1          | s03117.1         | 4510.93 | 87  |
| S1336 |       | 702 | 13 | s43103.1          | s69997.1         | 32663.3 | 559 |
| S1336 |       | 79  | 13 | s13366.1          | s49999.1         | 5945.38 | 115 |
| S1336 |       | 157 | 13 | s67695.1          | OAR13_74948343.1 | 2275.72 | 43  |
| S1336 | CON   | 3   | 13 | s67695.1          | OAR13_74948343.1 | 2275.72 | 43  |
| S1336 | UNION | 3   | 13 | s43103.1          | s69997.1         | 32663.3 | 559 |
| S1337 |       | 844 | 13 | s17883.1          | OAR13_68528151.1 | 4897.41 | 78  |
| S1337 |       | 606 | 13 | OAR13_60423450.1  | s33005.1         | 3263.21 | 60  |
| S1337 |       | 702 | 13 | s43103.1          | s69997.1         | 32663.3 | 559 |
| S1337 | CON   | 3   | 13 | s17883.1          | s33005.1         | 55.923  | 2   |
| S1337 | UNION | 3   | 13 | s43103.1          | s69997.1         | 32663.3 | 559 |
| S1345 |       | 702 | 13 | s43103.1          | s69997.1         | 32663.3 | 559 |
| S1345 |       | 79  | 13 | OAR13_53748496.1  | s31619.1         | 2561.29 | 33  |
| S1345 |       | 616 | 13 | OAR13_54850095.1  | OAR13_57402806.1 | 2552.71 | 39  |
| S1345 | CON   | 3   | 13 | OAR13_54850095.1  | s31619.1         | 1459.69 | 18  |
| S1345 | UNION | 3   | 13 | s43103.1          | s69997.1         | 32663.3 | 559 |
| S1349 |       | 79  | 13 | OAR13_53748496.1  | s31619.1         | 2561.29 | 33  |
| S1349 |       | 844 | 13 | OAR13_47720904.1  | s20479.1         | 6338.95 | 104 |
| S1349 |       | 702 | 13 | s43103.1          | s69997.1         | 32663.3 | 559 |
| S1349 | CON   | 3   | 13 | OAR13_53748496.1  | s20479.1         | 311.354 | 4   |
| S1349 | UNION | 3   | 13 | s43103.1          | s69997.1         | 32663.3 | 559 |
| S1355 |       | 829 | 13 | s12849.1          | OAR13_20578061.1 | 2410.3  | 38  |
| S1355 |       | 616 | 13 | OAR13_19366874.1  | s47163.1         | 7083.23 | 139 |
| S1355 |       | 123 | 13 | s43905.1          | OAR13_26635884.1 | 6436.53 | 127 |
| S1355 | CON   | 3   | 13 | s43905.1          | OAR13_20578061.1 | 378.708 | 10  |
| S1355 | UNION | 3   | 13 | s12849.1          | OAR13_26635884.1 | 8468.12 | 155 |
| S1362 |       | 49  | 13 | OAR13_13577766.1  | OAR13_17982125.1 | 4404.36 | 89  |
| S1362 |       | 829 | 13 | OAR13_16575159.1  | s35531.1         | 1525.75 | 32  |
| S1362 |       | 702 | 13 | s44144.1          | OAR13_19332393.1 | 2130.3  | 31  |
| S1362 | CON   | 3   | 13 | s44144.1          | OAR13_17982125.1 | 780.029 | 17  |
| S1362 | UNION | 3   | 13 | OAR13_13577766.1  | OAR13_19332393.1 | 5754.63 | 103 |
| S1363 |       | 829 | 13 | s65179.1          | OAR13_13952314.1 | 3280.8  | 41  |
| S1363 |       | 702 | 13 | OAR13_4448234.1   | OAR13_11941763.1 | 7493.53 | 117 |
| S1363 |       | 126 | 13 | OAR13_2980585_X.1 | s00832.1         | 9013.02 | 139 |
| S1363 | CON   | 3   | 13 | s65179.1          | OAR13_11941763.1 | 1270.25 | 5   |
| S1363 | UNION | 3   | 13 | OAR13_2980585_X.1 | OAR13_13952314.1 | 10971.7 | 174 |
| S1366 |       | 627 | 12 | OAR12_82122841.1  | OAR12_83955714.1 | 1832.87 | 34  |
| S1366 |       | 616 | 12 | s52578.1          | s09138.1         | 2230.84 | 40  |
| S1366 |       | 61  | 12 | s51577.1          | s33621.1         | 2613.36 | 41  |
| S1366 | CON   | 3   | 12 | s51577.1          | OAR12_83955714.1 | 167.025 | 5   |
| S1366 | UNION | 3   | 12 | OAR12_82122841.1  | s33621.1         | 4279.2  | 70  |
| S1370 |       | 702 | 12 | OAR12_80045456.1  | s38430.1         | 2801.48 | 51  |
| S1370 |       | 627 | 12 | OAR12_82122841.1  | OAR12_83955714.1 | 1832.87 | 34  |
| S1370 |       | 616 | 12 | s52578.1          | s09138.1         | 2230.84 | 40  |
| S1370 | CON   | 3   | 12 | s52578.1          | s38430.1         | 375.609 | 7   |
| S1370 | UNION | 3   | 12 | OAR12_80045456.1  | s09138.1         | 4656.71 | 84  |

|       |       |     |    |                  |                  |         |     |
|-------|-------|-----|----|------------------|------------------|---------|-----|
| S1382 |       | 90  | 12 | OAR12_72461244.1 | s65734.1         | 2576.88 | 55  |
| S1382 |       | 40  | 12 | OAR12_72598226.1 | OAR12_74743841.1 | 2145.61 | 46  |
| S1382 |       | 629 | 12 | s04331.1         | OAR12_74743841.1 | 1367.59 | 30  |
| S1382 | CON   | 3   | 12 | s04331.1         | OAR12_74743841.1 | 1367.59 | 30  |
| S1382 | UNION | 3   | 12 | OAR12_72461244.1 | s65734.1         | 2576.88 | 55  |
|       |       |     |    |                  |                  |         |     |
| S1388 |       | 507 | 12 | s13792.1         | s57817.1         | 31188.2 | 514 |
| S1388 |       | 702 | 12 | s66672.1         | s60216.1         | 3126.9  | 62  |
| S1388 |       | 606 | 12 | s61648.1         | OAR12_10619267.1 | 6012.46 | 53  |
| S1388 | CON   | 3   | 12 | s61648.1         | s60216.1         | 585.336 | 8   |
| S1388 | UNION | 3   | 12 | s13792.1         | s57817.1         | 31188.2 | 514 |
|       |       |     |    |                  |                  |         |     |
| S1392 |       | 507 | 12 | s13792.1         | s57817.1         | 31188.2 | 514 |
| S1392 |       | 702 | 12 | s66672.1         | s60216.1         | 3126.9  | 62  |
| S1392 |       | 157 | 12 | OAR12_2860767.1  | OAR12_4247318.1  | 1386.55 | 30  |
| S1392 | CON   | 3   | 12 | OAR12_2860767.1  | OAR12_4247318.1  | 1386.55 | 30  |
| S1392 | UNION | 3   | 12 | s13792.1         | s57817.1         | 31188.2 | 514 |
|       |       |     |    |                  |                  |         |     |
| S1393 |       | 702 | 11 | OAR11_45618835.1 | OAR11_53479950.1 | 7861.11 | 136 |
| S1393 |       | 90  | 11 | s07556.1         | OAR11_55421823.1 | 8158.13 | 135 |
| S1393 |       | 629 | 11 | s13742.1         | OAR11_61687914.1 | 12951   | 212 |
| S1393 | CON   | 3   | 11 | s13742.1         | OAR11_53479950.1 | 4742.99 | 78  |
| S1393 | UNION | 3   | 11 | OAR11_45618835.1 | OAR11_61687914.1 | 16069.1 | 270 |
|       |       |     |    |                  |                  |         |     |
| S1396 |       | 629 | 11 | OAR11_34446037.1 | OAR11_37253436.1 | 2807.4  | 52  |
| S1396 |       | 49  | 11 | OAR11_34446037.1 | s50883.1         | 3076.39 | 57  |
| S1396 |       | 29  | 11 | s12433.1         | s70389.1         | 1686.29 | 30  |
| S1396 | CON   | 3   | 11 | s12433.1         | OAR11_37253436.1 | 996.198 | 19  |
| S1396 | UNION | 3   | 11 | OAR11_34446037.1 | s70389.1         | 3497.49 | 63  |
|       |       |     |    |                  |                  |         |     |
| S1399 |       | 702 | 11 | OAR11_17172323.1 | OAR11_33359712.1 | 16187.4 | 260 |
| S1399 |       | 629 | 11 | s30225.1         | OAR11_32882457.1 | 2081.37 | 35  |
| S1399 |       | 152 | 11 | OAR11_32301525.1 | OAR11_34348656.1 | 2047.13 | 32  |
| S1399 | CON   | 3   | 11 | OAR11_32301525.1 | OAR11_32882457.1 | 580.932 | 9   |
| S1399 | UNION | 3   | 11 | OAR11_17172323.1 | OAR11_34348656.1 | 17176.3 | 277 |
|       |       |     |    |                  |                  |         |     |
| S1400 |       | 702 | 11 | OAR11_17172323.1 | OAR11_33359712.1 | 16187.4 | 260 |
| S1400 |       | 79  | 11 | s73325.1         | s62452.1         | 1651.72 | 35  |
| S1400 |       | 629 | 11 | s30225.1         | OAR11_32882457.1 | 2081.37 | 35  |
| S1400 | CON   | 3   | 11 | s30225.1         | s62452.1         | 398.717 | 9   |
| S1400 | UNION | 3   | 11 | OAR11_17172323.1 | OAR11_33359712.1 | 16187.4 | 260 |
|       |       |     |    |                  |                  |         |     |
| S1412 |       | 45  | 10 | OAR10_79145098.1 | OAR10_87563877.1 | 8418.78 | 181 |
| S1412 |       | 79  | 10 | OAR10_79145098.1 | s67060.1         | 9854.04 | 210 |
| S1412 |       | 152 | 10 | OAR10_84897197.1 | OAR10_88168947.1 | 3271.75 | 67  |
| S1412 | CON   | 3   | 10 | OAR10_84897197.1 | OAR10_87563877.1 | 2666.68 | 56  |
| S1412 | UNION | 3   | 10 | OAR10_79145098.1 | s67060.1         | 9854.04 | 210 |
|       |       |     |    |                  |                  |         |     |
| S1413 |       | 507 | 10 | OAR10_54127756.1 | s31288.1         | 7114.03 | 124 |
| S1413 |       | 27  | 10 | OAR10_52097098.1 | OAR10_55148103.1 | 3051.01 | 65  |
| S1413 |       | 45  | 10 | OAR10_35722333.1 | OAR10_57396545.1 | 21674.2 | 405 |
| S1413 | CON   | 3   | 10 | OAR10_54127756.1 | OAR10_55148103.1 | 1020.35 | 20  |
| S1413 | UNION | 3   | 10 | OAR10_35722333.1 | s31288.1         | 25519.4 | 468 |

|       |       |     |    |                   |                  |         |      |
|-------|-------|-----|----|-------------------|------------------|---------|------|
| S1416 |       | 507 | 10 | OAR10_15620012.1  | OAR10_19558015.1 | 3938    | 70   |
| S1416 |       | 844 | 10 | OAR10_11311566.1  | OAR10_15972516.1 | 4660.95 | 92   |
| S1416 |       | 702 | 10 | s49567.1          | OAR10_48462141.1 | 48462.1 | 914  |
| S1416 | CON   | 3   | 10 | OAR10_15620012.1  | OAR10_15972516.1 | 352.504 | 7    |
| S1416 | UNION | 3   | 10 | s49567.1          | OAR10_48462141.1 | 48462.1 | 914  |
|       |       |     |    |                   |                  |         |      |
| S1417 |       | 61  | 10 | OAR10_9852956.1   | s23854.1         | 2137.39 | 41   |
| S1417 |       | 29  | 10 | s62543.1          | s72120.1         | 1935.26 | 37   |
| S1417 |       | 702 | 10 | s49567.1          | OAR10_48462141.1 | 48462.1 | 914  |
| S1417 | CON   | 3   | 10 | OAR10_9852956.1   | s72120.1         | 152.651 | 4    |
| S1417 | UNION | 3   | 10 | s49567.1          | OAR10_48462141.1 | 48462.1 | 914  |
|       |       |     |    |                   |                  |         |      |
| S1418 |       | 616 | 9  | OAR9_94565556_X.1 | OAR9_96141857.1  | 1576.3  | 30   |
| S1418 |       | 702 | 9  | OAR9_38323108.1   | OAR9_96544082.1  | 58221   | 1087 |
| S1418 |       | 29  | 9  | OAR9_94742308.1   | s44758.1         | 2123.59 | 44   |
| S1418 | CON   | 3   | 9  | OAR9_94742308.1   | OAR9_96141857.1  | 1399.55 | 28   |
| S1418 | UNION | 3   | 9  | OAR9_38323108.1   | s44758.1         | 58542.8 | 1094 |
|       |       |     |    |                   |                  |         |      |
| S1419 |       | 702 | 9  | OAR9_38323108.1   | OAR9_96544082.1  | 58221   | 1087 |
| S1419 |       | 152 | 9  | OAR9_77508470.1   | s62001.1         | 3135.15 | 63   |
| S1419 |       | 140 | 9  | s10879.1          | s05406.1         | 2485.9  | 47   |
| S1419 | CON   | 3   | 9  | s10879.1          | s62001.1         | 445.803 | 8    |
| S1419 | UNION | 3   | 9  | OAR9_38323108.1   | OAR9_96544082.1  | 58221   | 1087 |
|       |       |     |    |                   |                  |         |      |
| S1433 |       | 29  | 9  | OAR9_69054720.1   | OAR9_73056873.1  | 4002.15 | 80   |
| S1433 |       | 507 | 9  | OAR9_66516428.1   | OAR9_70808263.1  | 4291.84 | 72   |
| S1433 |       | 702 | 9  | OAR9_38323108.1   | OAR9_96544082.1  | 58221   | 1087 |
| S1433 | CON   | 3   | 9  | OAR9_69054720.1   | OAR9_70808263.1  | 1753.54 | 30   |
| S1433 | UNION | 3   | 9  | OAR9_38323108.1   | OAR9_96544082.1  | 58221   | 1087 |
|       |       |     |    |                   |                  |         |      |
| S1434 |       | 79  | 9  | s73465.1          | OAR9_40771150.1  | 8319.46 | 179  |
| S1434 |       | 45  | 9  | s68634.1          | s50783.1         | 21048.3 | 358  |
| S1434 |       | 702 | 9  | OAR9_38323108.1   | OAR9_96544082.1  | 58221   | 1087 |
| S1434 | CON   | 3   | 9  | OAR9_38323108.1   | OAR9_40771150.1  | 2448.04 | 49   |
| S1434 | UNION | 3   | 9  | s73465.1          | OAR9_96544082.1  | 64092.4 | 1217 |
|       |       |     |    |                   |                  |         |      |
| S1439 |       | 126 | 9  | s59135.1          | OAR9_20804687.1  | 2341.2  | 49   |
| S1439 |       | 606 | 9  | s18791.1          | s12376.1         | 1409.01 | 30   |
| S1439 |       | 45  | 9  | OAR9_18493683.1   | s19052.1         | 5564.34 | 125  |
| S1439 | CON   | 3   | 9  | OAR9_18493683.1   | s12376.1         | 103.495 | 3    |
| S1439 | UNION | 3   | 9  | s18791.1          | s19052.1         | 6869.85 | 152  |
|       |       |     |    |                   |                  |         |      |
| S1442 |       | 844 | 9  | OAR9_5773857.1    | s10011.1         | 10109   | 172  |
| S1442 |       | 152 | 9  | OAR9_8876882.1    | s21274.1         | 4522.12 | 76   |
| S1442 |       | 27  | 9  | OAR9_11283827.1   | s21274.1         | 2115.18 | 31   |
| S1442 | CON   | 3   | 9  | OAR9_11283827.1   | s21274.1         | 2115.18 | 31   |
| S1442 | UNION | 3   | 9  | OAR9_5773857.1    | s10011.1         | 10109   | 172  |
|       |       |     |    |                   |                  |         |      |
| S1443 |       | 844 | 9  | OAR9_5773857.1    | s10011.1         | 10109   | 172  |
| S1443 |       | 629 | 9  | OAR9_3164827.1    | OAR9_5842029.1   | 2677.2  | 53   |
| S1443 |       | 123 | 9  | OAR9_1203135.1    | s25647.1         | 4723.76 | 95   |
| S1443 | CON   | 3   | 9  | OAR9_5773857.1    | OAR9_5842029.1   | 68.172  | 3    |
| S1443 | UNION | 3   | 9  | OAR9_1203135.1    | s10011.1         | 14679.7 | 263  |
|       |       |     |    |                   |                  |         |      |
| S1444 |       | 629 | 9  | OAR9_3164827.1    | OAR9_5842029.1   | 2677.2  | 53   |

|       |       |     |   |                  |                   |         |     |
|-------|-------|-----|---|------------------|-------------------|---------|-----|
| S1444 |       | 79  | 9 | OAR9_2798433.1   | OAR9_4459408.1    | 1660.97 | 32  |
| S1444 |       | 123 | 9 | OAR9_1203135.1   | s25647.1          | 4723.76 | 95  |
| S1444 | CON   | 3   | 9 | OAR9_3164827.1   | OAR9_4459408.1    | 1294.58 | 27  |
| S1444 | UNION | 3   | 9 | OAR9_1203135.1   | s25647.1          | 4723.76 | 95  |
| S1450 |       | 61  | 8 | OAR8_91007371.1  | OAR8_93131673.1   | 2124.3  | 53  |
| S1450 |       | 49  | 8 | OAR8_91293224.1  | s52430.1          | 1238.58 | 33  |
| S1450 |       | 606 | 8 | OAR8_91701722.1  | s53145.1          | 2751.4  | 60  |
| S1450 | CON   | 3   | 8 | OAR8_91701722.1  | s52430.1          | 830.078 | 22  |
| S1450 | UNION | 3   | 8 | OAR8_91007371.1  | s53145.1          | 3445.75 | 78  |
| S1455 |       | 507 | 8 | OAR8_85811057.1  | s41250.1          | 2810.84 | 53  |
| S1455 |       | 79  | 8 | OAR8_81635650.1  | OAR8_87540028.1   | 5904.38 | 127 |
| S1455 |       | 606 | 8 | OAR8_86919224.1  | OAR8_89769401.1   | 2850.18 | 48  |
| S1455 | CON   | 3   | 8 | OAR8_86919224.1  | OAR8_87540028.1   | 620.804 | 14  |
| S1455 | UNION | 3   | 8 | OAR8_81635650.1  | OAR8_89769401.1   | 8133.75 | 161 |
| S1466 |       | 49  | 8 | OAR8_77578890.1  | s01826.1          | 8664.11 | 175 |
| S1466 |       | 126 | 8 | s00802.1         | OAR8_82107007.1   | 3531.36 | 62  |
| S1466 |       | 79  | 8 | OAR8_81635650.1  | OAR8_87540028.1   | 5904.38 | 127 |
| S1466 | CON   | 3   | 8 | OAR8_81635650.1  | OAR8_82107007.1   | 471.357 | 10  |
| S1466 | UNION | 3   | 8 | OAR8_77578890.1  | OAR8_87540028.1   | 9961.14 | 204 |
| S1471 |       | 556 | 8 | OAR8_76403936.1  | OAR8_78079638.1   | 1675.7  | 31  |
| S1471 |       | 27  | 8 | OAR8_73702430.1  | s22687.1          | 2779.43 | 58  |
| S1471 |       | 140 | 8 | OAR8_73355352.1  | s22687.1          | 3126.51 | 64  |
| S1471 | CON   | 3   | 8 | OAR8_76403936.1  | s22687.1          | 77.926  | 3   |
| S1471 | UNION | 3   | 8 | OAR8_73355352.1  | OAR8_78079638.1   | 4724.29 | 92  |
| S1476 |       | 507 | 8 | s24061.1         | OAR8_74194992.1   | 1639.28 | 32  |
| S1476 |       | 61  | 8 | OAR8_69411239.1  | OAR8_73226726.1   | 3815.49 | 73  |
| S1476 |       | 152 | 8 | OAR8_72707636.1  | OAR8_74991269.1   | 2283.63 | 44  |
| S1476 | CON   | 3   | 8 | OAR8_72707636.1  | OAR8_73226726.1   | 519.09  | 11  |
| S1476 | UNION | 3   | 8 | OAR8_69411239.1  | OAR8_74991269.1   | 5580.03 | 106 |
| S1480 |       | 140 | 8 | s61158.1         | OAR8_52791160.1   | 9209.77 | 166 |
| S1480 |       | 27  | 8 | OAR8_49458688.1  | OAR8_51041603.1   | 1582.91 | 36  |
| S1480 |       | 507 | 8 | OAR8_50006699.1  | OAR8_52500656.1   | 2493.96 | 41  |
| S1480 | CON   | 3   | 8 | OAR8_50006699.1  | OAR8_51041603.1   | 1034.9  | 25  |
| S1480 | UNION | 3   | 8 | s61158.1         | OAR8_52791160.1   | 9209.77 | 166 |
| S1485 |       | 45  | 8 | OAR8_17854216.1  | s00683.1          | 2986.56 | 63  |
| S1485 |       | 126 | 8 | OAR8_16617875.1  | OAR8_18017904.1   | 1400.03 | 33  |
| S1485 |       | 27  | 8 | OAR8_16197437.1  | OAR8_22199299_X.1 | 6001.86 | 125 |
| S1485 | CON   | 3   | 8 | OAR8_17854216.1  | OAR8_18017904.1   | 163.688 | 5   |
| S1485 | UNION | 3   | 8 | OAR8_16197437.1  | OAR8_22199299_X.1 | 6001.86 | 125 |
| S1492 |       | 79  | 8 | DU438038_308.1   | OAR8_12613673.1   | 9152.14 | 171 |
| S1492 |       | 90  | 8 | OAR8_7630333.1   | s19466.1          | 2567.86 | 35  |
| S1492 |       | 801 | 8 | OAR8_9152520.1   | OAR8_11530695.1   | 2378.18 | 44  |
| S1492 | CON   | 3   | 8 | OAR8_9152520.1   | s19466.1          | 1045.68 | 18  |
| S1492 | UNION | 3   | 8 | DU438038_308.1   | OAR8_12613673.1   | 9152.14 | 171 |
| S1504 |       | 629 | 7 | OAR7_106304514.1 | OAR7_108923470.1  | 2618.96 | 49  |
| S1504 |       | 627 | 7 | OAR7_106304514.1 | OAR7_108844976.1  | 2540.46 | 47  |

|       |       |     |   |                  |                  |         |     |
|-------|-------|-----|---|------------------|------------------|---------|-----|
| S1504 |       | 49  | 7 | OAR7_107340259.1 | OAR7_108923470.1 | 1583.21 | 31  |
| S1504 | CON   | 3   | 7 | OAR7_107340259.1 | OAR7_108844976.1 | 1504.72 | 29  |
| S1504 | UNION | 3   | 7 | OAR7_106304514.1 | OAR7_108923470.1 | 2618.96 | 49  |
| S1505 |       | 629 | 7 | OAR7_106304514.1 | OAR7_108923470.1 | 2618.96 | 49  |
| S1505 |       | 627 | 7 | OAR7_106304514.1 | OAR7_108844976.1 | 2540.46 | 47  |
| S1505 |       | 45  | 7 | s37625.1         | s69049.1         | 1451.29 | 31  |
| S1505 | CON   | 3   | 7 | OAR7_106304514.1 | s69049.1         | 157.402 | 4   |
| S1505 | UNION | 3   | 7 | s37625.1         | OAR7_108923470.1 | 3912.84 | 76  |
| S1507 |       | 45  | 7 | s37625.1         | s69049.1         | 1451.29 | 31  |
| S1507 |       | 616 | 7 | OAR7_104475739.1 | s16852.1         | 1555.5  | 31  |
| S1507 |       | 702 | 7 | OAR7_97739969.1  | OAR7_105267200.1 | 7527.23 | 129 |
| S1507 | CON   | 3   | 7 | s37625.1         | OAR7_105267200.1 | 256.57  | 6   |
| S1507 | UNION | 3   | 7 | OAR7_97739969.1  | s69049.1         | 8721.95 | 154 |
| S1508 |       | 616 | 7 | OAR7_104475739.1 | s16852.1         | 1555.5  | 31  |
| S1508 |       | 29  | 7 | OAR7_102949447.1 | s58900.1         | 2012.6  | 32  |
| S1508 |       | 702 | 7 | OAR7_97739969.1  | OAR7_105267200.1 | 7527.23 | 129 |
| S1508 | CON   | 3   | 7 | OAR7_104475739.1 | s58900.1         | 486.305 | 9   |
| S1508 | UNION | 3   | 7 | OAR7_97739969.1  | s16852.1         | 8291.27 | 145 |
| S1510 |       | 702 | 7 | OAR7_97739969.1  | OAR7_105267200.1 | 7527.23 | 129 |
| S1510 |       | 606 | 7 | OAR7_100406183.1 | s46899.1         | 3556.11 | 59  |
| S1510 |       | 29  | 7 | OAR7_102949447.1 | s58900.1         | 2012.6  | 32  |
| S1510 | CON   | 3   | 7 | OAR7_102949447.1 | s46899.1         | 1012.84 | 17  |
| S1510 | UNION | 3   | 7 | OAR7_97739969.1  | OAR7_105267200.1 | 7527.23 | 129 |
| S1511 |       | 702 | 7 | OAR7_97739969.1  | OAR7_105267200.1 | 7527.23 | 129 |
| S1511 |       | 126 | 7 | OAR7_94733688.1  | OAR7_99255226.1  | 4521.54 | 85  |
| S1511 |       | 152 | 7 | OAR7_97719696.1  | OAR7_99836613.1  | 2116.92 | 37  |
| S1511 | CON   | 3   | 7 | OAR7_97739969.1  | OAR7_99255226.1  | 1515.26 | 25  |
| S1511 | UNION | 3   | 7 | OAR7_94733688.1  | OAR7_105267200.1 | 10533.5 | 189 |
| S1515 |       | 844 | 7 | s03357.1         | s61284.1         | 4208.81 | 84  |
| S1515 |       | 61  | 7 | OAR7_79189143.1  | s15556.1         | 5289.18 | 104 |
| S1515 |       | 627 | 7 | OAR7_78268516.1  | s03357.1         | 1902.67 | 35  |
| S1515 | CON   | 3   | 7 | s03357.1         | s03357.1         | 0       | 1   |
| S1515 | UNION | 3   | 7 | OAR7_78268516.1  | s15556.1         | 6209.8  | 120 |
| S1516 |       | 616 | 7 | s56266.1         | OAR7_31373399.1  | 1556.8  | 35  |
| S1516 |       | 126 | 7 | OAR7_31134779.1  | OAR7_32846682.1  | 1711.9  | 37  |
| S1516 |       | 45  | 7 | OAR7_31172405.1  | OAR7_58958307.1  | 27785.9 | 542 |
| S1516 | CON   | 3   | 7 | OAR7_31172405.1  | OAR7_31373399.1  | 200.994 | 6   |
| S1516 | UNION | 3   | 7 | s56266.1         | OAR7_58958307.1  | 29141.7 | 571 |
| S1519 |       | 123 | 7 | s13188.1         | s71719.1         | 12317   | 181 |
| S1519 |       | 126 | 7 | OAR7_21170284.1  | OAR7_24149695.1  | 2979.41 | 39  |
| S1519 |       | 157 | 7 | OAR7_22306460.1  | OAR7_29584778.1  | 7278.32 | 78  |
| S1519 | CON   | 3   | 7 | OAR7_22306460.1  | OAR7_24149695.1  | 1843.23 | 19  |
| S1519 | UNION | 3   | 7 | s13188.1         | OAR7_29584778.1  | 12352.9 | 182 |
| S1525 |       | 45  | 7 | s23542.1         | s45087.1         | 5861.48 | 112 |
| S1525 |       | 90  | 7 | s32513.1         | OAR7_10343956.1  | 2617.24 | 53  |
| S1525 |       | 123 | 7 | OAR7_9376658.1   | s19744.1         | 3586.07 | 67  |

|       |       |     |   |                  |                    |         |     |
|-------|-------|-----|---|------------------|--------------------|---------|-----|
| S1525 | CON   | 3   | 7 | OAR7_9376658.1   | OAR7_10343956.1    | 967.298 | 18  |
| S1525 | UNION | 3   | 7 | s32513.1         | s45087.1           | 6405.8  | 126 |
| S1536 |       | 702 | 6 | OAR6_124592433.1 | OAR6_129053557.1   | 4461.12 | 86  |
| S1536 |       | 79  | 6 | OAR6_125967269.1 | s55582.1           | 2969.33 | 57  |
| S1536 |       | 629 | 6 | OAR6_127050597.1 | OAR6_129053557.1   | 2002.96 | 40  |
| S1536 | CON   | 3   | 6 | OAR6_127050597.1 | s55582.1           | 1886    | 37  |
| S1536 | UNION | 3   | 6 | OAR6_124592433.1 | OAR6_129053557.1   | 4461.12 | 86  |
| S1537 |       | 616 | 6 | OAR6_124394473.1 | s14915.1           | 1746.14 | 35  |
| S1537 |       | 702 | 6 | OAR6_124592433.1 | OAR6_129053557.1   | 4461.12 | 86  |
| S1537 |       | 79  | 6 | OAR6_125967269.1 | s55582.1           | 2969.33 | 57  |
| S1537 | CON   | 3   | 6 | OAR6_125967269.1 | s14915.1           | 173.343 | 5   |
| S1537 | UNION | 3   | 6 | OAR6_124394473.1 | OAR6_129053557.1   | 4659.08 | 90  |
| S1539 |       | 702 | 6 | OAR6_124592433.1 | OAR6_129053557.1   | 4461.12 | 86  |
| S1539 |       | 29  | 6 | OAR6_121651498.1 | OAR6_124727445.1   | 3075.95 | 59  |
| S1539 |       | 616 | 6 | OAR6_124394473.1 | s14915.1           | 1746.14 | 35  |
| S1539 | CON   | 3   | 6 | OAR6_124592433.1 | OAR6_124727445.1   | 135.012 | 5   |
| S1539 | UNION | 3   | 6 | OAR6_121651498.1 | OAR6_129053557.1   | 7402.06 | 140 |
| S1540 |       | 606 | 6 | OAR6_119125205.1 | OAR6_121181023.1   | 2055.82 | 46  |
| S1540 |       | 844 | 6 | s59122.1         | OAR6_119125205.1   | 3781.3  | 51  |
| S1540 |       | 702 | 6 | s03175.1         | s49558.1           | 3896.24 | 53  |
| S1540 | CON   | 3   | 6 | OAR6_119125205.1 | OAR6_119125205.1   | 0       | 1   |
| S1540 | UNION | 3   | 6 | s03175.1         | OAR6_121181023.1   | 5895.75 | 97  |
| S1541 |       | 27  | 6 | OAR6_110447914.1 | s05385.1           | 1913.1  | 41  |
| S1541 |       | 29  | 6 | OAR6_109808350.1 | s05385.1           | 2552.67 | 56  |
| S1541 |       | 140 | 6 | OAR6_109808350.1 | OAR6_111646056.1   | 1837.71 | 44  |
| S1541 | CON   | 3   | 6 | OAR6_110447914.1 | OAR6_111646056.1   | 1198.14 | 29  |
| S1541 | UNION | 3   | 6 | OAR6_109808350.1 | s05385.1           | 2552.67 | 56  |
| S1542 |       | 45  | 6 | OAR6_96497355.1  | OAR6_107118527.1   | 10621.2 | 208 |
| S1542 |       | 123 | 6 | s52502.1         | OAR6_105661466.1   | 2254.54 | 35  |
| S1542 |       | 90  | 6 | OAR6_105017216.1 | OAR6_108898159.1   | 3880.94 | 72  |
| S1542 | CON   | 3   | 6 | OAR6_105017216.1 | OAR6_105661466.1   | 644.25  | 9   |
| S1542 | UNION | 3   | 6 | OAR6_96497355.1  | OAR6_108898159.1   | 12400.8 | 243 |
| S1543 |       | 90  | 6 | OAR6_101640082.1 | OAR6_103074951.1   | 1434.87 | 33  |
| S1543 |       | 45  | 6 | OAR6_96497355.1  | OAR6_107118527.1   | 10621.2 | 208 |
| S1543 |       | 844 | 6 | OAR6_101563461.1 | OAR6_104016857_X.1 | 2453.4  | 49  |
| S1543 | CON   | 3   | 6 | OAR6_101640082.1 | OAR6_103074951.1   | 1434.87 | 33  |
| S1543 | UNION | 3   | 6 | OAR6_96497355.1  | OAR6_107118527.1   | 10621.2 | 208 |
| S1544 |       | 507 | 6 | OAR6_95218086.1  | OAR6_99241952.1    | 4023.87 | 79  |
| S1544 |       | 629 | 6 | s49331.1         | OAR6_97850334.1    | 7126.43 | 128 |
| S1544 |       | 45  | 6 | OAR6_96497355.1  | OAR6_107118527.1   | 10621.2 | 208 |
| S1544 | CON   | 3   | 6 | OAR6_96497355.1  | OAR6_97850334.1    | 1352.98 | 28  |
| S1544 | UNION | 3   | 6 | s49331.1         | OAR6_107118527.1   | 16394.6 | 308 |
| S1547 |       | 152 | 6 | DU430803_572.1   | OAR6_94868641.1    | 1361.57 | 33  |
| S1547 |       | 140 | 6 | OAR6_91920640.1  | OAR6_94508578.1    | 2587.94 | 36  |
| S1547 |       | 629 | 6 | s49331.1         | OAR6_97850334.1    | 7126.43 | 128 |
| S1547 | CON   | 3   | 6 | DU430803_572.1   | OAR6_94508578.1    | 1001.5  | 23  |

|       |       |     |   |                  |                    |         |     |
|-------|-------|-----|---|------------------|--------------------|---------|-----|
| S1547 | UNION | 3   | 6 | s49331.1         | OAR6_97850334.1    | 7126.43 | 128 |
| S1560 |       | 627 | 6 | OAR6_66400799.1  | OAR6_90538374.1    | 24137.6 | 431 |
| S1560 |       | 90  | 6 | s51667.1         | OAR6_90538374.1    | 11120.6 | 185 |
| S1560 |       | 616 | 6 | OAR6_85367529.1  | OAR6_90479997.1    | 5112.47 | 77  |
| S1560 | CON   | 3   | 6 | OAR6_85367529.1  | OAR6_90479997.1    | 5112.47 | 77  |
| S1560 | UNION | 3   | 6 | OAR6_66400799.1  | OAR6_90538374.1    | 24137.6 | 431 |
| S1561 |       | 90  | 6 | s51667.1         | OAR6_90538374.1    | 11120.6 | 185 |
| S1561 |       | 140 | 6 | s69231.1         | OAR6_79639233.1    | 3393.23 | 59  |
| S1561 |       | 627 | 6 | OAR6_66400799.1  | OAR6_90538374.1    | 24137.6 | 431 |
| S1561 | CON   | 3   | 6 | s51667.1         | OAR6_79639233.1    | 221.413 | 4   |
| S1561 | UNION | 3   | 6 | OAR6_66400799.1  | OAR6_90538374.1    | 24137.6 | 431 |
| S1563 |       | 556 | 6 | OAR6_74224903.1  | OAR6_76377079.1    | 2152.18 | 45  |
| S1563 |       | 152 | 6 | OAR6_71400162.1  | OAR6_74224903.1    | 2824.74 | 58  |
| S1563 |       | 627 | 6 | OAR6_66400799.1  | OAR6_90538374.1    | 24137.6 | 431 |
| S1563 | CON   | 3   | 6 | OAR6_74224903.1  | OAR6_74224903.1    | 0       | 1   |
| S1563 | UNION | 3   | 6 | OAR6_66400799.1  | OAR6_90538374.1    | 24137.6 | 431 |
| S1564 |       | 627 | 6 | OAR6_66400799.1  | OAR6_90538374.1    | 24137.6 | 431 |
| S1564 |       | 90  | 6 | OAR6_67781585.1  | s33521.1           | 4904.72 | 95  |
| S1564 |       | 152 | 6 | OAR6_71400162.1  | OAR6_74224903.1    | 2824.74 | 58  |
| S1564 | CON   | 3   | 6 | OAR6_71400162.1  | s33521.1           | 1286.14 | 28  |
| S1564 | UNION | 3   | 6 | OAR6_66400799.1  | OAR6_90538374.1    | 24137.6 | 431 |
| S1565 |       | 40  | 6 | OAR6_62471770.1  | OAR6_65237136.1    | 2765.37 | 57  |
| S1565 |       | 627 | 6 | s36343.1         | OAR6_62795128.1    | 1664.66 | 33  |
| S1565 |       | 123 | 6 | OAR6_62227590.1  | OAR6_64593905.1    | 2366.32 | 47  |
| S1565 | CON   | 3   | 6 | OAR6_62471770.1  | OAR6_62795128.1    | 323.358 | 5   |
| S1565 | UNION | 3   | 6 | s36343.1         | OAR6_65237136.1    | 4106.67 | 85  |
| S1566 |       | 61  | 6 | OAR6_57881110.1  | OAR6_62074943.1    | 4193.83 | 74  |
| S1566 |       | 79  | 6 | OAR6_51660421.1  | s21191.1           | 10134.5 | 185 |
| S1566 |       | 627 | 6 | s36343.1         | OAR6_62795128.1    | 1664.66 | 33  |
| S1566 | CON   | 3   | 6 | s36343.1         | s21191.1           | 664.498 | 18  |
| S1566 | UNION | 3   | 6 | OAR6_51660421.1  | OAR6_62795128.1    | 11134.7 | 200 |
| S1569 |       | 29  | 6 | OAR6_55784046.1  | OAR6_58211072.1    | 2427.03 | 48  |
| S1569 |       | 79  | 6 | OAR6_51660421.1  | s21191.1           | 10134.5 | 185 |
| S1569 |       | 629 | 6 | OAR6_55321610.1  | OAR6_57182975.1    | 1861.37 | 37  |
| S1569 | CON   | 3   | 6 | OAR6_55784046.1  | OAR6_57182975.1    | 1398.93 | 26  |
| S1569 | UNION | 3   | 6 | OAR6_51660421.1  | s21191.1           | 10134.5 | 185 |
| S1572 |       | 629 | 6 | OAR6_55321610.1  | OAR6_57182975.1    | 1861.37 | 37  |
| S1572 |       | 702 | 6 | s10352.1         | OAR6_55321610.1    | 5954.38 | 118 |
| S1572 |       | 79  | 6 | OAR6_51660421.1  | s21191.1           | 10134.5 | 185 |
| S1572 | CON   | 3   | 6 | OAR6_55321610.1  | OAR6_55321610.1    | 0       | 1   |
| S1572 | UNION | 3   | 6 | s10352.1         | s21191.1           | 12427.7 | 236 |
| S1573 |       | 61  | 5 | DU254733_336.1   | OAR5_114683952_X.1 | 4203.15 | 89  |
| S1573 |       | 29  | 5 | OAR5_111535489.1 | OAR5_113136843.1   | 1601.35 | 37  |
| S1573 |       | 90  | 5 | OAR5_112354670.1 | OAR5_114101380.1   | 1746.71 | 38  |
| S1573 | CON   | 3   | 5 | OAR5_112354670.1 | OAR5_113136843.1   | 782.173 | 18  |
| S1573 | UNION | 3   | 5 | DU254733_336.1   | OAR5_114683952_X.1 | 4203.15 | 89  |

|       |       |     |   |                  |                  |         |     |
|-------|-------|-----|---|------------------|------------------|---------|-----|
| S1576 |       | 49  | 5 | OAR5_107618071.1 | OAR5_109537332.1 | 1919.26 | 42  |
| S1576 |       | 90  | 5 | OAR5_105969630.1 | OAR5_108700536.1 | 2730.91 | 53  |
| S1576 |       | 507 | 5 | OAR5_105769947.1 | s50506.1         | 2885.22 | 56  |
| S1576 | CON   | 3   | 5 | OAR5_107618071.1 | s50506.1         | 1037.1  | 22  |
| S1576 | UNION | 3   | 5 | OAR5_105769947.1 | OAR5_109537332.1 | 3767.39 | 76  |
| S1577 |       | 606 | 5 | s01299.1         | OAR5_86630257.1  | 3076.71 | 57  |
| S1577 |       | 27  | 5 | OAR5_79542638.1  | s15500.1         | 5963.32 | 115 |
| S1577 |       | 702 | 5 | OAR5_77977258.1  | OAR5_100127181.1 | 22149.9 | 428 |
| S1577 | CON   | 3   | 5 | s01299.1         | s15500.1         | 1952.41 | 36  |
| S1577 | UNION | 3   | 5 | OAR5_77977258.1  | OAR5_100127181.1 | 22149.9 | 428 |
| S1578 |       | 27  | 5 | OAR5_73707380.1  | OAR5_78020462.1  | 4313.08 | 92  |
| S1578 |       | 606 | 5 | OAR5_70256606.1  | OAR5_82901477.1  | 12644.9 | 245 |
| S1578 |       | 556 | 5 | OAR5_74249563.1  | s28640.1         | 1497.65 | 36  |
| S1578 | CON   | 3   | 5 | OAR5_74249563.1  | s28640.1         | 1497.65 | 36  |
| S1578 | UNION | 3   | 5 | OAR5_70256606.1  | OAR5_82901477.1  | 12644.9 | 245 |
| S1579 |       | 40  | 5 | s36503.1         | OAR5_24253861.1  | 3925.16 | 69  |
| S1579 |       | 152 | 5 | OAR5_22282164.1  | s15153.1         | 2048.29 | 47  |
| S1579 |       | 616 | 5 | OAR5_23613118.1  | OAR5_25164869.1  | 1551.75 | 33  |
| S1579 | CON   | 3   | 5 | OAR5_23613118.1  | OAR5_24253861.1  | 640.743 | 16  |
| S1579 | UNION | 3   | 5 | s36503.1         | OAR5_25164869.1  | 4836.17 | 86  |
| S1580 |       | 152 | 5 | OAR5_22282164.1  | s15153.1         | 2048.29 | 47  |
| S1580 |       | 45  | 5 | OAR5_10884558.1  | s06935.1         | 11513.7 | 188 |
| S1580 |       | 40  | 5 | s36503.1         | OAR5_24253861.1  | 3925.16 | 69  |
| S1580 | CON   | 3   | 5 | OAR5_22282164.1  | s06935.1         | 116.138 | 4   |
| S1580 | UNION | 3   | 5 | OAR5_10884558.1  | s15153.1         | 13445.9 | 231 |
| S1583 |       | 45  | 5 | OAR5_10884558.1  | s06935.1         | 11513.7 | 188 |
| S1583 |       | 61  | 5 | OAR5_12770106.1  | OAR5_22276454.1  | 9506.35 | 152 |
| S1583 |       | 40  | 5 | s36503.1         | OAR5_24253861.1  | 3925.16 | 69  |
| S1583 | CON   | 3   | 5 | s36503.1         | OAR5_22276454.1  | 1947.75 | 24  |
| S1583 | UNION | 3   | 5 | OAR5_10884558.1  | OAR5_24253861.1  | 13369.3 | 229 |
| S1584 |       | 507 | 4 | OAR4_117802819.1 | OAR4_121393593.1 | 3590.77 | 62  |
| S1584 |       | 90  | 4 | DU176899_379.1   | s56605.1         | 1405.36 | 33  |
| S1584 |       | 45  | 4 | OAR4_116517081.1 | OAR4_118303004.1 | 1785.92 | 44  |
| S1584 | CON   | 3   | 4 | OAR4_117802819.1 | OAR4_118303004.1 | 500.185 | 12  |
| S1584 | UNION | 3   | 4 | OAR4_116517081.1 | OAR4_121393593.1 | 4876.51 | 94  |
| S1589 |       | 45  | 4 | OAR4_116517081.1 | OAR4_118303004.1 | 1785.92 | 44  |
| S1589 |       | 844 | 4 | OAR4_115675953.1 | s65922.1         | 1382.7  | 35  |
| S1589 |       | 126 | 4 | s31432.1         | OAR4_116953207.1 | 2171.45 | 50  |
| S1589 | CON   | 3   | 4 | OAR4_116517081.1 | OAR4_116953207.1 | 436.126 | 13  |
| S1589 | UNION | 3   | 4 | s31432.1         | OAR4_118303004.1 | 3521.24 | 81  |
| S1590 |       | 126 | 4 | OAR4_103661998.1 | s45195.1         | 8630.78 | 167 |
| S1590 |       | 27  | 4 | s16058.1         | OAR4_115829682.1 | 8547.19 | 152 |
| S1590 |       | 507 | 4 | OAR4_111473821.1 | OAR4_115829682.1 | 4355.86 | 71  |
| S1590 | CON   | 3   | 4 | OAR4_111473821.1 | s45195.1         | 818.962 | 11  |
| S1590 | UNION | 3   | 4 | OAR4_103661998.1 | OAR4_115829682.1 | 12167.7 | 227 |



|       |       |     |   |                    |                   |         |     |
|-------|-------|-----|---|--------------------|-------------------|---------|-----|
| S1593 |       | 126 | 4 | OAR4_103661998.1   | s45195.1          | 8630.78 | 167 |
| S1593 |       | 27  | 4 | s16058.1           | OAR4_115829682.1  | 8547.19 | 152 |
| S1593 |       | 123 | 4 | OAR4_108117513.1   | s26707.1          | 1949.09 | 35  |
| S1593 | CON   | 3   | 4 | OAR4_108117513.1   | s26707.1          | 1949.09 | 35  |
| S1593 | UNION | 3   | 4 | OAR4_103661998.1   | OAR4_115829682.1  | 12167.7 | 227 |
| S1594 |       | 126 | 4 | OAR4_103661998.1   | s45195.1          | 8630.78 | 167 |
| S1594 |       | 61  | 4 | OAR4_106415496.1   | OAR4_107786618.1  | 1371.12 | 33  |
| S1594 |       | 27  | 4 | s16058.1           | OAR4_115829682.1  | 8547.19 | 152 |
| S1594 | CON   | 3   | 4 | s16058.1           | OAR4_107786618.1  | 504.128 | 12  |
| S1594 | UNION | 3   | 4 | OAR4_103661998.1   | OAR4_115829682.1  | 12167.7 | 227 |
| S1607 |       | 507 | 4 | OAR4_90105244.1    | OAR4_92447165.1   | 2341.92 | 53  |
| S1607 |       | 123 | 4 | OAR4_87201676.1    | OAR4_92644037.1   | 5442.36 | 118 |
| S1607 |       | 140 | 4 | OAR4_88648994.1    | OAR4_91820024.1   | 3171.03 | 67  |
| S1607 | CON   | 3   | 4 | OAR4_90105244.1    | OAR4_91820024.1   | 1714.78 | 39  |
| S1607 | UNION | 3   | 4 | OAR4_87201676.1    | OAR4_92644037.1   | 5442.36 | 118 |
| S1608 |       | 140 | 4 | OAR4_88648994.1    | OAR4_91820024.1   | 3171.03 | 67  |
| S1608 |       | 627 | 4 | OAR4_83576387.1    | OAR4_89216253.1   | 5639.87 | 112 |
| S1608 |       | 123 | 4 | OAR4_87201676.1    | OAR4_92644037.1   | 5442.36 | 118 |
| S1608 | CON   | 3   | 4 | OAR4_88648994.1    | OAR4_89216253.1   | 567.259 | 12  |
| S1608 | UNION | 3   | 4 | OAR4_83576387.1    | OAR4_92644037.1   | 9067.65 | 187 |
| S1616 |       | 627 | 4 | OAR4_70656759_X.1  | s13803.1          | 5088.69 | 101 |
| S1616 |       | 29  | 4 | s00796.1           | OAR4_70665707.1   | 1839.11 | 39  |
| S1616 |       | 702 | 4 | s58367.1           | OAR4_85483475.1   | 25992.5 | 514 |
| S1616 | CON   | 3   | 4 | OAR4_70656759_X.1  | OAR4_70665707.1   | 8.947   | 2   |
| S1616 | UNION | 3   | 4 | s58367.1           | OAR4_85483475.1   | 25992.5 | 514 |
| S1620 |       | 702 | 4 | s58367.1           | OAR4_85483475.1   | 25992.5 | 514 |
| S1620 |       | 152 | 4 | OAR4_63706459.1    | OAR4_69891218.1   | 6184.76 | 115 |
| S1620 |       | 29  | 4 | s00796.1           | OAR4_70665707.1   | 1839.11 | 39  |
| S1620 | CON   | 3   | 4 | s00796.1           | OAR4_69891218.1   | 1064.62 | 18  |
| S1620 | UNION | 3   | 4 | s58367.1           | OAR4_85483475.1   | 25992.5 | 514 |
| S1629 |       | 616 | 4 | OAR4_63468173.1    | s75934.1          | 1686.15 | 32  |
| S1629 |       | 157 | 4 | OAR4_61284730.1    | s64810.1          | 2274.83 | 45  |
| S1629 |       | 702 | 4 | s58367.1           | OAR4_85483475.1   | 25992.5 | 514 |
| S1629 | CON   | 3   | 4 | OAR4_63468173.1    | s64810.1          | 91.386  | 3   |
| S1629 | UNION | 3   | 4 | s58367.1           | OAR4_85483475.1   | 25992.5 | 514 |
| S1630 |       | 61  | 4 | OAR4_39813653.1    | OAR4_56340637.1   | 16527   | 308 |
| S1630 |       | 27  | 4 | OAR4_38036161.1    | OAR4_40146986.1   | 2110.82 | 50  |
| S1630 |       | 606 | 4 | OAR4_37940876.1    | OAR4_55963926.1   | 18023   | 344 |
| S1630 | CON   | 3   | 4 | OAR4_39813653.1    | OAR4_40146986.1   | 333.333 | 8   |
| S1630 | UNION | 3   | 4 | OAR4_37940876.1    | OAR4_56340637.1   | 18399.8 | 352 |
| S1631 |       | 61  | 4 | OAR4_27012742.1    | OAR4_29317435.1   | 2304.69 | 56  |
| S1631 |       | 29  | 4 | OAR4_24184274.1    | OAR4_27320940_X.1 | 3136.67 | 66  |
| S1631 |       | 49  | 4 | OAR4_22439455.1    | OAR4_29317435.1   | 6877.98 | 155 |
| S1631 | CON   | 3   | 4 | OAR4_27012742.1    | OAR4_27320940_X.1 | 308.199 | 7   |
| S1631 | UNION | 3   | 4 | OAR4_22439455.1    | OAR4_29317435.1   | 6877.98 | 155 |
| S1638 |       | 702 | 4 | OARUn.284_293028.1 | OAR4_24251309.1   | 24251.3 | 470 |

|       |       |     |   |                    |                    |         |     |
|-------|-------|-----|---|--------------------|--------------------|---------|-----|
| S1638 |       | 45  | 4 | OAR4_10748026.1    | OAR4_12498072.1    | 1750.05 | 39  |
| S1638 |       | 126 | 4 | s29747.1           | OAR4_16701883.1    | 4730.1  | 103 |
| S1638 | CON   | 3   | 4 | s29747.1           | OAR4_12498072.1    | 526.286 | 12  |
| S1638 | UNION | 3   | 4 | OARUn.284_293028.1 | OAR4_24251309.1    | 24251.3 | 470 |
| S1639 |       | 79  | 3 | OAR3_229469681_X.1 | s43578.1           | 2300.26 | 45  |
| S1639 |       | 29  | 3 | s65742.1           | OAR3_229832073.1   | 4118    | 90  |
| S1639 |       | 61  | 3 | OAR3_226997236.1   | s61647.1           | 2686.25 | 58  |
| S1639 | CON   | 3   | 3 | OAR3_229469681_X.1 | s61647.1           | 213.804 | 4   |
| S1639 | UNION | 3   | 3 | s65742.1           | s43578.1           | 6055.87 | 128 |
| S1641 |       | 152 | 3 | OAR3_205307357.1   | OAR3_207087501_X.1 | 1780.14 | 40  |
| S1641 |       | 801 | 3 | OAR3_202596537.1   | OAR3_205542104.1   | 2945.57 | 56  |
| S1641 |       | 507 | 3 | OAR3_179244393.1   | OAR3_211362922_X.1 | 32118.5 | 604 |
| S1641 | CON   | 3   | 3 | OAR3_205307357.1   | OAR3_205542104.1   | 234.747 | 5   |
| S1641 | UNION | 3   | 3 | OAR3_179244393.1   | OAR3_211362922_X.1 | 32118.5 | 604 |
| S1642 |       | 801 | 3 | OAR3_202596537.1   | OAR3_205542104.1   | 2945.57 | 56  |
| S1642 |       | 507 | 3 | OAR3_179244393.1   | OAR3_211362922_X.1 | 32118.5 | 604 |
| S1642 |       | 123 | 3 | s09050.1           | OAR3_202943170.1   | 11054.8 | 191 |
| S1642 | CON   | 3   | 3 | OAR3_202596537.1   | OAR3_202943170.1   | 346.633 | 8   |
| S1642 | UNION | 3   | 3 | OAR3_179244393.1   | OAR3_211362922_X.1 | 32118.5 | 604 |
| S1643 |       | 702 | 3 | OAR3_190128314.1   | OAR3_194730311.1   | 4602    | 79  |
| S1643 |       | 140 | 3 | OAR3_188369387.1   | s01421.1           | 2146.03 | 47  |
| S1643 |       | 507 | 3 | OAR3_179244393.1   | OAR3_211362922_X.1 | 32118.5 | 604 |
| S1643 | CON   | 3   | 3 | OAR3_190128314.1   | s01421.1           | 387.108 | 9   |
| S1643 | UNION | 3   | 3 | OAR3_179244393.1   | OAR3_211362922_X.1 | 32118.5 | 604 |
| S1644 |       | 152 | 3 | s44438.1           | OAR3_178996653.1   | 3191.08 | 37  |
| S1644 |       | 606 | 3 | OAR3_177909045.1   | s26854.1           | 6000.29 | 115 |
| S1644 |       | 702 | 3 | OAR3_178121896.1   | s16918.1           | 11927   | 230 |
| S1644 | CON   | 3   | 3 | OAR3_178121896.1   | OAR3_178996653.1   | 874.757 | 14  |
| S1644 | UNION | 3   | 3 | s44438.1           | s16918.1           | 14243.3 | 253 |
| S1645 |       | 627 | 3 | OAR3_155236610.1   | s75549.1           | 19415.4 | 375 |
| S1645 |       | 629 | 3 | OAR3_155236610.1   | s75549.1           | 19415.4 | 375 |
| S1645 |       | 140 | 3 | OAR3_169586431.1   | s05066.1           | 1509.69 | 33  |
| S1645 | CON   | 3   | 3 | OAR3_169586431.1   | s05066.1           | 1509.69 | 33  |
| S1645 | UNION | 3   | 3 | OAR3_155236610.1   | s75549.1           | 19415.4 | 375 |
| S1653 |       | 126 | 3 | OAR3_152741614.1   | OAR3_163942175.1   | 11200.6 | 212 |
| S1653 |       | 702 | 3 | OAR3_151694139.1   | s22496.1           | 2159.1  | 45  |
| S1653 |       | 507 | 3 | OAR3_151463131.1   | s47510.1           | 2199.78 | 44  |
| S1653 | CON   | 3   | 3 | OAR3_152741614.1   | s47510.1           | 921.292 | 16  |
| S1653 | UNION | 3   | 3 | OAR3_151463131.1   | OAR3_163942175.1   | 12479   | 240 |
| S1654 |       | 152 | 3 | OAR3_134370389.1   | OAR3_137497257.1   | 3126.87 | 67  |
| S1654 |       | 79  | 3 | OAR3_136528538.1   | DU373896_534.1     | 2936.22 | 55  |
| S1654 |       | 616 | 3 | OAR3_137215234.1   | s39414.1           | 5855.2  | 106 |
| S1654 | CON   | 3   | 3 | OAR3_137215234.1   | OAR3_137497257.1   | 282.023 | 5   |
| S1654 | UNION | 3   | 3 | OAR3_134370389.1   | s39414.1           | 8700.05 | 168 |
| S1657 |       | 79  | 3 | OAR3_136528538.1   | DU373896_534.1     | 2936.22 | 55  |
| S1657 |       | 616 | 3 | OAR3_134547477.1   | OAR3_136948456.1   | 2400.98 | 51  |

|       |       |     |   |                  |                    |         |     |
|-------|-------|-----|---|------------------|--------------------|---------|-----|
| S1657 |       | 152 | 3 | OAR3_134370389.1 | OAR3_137497257.1   | 3126.87 | 67  |
| S1657 | CON   | 3   | 3 | OAR3_136528538.1 | OAR3_136948456.1   | 419.918 | 10  |
| S1657 | UNION | 3   | 3 | OAR3_134370389.1 | DU373896_534.1     | 5094.37 | 101 |
| S1661 |       | 90  | 3 | OAR3_129044189.1 | OAR3_134747538.1   | 5703.35 | 108 |
| S1661 |       | 627 | 3 | OAR3_129958976.1 | OAR3_131847250.1   | 1888.27 | 35  |
| S1661 |       | 606 | 3 | OAR3_130714168.1 | OAR3_133664108.1   | 2949.94 | 54  |
| S1661 | CON   | 3   | 3 | OAR3_130714168.1 | OAR3_131847250.1   | 1133.08 | 22  |
| S1661 | UNION | 3   | 3 | OAR3_129044189.1 | OAR3_134747538.1   | 5703.35 | 108 |
| S1664 |       | 90  | 3 | OAR3_129044189.1 | OAR3_134747538.1   | 5703.35 | 108 |
| S1664 |       | 606 | 3 | OAR3_119895458.1 | OAR3_130397300.1   | 10501.8 | 199 |
| S1664 |       | 627 | 3 | OAR3_129958976.1 | OAR3_131847250.1   | 1888.27 | 35  |
| S1664 | CON   | 3   | 3 | OAR3_129958976.1 | OAR3_130397300.1   | 438.324 | 7   |
| S1664 | UNION | 3   | 3 | OAR3_119895458.1 | OAR3_134747538.1   | 14852.1 | 282 |
| S1668 |       | 90  | 3 | OAR3_129044189.1 | OAR3_134747538.1   | 5703.35 | 108 |
| S1668 |       | 507 | 3 | OAR3_124899752.1 | OAR3_129413358.1   | 4513.61 | 83  |
| S1668 |       | 606 | 3 | OAR3_119895458.1 | OAR3_130397300.1   | 10501.8 | 199 |
| S1668 | CON   | 3   | 3 | OAR3_129044189.1 | OAR3_129413358.1   | 369.169 | 7   |
| S1668 | UNION | 3   | 3 | OAR3_119895458.1 | OAR3_134747538.1   | 14852.1 | 282 |
| S1671 |       | 629 | 3 | OAR3_125694577.1 | OAR3_127113616.1   | 1419.04 | 32  |
| S1671 |       | 606 | 3 | OAR3_119895458.1 | OAR3_130397300.1   | 10501.8 | 199 |
| S1671 |       | 507 | 3 | OAR3_124899752.1 | OAR3_129413358.1   | 4513.61 | 83  |
| S1671 | CON   | 3   | 3 | OAR3_125694577.1 | OAR3_127113616.1   | 1419.04 | 32  |
| S1671 | UNION | 3   | 3 | OAR3_119895458.1 | OAR3_130397300.1   | 10501.8 | 199 |
| S1676 |       | 507 | 3 | OAR3_124899752.1 | OAR3_129413358.1   | 4513.61 | 83  |
| S1676 |       | 627 | 3 | OAR3_122721511.1 | OAR3_124899752.1   | 2178.24 | 39  |
| S1676 |       | 606 | 3 | OAR3_119895458.1 | OAR3_130397300.1   | 10501.8 | 199 |
| S1676 | CON   | 3   | 3 | OAR3_124899752.1 | OAR3_124899752.1   | 0       | 1   |
| S1676 | UNION | 3   | 3 | OAR3_119895458.1 | OAR3_130397300.1   | 10501.8 | 199 |
| S1677 |       | 627 | 3 | OAR3_122721511.1 | OAR3_124899752.1   | 2178.24 | 39  |
| S1677 |       | 702 | 3 | OAR3_120965794.1 | OAR3_123473821.1   | 2508.03 | 48  |
| S1677 |       | 606 | 3 | OAR3_119895458.1 | OAR3_130397300.1   | 10501.8 | 199 |
| S1677 | CON   | 3   | 3 | OAR3_122721511.1 | OAR3_123473821.1   | 752.31  | 12  |
| S1677 | UNION | 3   | 3 | OAR3_119895458.1 | OAR3_130397300.1   | 10501.8 | 199 |
| S1681 |       | 629 | 3 | OAR3_112096089.1 | OAR3_121762751.1   | 9666.66 | 172 |
| S1681 |       | 801 | 3 | s65769.1         | s18106.1           | 5900.44 | 108 |
| S1681 |       | 140 | 3 | OAR3_112035267.1 | OAR3_115292618.1   | 3257.35 | 39  |
| S1681 | CON   | 3   | 3 | OAR3_112096089.1 | s18106.1           | 847.867 | 12  |
| S1681 | UNION | 3   | 3 | s65769.1         | OAR3_121762751.1   | 14719.2 | 268 |
| S1684 |       | 45  | 3 | s67646.1         | OAR3_106059938.1   | 1613.14 | 37  |
| S1684 |       | 40  | 3 | s10346.1         | OAR3_104545117_X.1 | 3555.22 | 73  |
| S1684 |       | 844 | 3 | OAR3_99622529.1  | OAR3_104878417_X.1 | 5255.89 | 100 |
| S1684 | CON   | 3   | 3 | s67646.1         | OAR3_104545117_X.1 | 98.318  | 4   |
| S1684 | UNION | 3   | 3 | OAR3_99622529.1  | OAR3_106059938.1   | 6437.41 | 125 |
| S1685 |       | 40  | 3 | s10346.1         | OAR3_104545117_X.1 | 3555.22 | 73  |
| S1685 |       | 844 | 3 | OAR3_99622529.1  | OAR3_104878417_X.1 | 5255.89 | 100 |
| S1685 |       | 507 | 3 | s19649.1         | OAR3_103992674.1   | 3201.34 | 65  |

|       |       |     |   |                    |                    |         |      |
|-------|-------|-----|---|--------------------|--------------------|---------|------|
| S1685 | CON   | 3   | 3 | s10346.1           | OAR3_103992674.1   | 3002.77 | 62   |
| S1685 | UNION | 3   | 3 | OAR3_99622529.1    | OAR3_104878417_X.1 | 5255.89 | 100  |
| S1688 |       | 140 | 3 | OAR3_84830738_X.1  | s18949.1           | 13571.1 | 269  |
| S1688 |       | 606 | 3 | OAR3_95822218.1    | OAR3_97385996.1    | 1563.78 | 31   |
| S1688 |       | 79  | 3 | OAR3_97340255.1    | s66125.1           | 2133.68 | 44   |
| S1688 | CON   | 3   | 3 | OAR3_97340255.1    | OAR3_97385996.1    | 45.741  | 2    |
| S1688 | UNION | 3   | 3 | OAR3_84830738_X.1  | s66125.1           | 14643.2 | 289  |
| S1691 |       | 140 | 3 | OAR3_84830738_X.1  | s18949.1           | 13571.1 | 269  |
| S1691 |       | 40  | 3 | OAR3_93979359.1    | OAR3_97036519.1    | 3057.16 | 59   |
| S1691 |       | 606 | 3 | OAR3_95822218.1    | OAR3_97385996.1    | 1563.78 | 31   |
| S1691 | CON   | 3   | 3 | OAR3_95822218.1    | OAR3_97036519.1    | 1214.3  | 23   |
| S1691 | UNION | 3   | 3 | OAR3_84830738_X.1  | s18949.1           | 13571.1 | 269  |
| S1692 |       | 79  | 3 | s73877.1           | OAR3_84522223.1    | 2064.17 | 49   |
| S1692 |       | 844 | 3 | s55986.1           | s04306.1           | 2324.82 | 51   |
| S1692 |       | 507 | 3 | OAR3_77718162.1    | OAR3_82856188.1    | 5138.03 | 112  |
| S1692 | CON   | 3   | 3 | s73877.1           | OAR3_82856188.1    | 398.134 | 10   |
| S1692 | UNION | 3   | 3 | OAR3_77718162.1    | OAR3_84522223.1    | 6804.06 | 151  |
| S1695 |       | 606 | 3 | OAR3_77361732.1    | OAR3_78678231.1    | 1316.5  | 34   |
| S1695 |       | 49  | 3 | s53138.1           | OAR3_78678231.1    | 1353.04 | 35   |
| S1695 |       | 702 | 3 | OAR3_75163906.1    | OAR3_77576280.1    | 2412.37 | 43   |
| S1695 | CON   | 3   | 3 | OAR3_77361732.1    | OAR3_77576280.1    | 214.548 | 7    |
| S1695 | UNION | 3   | 3 | OAR3_75163906.1    | OAR3_78678231.1    | 3514.32 | 70   |
| S1696 |       | 702 | 3 | DU259120_464.1     | OAR3_59494261.1    | 59494.3 | 1111 |
| S1696 |       | 507 | 3 | OAR3_43871305.1    | OAR3_52722619.1    | 8851.31 | 160  |
| S1696 |       | 556 | 3 | OAR3_51091030.1    | OAR3_53737721.1    | 2646.69 | 51   |
| S1696 | CON   | 3   | 3 | OAR3_51091030.1    | OAR3_52722619.1    | 1631.59 | 31   |
| S1696 | UNION | 3   | 3 | DU259120_464.1     | OAR3_59494261.1    | 59494.3 | 1111 |
| S1697 |       | 801 | 3 | OAR3_31522579_X.1  | OAR3_33093517.1    | 1570.94 | 33   |
| S1697 |       | 702 | 3 | DU259120_464.1     | OAR3_59494261.1    | 59494.3 | 1111 |
| S1697 |       | 27  | 3 | OAR3_28398665.1    | OAR3_32271305.1    | 3872.64 | 80   |
| S1697 | CON   | 3   | 3 | OAR3_31522579_X.1  | OAR3_32271305.1    | 748.726 | 15   |
| S1697 | UNION | 3   | 3 | DU259120_464.1     | OAR3_59494261.1    | 59494.3 | 1111 |
| S1698 |       | 90  | 3 | s32978.1           | OAR3_10168366.1    | 3091.08 | 50   |
| S1698 |       | 29  | 3 | OAR3_6512841.1     | s11633.1           | 8605.75 | 132  |
| S1698 |       | 702 | 3 | DU259120_464.1     | OAR3_59494261.1    | 59494.3 | 1111 |
| S1698 | CON   | 3   | 3 | s32978.1           | OAR3_10168366.1    | 3091.08 | 50   |
| S1698 | UNION | 3   | 3 | DU259120_464.1     | OAR3_59494261.1    | 59494.3 | 1111 |
| S1699 |       | 27  | 3 | DU259120_464.1     | s46170.1           | 2457.2  | 36   |
| S1699 |       | 45  | 3 | OARUn.2445_26203.1 | s25572.1           | 1688.49 | 31   |
| S1699 |       | 702 | 3 | DU259120_464.1     | OAR3_59494261.1    | 59494.3 | 1111 |
| S1699 | CON   | 3   | 3 | DU259120_464.1     | s25572.1           | 1688.49 | 24   |
| S1699 | UNION | 3   | 3 | OARUn.2445_26203.1 | OAR3_59494261.1    | 59494.3 | 1118 |
| S1700 |       | 152 | 2 | OAR2_231739122.1   | OAR2_233585592.1   | 1846.47 | 33   |
| S1700 |       | 45  | 2 | s55941.1           | s46164.1           | 2104    | 34   |
| S1700 |       | 616 | 2 | OAR2_229781196.1   | s00795.1           | 3081.64 | 50   |
| S1700 | CON   | 3   | 2 | OAR2_231739122.1   | s46164.1           | 112.707 | 2    |

|       |       |     |   |                    |                    |         |     |
|-------|-------|-----|---|--------------------|--------------------|---------|-----|
| S1700 | UNION | 3   | 2 | s55941.1           | OAR2_233585592.1   | 3837.76 | 65  |
| S1703 |       | 40  | 2 | OAR2_227627755.1   | s54339.1           | 2648.12 | 33  |
| S1703 |       | 606 | 2 | OAR2_226206105.1   | OAR2_228251894.1   | 2045.79 | 30  |
| S1703 |       | 507 | 2 | OAR2_224687649.1   | s08704.1           | 6568.89 | 90  |
| S1703 | CON   | 3   | 2 | OAR2_227627755.1   | OAR2_228251894.1   | 624.139 | 16  |
| S1703 | UNION | 3   | 2 | OAR2_224687649.1   | s08704.1           | 6568.89 | 90  |
| S1705 |       | 29  | 2 | OAR2_223862860_X.1 | OAR2_226636096.1   | 2773.24 | 53  |
| S1705 |       | 507 | 2 | OAR2_224687649.1   | s08704.1           | 6568.89 | 90  |
| S1705 |       | 606 | 2 | OAR2_226206105.1   | OAR2_228251894.1   | 2045.79 | 30  |
| S1705 | CON   | 3   | 2 | OAR2_226206105.1   | OAR2_226636096.1   | 429.991 | 9   |
| S1705 | UNION | 3   | 2 | OAR2_223862860_X.1 | s08704.1           | 7393.68 | 106 |
| S1706 |       | 29  | 2 | OAR2_223862860_X.1 | OAR2_226636096.1   | 2773.24 | 53  |
| S1706 |       | 140 | 2 | OAR2_221746917.1   | OAR2_225636672.1   | 3889.76 | 77  |
| S1706 |       | 507 | 2 | OAR2_224687649.1   | s08704.1           | 6568.89 | 90  |
| S1706 | CON   | 3   | 2 | OAR2_224687649.1   | OAR2_225636672.1   | 949.023 | 16  |
| S1706 | UNION | 3   | 2 | OAR2_221746917.1   | s08704.1           | 9509.62 | 151 |
| S1707 |       | 627 | 2 | OAR2_217423378.1   | OAR2_219603926.1   | 2180.55 | 38  |
| S1707 |       | 606 | 2 | OAR2_202788294.1   | OAR2_217785599.1   | 14997.3 | 301 |
| S1707 |       | 702 | 2 | OAR2_212387600.1   | OAR2_223862860_X.1 | 11475.3 | 237 |
| S1707 | CON   | 3   | 2 | OAR2_217423378.1   | OAR2_217785599.1   | 362.221 | 10  |
| S1707 | UNION | 3   | 2 | OAR2_202788294.1   | OAR2_223862860_X.1 | 21074.6 | 418 |
| S1708 |       | 606 | 2 | OAR2_202788294.1   | OAR2_217785599.1   | 14997.3 | 301 |
| S1708 |       | 616 | 2 | OAR2_211573792.1   | OAR2_213240793.1   | 1667    | 32  |
| S1708 |       | 702 | 2 | OAR2_212387600.1   | OAR2_223862860_X.1 | 11475.3 | 237 |
| S1708 | CON   | 3   | 2 | OAR2_212387600.1   | OAR2_213240793.1   | 853.193 | 19  |
| S1708 | UNION | 3   | 2 | OAR2_202788294.1   | OAR2_223862860_X.1 | 21074.6 | 418 |
| S1710 |       | 49  | 2 | OAR2_209746295.1   | OAR2_210988344.1   | 1242.05 | 30  |
| S1710 |       | 629 | 2 | OAR2_209681146.1   | OAR2_211110090_X.1 | 1428.94 | 34  |
| S1710 |       | 606 | 2 | OAR2_202788294.1   | OAR2_217785599.1   | 14997.3 | 301 |
| S1710 | CON   | 3   | 2 | OAR2_209746295.1   | OAR2_210988344.1   | 1242.05 | 30  |
| S1710 | UNION | 3   | 2 | OAR2_202788294.1   | OAR2_217785599.1   | 14997.3 | 301 |
| S1713 |       | 606 | 2 | OAR2_202788294.1   | OAR2_217785599.1   | 14997.3 | 301 |
| S1713 |       | 123 | 2 | OAR2_203435142.1   | OAR2_206393167.1   | 2958.03 | 57  |
| S1713 |       | 49  | 2 | s33389.1           | OAR2_208766144.1   | 3724.85 | 63  |
| S1713 | CON   | 3   | 2 | s33389.1           | OAR2_206393167.1   | 1351.88 | 25  |
| S1713 | UNION | 3   | 2 | OAR2_202788294.1   | OAR2_217785599.1   | 14997.3 | 301 |
| S1721 |       | 29  | 2 | s66780.1           | OAR2_199372044.1   | 2067.56 | 41  |
| S1721 |       | 606 | 2 | DU367350_210.1     | OAR2_198741802.1   | 1560.61 | 31  |
| S1721 |       | 140 | 2 | OAR2_191308232.1   | OAR2_203356427.1   | 12048.2 | 217 |
| S1721 | CON   | 3   | 2 | s66780.1           | OAR2_198741802.1   | 1437.32 | 29  |
| S1721 | UNION | 3   | 2 | OAR2_191308232.1   | OAR2_203356427.1   | 12048.2 | 217 |
| S1725 |       | 627 | 2 | OAR2_176575230.1   | OAR2_177997527_X.1 | 1422.3  | 34  |
| S1725 |       | 507 | 2 | OAR2_175831096.1   | OAR2_177656132.1   | 1825.04 | 37  |
| S1725 |       | 29  | 2 | OAR2_177398860.1   | OAR2_179267347.1   | 1868.49 | 42  |
| S1725 | CON   | 3   | 2 | OAR2_177398860.1   | OAR2_177656132.1   | 257.272 | 8   |
| S1725 | UNION | 3   | 2 | OAR2_175831096.1   | OAR2_179267347.1   | 3436.25 | 71  |

|       |       |     |   |                  |                  |         |     |
|-------|-------|-----|---|------------------|------------------|---------|-----|
| S1733 |       | 507 | 2 | OAR2_175831096.1 | OAR2_177656132.1 | 1825.04 | 37  |
| S1733 |       | 616 | 2 | OAR2_172094342.1 | OAR2_175943638.1 | 3849.3  | 82  |
| S1733 |       | 123 | 2 | OAR2_167959232.1 | OAR2_176091475.1 | 8132.24 | 171 |
| S1733 | CON   | 3   | 2 | OAR2_175831096.1 | OAR2_175943638.1 | 112.542 | 3   |
| S1733 | UNION | 3   | 2 | OAR2_167959232.1 | OAR2_177656132.1 | 9696.9  | 202 |
| S1736 |       | 123 | 2 | OAR2_167959232.1 | OAR2_176091475.1 | 8132.24 | 171 |
| S1736 |       | 507 | 2 | OAR2_167852063.1 | OAR2_173821801.1 | 5969.74 | 125 |
| S1736 |       | 629 | 2 | OAR2_166452564.1 | OAR2_168122790.1 | 1670.23 | 31  |
| S1736 | CON   | 3   | 2 | OAR2_167959232.1 | OAR2_168122790.1 | 163.558 | 4   |
| S1736 | UNION | 3   | 2 | OAR2_166452564.1 | OAR2_176091475.1 | 9638.91 | 198 |
| S1745 |       | 29  | 2 | s49391.1         | OAR2_141900838.1 | 2573.2  | 56  |
| S1745 |       | 829 | 2 | OAR2_136846566.1 | OAR2_139588207.1 | 2741.64 | 53  |
| S1745 |       | 702 | 2 | s54108.1         | OAR2_162167662.1 | 23623.2 | 482 |
| S1745 | CON   | 3   | 2 | s49391.1         | OAR2_139588207.1 | 260.572 | 5   |
| S1745 | UNION | 3   | 2 | OAR2_136846566.1 | OAR2_162167662.1 | 25321.1 | 515 |
| S1748 |       | 79  | 2 | OAR2_106891652.1 | s60168.1         | 4096.59 | 85  |
| S1748 |       | 126 | 2 | OAR2_103114233.1 | OAR2_110709711.1 | 7595.48 | 145 |
| S1748 |       | 157 | 2 | OAR2_108603499.1 | s07815.1         | 2262.86 | 45  |
| S1748 | CON   | 3   | 2 | OAR2_108603499.1 | OAR2_110709711.1 | 2106.21 | 41  |
| S1748 | UNION | 3   | 2 | OAR2_103114233.1 | s60168.1         | 7874.01 | 151 |
| S1749 |       | 606 | 2 | s14873.1         | OAR2_96066817.1  | 6724.02 | 118 |
| S1749 |       | 507 | 2 | OAR2_87914191.1  | OAR2_89841590.1  | 1927.4  | 35  |
| S1749 |       | 29  | 2 | OAR2_86182877.1  | s14873.1         | 3159.92 | 65  |
| S1749 | CON   | 3   | 2 | s14873.1         | s14873.1         | 0       | 1   |
| S1749 | UNION | 3   | 2 | OAR2_86182877.1  | OAR2_96066817.1  | 9883.94 | 182 |
| S1750 |       | 606 | 2 | OAR2_56768579.1  | OAR2_61008309.1  | 4239.73 | 80  |
| S1750 |       | 801 | 2 | s20468.1         | OAR2_60156510.1  | 3907.53 | 77  |
| S1750 |       | 616 | 2 | s49388.1         | s53985.1         | 2568.69 | 49  |
| S1750 | CON   | 3   | 2 | OAR2_56768579.1  | s53985.1         | 911.377 | 16  |
| S1750 | UNION | 3   | 2 | s49388.1         | OAR2_61008309.1  | 5897.04 | 113 |
| S1753 |       | 45  | 2 | OAR2_17890079.1  | s50931.1         | 32810.2 | 566 |
| S1753 |       | 49  | 2 | OAR2_33558399.1  | OAR2_36125921.1  | 2567.52 | 49  |
| S1753 |       | 152 | 2 | OAR2_34308093.1  | OAR2_36149474.1  | 1841.38 | 37  |
| S1753 | CON   | 3   | 2 | OAR2_34308093.1  | OAR2_36125921.1  | 1817.83 | 36  |
| S1753 | UNION | 3   | 2 | OAR2_17890079.1  | s50931.1         | 32810.2 | 566 |
| S1754 |       | 627 | 1 | OAR1_273879646.1 | OAR1_276539228.1 | 2659.58 | 46  |
| S1754 |       | 629 | 1 | OAR1_273879646.1 | OAR1_276539228.1 | 2659.58 | 46  |
| S1754 |       | 844 | 1 | s06737.1         | s06522.1         | 3462.3  | 57  |
| S1754 | CON   | 3   | 1 | OAR1_273879646.1 | s06522.1         | 2133.22 | 38  |
| S1754 | UNION | 3   | 1 | s06737.1         | OAR1_276539228.1 | 3988.66 | 65  |
| S1755 |       | 507 | 1 | OAR1_249756050.1 | OAR1_252458792.1 | 2702.74 | 32  |
| S1755 |       | 126 | 1 | OAR1_244520631.1 | OAR1_250407027.1 | 5886.4  | 110 |
| S1755 |       | 40  | 1 | s00653.1         | OAR1_252263073.1 | 2641.09 | 32  |
| S1755 | CON   | 3   | 1 | OAR1_249756050.1 | OAR1_250407027.1 | 650.977 | 11  |
| S1755 | UNION | 3   | 1 | OAR1_244520631.1 | OAR1_252458792.1 | 7938.16 | 131 |

|       |       |     |   |                   |                   |         |     |
|-------|-------|-----|---|-------------------|-------------------|---------|-----|
| S1756 |       | 801 | 1 | OAR1_243458636.1  | OAR1_248022836.1  | 4564.2  | 88  |
| S1756 |       | 702 | 1 | OAR1_244304067.1  | OAR1_246585728.1  | 2281.66 | 41  |
| S1756 |       | 126 | 1 | OAR1_244520631.1  | OAR1_250407027.1  | 5886.4  | 110 |
| S1756 | CON   | 3   | 1 | OAR1_244520631.1  | OAR1_246585728.1  | 2065.1  | 37  |
| S1756 | UNION | 3   | 1 | OAR1_243458636.1  | OAR1_250407027.1  | 6948.39 | 133 |
|       |       |     |   |                   |                   |         |     |
| S1757 |       | 829 | 1 | s65978.1          | OAR1_199615737.1  | 2744.25 | 51  |
| S1757 |       | 79  | 1 | OAR1_195607285.1  | DU464218_590.1    | 2528.45 | 41  |
| S1757 |       | 507 | 1 | OAR1_194627962.1  | OAR1_201343673.1  | 6715.71 | 128 |
| S1757 | CON   | 3   | 1 | s65978.1          | DU464218_590.1    | 1264.24 | 20  |
| S1757 | UNION | 3   | 1 | OAR1_194627962.1  | OAR1_201343673.1  | 6715.71 | 128 |
|       |       |     |   |                   |                   |         |     |
| S1763 |       | 627 | 1 | OAR1_177619398.1  | OAR1_179537892.1  | 1918.49 | 37  |
| S1763 |       | 629 | 1 | OAR1_177619398.1  | OAR1_179537892.1  | 1918.49 | 37  |
| S1763 |       | 61  | 1 | OAR1_178320448.1  | OAR1_182243205.1  | 3922.76 | 64  |
| S1763 | CON   | 3   | 1 | OAR1_178320448.1  | OAR1_179537892.1  | 1217.44 | 26  |
| S1763 | UNION | 3   | 1 | OAR1_177619398.1  | OAR1_182243205.1  | 4623.81 | 75  |
|       |       |     |   |                   |                   |         |     |
| S1764 |       | 702 | 1 | s14189.1          | s40751.1          | 42088.8 | 712 |
| S1764 |       | 844 | 1 | DU295978_729.1    | s38341.1          | 1626.29 | 33  |
| S1764 |       | 829 | 1 | OAR1_106406464.1  | s71474.1          | 2041.81 | 38  |
| S1764 | CON   | 3   | 1 | s14189.1          | s38341.1          | 460.645 | 9   |
| S1764 | UNION | 3   | 1 | OAR1_106406464.1  | s40751.1          | 43406.5 | 739 |
|       |       |     |   |                   |                   |         |     |
| S1766 |       | 829 | 1 | OAR1_106406464.1  | s71474.1          | 2041.81 | 38  |
| S1766 |       | 152 | 1 | s58109.1          | OAR1_107512651.1  | 2376.12 | 34  |
| S1766 |       | 844 | 1 | DU295978_729.1    | s38341.1          | 1626.29 | 33  |
| S1766 | CON   | 3   | 1 | DU295978_729.1    | OAR1_107512651.1  | 954.141 | 20  |
| S1766 | UNION | 3   | 1 | s58109.1          | s71474.1          | 3311.74 | 49  |
|       |       |     |   |                   |                   |         |     |
| S1775 |       | 627 | 1 | s66549.1          | OAR1_98252911_X.1 | 4469.18 | 83  |
| S1775 |       | 629 | 1 | s66549.1          | OAR1_98252911_X.1 | 4469.18 | 83  |
| S1775 |       | 29  | 1 | s13298.1          | s72240.1          | 6757.67 | 123 |
| S1775 | CON   | 3   | 1 | s13298.1          | OAR1_98252911_X.1 | 4283.53 | 79  |
| S1775 | UNION | 3   | 1 | s66549.1          | s72240.1          | 6943.32 | 127 |
|       |       |     |   |                   |                   |         |     |
| S1778 |       | 126 | 1 | OAR1_57941516.1   | OAR1_59376965.1   | 1435.45 | 30  |
| S1778 |       | 507 | 1 | OAR1_54796405.1   | OAR1_60267266.1   | 5470.86 | 89  |
| S1778 |       | 702 | 1 | OAR1_7717464.1    | OAR1_58938560.1   | 51221.1 | 934 |
| S1778 | CON   | 3   | 1 | OAR1_57941516.1   | OAR1_58938560.1   | 997.044 | 21  |
| S1778 | UNION | 3   | 1 | OAR1_7717464.1    | OAR1_60267266.1   | 52549.8 | 957 |
|       |       |     |   |                   |                   |         |     |
| S1783 |       | 702 | 1 | OAR1_7717464.1    | OAR1_58938560.1   | 51221.1 | 934 |
| S1783 |       | 123 | 1 | s25087.1          | OAR1_52085279.1   | 3294.22 | 54  |
| S1783 |       | 126 | 1 | OAR1_51781186.1   | s20612.1          | 1812.25 | 34  |
| S1783 | CON   | 3   | 1 | OAR1_51781186.1   | OAR1_52085279.1   | 304.093 | 8   |
| S1783 | UNION | 3   | 1 | OAR1_7717464.1    | OAR1_58938560.1   | 51221.1 | 934 |
|       |       |     |   |                   |                   |         |     |
| S1787 |       | 629 | 1 | s06710.1          | OAR1_41607999.1   | 1701.38 | 41  |
| S1787 |       | 627 | 1 | OAR1_39162234_X.1 | OAR1_41607999.1   | 2445.76 | 59  |
| S1787 |       | 702 | 1 | OAR1_7717464.1    | OAR1_58938560.1   | 51221.1 | 934 |
| S1787 | CON   | 3   | 1 | s06710.1          | OAR1_41607999.1   | 1701.38 | 41  |
| S1787 | UNION | 3   | 1 | OAR1_7717464.1    | OAR1_58938560.1   | 51221.1 | 934 |
|       |       |     |   |                   |                   |         |     |
| S1791 |       | 702 | 1 | OAR1_7717464.1    | OAR1_58938560.1   | 51221.1 | 934 |

|       |       |     |    |                  |                  |         |      |
|-------|-------|-----|----|------------------|------------------|---------|------|
| S1791 |       | 45  | 1  | s60471.1         | s62110.1         | 1480.32 | 30   |
| S1791 |       | 79  | 1  | s73231.1         | OAR1_16795469.1  | 3934.26 | 80   |
| S1791 | CON   | 3   | 1  | s73231.1         | s62110.1         | 246.549 | 6    |
| S1791 | UNION | 3   | 1  | OAR1_7717464.1   | OAR1_58938560.1  | 51221.1 | 934  |
| S1801 |       | 45  | 1  | s60471.1         | s62110.1         | 1480.32 | 30   |
| S1801 |       | 801 | 1  | OAR1_10454967.1  | s64523.1         | 2104.16 | 46   |
| S1801 |       | 702 | 1  | OAR1_7717464.1   | OAR1_58938560.1  | 51221.1 | 934  |
| S1801 | CON   | 3   | 1  | s60471.1         | s64523.1         | 931.683 | 19   |
| S1801 | UNION | 3   | 1  | OAR1_7717464.1   | OAR1_58938560.1  | 51221.1 | 934  |
| S1808 |       | 702 | 1  | OAR1_7717464.1   | OAR1_58938560.1  | 51221.1 | 934  |
| S1808 |       | 49  | 1  | s52639.1         | OAR1_11087132.1  | 1952.96 | 41   |
| S1808 |       | 801 | 1  | OAR1_10454967.1  | s64523.1         | 2104.16 | 46   |
| S1808 | CON   | 3   | 1  | OAR1_10454967.1  | OAR1_11087132.1  | 632.165 | 16   |
| S1808 | UNION | 3   | 1  | OAR1_7717464.1   | OAR1_58938560.1  | 51221.1 | 934  |
| S1809 |       | 606 | 1  | s65509.1         | OAR1_9881817.1   | 5706.07 | 114  |
| S1809 |       | 702 | 1  | OAR1_7717464.1   | OAR1_58938560.1  | 51221.1 | 934  |
| S1809 |       | 49  | 1  | s52639.1         | OAR1_11087132.1  | 1952.96 | 41   |
| S1809 | CON   | 3   | 1  | s52639.1         | OAR1_9881817.1   | 747.645 | 15   |
| S1809 | UNION | 3   | 1  | s65509.1         | OAR1_58938560.1  | 54762.8 | 1003 |
| S1825 |       | 606 | 1  | s65509.1         | OAR1_9881817.1   | 5706.07 | 114  |
| S1825 |       | 61  | 1  | OAR1_4303667.1   | s49872.1         | 3986.89 | 79   |
| S1825 |       | 702 | 1  | OAR1_7717464.1   | OAR1_58938560.1  | 51221.1 | 934  |
| S1825 | CON   | 3   | 1  | OAR1_7717464.1   | s49872.1         | 573.092 | 13   |
| S1825 | UNION | 3   | 1  | s65509.1         | OAR1_58938560.1  | 54762.8 | 1003 |
| S1829 |       | 152 | 1  | OAR1_2921089.1   | s05524.1         | 1595.06 | 31   |
| S1829 |       | 90  | 1  | OAR1_2921089.1   | s05524.1         | 1595.06 | 31   |
| S1829 |       | 507 | 1  | s16921.1         | OAR1_2921089.1   | 2439.63 | 48   |
| S1829 | CON   | 3   | 1  | OAR1_2921089.1   | OAR1_2921089.1   | 0       | 1    |
| S1829 | UNION | 3   | 1  | s16921.1         | s05524.1         | 4034.69 | 78   |
| S1838 |       | 123 | 26 | OAR26_31513764.1 | s26909.1         | 2564.63 | 43   |
| S1838 |       | 29  | 26 | OAR26_26341151.1 | OAR26_31513764.1 | 5172.61 | 112  |
| S1838 | CON   | 2   | 26 | OAR26_31513764.1 | OAR26_31513764.1 | 0       | 1    |
| S1838 | UNION | 2   | 26 | OAR26_26341151.1 | s26909.1         | 7737.25 | 154  |
| S1839 |       | 702 | 26 | s61801.1         | OAR26_8526649.1  | 4644.93 | 52   |
| S1839 |       | 90  | 26 | OAR26_6073159.1  | OAR26_10130406.1 | 4057.25 | 46   |
| S1839 | CON   | 2   | 26 | OAR26_6073159.1  | OAR26_8526649.1  | 2453.49 | 15   |
| S1839 | UNION | 2   | 26 | s61801.1         | OAR26_10130406.1 | 6248.69 | 83   |
| S1840 |       | 702 | 26 | s61801.1         | OAR26_8526649.1  | 4644.93 | 52   |
| S1840 |       | 152 | 26 | s69000.1         | s37421.1         | 2783.02 | 44   |
| S1840 | CON   | 2   | 26 | s61801.1         | s37421.1         | 212.698 | 4    |
| S1840 | UNION | 2   | 26 | s69000.1         | OAR26_8526649.1  | 7215.25 | 92   |
| S1845 |       | 152 | 26 | s69000.1         | s37421.1         | 2783.02 | 44   |
| S1845 |       | 79  | 26 | OAR26_222715_X.1 | OAR26_2342925.1  | 2120.21 | 34   |
| S1845 | CON   | 2   | 26 | s69000.1         | OAR26_2342925.1  | 1031.53 | 16   |
| S1845 | UNION | 2   | 26 | OAR26_222715_X.1 | s37421.1         | 3871.7  | 62   |



|       |       |     |    |                  |                  |         |     |
|-------|-------|-----|----|------------------|------------------|---------|-----|
| S1846 |       | 90  | 25 | s55436.1         | s16017.1         | 1399.6  | 33  |
| S1846 |       | 126 | 25 | s43830.1         | OAR25_42361627.1 | 5972.37 | 102 |
| S1846 | CON   | 2   | 25 | s55436.1         | OAR25_42361627.1 | 493.581 | 10  |
| S1846 | UNION | 2   | 25 | s43830.1         | s16017.1         | 6878.39 | 125 |
| S1848 |       | 126 | 25 | s43830.1         | OAR25_42361627.1 | 5972.37 | 102 |
| S1848 |       | 45  | 25 | OAR25_34706036.1 | s00537.1         | 2304.11 | 38  |
| S1848 | CON   | 2   | 25 | s43830.1         | s00537.1         | 620.89  | 5   |
| S1848 | UNION | 2   | 25 | OAR25_34706036.1 | OAR25_42361627.1 | 7655.59 | 135 |
| S1855 |       | 629 | 25 | s32866.1         | OAR25_31259191.1 | 2423.01 | 48  |
| S1855 |       | 844 | 25 | OAR25_30336172.1 | OAR25_34247335.1 | 3911.16 | 81  |
| S1855 | CON   | 2   | 25 | OAR25_30336172.1 | OAR25_31259191.1 | 923.019 | 18  |
| S1855 | UNION | 2   | 25 | s32866.1         | OAR25_34247335.1 | 5411.15 | 111 |
| S1856 |       | 702 | 24 | s35472.1         | OAR24_22201078.1 | 16855.5 | 259 |
| S1856 |       | 29  | 24 | OAR24_20737428.1 | OAR24_24557331.1 | 3819.9  | 58  |
| S1856 | CON   | 2   | 24 | OAR24_20737428.1 | OAR24_22201078.1 | 1463.65 | 22  |
| S1856 | UNION | 2   | 24 | s35472.1         | OAR24_24557331.1 | 19211.8 | 295 |
| S1857 |       | 702 | 24 | s35472.1         | OAR24_22201078.1 | 16855.5 | 259 |
| S1857 |       | 844 | 24 | s20579.1         | OAR24_19275672.1 | 2066.83 | 31  |
| S1857 | CON   | 2   | 24 | s20579.1         | OAR24_19275672.1 | 2066.83 | 31  |
| S1857 | UNION | 2   | 24 | s35472.1         | OAR24_22201078.1 | 16855.5 | 259 |
| S1858 |       | 123 | 20 | OAR20_46544221.1 | OAR20_49453726.1 | 2909.51 | 63  |
| S1858 |       | 90  | 20 | OAR20_47650422.1 | OAR20_48933969.1 | 1283.55 | 34  |
| S1858 | CON   | 2   | 20 | OAR20_47650422.1 | OAR20_48933969.1 | 1283.55 | 34  |
| S1858 | UNION | 2   | 20 | OAR20_46544221.1 | OAR20_49453726.1 | 2909.51 | 63  |
| S1859 |       | 702 | 20 | OAR20_27119.1    | OAR20_14072832.1 | 14045.7 | 264 |
| S1859 |       | 79  | 20 | OAR20_5451328.1  | s10150.1         | 1705.68 | 36  |
| S1859 | CON   | 2   | 20 | OAR20_5451328.1  | s10150.1         | 1705.68 | 36  |
| S1859 | UNION | 2   | 20 | OAR20_27119.1    | OAR20_14072832.1 | 14045.7 | 264 |
| S1861 |       | 702 | 20 | OAR20_27119.1    | OAR20_14072832.1 | 14045.7 | 264 |
| S1861 |       | 829 | 20 | OAR20_1876702.1  | OAR20_3795317.1  | 1918.62 | 33  |
| S1861 | CON   | 2   | 20 | OAR20_1876702.1  | OAR20_3795317.1  | 1918.62 | 33  |
| S1861 | UNION | 2   | 20 | OAR20_27119.1    | OAR20_14072832.1 | 14045.7 | 264 |
| S1867 |       | 507 | 19 | OAR19_57425358.1 | s72187.1         | 4215.44 | 84  |
| S1867 |       | 140 | 19 | OAR19_59472800.1 | s42346.1         | 2466.57 | 50  |
| S1867 | CON   | 2   | 19 | OAR19_59472800.1 | s72187.1         | 2168    | 46  |
| S1867 | UNION | 2   | 19 | OAR19_57425358.1 | s42346.1         | 4514.01 | 88  |
| S1875 |       | 27  | 19 | s21070.1         | OAR19_58095077.1 | 2593.53 | 49  |
| S1875 |       | 507 | 19 | OAR19_57425358.1 | s72187.1         | 4215.44 | 84  |
| S1875 | CON   | 2   | 19 | OAR19_57425358.1 | OAR19_58095077.1 | 669.719 | 17  |
| S1875 | UNION | 2   | 19 | s21070.1         | s72187.1         | 6139.25 | 116 |
| S1876 |       | 79  | 19 | s55682.1         | OAR19_34354181.1 | 2692.56 | 49  |
| S1876 |       | 49  | 19 | OAR19_21684191.1 | s55682.1         | 9977.43 | 163 |
| S1876 | CON   | 2   | 19 | s55682.1         | s55682.1         | 0       | 1   |
| S1876 | UNION | 2   | 19 | OAR19_21684191.1 | OAR19_34354181.1 | 12670   | 211 |

|       |       |     |    |                  |                    |         |     |
|-------|-------|-----|----|------------------|--------------------|---------|-----|
| S1877 |       | 507 | 19 | s21945.1         | s40021.1           | 5779.07 | 97  |
| S1877 |       | 45  | 19 | OAR19_3773707.1  | OAR19_13260250.1   | 9486.54 | 172 |
| S1877 | CON   | 2   | 19 | OAR19_3773707.1  | s40021.1           | 2005.36 | 30  |
| S1877 | UNION | 2   | 19 | s21945.1         | OAR19_13260250.1   | 13260.2 | 239 |
| S1880 |       | 123 | 18 | s11395.1         | s27043.1           | 2663.63 | 33  |
| S1880 |       | 90  | 18 | s25861.1         | s27043.1           | 5385.42 | 82  |
| S1880 | CON   | 2   | 18 | s11395.1         | s27043.1           | 2663.63 | 33  |
| S1880 | UNION | 2   | 18 | s25861.1         | s27043.1           | 5385.42 | 82  |
| S1881 |       | 629 | 18 | OAR18_61168943.1 | OAR18_64788162_X.1 | 3619.22 | 69  |
| S1881 |       | 829 | 18 | OAR18_56445082.1 | s36667.1           | 4906.48 | 93  |
| S1881 | CON   | 2   | 18 | OAR18_61168943.1 | s36667.1           | 182.617 | 6   |
| S1881 | UNION | 2   | 18 | OAR18_56445082.1 | OAR18_64788162_X.1 | 8343.08 | 156 |
| S1882 |       | 507 | 18 | s44433.1         | OAR18_29143813.1   | 9489.05 | 160 |
| S1882 |       | 79  | 18 | s67627.1         | OAR18_32289792.1   | 5604.77 | 96  |
| S1882 | CON   | 2   | 18 | s67627.1         | OAR18_29143813.1   | 2458.79 | 41  |
| S1882 | UNION | 2   | 18 | s44433.1         | OAR18_32289792.1   | 12635   | 215 |
| S1901 |       | 702 | 17 | OAR17_36966397.1 | OAR17_74039265.1   | 37072.9 | 600 |
| S1901 |       | 629 | 17 | OAR17_35667529.1 | OAR17_37633929.1   | 1966.4  | 31  |
| S1901 | CON   | 2   | 17 | OAR17_36966397.1 | OAR17_37633929.1   | 667.532 | 9   |
| S1901 | UNION | 2   | 17 | OAR17_35667529.1 | OAR17_74039265.1   | 38371.7 | 622 |
| S1902 |       | 29  | 17 | s32218.1         | OAR17_13356947.1   | 2562.88 | 39  |
| S1902 |       | 126 | 17 | OAR17_10638840.1 | OAR17_12428758.1   | 1789.92 | 32  |
| S1902 | CON   | 2   | 17 | s32218.1         | OAR17_12428758.1   | 1634.69 | 28  |
| S1902 | UNION | 2   | 17 | OAR17_10638840.1 | OAR17_13356947.1   | 2718.11 | 43  |
| S1940 |       | 40  | 17 | s28180.1         | OAR17_1899290.1    | 1899.29 | 41  |
| S1940 |       | 49  | 17 | OAR17_1348956.1  | s32327.1           | 2023.51 | 33  |
| S1940 | CON   | 2   | 17 | OAR17_1348956.1  | OAR17_1899290.1    | 550.334 | 12  |
| S1940 | UNION | 2   | 17 | s28180.1         | s32327.1           | 3372.47 | 62  |
| S1953 |       | 801 | 16 | OAR16_74703566.1 | OAR16_77087111.1   | 2383.55 | 40  |
| S1953 |       | 627 | 16 | OAR16_75395749.1 | OAR16_77087111.1   | 1691.36 | 30  |
| S1953 | CON   | 2   | 16 | OAR16_75395749.1 | OAR16_77087111.1   | 1691.36 | 30  |
| S1953 | UNION | 2   | 16 | OAR16_74703566.1 | OAR16_77087111.1   | 2383.55 | 40  |
| S1954 |       | 702 | 16 | OAR16_63959301.1 | s59627.1           | 11378.9 | 220 |
| S1954 |       | 801 | 16 | OAR16_74703566.1 | OAR16_77087111.1   | 2383.55 | 40  |
| S1954 | CON   | 2   | 16 | OAR16_74703566.1 | s59627.1           | 634.588 | 9   |
| S1954 | UNION | 2   | 16 | OAR16_63959301.1 | OAR16_77087111.1   | 13127.8 | 251 |
| S1955 |       | 40  | 16 | OAR16_31845248.1 | OAR16_33763548.1   | 1918.3  | 42  |
| S1955 |       | 61  | 16 | OAR16_32465649.1 | OAR16_50643262_X.1 | 18177.6 | 326 |
| S1955 | CON   | 2   | 16 | OAR16_32465649.1 | OAR16_33763548.1   | 1297.9  | 31  |
| S1955 | UNION | 2   | 16 | OAR16_31845248.1 | OAR16_50643262_X.1 | 18798   | 337 |
| S1956 |       | 702 | 16 | s52990.1         | OAR16_10814090.1   | 10538   | 191 |
| S1956 |       | 616 | 16 | OAR16_10423797.1 | OAR16_12590773.1   | 2166.98 | 39  |
| S1956 | CON   | 2   | 16 | OAR16_10423797.1 | OAR16_10814090.1   | 390.293 | 9   |
| S1956 | UNION | 2   | 16 | s52990.1         | OAR16_12590773.1   | 12314.7 | 221 |

|       |       |     |    |                  |                  |         |     |
|-------|-------|-----|----|------------------|------------------|---------|-----|
| S1965 |       | 152 | 16 | s01739.1         | OAR16_1141118.1  | 1141.12 | 32  |
| S1965 |       | 702 | 16 | s52990.1         | OAR16_10814090.1 | 10538   | 191 |
| S1965 | CON   | 2   | 16 | s52990.1         | OAR16_1141118.1  | 865.063 | 19  |
| S1965 | UNION | 2   | 16 | s01739.1         | OAR16_10814090.1 | 10814.1 | 204 |
| S1973 |       | 27  | 15 | OAR15_75169402.1 | OAR15_81649572.1 | 6480.17 | 139 |
| S1973 |       | 829 | 15 | s19862.1         | OAR15_82598585.1 | 1679.87 | 37  |
| S1973 | CON   | 2   | 15 | s19862.1         | OAR15_81649572.1 | 730.856 | 18  |
| S1973 | UNION | 2   | 15 | OAR15_75169402.1 | OAR15_82598585.1 | 7429.18 | 158 |
| S1976 |       | 27  | 15 | OAR15_75169402.1 | OAR15_81649572.1 | 6480.17 | 139 |
| S1976 |       | 629 | 15 | OAR15_77451211.1 | s20239.1         | 2428.37 | 49  |
| S1976 | CON   | 2   | 15 | OAR15_77451211.1 | s20239.1         | 2428.37 | 49  |
| S1976 | UNION | 2   | 15 | OAR15_75169402.1 | OAR15_81649572.1 | 6480.17 | 139 |
| S1979 |       | 27  | 15 | s02392.1         | OAR15_69475511.1 | 1333.85 | 32  |
| S1979 |       | 29  | 15 | OAR15_67681322.1 | s08876.1         | 1591.56 | 36  |
| S1979 | CON   | 2   | 15 | s02392.1         | s08876.1         | 1131.22 | 26  |
| S1979 | UNION | 2   | 15 | OAR15_67681322.1 | OAR15_69475511.1 | 1794.19 | 42  |
| S1986 |       | 126 | 15 | OAR15_66122063.1 | s05923.1         | 1875.42 | 38  |
| S1986 |       | 29  | 15 | OAR15_67681322.1 | s08876.1         | 1591.56 | 36  |
| S1986 | CON   | 2   | 15 | OAR15_67681322.1 | s05923.1         | 316.164 | 7   |
| S1986 | UNION | 2   | 15 | OAR15_66122063.1 | s08876.1         | 3150.82 | 67  |
| S1999 |       | 702 | 15 | OAR15_63768341.1 | OAR15_66653722.1 | 2885.38 | 65  |
| S1999 |       | 126 | 15 | OAR15_66122063.1 | s05923.1         | 1875.42 | 38  |
| S1999 | CON   | 2   | 15 | OAR15_66122063.1 | OAR15_66653722.1 | 531.659 | 13  |
| S1999 | UNION | 2   | 15 | OAR15_63768341.1 | s05923.1         | 4229.15 | 90  |
| S2007 |       | 627 | 15 | s61769.1         | OAR15_63068221.1 | 3484.81 | 67  |
| S2007 |       | 61  | 15 | OAR15_62680174.1 | OAR15_65584079.1 | 2903.91 | 67  |
| S2007 | CON   | 2   | 15 | OAR15_62680174.1 | OAR15_63068221.1 | 388.047 | 8   |
| S2007 | UNION | 2   | 15 | s61769.1         | OAR15_65584079.1 | 6000.67 | 126 |
| S2008 |       | 627 | 15 | s61769.1         | OAR15_63068221.1 | 3484.81 | 67  |
| S2008 |       | 27  | 15 | OAR15_50594253.1 | s18566.1         | 9220.78 | 110 |
| S2008 | CON   | 2   | 15 | s61769.1         | s18566.1         | 231.623 | 4   |
| S2008 | UNION | 2   | 15 | OAR15_50594253.1 | OAR15_63068221.1 | 12474   | 173 |
| S2009 |       | 702 | 15 | s33423.1         | s34566.1         | 24919.4 | 406 |
| S2009 |       | 507 | 15 | OAR15_24033751.1 | s73229.1         | 2732.28 | 57  |
| S2009 | CON   | 2   | 15 | OAR15_24033751.1 | s34566.1         | 885.657 | 16  |
| S2009 | UNION | 2   | 15 | s33423.1         | s73229.1         | 26766   | 447 |
| S2010 |       | 40  | 14 | OAR14_33605988.1 | OAR14_38944771.1 | 5338.78 | 86  |
| S2010 |       | 801 | 14 | OAR14_38675883.1 | s10566.1         | 3947.09 | 73  |
| S2010 | CON   | 2   | 14 | OAR14_38675883.1 | OAR14_38944771.1 | 268.888 | 6   |
| S2010 | UNION | 2   | 14 | OAR14_33605988.1 | s10566.1         | 9016.99 | 153 |
| S2016 |       | 40  | 14 | OAR14_33605988.1 | OAR14_38944771.1 | 5338.78 | 86  |
| S2016 |       | 616 | 14 | s45533.1         | OAR14_38144388.1 | 3606.21 | 60  |
| S2016 | CON   | 2   | 14 | s45533.1         | OAR14_38144388.1 | 3606.21 | 60  |
| S2016 | UNION | 2   | 14 | OAR14_33605988.1 | OAR14_38944771.1 | 5338.78 | 86  |

|       |       |     |    |                   |                  |         |     |
|-------|-------|-----|----|-------------------|------------------|---------|-----|
| S2023 |       | 702 | 13 | s43103.1          | s69997.1         | 32663.3 | 559 |
| S2023 |       | 801 | 13 | s03976.1          | OAR13_77841865.1 | 1709.86 | 31  |
| S2023 | CON   | 2   | 13 | s03976.1          | OAR13_77841865.1 | 1709.86 | 31  |
| S2023 | UNION | 2   | 13 | s43103.1          | s69997.1         | 32663.3 | 559 |
| S2025 |       | 79  | 13 | s27782.1          | s05134.1         | 2127.73 | 36  |
| S2025 |       | 702 | 13 | s43103.1          | s69997.1         | 32663.3 | 559 |
| S2025 | CON   | 2   | 13 | s43103.1          | s05134.1         | 1016.3  | 12  |
| S2025 | UNION | 2   | 13 | s27782.1          | s69997.1         | 33774.8 | 583 |
| S2026 |       | 702 | 13 | s44144.1          | OAR13_19332393.1 | 2130.3  | 31  |
| S2026 |       | 829 | 13 | s12849.1          | OAR13_20578061.1 | 2410.3  | 38  |
| S2026 | CON   | 2   | 13 | s12849.1          | OAR13_19332393.1 | 1164.63 | 11  |
| S2026 | UNION | 2   | 13 | s44144.1          | OAR13_20578061.1 | 3375.97 | 58  |
| S2027 |       | 829 | 13 | s50299.1          | OAR13_4181900.1  | 2114.41 | 33  |
| S2027 |       | 126 | 13 | OAR13_2980585_X.1 | s00832.1         | 9013.02 | 139 |
| S2027 | CON   | 2   | 13 | OAR13_2980585_X.1 | OAR13_4181900.1  | 1201.31 | 17  |
| S2027 | UNION | 2   | 13 | s50299.1          | s00832.1         | 9926.12 | 155 |
| S2030 |       | 829 | 13 | s50299.1          | OAR13_4181900.1  | 2114.41 | 33  |
| S2030 |       | 606 | 13 | s05862.1          | s26388.1         | 2756.91 | 46  |
| S2030 | CON   | 2   | 13 | s50299.1          | s26388.1         | 689.417 | 14  |
| S2030 | UNION | 2   | 13 | s05862.1          | OAR13_4181900.1  | 4181.9  | 65  |
| S2031 |       | 616 | 12 | s64119.1          | s72379.1         | 1671.9  | 31  |
| S2031 |       | 507 | 12 | s13792.1          | s57817.1         | 31188.2 | 514 |
| S2031 | CON   | 2   | 12 | s13792.1          | s72379.1         | 1671.9  | 25  |
| S2031 | UNION | 2   | 12 | s64119.1          | s57817.1         | 31188.2 | 520 |
| S2032 |       | 702 | 11 | OAR11_57135966.1  | OAR11_63846580.1 | 6710.61 | 109 |
| S2032 |       | 629 | 11 | OAR11_63756556.1  | s75931.1         | 3121.75 | 63  |
| S2032 | CON   | 2   | 11 | OAR11_63756556.1  | OAR11_63846580.1 | 90.024  | 3   |
| S2032 | UNION | 2   | 11 | OAR11_57135966.1  | s75931.1         | 9742.34 | 169 |
| S2035 |       | 49  | 11 | OAR11_38296265.1  | s43569.1         | 2252.46 | 51  |
| S2035 |       | 90  | 11 | OAR11_38296265.1  | OAR11_41384177.1 | 3087.91 | 65  |
| S2035 | CON   | 2   | 11 | OAR11_38296265.1  | s43569.1         | 2252.46 | 51  |
| S2035 | UNION | 2   | 11 | OAR11_38296265.1  | OAR11_41384177.1 | 3087.91 | 65  |
| S2036 |       | 702 | 11 | OAR11_17172323.1  | OAR11_33359712.1 | 16187.4 | 260 |
| S2036 |       | 616 | 11 | s48715.1          | OAR11_17355206.1 | 1626.28 | 30  |
| S2036 | CON   | 2   | 11 | OAR11_17172323.1  | OAR11_17355206.1 | 182.883 | 3   |
| S2036 | UNION | 2   | 11 | s48715.1          | OAR11_33359712.1 | 17630.8 | 287 |
| S2042 |       | 606 | 11 | OAR11_13995527.1  | s64017.1         | 2212.32 | 36  |
| S2042 |       | 616 | 11 | s48715.1          | OAR11_17355206.1 | 1626.28 | 30  |
| S2042 | CON   | 2   | 11 | s48715.1          | s64017.1         | 478.914 | 9   |
| S2042 | UNION | 2   | 11 | OAR11_13995527.1  | OAR11_17355206.1 | 3359.68 | 57  |
| S2055 |       | 606 | 11 | OAR11_13995527.1  | s64017.1         | 2212.32 | 36  |
| S2055 |       | 152 | 11 | OAR11_11155896.1  | OAR11_14457337.1 | 3301.44 | 51  |
| S2055 | CON   | 2   | 11 | OAR11_13995527.1  | OAR11_14457337.1 | 461.81  | 9   |
| S2055 | UNION | 2   | 11 | OAR11_11155896.1  | s64017.1         | 5051.95 | 78  |

|       |       |     |    |                  |                  |         |      |
|-------|-------|-----|----|------------------|------------------|---------|------|
| S2056 |       | 152 | 11 | OAR11_11155896.1 | OAR11_14457337.1 | 3301.44 | 51   |
| S2056 |       | 140 | 11 | s17757.1         | OAR11_13845361.1 | 6147.79 | 100  |
| S2056 | CON   | 2   | 11 | OAR11_11155896.1 | OAR11_13845361.1 | 2689.47 | 42   |
| S2056 | UNION | 2   | 11 | s17757.1         | OAR11_14457337.1 | 6759.76 | 109  |
| S2065 |       | 79  | 11 | OAR11_7689262.1  | OAR11_9760146.1  | 2070.88 | 37   |
| S2065 |       | 140 | 11 | s17757.1         | OAR11_13845361.1 | 6147.79 | 100  |
| S2065 | CON   | 2   | 11 | s17757.1         | OAR11_9760146.1  | 2062.57 | 36   |
| S2065 | UNION | 2   | 11 | OAR11_7689262.1  | OAR11_13845361.1 | 6156.1  | 101  |
| S2075 |       | 90  | 11 | s36390.1         | OAR11_4977042.1  | 4977.04 | 75   |
| S2075 |       | 627 | 11 | s60426.1         | OAR11_5531600.1  | 5531.6  | 79   |
| S2075 | CON   | 2   | 11 | s36390.1         | OAR11_4977042.1  | 4977.04 | 75   |
| S2075 | UNION | 2   | 11 | s60426.1         | OAR11_5531600.1  | 5531.6  | 79   |
| S2081 |       | 79  | 10 | OAR10_79145098.1 | s67060.1         | 9854.04 | 210  |
| S2081 |       | 45  | 10 | OAR10_88694929.1 | s26573.1         | 3303.51 | 74   |
| S2081 | CON   | 2   | 10 | OAR10_88694929.1 | s67060.1         | 304.208 | 8    |
| S2081 | UNION | 2   | 10 | OAR10_79145098.1 | s26573.1         | 12853.3 | 276  |
| S2088 |       | 152 | 10 | OAR10_56312119.1 | OAR10_72914358.1 | 16602.2 | 277  |
| S2088 |       | 61  | 10 | OAR10_70486969.1 | OAR10_71983430.1 | 1496.46 | 32   |
| S2088 | CON   | 2   | 10 | OAR10_70486969.1 | OAR10_71983430.1 | 1496.46 | 32   |
| S2088 | UNION | 2   | 10 | OAR10_56312119.1 | OAR10_72914358.1 | 16602.2 | 277  |
| S2089 |       | 702 | 9  | OAR9_38323108.1  | OAR9_96544082.1  | 58221   | 1087 |
| S2089 |       | 126 | 9  | OAR9_90292422.1  | OAR9_92302903.1  | 2010.48 | 35   |
| S2089 | CON   | 2   | 9  | OAR9_90292422.1  | OAR9_92302903.1  | 2010.48 | 35   |
| S2089 | UNION | 2   | 9  | OAR9_38323108.1  | OAR9_96544082.1  | 58221   | 1087 |
| S2104 |       | 606 | 9  | s18791.1         | s12376.1         | 1409.01 | 30   |
| S2104 |       | 126 | 9  | DU189362_554.1   | OAR9_18382789.1  | 2963.12 | 61   |
| S2104 | CON   | 2   | 9  | s18791.1         | OAR9_18382789.1  | 1194.62 | 25   |
| S2104 | UNION | 2   | 9  | DU189362_554.1   | s12376.1         | 3177.51 | 66   |
| S2105 |       | 844 | 9  | OAR9_5773857.1   | s10011.1         | 10109   | 172  |
| S2105 |       | 126 | 9  | DU189362_554.1   | OAR9_18382789.1  | 2963.12 | 61   |
| S2105 | CON   | 2   | 9  | DU189362_554.1   | s10011.1         | 463.149 | 7    |
| S2105 | UNION | 2   | 9  | OAR9_5773857.1   | OAR9_18382789.1  | 12608.9 | 226  |
| S2110 |       | 844 | 9  | OAR9_5773857.1   | s10011.1         | 10109   | 172  |
| S2110 |       | 157 | 9  | OAR9_6141526.1   | OAR9_8154368.1   | 2012.84 | 42   |
| S2110 | CON   | 2   | 9  | OAR9_6141526.1   | OAR9_8154368.1   | 2012.84 | 42   |
| S2110 | UNION | 2   | 9  | OAR9_5773857.1   | s10011.1         | 10109   | 172  |
| S2118 |       | 844 | 9  | OAR9_1100990.1   | OAR9_2578369.1   | 1477.38 | 35   |
| S2118 |       | 123 | 9  | OAR9_1203135.1   | s25647.1         | 4723.76 | 95   |
| S2118 | CON   | 2   | 9  | OAR9_1203135.1   | OAR9_2578369.1   | 1375.23 | 32   |
| S2118 | UNION | 2   | 9  | OAR9_1100990.1   | s25647.1         | 4825.9  | 98   |
| S2119 |       | 61  | 8  | OAR8_91007371.1  | OAR8_93131673.1  | 2124.3  | 53   |
| S2119 |       | 152 | 8  | OAR8_89335331.1  | OAR8_91007371.1  | 1672.04 | 33   |
| S2119 | CON   | 2   | 8  | OAR8_91007371.1  | OAR8_91007371.1  | 0       | 1    |
| S2119 | UNION | 2   | 8  | OAR8_89335331.1  | OAR8_93131673.1  | 3796.34 | 85   |

|       |       |     |   |                    |                    |         |     |
|-------|-------|-----|---|--------------------|--------------------|---------|-----|
| S2120 |       | 152 | 8 | OAR8_89335331.1    | OAR8_91007371.1    | 1672.04 | 33  |
| S2120 |       | 606 | 8 | OAR8_86919224.1    | OAR8_89769401.1    | 2850.18 | 48  |
| S2120 | CON   | 2   | 8 | OAR8_89335331.1    | OAR8_89769401.1    | 434.07  | 9   |
| S2120 | UNION | 2   | 8 | OAR8_86919224.1    | OAR8_91007371.1    | 4088.15 | 72  |
| S2121 |       | 556 | 8 | OAR8_76403936.1    | OAR8_78079638.1    | 1675.7  | 31  |
| S2121 |       | 49  | 8 | OAR8_77578890.1    | s01826.1           | 8664.11 | 175 |
| S2121 | CON   | 2   | 8 | OAR8_77578890.1    | OAR8_78079638.1    | 500.748 | 13  |
| S2121 | UNION | 2   | 8 | OAR8_76403936.1    | s01826.1           | 9839.07 | 193 |
| S2122 |       | 29  | 8 | s18645.1           | OAR8_25237806.1    | 2587.54 | 51  |
| S2122 |       | 45  | 8 | OAR8_23402353.1    | OAR8_27562398.1    | 4160.05 | 77  |
| S2122 | CON   | 2   | 8 | OAR8_23402353.1    | OAR8_25237806.1    | 1835.45 | 35  |
| S2122 | UNION | 2   | 8 | s18645.1           | OAR8_27562398.1    | 4912.13 | 93  |
| S2123 |       | 627 | 7 | s69307.1           | s26632.1           | 2216.96 | 41  |
| S2123 |       | 829 | 7 | OAR7_14417486.1    | s34022.1           | 1808.19 | 30  |
| S2123 | CON   | 2   | 7 | OAR7_14417486.1    | s26632.1           | 932.8   | 16  |
| S2123 | UNION | 2   | 7 | s69307.1           | s34022.1           | 3092.35 | 55  |
| S2125 |       | 627 | 7 | s69307.1           | s26632.1           | 2216.96 | 41  |
| S2125 |       | 45  | 7 | s23542.1           | s45087.1           | 5861.48 | 112 |
| S2125 | CON   | 2   | 7 | s69307.1           | s45087.1           | 999.191 | 20  |
| S2125 | UNION | 2   | 7 | s23542.1           | s26632.1           | 7079.25 | 133 |
| S2128 |       | 616 | 6 | CZ925803_293.1     | OAR6_1493254.1     | 1493.25 | 34  |
| S2128 |       | 507 | 6 | DU325267_788.1     | OAR6_1493254.1     | 1493.25 | 33  |
| S2128 | CON   | 2   | 6 | DU325267_788.1     | OAR6_1493254.1     | 1493.25 | 33  |
| S2128 | UNION | 2   | 6 | CZ925803_293.1     | OAR6_1493254.1     | 1493.25 | 34  |
| S2141 |       | 90  | 5 | OAR5_114683952_X.1 | s35247.1           | 1658.6  | 34  |
| S2141 |       | 61  | 5 | DU254733_336.1     | OAR5_114683952_X.1 | 4203.15 | 89  |
| S2141 | CON   | 2   | 5 | OAR5_114683952_X.1 | OAR5_114683952_X.1 | 0       | 1   |
| S2141 | UNION | 2   | 5 | DU254733_336.1     | s35247.1           | 5861.74 | 122 |
| S2158 |       | 157 | 5 | OAR5_39158574.1    | s68199.1           | 1599.72 | 30  |
| S2158 |       | 29  | 5 | s73882.1           | s71821.1           | 3780.56 | 56  |
| S2158 | CON   | 2   | 5 | s73882.1           | s68199.1           | 1401.93 | 26  |
| S2158 | UNION | 2   | 5 | OAR5_39158574.1    | s71821.1           | 3978.35 | 60  |
| S2159 |       | 140 | 5 | OAR5_3860366.1     | OAR5_6287899.1     | 2427.53 | 44  |
| S2159 |       | 61  | 5 | s01567.1           | s02696.1           | 1571.18 | 33  |
| S2159 | CON   | 2   | 5 | OAR5_3860366.1     | s02696.1           | 469.931 | 11  |
| S2159 | UNION | 2   | 5 | s01567.1           | OAR5_6287899.1     | 3528.78 | 66  |
| S2161 |       | 79  | 5 | s27919.1           | s61513.1           | 1626.57 | 33  |
| S2161 |       | 61  | 5 | s49055.1           | s68430.1           | 1830.42 | 39  |
| S2161 | CON   | 2   | 5 | s27919.1           | s61513.1           | 1626.57 | 33  |
| S2161 | UNION | 2   | 5 | s49055.1           | s68430.1           | 1830.42 | 39  |
| S2165 |       | 126 | 4 | OAR4_103661998.1   | s45195.1           | 8630.78 | 167 |
| S2165 |       | 507 | 4 | s01174.1           | OAR4_103958721.1   | 2865.96 | 52  |
| S2165 | CON   | 2   | 4 | OAR4_103661998.1   | OAR4_103958721.1   | 296.723 | 4   |
| S2165 | UNION | 2   | 4 | s01174.1           | s45195.1           | 11200   | 215 |

|       |       |     |   |                    |                  |         |     |
|-------|-------|-----|---|--------------------|------------------|---------|-----|
| S2169 |       | 507 | 4 | OAR4_93485963.1    | OAR4_100549333.1 | 7063.37 | 140 |
| S2169 |       | 27  | 4 | OAR4_95602342.1    | OAR4_97182894.1  | 1580.55 | 33  |
| S2169 | CON   | 2   | 4 | OAR4_95602342.1    | OAR4_97182894.1  | 1580.55 | 33  |
| S2169 | UNION | 2   | 4 | OAR4_93485963.1    | OAR4_100549333.1 | 7063.37 | 140 |
| S2170 |       | 507 | 4 | OAR4_93485963.1    | OAR4_100549333.1 | 7063.37 | 140 |
| S2170 |       | 702 | 4 | OAR4_92612139.1    | OAR4_94029674.1  | 1417.54 | 30  |
| S2170 | CON   | 2   | 4 | OAR4_93485963.1    | OAR4_94029674.1  | 543.711 | 9   |
| S2170 | UNION | 2   | 4 | OAR4_92612139.1    | OAR4_100549333.1 | 7937.19 | 161 |
| S2175 |       | 702 | 4 | OAR4_92612139.1    | OAR4_94029674.1  | 1417.54 | 30  |
| S2175 |       | 123 | 4 | OAR4_87201676.1    | OAR4_92644037.1  | 5442.36 | 118 |
| S2175 | CON   | 2   | 4 | OAR4_92612139.1    | OAR4_92644037.1  | 31.898  | 2   |
| S2175 | UNION | 2   | 4 | OAR4_87201676.1    | OAR4_94029674.1  | 6828    | 146 |
| S2188 |       | 627 | 4 | OAR4_31796734.1    | OAR4_36438393.1  | 4641.66 | 71  |
| S2188 |       | 79  | 4 | OAR4_33506082.1    | OAR4_37638709.1  | 4132.63 | 60  |
| S2188 | CON   | 2   | 4 | OAR4_33506082.1    | OAR4_36438393.1  | 2932.31 | 39  |
| S2188 | UNION | 2   | 4 | OAR4_31796734.1    | OAR4_37638709.1  | 5841.98 | 92  |
| S2215 |       | 152 | 3 | s06412.1           | CL635750_128.1   | 2705.55 | 50  |
| S2215 |       | 616 | 3 | OAR3_239536012.1   | s35224.1         | 3234.43 | 56  |
| S2215 | CON   | 2   | 3 | OAR3_239536012.1   | CL635750_128.1   | 2662.22 | 49  |
| S2215 | UNION | 2   | 3 | s06412.1           | s35224.1         | 3277.77 | 57  |
| S2216 |       | 79  | 3 | OAR3_229469681_X.1 | s43578.1         | 2300.26 | 45  |
| S2216 |       | 49  | 3 | s51494.1           | s55067.1         | 1446.29 | 32  |
| S2216 | CON   | 2   | 3 | s51494.1           | s43578.1         | 1323.88 | 28  |
| S2216 | UNION | 2   | 3 | OAR3_229469681_X.1 | s55067.1         | 2422.67 | 49  |
| S2251 |       | 616 | 3 | OAR3_222498151.1   | s64031.1         | 4093.34 | 42  |
| S2251 |       | 29  | 3 | s65742.1           | OAR3_229832073.1 | 4118    | 90  |
| S2251 | CON   | 2   | 3 | s65742.1           | s64031.1         | 877.426 | 21  |
| S2251 | UNION | 2   | 3 | OAR3_222498151.1   | OAR3_229832073.1 | 7333.92 | 111 |
| S2252 |       | 616 | 3 | OAR3_145545612.1   | OAR3_147645542.1 | 2099.93 | 37  |
| S2252 |       | 61  | 3 | s68368.1           | s28071.1         | 2515.12 | 41  |
| S2252 | CON   | 2   | 3 | OAR3_145545612.1   | s28071.1         | 385.672 | 8   |
| S2252 | UNION | 2   | 3 | s68368.1           | OAR3_147645542.1 | 4229.38 | 70  |
| S2265 |       | 140 | 3 | OAR3_84830738_X.1  | s18949.1         | 13571.1 | 269 |
| S2265 |       | 606 | 3 | s14327.1           | OAR3_91597532.1  | 1663.8  | 34  |
| S2265 | CON   | 2   | 3 | s14327.1           | OAR3_91597532.1  | 1663.8  | 34  |
| S2265 | UNION | 2   | 3 | OAR3_84830738_X.1  | s18949.1         | 13571.1 | 269 |
| S2272 |       | 123 | 3 | s26313.1           | OAR3_86263758.1  | 2301.95 | 49  |
| S2272 |       | 79  | 3 | s73877.1           | OAR3_84522223.1  | 2064.17 | 49  |
| S2272 | CON   | 2   | 3 | s26313.1           | OAR3_84522223.1  | 560.418 | 15  |
| S2272 | UNION | 2   | 3 | s73877.1           | OAR3_86263758.1  | 3805.7  | 83  |
| S2273 |       | 157 | 3 | OAR3_70578986.1    | OAR3_76536013.1  | 5957.03 | 117 |
| S2273 |       | 702 | 3 | OAR3_75163906.1    | OAR3_77576280.1  | 2412.37 | 43  |
| S2273 | CON   | 2   | 3 | OAR3_75163906.1    | OAR3_76536013.1  | 1372.11 | 28  |
| S2273 | UNION | 2   | 3 | OAR3_70578986.1    | OAR3_77576280.1  | 6997.29 | 132 |

|       |       |     |   |                  |                  |         |      |
|-------|-------|-----|---|------------------|------------------|---------|------|
| S2281 |       | 702 | 3 | DU259120_464.1   | OAR3_59494261.1  | 59494.3 | 1111 |
| S2281 |       | 140 | 3 | OAR3_54716452.1  | OAR3_59312021.1  | 4595.57 | 77   |
| S2281 | CON   | 2   | 3 | OAR3_54716452.1  | OAR3_59312021.1  | 4595.57 | 77   |
| S2281 | UNION | 2   | 3 | DU259120_464.1   | OAR3_59494261.1  | 59494.3 | 1111 |
| S2282 |       | 140 | 2 | OAR2_191308232.1 | OAR2_203356427.1 | 12048.2 | 217  |
| S2282 |       | 606 | 2 | OAR2_202788294.1 | OAR2_217785599.1 | 14997.3 | 301  |
| S2282 | CON   | 2   | 2 | OAR2_202788294.1 | OAR2_203356427.1 | 568.133 | 14   |
| S2282 | UNION | 2   | 2 | OAR2_191308232.1 | OAR2_217785599.1 | 26477.4 | 504  |
| S2283 |       | 140 | 2 | OAR2_191308232.1 | OAR2_203356427.1 | 12048.2 | 217  |
| S2283 |       | 79  | 2 | OAR2_200229728.1 | OAR2_202002170.1 | 1772.44 | 32   |
| S2283 | CON   | 2   | 2 | OAR2_200229728.1 | OAR2_202002170.1 | 1772.44 | 32   |
| S2283 | UNION | 2   | 2 | OAR2_191308232.1 | OAR2_203356427.1 | 12048.2 | 217  |
| S2284 |       | 29  | 2 | OAR2_177398860.1 | OAR2_179267347.1 | 1868.49 | 42   |
| S2284 |       | 702 | 2 | OAR2_178886050.1 | s29646.1         | 4550.66 | 94   |
| S2284 | CON   | 2   | 2 | OAR2_178886050.1 | OAR2_179267347.1 | 381.297 | 11   |
| S2284 | UNION | 2   | 2 | OAR2_177398860.1 | s29646.1         | 6037.85 | 125  |
| S2297 |       | 629 | 2 | OAR2_166452564.1 | OAR2_168122790.1 | 1670.23 | 31   |
| S2297 |       | 152 | 2 | s39150.1         | OAR2_166756467.1 | 5092.89 | 98   |
| S2297 | CON   | 2   | 2 | OAR2_166452564.1 | OAR2_166756467.1 | 303.903 | 5    |
| S2297 | UNION | 2   | 2 | s39150.1         | OAR2_168122790.1 | 6459.22 | 124  |
| S2306 |       | 829 | 2 | OAR2_136846566.1 | OAR2_139588207.1 | 2741.64 | 53   |
| S2306 |       | 126 | 2 | OAR2_136603669.1 | s33638.1         | 1519.62 | 32   |
| S2306 | CON   | 2   | 2 | OAR2_136846566.1 | s33638.1         | 1276.73 | 26   |
| S2306 | UNION | 2   | 2 | OAR2_136603669.1 | OAR2_139588207.1 | 2984.54 | 59   |
| S2307 |       | 126 | 2 | OAR2_103114233.1 | OAR2_110709711.1 | 7595.48 | 145  |
| S2307 |       | 61  | 2 | OAR2_103477474.1 | OAR2_105771325.1 | 2293.85 | 42   |
| S2307 | CON   | 2   | 2 | OAR2_103477474.1 | OAR2_105771325.1 | 2293.85 | 42   |
| S2307 | UNION | 2   | 2 | OAR2_103114233.1 | OAR2_110709711.1 | 7595.48 | 145  |
| S2310 |       | 27  | 2 | OAR2_99492787.1  | OAR2_101577512.1 | 2084.72 | 39   |
| S2310 |       | 29  | 2 | OAR2_99441563.1  | OAR2_101087449.1 | 1645.89 | 31   |
| S2310 | CON   | 2   | 2 | OAR2_99492787.1  | OAR2_101087449.1 | 1594.66 | 30   |
| S2310 | UNION | 2   | 2 | OAR2_99441563.1  | OAR2_101577512.1 | 2135.95 | 40   |
| S2325 |       | 79  | 2 | OAR2_85975965.1  | OAR2_87651563.1  | 1675.6  | 39   |
| S2325 |       | 29  | 2 | OAR2_86182877.1  | s14873.1         | 3159.92 | 65   |
| S2325 | CON   | 2   | 2 | OAR2_86182877.1  | OAR2_87651563.1  | 1468.69 | 33   |
| S2325 | UNION | 2   | 2 | OAR2_85975965.1  | s14873.1         | 3366.83 | 71   |
| S2346 |       | 49  | 2 | OAR2_80768977.1  | OAR2_82226321.1  | 1457.34 | 33   |
| S2346 |       | 606 | 2 | OAR2_74253113.1  | OAR2_82226321.1  | 7973.21 | 148  |
| S2346 | CON   | 2   | 2 | OAR2_80768977.1  | OAR2_82226321.1  | 1457.34 | 33   |
| S2346 | UNION | 2   | 2 | OAR2_74253113.1  | OAR2_82226321.1  | 7973.21 | 148  |
| S2349 |       | 49  | 2 | OAR2_61907594.1  | OAR2_74652390.1  | 12744.8 | 265  |
| S2349 |       | 140 | 2 | OAR2_70498239.1  | OAR2_72286121.1  | 1787.88 | 34   |
| S2349 | CON   | 2   | 2 | OAR2_70498239.1  | OAR2_72286121.1  | 1787.88 | 34   |
| S2349 | UNION | 2   | 2 | OAR2_61907594.1  | OAR2_74652390.1  | 12744.8 | 265  |



|       |       |     |   |                  |                  |         |     |
|-------|-------|-----|---|------------------|------------------|---------|-----|
| S2355 |       | 49  | 2 | OAR2_61907594.1  | OAR2_74652390.1  | 12744.8 | 265 |
| S2355 |       | 140 | 2 | OAR2_61042748.1  | OAR2_62188067.1  | 1145.32 | 30  |
| S2355 | CON   | 2   | 2 | OAR2_61907594.1  | OAR2_62188067.1  | 280.473 | 9   |
| S2355 | UNION | 2   | 2 | OAR2_61042748.1  | OAR2_74652390.1  | 13609.6 | 286 |
| S2360 |       | 29  | 2 | s05611.1         | OAR2_55308142.1  | 7693.97 | 128 |
| S2360 |       | 616 | 2 | s49388.1         | s53985.1         | 2568.69 | 49  |
| S2360 | CON   | 2   | 2 | s49388.1         | OAR2_55308142.1  | 196.876 | 5   |
| S2360 | UNION | 2   | 2 | s05611.1         | s53985.1         | 10065.8 | 172 |
| S2390 |       | 45  | 2 | OAR2_17890079.1  | s50931.1         | 32810.2 | 566 |
| S2390 |       | 79  | 2 | DU469454_586.1   | s67704.1         | 3578.21 | 58  |
| S2390 | CON   | 2   | 2 | DU469454_586.1   | s67704.1         | 3578.21 | 58  |
| S2390 | UNION | 2   | 2 | OAR2_17890079.1  | s50931.1         | 32810.2 | 566 |
| S2391 |       | 123 | 2 | s60459.1         | OAR2_7255676.1   | 1801.8  | 34  |
| S2391 |       | 616 | 2 | OAR2_5168646.1   | OAR2_7255676.1   | 2087.03 | 37  |
| S2391 | CON   | 2   | 2 | s60459.1         | OAR2_7255676.1   | 1801.8  | 34  |
| S2391 | UNION | 2   | 2 | OAR2_5168646.1   | OAR2_7255676.1   | 2087.03 | 37  |
| S2398 |       | 801 | 1 | s09883.1         | s73870.1         | 6372.31 | 95  |
| S2398 |       | 844 | 1 | s06737.1         | s06522.1         | 3462.3  | 57  |
| S2398 | CON   | 2   | 1 | s06737.1         | s73870.1         | 680.544 | 12  |
| S2398 | UNION | 2   | 1 | s09883.1         | s06522.1         | 9154.06 | 140 |
| S2405 |       | 152 | 1 | OAR1_262561308.1 | OAR1_266535457.1 | 3974.15 | 71  |
| S2405 |       | 507 | 1 | OAR1_266243405.1 | OAR1_270405323.1 | 4161.92 | 75  |
| S2405 | CON   | 2   | 1 | OAR1_266243405.1 | OAR1_266535457.1 | 292.052 | 6   |
| S2405 | UNION | 2   | 1 | OAR1_262561308.1 | OAR1_270405323.1 | 7844.02 | 140 |
| S2412 |       | 61  | 1 | OAR1_178320448.1 | OAR1_182243205.1 | 3922.76 | 64  |
| S2412 |       | 79  | 1 | OAR1_182020254.1 | OAR1_185615587.1 | 3595.33 | 73  |
| S2412 | CON   | 2   | 1 | OAR1_182020254.1 | OAR1_182243205.1 | 222.951 | 4   |
| S2412 | UNION | 2   | 1 | OAR1_178320448.1 | OAR1_185615587.1 | 7295.14 | 133 |
| S2417 |       | 152 | 1 | s58109.1         | OAR1_107512651.1 | 2376.12 | 34  |
| S2417 |       | 606 | 1 | OAR1_103790218.1 | s53969.1         | 2417.3  | 31  |
| S2417 | CON   | 2   | 1 | s58109.1         | s53969.1         | 1070.98 | 7   |
| S2417 | UNION | 2   | 1 | OAR1_103790218.1 | OAR1_107512651.1 | 3722.43 | 58  |
| S2418 |       | 29  | 1 | s13298.1         | s72240.1         | 6757.67 | 123 |
| S2418 |       | 40  | 1 | OAR1_98760723.1  | OAR1_100874172.1 | 2113.45 | 39  |
| S2418 | CON   | 2   | 1 | OAR1_98760723.1  | s72240.1         | 1966.32 | 36  |
| S2418 | UNION | 2   | 1 | s13298.1         | OAR1_100874172.1 | 6904.8  | 126 |
| S2423 |       | 507 | 1 | OAR1_81699780.1  | OAR1_83030838.1  | 1331.06 | 32  |
| S2423 |       | 49  | 1 | s55899.1         | OAR1_83030838.1  | 2911.73 | 67  |
| S2423 | CON   | 2   | 1 | OAR1_81699780.1  | OAR1_83030838.1  | 1331.06 | 32  |
| S2423 | UNION | 2   | 1 | s55899.1         | OAR1_83030838.1  | 2911.73 | 67  |
| S2424 |       | 507 | 1 | OAR1_77772595.1  | OAR1_80338579.1  | 2565.98 | 53  |
| S2424 |       | 49  | 1 | s55899.1         | OAR1_83030838.1  | 2911.73 | 67  |
| S2424 | CON   | 2   | 1 | s55899.1         | OAR1_80338579.1  | 219.467 | 6   |
| S2424 | UNION | 2   | 1 | OAR1_77772595.1  | OAR1_83030838.1  | 5258.24 | 114 |
