# Supplementary material for: Microphthalmia in Texel Sheep Is Associated with a Missense Mutation in the Paired-Like Homeodomain 3 (PITX3) Gene
Source: PubMed Central journal article supplement (PMC2805710; doi:10.1371/journal.pone.0008689), 2010-01-13
Supplement: pone.0008689.s004.pdf [file pone.0008689.s004.pdf]

**Table S2.** Microsatellites.

| Marker         | Genomic position                    |                    | Cases |                |               | Controls |                |               |
|----------------|-------------------------------------|--------------------|-------|----------------|---------------|----------|----------------|---------------|
|                | Virtual Sheep GenomeBrowser v2 [Mb] | SheepMap v4.7 [cM] | n     | No. of alleles | Obs. het. [%] | n        | No. of alleles | Obs. het. [%] |
| <i>D9M1722</i> | 24.197                              | 34.5               | 134   | 4              | 0.20          | 212      | 8              | 0.84          |
| <i>INRA81</i>  | 24.901                              | 35.6               | 134   | 4              | 0.03          | 212      | 21             | 0.90          |
| <i>BMS332</i>  | 28.519                              | 36.9               | 134   | 7              | 0.52          | 212      | 12             | 0.92          |
