# Supplementary material for: Microphthalmia in Texel Sheep Is Associated with a Missense Mutation in the Paired-Like Homeodomain 3 (PITX3) Gene
Source: PubMed Central journal article supplement (PMC2805710; doi:10.1371/journal.pone.0008689), 2010-01-13
Supplement: pone.0008689.s005.pdf [file pone.0008689.s005.pdf]

**Table S3.** Primer sequences for the amplification of ovine *PITX3*.

| <i>PITX3</i> | Exon   |        | Coding sequence |        |        |        | Forward primer |                         | Reverse primer |                      | PCR product size (bp) |
|--------------|--------|--------|-----------------|--------|--------|--------|----------------|-------------------------|----------------|----------------------|-----------------------|
|              | Start* | End*   | Length          | Start* | End*   | Length | Start*         | Sequence (5'-3')        | Start*         | Sequence (5'-3')     |                       |
| 5'UTR        |        |        |                 |        |        |        | 19'854         | AGGCAGCTTAAGGGAGCAAT    | 20'576         | TGGGCTTCTTGCTCTCAGAT | 723                   |
| 5'UTR        |        |        |                 |        |        |        | 20'441         | GGGAAGCCCCTGGATACTCT    | 21'392         | AAGGTGGAAAATGGCTCAGA | 952                   |
| 5'UTR        |        |        |                 |        |        |        | 21'242         | CTCCTCAGTAGGTTGGTGTACCT | 22'084         | GCTTCGTGGAGAGTTTGGAG | 843                   |
| 5'UTR        |        |        |                 |        |        |        | 21'831         | GCCTTGACAAGTCTGGGAGA    | 22'767         | CAGCGCCCAATCACTTTATG | 937                   |
| exon 1       | 22'798 | 22'959 | 162             |        |        |        | 22'653         | ACAGCTGGAAAGGGTGGAG     | 23'673         | GGACATTGTGTCCGCTTTG  | 1021                  |
| intron 1     |        |        |                 |        |        |        | 23'475         | TTGTGAGAACCCGACAGCGA    | 24'265         | AAAGGGCTGCAGTTTTCTCT | 791                   |
| intron 1     |        |        |                 |        |        |        | 24'110         | TGACAGCTTCAGTCCCTCA     | 24'546         | TAAGTGGTTCTGGTTAAAG  | 437                   |
| exon 1A      | 24'467 | 24'586 | 120             |        |        |        | 24'382         | GATCCAACACAGGACCCAGA    | 24'766         | GCCAGTGATAAATGAACTTT | 385                   |
| intron 1     |        |        |                 |        |        |        | 24'635         | TGCAGCATTATTCAGCAATG    | 25'612         | AATGCCAGGAATGACCATTC | 978                   |
| intron 1     |        |        |                 |        |        |        | 25'493         | AGGAGTGGCAAGAGCTCAG     | 26'536         | ATGGGCCAGTGTAGCCTGC  | 1044                  |
| intron 1     |        |        |                 |        |        |        | 26'427         | AGTGACTCCCCTGCTTGA      | 27'379         | GAGAATGTAGCTGCTCTGGA | 953                   |
| intron 1     |        |        |                 |        |        |        | 27'221         | AATATGAACCCCACTTCC      | 28'086         | GTAAGTGGCCAAGGCACAAG | 866                   |
| intron 1     |        |        |                 |        |        |        | 27'907         | TTTCAGGTTCCATCCTGTTT    | 28'773         | GCTAGGCAGGCAACAGAGAG | 867                   |
| intron 1     |        |        |                 |        |        |        | 28'642         | TTAATCCTCAGCCAGCCTGT    | 29'500         | GCTGAGGTGGGGAGAGTATG | 859                   |
| intron 1     |        |        |                 |        |        |        | 29'387         | GGTATACTGGATTACTTTCC    | 29'964         | CAGCATTCCATACCTGTGTC | 578                   |
| intron 1     |        |        |                 |        |        |        | 29'848         | CACAGCCTGAAGTCTGCTTT    | 30'306         | GTCAGAGGCTTAGGAGTAGG | 459                   |
| intron 1     |        |        |                 |        |        |        | 30'155         | TGAAGAGATTCAGAGCACC     | 31'060         | GTCTGCTTCTGTACATTGCA | 906                   |
| intron 1     |        |        |                 |        |        |        | 30'941         | GCATGGGGAGTAATGGTCAG    | 31'918         | CAGGTTATCTGGTTCCCAGT | 978                   |
| exon 2       | 31'966 | 32'099 | 134             | 31'982 | 32'099 | 118    | 31'795         | CCACTTAGGCTGCTGTTTCC    | 32'248         | ACATCCTTGCCTGAGCAGAT | 454                   |
| exon 3       | 32'278 | 32'480 | 203             | 32'278 | 32'480 | 203    | 32'121         | GGTGGGGGAAATAAAAGCTC    | 32'708         | TCTAGGGCGAGAGAGTGGAG | 588                   |
| exon 4       | 32'985 | 33'907 | 923             | 32'985 | 33'572 | 588    | 32'791         | GATACTGTCACCCCGACTC     | 33'802         | GGTCCCTATTCTGGCCTTA  | 1012                  |
| 3'UTR        |        |        |                 |        |        |        | 33'629         | GACTGGGGTTCGTTTTGACTG   | 34'500         | GTTTTCAGGGTTTGGGGATT | 872                   |

\*position on EMBL accession FN432136
