# Supplementary material for: Microphthalmia in Texel Sheep Is Associated with a Missense Mutation in the Paired-Like Homeodomain 3 (PITX3) Gene
Source: PubMed Central journal article supplement (PMC2805710; doi:10.1371/journal.pone.0008689), 2010-01-13
Supplement: pone.0008689.s006.pdf [file pone.0008689.s006.pdf]

**Table S4.** Primer sequences for the amplification of ovine *PITX3* and *PAX2* cDNA.

|                      | <i>PITX3</i> cDNA position |                | Localization within ovine <i>PITX3</i> | Forward primer sequence (5'-3') | Reverse primer sequence (5'-3') | PCR product size (bp) |
|----------------------|----------------------------|----------------|----------------------------------------|---------------------------------|---------------------------------|-----------------------|
|                      | Start                      | End            |                                        |                                 |                                 |                       |
| 5' RACE outer primer | 534                        |                | exon 4                                 |                                 | GTTGACCGAGTTGAAGGCGAAC          |                       |
| 5' RACE inner primer |                            | 183            | exon 3                                 |                                 | CTTTTCTTCAGCGAGCCGTCTT          |                       |
| RT-PCR               | -203                       | 233 after Stop | exon 1 / 3'UTR                         | CCTGCTTGCCTTCCAGACTGC           | ACTGGTCCCTATTCTGGCCTTAGT        | 1345/1225             |
|                      | <i>PAX2</i> cDNA position  |                | Localization within ovine <i>PAX2</i>  | Forward primer sequence (5'-3') | Reverse primer sequence (5'-3') | PCR product size (bp) |
|                      | Start                      | End            |                                        |                                 |                                 |                       |
| RT-PCR               | -88                        | 30 after Stop  | 5'UTR / 3'UTR                          | CCCTCCCTTTTCTCCTCAAG            | GCCTGAAGCTTGATGTGGTC            | 1303                  |
